# Supplementary material
Source: PubMed Central journal article supplement (PMC2575252)
Supplement: 0709403105_SD1.pdf [file 0709403105_SD1.pdf]

\$slcompose,+ zpq-pnas zpq-pnas zpq69908 zpq4406-08a\$sl

<zkeybdr;disk;bc>

<XXzpq999084406XX>

<<tt>>Dataset S1. DNA array expression results

| ORF     | Systematic Name | <i>hho1Δ</i> 25 <sup>o</sup> vs. wild type 25 <sup>o</sup> fold change | <i>hho1Δ</i> 37 <sup>o</sup> vs. wild type 25 <sup>o</sup> fold change | wild type 37 <sup>o</sup> vs. wild type 25 <sup>o</sup> fold change | <i>hho1Δ</i> 37 <sup>o</sup> vs. wild type 37 <sup>o</sup> fold change |
|---------|-----------------|------------------------------------------------------------------------|------------------------------------------------------------------------|---------------------------------------------------------------------|------------------------------------------------------------------------|
| TFC3    | YAL001C         | -1.127008794                                                           | -1.200325563                                                           | 1.436863529                                                         | -1.197061509                                                           |
| VPS8    | YAL002W         | 1.292310597                                                            | -1.249348262                                                           | 1.00504949                                                          | 1.243071386                                                            |
| EFB1    | YAL003W         | -1.34428878                                                            | -1.716528121                                                           | 1.080885285                                                         | -1.855369987                                                           |
| YAL004W | YAL004W         | 1.215799781                                                            | 2.732580938                                                            | 3.859331644                                                         | -1.412339372                                                           |
| SSA1    | YAL005C         | 1.086284162                                                            | 7.615557156                                                            | 10.65345608                                                         | -1.398906981                                                           |
| ERP2    | YAL007C         | 1.088487211                                                            | -1.380233408                                                           | -1.388755536                                                        | 1.006174411                                                            |
| FUN14   | YAL008W         | 1.008480841                                                            | 3.20906489                                                             | 3.289533196                                                         | -1.025075313                                                           |
| SPO7    | YAL009W         | -1.013941289                                                           | -1.027134047                                                           | -1.076737468                                                        | 1.105953713                                                            |
| MDM10   | YAL010C         | -1.274199674                                                           | -1.489049069                                                           | 1.426407679                                                         | 1.043915489                                                            |
| SWC1    | YAL011W         | 1.030376105                                                            | -1.042827164                                                           | -1.425687185                                                        | 1.367136601                                                            |
| CYS3    | YAL012W         | 1.208192749                                                            | -1.20374282                                                            | -1.110777864                                                        | -1.083693562                                                           |
| DEP1    | YAL013W         | -1.033726124                                                           | -1.255613385                                                           | 1.555001824                                                         | -1.238439987                                                           |
| UIP2    | YAL014C         | 1.115276678                                                            | -1.333404109                                                           | 1.400026038                                                         | -1.049963795                                                           |
| NTG1    | YAL015C         | -1.002887403                                                           | 2.088398736                                                            | 1.993947438                                                         | 1.047369001                                                            |
| TPD3    | YAL016W         | 1.006426892                                                            | -1.369419011                                                           | 1.502331779                                                         | -1.097057779                                                           |
| PSK1    | YAL017W         | 1.025023516                                                            | 3.29186974                                                             | 3.079019252                                                         | 1.069129314                                                            |
| FUN30   | YAL019W         | 1.239541467                                                            | -3.903759662                                                           | -5.481268696                                                        | 1.404099937                                                            |
| ATS1    | YAL020C         | 1.021304128                                                            | -1.025302481                                                           | 1.240890646                                                         | -1.272288257                                                           |
| CCR4    | YAL021C         | 1.365952104                                                            | -1.231379875                                                           | -1.257312851                                                        | 1.548229741                                                            |
| FUN26   | YAL022C         | 1.091813424                                                            | -1.044432246                                                           | 1.074994315                                                         | -1.029261897                                                           |
| PMT2    | YAL023C         | 1.226980314                                                            | -1.188914975                                                           | -1.535485005                                                        | 1.291501107                                                            |
| LTE1    | YAL024C         | 1.036299177                                                            | -1.219797365                                                           | -1.200949424                                                        | -1.015694201                                                           |
| MAK16   | YAL025C         | -1.163707629                                                           | -26.41456723                                                           | -29.34600816                                                        | 1.110978192                                                            |
| DRS2    | YAL026C         | 1.053476882                                                            | -1.295774504                                                           | -1.233809484                                                        | -1.050222519                                                           |
| YAL027W | YAL027W         | -1.119529844                                                           | -1.152368764                                                           | -1.043849758                                                        | -1.103960369                                                           |
| YAL028W | YAL028W         | 1.143385868                                                            | 3.473051204                                                            | 3.004049624                                                         | 1.156123113                                                            |
| MYO4    | YAL029C         | 1.069459235                                                            | -1.788045103                                                           | -2.451162865                                                        | 1.370861876                                                            |
| SNC1    | YAL030W         | -1.069637254                                                           | -1.532805283                                                           | 2.025636074                                                         | -1.321522111                                                           |
| FUN21   | YAL031C         | 1.129808199                                                            | -1.908164845                                                           | 1.546073888                                                         | 1.234200293                                                            |
| PRP45   | YAL032C         | -1.096786392                                                           | -1.155360514                                                           | 1.184239997                                                         | -1.024996079                                                           |
| POP5    | YAL033W         | -1.103749731                                                           | -2.903866834                                                           | -2.656835765                                                        | -1.092979428                                                           |
| FUN19   | YAL034C         | -1.036487377                                                           | 3.463720055                                                            | 4.49629891                                                          | -1.298112676                                                           |
| MTW1    | YAL034W-A       | -1.145683137                                                           | -1.245397923                                                           | -1.444829436                                                        | 1.160134773                                                            |
| FUN12   | YAL035W         | 1.195892324                                                            | -3.376042364                                                           | -4.292093383                                                        | 1.271338721                                                            |
| FUN11   | YAL036C         | -1.078152335                                                           | -8.269297433                                                           | -6.427850262                                                        | -1.286479476                                                           |
| YAL037W | YAL037W         | 1.272755332                                                            | -1.265026788                                                           | -1.677672995                                                        | 1.326195627                                                            |
| CYC3    | YAL039C         | -1.025520132                                                           | -1.354780402                                                           | 1.280460908                                                         | 1.058041205                                                            |
| CLN3    | YAL040C         | 1.371801543                                                            | -1.20268295                                                            | -1.483702088                                                        | 1.784423206                                                            |

|           |           |              |              |              |              |
|-----------|-----------|--------------|--------------|--------------|--------------|
| CDC24     | YAL041W   | -1.026889852 | -1.262754008 | 1.297570985  | -1.027572256 |
| KRE23     | YAL042C-A | -1.090086489 | -1.264091933 | 1.320707792  | -1.04478777  |
| ERV46     | YAL042W   | -1.04212588  | -1.766681714 | -1.518241818 | -1.163636578 |
| PTA1      | YAL043C   | 1.249617783  | -1.070833179 | -1.259117238 | 1.348304515  |
| GCV3      | YAL044C   | -1.201675785 | -1.26638936  | 1.607630187  | -1.269459645 |
| YAL044W-A | YAL044W-A | 1.060830157  | -1.689015674 | -1.513033239 | -1.116311017 |
| YAL046C   | YAL046C   | -1.27303654  | -1.716144586 | -1.00463245  | -1.708231289 |
| SPC72     | YAL047C   | 1.136684479  | -1.299145914 | 1.027471863  | 1.26441021   |
| YAL048C   | YAL048C   | 1.199426501  | -1.709109452 | 1.28110855   | 1.334086368  |
| YAL049C   | YAL049C   | -1.123042666 | -1.431988635 | 1.706730065  | -1.191860063 |
| OAF1      | YAL051W   | 1.068505947  | -1.542000707 | 1.370501564  | 1.125136043  |
| YAL053W   | YAL053W   | 1.350384546  | -1.583878025 | 1.24924866   | 1.267864497  |
| ACS1      | YAL054C   | 1.198173028  | 3.928241962  | 3.351407675  | 1.172117016  |
| PEX22     | YAL055W   | -1.298079047 | -1.545955919 | 2.023142784  | -1.308667834 |
| GPB2      | YAL056W   | -1.240234258 | -1.021073935 | 1.167370106  | -1.191971187 |
| CNE1      | YAL058W   | 1.037133055  | -1.114578261 | -1.133713832 | 1.263612791  |
| ECM1      | YAL059W   | -1.30591163  | -12.44070969 | -11.82015834 | -1.052499411 |
| BDH1      | YAL060W   | 1.050770937  | 6.612626684  | 6.976360882  | -1.055006009 |
| YAL061W   | YAL061W   | -1.264770865 | 18.98705824  | 26.18398032  | -1.379043556 |
| GDH3      | YAL062W   | 1.027028096  | 2.215343462  | 1.569298366  | 1.41167767   |
| FLO9      | YAL063C   | 1.124592074  | -1.278734316 | -1.061636549 | 1.357551086  |
| SEO1      | YAL067C   | -1.225925068 | -1.138992453 | 1.086967683  | -1.238047988 |
| YAL068C   | YAL068C   | 1.102262747  | -1.053709992 | -1.13667812  | 1.078739055  |
| YAL069W   | YAL069W   | 1.255414987  | -1.000486922 | -1.450818521 | 1.451524958  |
| ERP1      | YAR002C-A | 1.251361979  | -1.455265083 | -1.612563838 | 1.108089417  |
| NUP60     | YAR002W   | -1.040894583 | -1.569973023 | -2.0209217   | 1.287233392  |
| SWD1      | YAR003W   | 1.070257515  | -1.647958924 | -1.744016891 | 1.058289054  |
| RFA1      | YAR007C   | -1.170773761 | -1.137098141 | 1.084157627  | 1.048831012  |
| SEN34     | YAR008W   | -1.216404815 | -4.47606285  | -3.84186425  | -1.165075744 |
| BUD14     | YAR014C   | -1.146734396 | -1.40846976  | -1.288545527 | -1.093069458 |
| ADE1      | YAR015W   | -1.187402261 | -2.879169495 | -2.644760006 | -1.088631667 |
| KIN3      | YAR018C   | -1.072792928 | -1.14215752  | -1.059234298 | 1.209812419  |
| CDC15     | YAR019C   | 1.317611157  | 2.429646757  | 1.632677237  | 1.488136603  |
| PAU7      | YAR020C   | 1.117113213  | -1.966549123 | 1.878317262  | 1.046973886  |
| YAR023C   | YAR023C   | 1.146132056  | 2.025067337  | 1.684409776  | 1.202241501  |
| UIP3      | YAR027W   | -1.103934172 | 2.27807824   | 2.812768243  | -1.234710991 |
| YAR028W   | YAR028W   | -1.000540672 | -1.274254347 | -1.285495594 | 1.008821824  |
| YAR029W   | YAR029W   | -1.127280081 | -1.148311345 | 1.04473887   | 1.09913719   |
| YAR030C   | YAR030C   | -1.147013253 | -2.072070994 | -1.704690275 | -1.215511712 |
| PRM9      | YAR031W   | 1.000556345  | -1.623921397 | -1.434063936 | -1.132391211 |
| YAR033W   | YAR033W   | 1.008916271  | -1.062940137 | 1.035562772  | -1.100741235 |
| YAT1      | YAR035W   | 1.087316431  | 2.085706386  | 2.112836983  | -1.013007869 |
| OSH1      | YAR044W   | -1.043933947 | 2.330491082  | 2.452454944  | -1.052333975 |
| FLO1      | YAR050W   | -1.041341205 | -1.226734435 | 1.097112623  | 1.118148136  |
| YAR053W   | YAR053W   | 1.206080683  | -1.527813884 | 1.271531891  | -1.942664078 |
| YAR060C   | YAR060C   | 1.030121182  | -1.715159693 | 1.664301682  | 1.030558168  |
| YAR062W   | YAR062W   | 1.03303943   | -1.115904295 | -1.105656111 | 1.233806403  |
| YAR066W   | YAR066W   | 1.003569788  | -1.655666342 | -1.888669116 | 1.140730513  |
| YAR068W   | YAR068W   | 1.097772269  | -1.037642053 | 1.096638364  | -1.137918085 |

|           |           |              |              |              |              |
|-----------|-----------|--------------|--------------|--------------|--------------|
| YAR069C   | YAR069C   | 1.313882142  | -2.162941325 | -2.1153136   | -1.02251568  |
| PHO11     | YAR071W   | -1.046162169 | -14.59019379 | -12.34567842 | -1.181805753 |
| IMD1      | YAR073W   | 1.183125932  | -5.955849572 | -7.747981558 | 1.30090283   |
| YAR075W   | YAR075W   | 1.304754695  | -2.897461123 | -2.991437517 | 1.032434048  |
| ECM15     | YBL001C   | 1.08001819   | -1.388276559 | 1.249986142  | 1.11063356   |
| HTB2      | YBL002W   | 1.169829782  | -1.998004287 | -1.872954769 | -1.066765904 |
| HTA2      | YBL003C   | -1.212178751 | -4.027613376 | -2.321354984 | -1.735026914 |
| UTP20     | YBL004W   | 1.097568741  | -15.06944241 | -16.13978052 | 1.071027055  |
| PDR3      | YBL005W   | -1.064685366 | -1.039076288 | 1.099779873  | -1.058420721 |
| YBL006C   | YBL006C   | -1.150790025 | -1.20799045  | 1.239882125  | -1.497765767 |
| SLA1      | YBL007C   | 1.200598354  | -1.714376861 | 1.573116932  | 1.089796204  |
| HIR1      | YBL008W   | 1.086889002  | -1.377049202 | -1.367352493 | -1.007091594 |
| YBL009W   | YBL009W   | 1.038745859  | -3.132494369 | -3.47395271  | 1.109005254  |
| YBL010C   | YBL010C   | -1.20593452  | -1.273968426 | -1.239839085 | -1.027527233 |
| SCT1      | YBL011W   | -1.021366651 | -1.123523747 | 1.294538269  | -1.152212645 |
| RRN6      | YBL014C   | 1.055300995  | -1.54495193  | -1.596711039 | 1.033502084  |
| ACH1      | YBL015W   | 1.123834155  | 4.10658402   | 4.151394105  | -1.010911766 |
| FUS3      | YBL016W   | -1.111198136 | -2.250689768 | -2.48200863  | 1.102776875  |
| PEP1      | YBL017C   | 1.114154941  | -1.041163866 | -1.285978995 | 1.235136021  |
| POP8      | YBL018C   | -1.084710942 | -3.971001872 | -3.730494339 | -1.064470686 |
| APN2      | YBL019W   | 1.03925379   | 2.124882676  | 1.584362532  | 1.341159383  |
| RFT1      | YBL020W   | 1.394675539  | -2.091478986 | -2.34810115  | 1.122698896  |
| HAP3      | YBL021C   | -1.484723984 | -1.735194077 | 1.126815783  | -1.955244073 |
| PIM1      | YBL022C   | 1.109426119  | -1.6610447   | 1.272531111  | 1.305307733  |
| MCM2      | YBL023C   | 1.03590951   | -1.188871878 | -1.040455781 | -1.142645272 |
| NCL1      | YBL024W   | -1.243181271 | -6.851134832 | -6.410041215 | -1.068812914 |
| RRN10     | YBL025W   | -1.127843891 | -1.155881015 | -1.263839195 | 1.093399042  |
| LSM2      | YBL026W   | 1.035094426  | -2.834205246 | -2.885457008 | 1.018083292  |
| RPL19B    | YBL027W   | -1.095387843 | -9.215387092 | -9.978995572 | 1.082862334  |
| YBL028C   | YBL028C   | -1.043202571 | -3.67894482  | -4.650592828 | 1.264110514  |
| YBL029C-A | YBL029C-A | -1.132851018 | -1.170014464 | 1.778711122  | -1.520247123 |
| PET9      | YBL030C   | 1.043314788  | -1.380405342 | 1.273793179  | 1.083696604  |
| SHE1      | YBL031W   | -1.260606104 | -1.375274876 | -1.368884846 | -1.004668055 |
| HEK2      | YBL032W   | 1.112681404  | -1.761132951 | -2.012753907 | 1.142874481  |
| RIB1      | YBL033C   | -1.141578138 | -1.516782953 | 1.817045912  | -1.197960399 |
| STU1      | YBL034C   | 1.087314245  | -1.01645887  | -1.251477209 | 1.231212837  |
| POL12     | YBL035C   | -1.11172414  | -3.517245814 | -3.329108825 | -1.056512718 |
| YBL036C   | YBL036C   | -1.234233807 | -1.498552647 | -1.536959221 | 1.025629113  |
| APL3      | YBL037W   | -1.081368588 | -1.244504522 | -1.054323221 | -1.180382352 |
| MRPL16    | YBL038W   | -1.186278881 | -1.210984022 | 1.590015779  | -1.312994846 |
| URA7      | YBL039C   | -1.020307927 | -51.19892135 | -46.58862969 | -1.098957443 |
| ERD2      | YBL040C   | 1.136003977  | -1.162810918 | 1.64250327   | -1.412528249 |
| PRE7      | YBL041W   | -1.133868506 | -1.235901788 | 1.372655903  | -1.11065128  |
| FUI1      | YBL042C   | 1.239023968  | -11.39316696 | -15.44933665 | 1.356017751  |
| YBL044W   | YBL044W   | 1.154521713  | -1.050155527 | -1.184780857 | 1.244204165  |
| COR1      | YBL045C   | 1.056420185  | -1.878444206 | 1.838205505  | 1.021890207  |
| YBL046W   | YBL046W   | -1.145917046 | -1.171107106 | 1.110078818  | -1.300021192 |
| EDE1      | YBL047C   | 1.248495338  | -1.73548094  | 1.425524983  | 1.217432848  |
| YBL048W   | YBL048W   | -1.360971999 | 4.936539765  | 10.06297194  | -2.038466703 |

|           |           |              |              |              |              |
|-----------|-----------|--------------|--------------|--------------|--------------|
| YBL049W   | YBL049W   | 1.106496312  | 5.899623434  | 4.83622793   | 1.219881179  |
| SEC17     | YBL050W   | -1.167184675 | -1.312029594 | 1.296908959  | 1.011658979  |
| PIN4      | YBL051C   | -1.037372469 | -1.253905517 | -1.317553875 | 1.050760091  |
| SAS3      | YBL052C   | -1.128671142 | -2.509074239 | -2.345317145 | -1.069823006 |
| YBL054W   | YBL054W   | -1.22471694  | -14.23083207 | -12.12133581 | -1.174031666 |
| YBL055C   | YBL055C   | -1.134804375 | -2.387460035 | -2.106738263 | -1.133249477 |
| PTC3      | YBL056W   | -1.055462923 | -1.126501021 | 1.119054226  | 1.006654543  |
| YBL057C   | YBL057C   | -1.234333201 | -1.514440149 | -1.104153498 | -1.371584795 |
| SHP1      | YBL058W   | -1.023738459 | -1.660122475 | 1.560934491  | 1.063543975  |
| YBL059C-A | YBL059C-A | -1.136660546 | -1.28840247  | 1.217433337  | 1.058294061  |
| YBL059W   | YBL059W   | -1.177057826 | -1.286695199 | -1.067492419 | -1.205343641 |
| YBL060W   | YBL060W   | -1.087529646 | -1.052183807 | 1.024112443  | 1.027410431  |
| SKT5      | YBL061C   | -1.026209256 | -1.010370748 | -1.17185536  | 1.184008378  |
| KIP1      | YBL063W   | 1.080167182  | -1.092189677 | -1.167737728 | 1.069171182  |
| YBL064C   | YBL064C   | -1.19421318  | 6.507825652  | 8.249331251  | -1.26760176  |
| YBL065W   | YBL065W   | 1.274098465  | -1.999678595 | 1.507146804  | 1.326797489  |
| SEF1      | YBL066C   | 1.172915263  | -1.378024435 | 1.255098284  | 1.097941454  |
| UBP13     | YBL067C   | 1.12240343   | -2.360562756 | -1.764065114 | -1.338138109 |
| PRS4      | YBL068W   | 1.090546913  | -6.882142906 | -6.25535477  | -1.100200254 |
| AST1      | YBL069W   | 1.012067946  | -1.997629204 | -2.578266714 | 1.290663307  |
| KTI11     | YBL071W-A | 1.180147674  | -2.323069034 | -3.097555176 | 1.333389207  |
| RPS8A     | YBL072C   | 1.060356032  | -8.912881003 | -6.939988348 | -1.284278958 |
| SSA3      | YBL075C   | 1.036197903  | 12.44081756  | 17.78882527  | -1.429875906 |
| ILS1      | YBL076C   | 1.090161647  | -3.154225239 | -3.908694144 | 1.239193098  |
| YBL077W   | YBL077W   | -1.051811148 | -2.985503995 | -2.005961688 | -1.488315561 |
| AUT7      | YBL078C   | -1.230878597 | 5.349330322  | 5.370102621  | -1.003883158 |
| NUP170    | YBL079W   | 1.168021541  | -1.703865914 | -2.267262136 | 1.330657604  |
| PET112    | YBL080C   | -1.137396888 | -1.696354272 | 1.633576642  | 1.038429559  |
| YBL081W   | YBL081W   | 1.268169856  | -4.66908002  | -5.292597321 | 1.13354179   |
| RHK1      | YBL082C   | 1.172746582  | -3.270476297 | -3.877444463 | 1.185590144  |
| YBL083C   | YBL083C   | 1.202545845  | -3.754449751 | -4.262864243 | 1.135416513  |
| CDC27     | YBL084C   | 1.172270337  | -1.444717664 | 1.014300915  | 1.424348183  |
| BOI1      | YBL085W   | 1.038010613  | -1.144364221 | 1.046024835  | 1.094012477  |
| YBL086C   | YBL086C   | -1.022247612 | 2.615799387  | 2.255801764  | 1.159587438  |
| RPL23A    | YBL087C   | 1.137385921  | -9.894622757 | -6.67373943  | -1.482620481 |
| TEL1      | YBL088C   | 1.046093299  | -1.076980879 | -1.418619514 | 1.317218849  |
| YBL089W   | YBL089W   | 1.115498435  | -1.116381172 | -1.152802045 | 1.032624047  |
| MRP21     | YBL090W   | -1.225204736 | -1.139616578 | 1.071097433  | 1.063970974  |
| MAP2      | YBL091C   | -1.048219768 | -1.051803425 | -1.013163321 | -1.03813808  |
| YBL091C-A | YBL091C-A | -1.129585179 | -1.830907978 | 1.875694737  | -1.024461502 |
| RPL32     | YBL092W   | -1.255803729 | -6.350842787 | -3.872257339 | -1.640087998 |
| ROX3      | YBL093C   | -1.124096984 | -1.662011891 | -1.955460401 | 1.17656222   |
| YBL094C   | YBL094C   | 1.15843976   | -1.11778163  | -1.226498994 | 1.097261719  |
| YBL095W   | YBL095W   | -1.059161807 | -1.185082031 | 1.468085638  | -1.238805079 |
| YBL096C   | YBL096C   | 1.145514855  | -1.258139044 | -1.04509964  | -1.203846021 |
| BRN1      | YBL097W   | 1.050316923  | -1.098909758 | -1.223546882 | 1.113418888  |
| BNA4      | YBL098W   | -1.072511118 | -1.511384486 | -1.60075921  | 1.05913434   |
| ATP1      | YBL099W   | 1.551126045  | -1.449714984 | -1.221936896 | 1.771460228  |
| YBL100C   | YBL100C   | 1.583596287  | -1.063513021 | -1.013658881 | 1.078039418  |

|           |           |              |              |              |              |
|-----------|-----------|--------------|--------------|--------------|--------------|
| ECM21     | YBL101C   | 1.062936064  | 2.330060693  | 2.351398223  | -1.0091575   |
| SFT2      | YBL102W   | 1.087029926  | -1.423341234 | 1.471392258  | -1.033759314 |
| RTG3      | YBL103C   | -1.077598584 | -1.080342191 | 1.148368402  | -1.062967282 |
| YBL104C   | YBL104C   | 1.027938015  | -1.103993701 | -1.335446241 | 1.209650236  |
| PKC1      | YBL105C   | 1.088017061  | -1.09745023  | -1.027266416 | 1.127373763  |
| SRO77     | YBL106C   | -1.038168758 | -2.221287798 | -2.364687211 | 1.064556881  |
| YBL107C   | YBL107C   | -1.287648806 | -1.278628916 | 1.003757835  | -1.283433794 |
| YBL108C-A | YBL108C-A | 1.027701372  | -1.069247656 | 1.120667372  | -1.19827096  |
| YBL109W   | YBL109W   | 1.276211712  | -1.178570083 | -1.19835779  | 1.41234864   |
| YBL111C   | YBL111C   | 1.342880929  | -1.264971272 | -1.12462431  | -1.12479453  |
| YBL112C   | YBL112C   | 1.349142713  | -1.322873661 | -1.119146392 | -1.182038088 |
| YBL113C   | YBL113C   | -1.004119799 | -1.037640618 | 1.135528073  | -1.094336569 |
| NTH2      | YBR001C   | -1.213496717 | 4.098631121  | 5.00110814   | -1.220189861 |
| RER2      | YBR002C   | -1.173273332 | -1.770494938 | -1.327571507 | -1.33363433  |
| COQ1      | YBR003W   | 1.203358468  | -1.667531561 | 1.605965635  | 1.038335767  |
| YBR004C   | YBR004C   | 1.179658393  | -1.799343595 | -1.965924896 | 1.092578928  |
| YBR005W   | YBR005W   | 1.062780666  | -1.827753956 | 1.701213757  | 1.074382304  |
| UGA2      | YBR006W   | 1.009247521  | 4.692309462  | 5.229889916  | -1.114566283 |
| YBR007C   | YBR007C   | 1.075848073  | -1.506517075 | 1.345611521  | 1.119578015  |
| FLR1      | YBR008C   | 1.356833892  | -1.073241942 | -1.260867485 | 1.353215868  |
| HHF1      | YBR009C   | -1.320854128 | -2.177923331 | -1.812267024 | -1.201767346 |
| HHT1      | YBR010W   | -1.202614946 | -2.356909372 | -2.324441703 | -1.013967943 |
| IPP1      | YBR011C   | -1.110839962 | -1.040402836 | 1.196866416  | -1.245223213 |
| YBR012C   | YBR012C   | -1.061991928 | -1.167967966 | -1.357684812 | 1.162433262  |
| YBR013C   | YBR013C   | -1.120319604 | -1.570402099 | 2.097513786  | -1.335653962 |
| YBR014C   | YBR014C   | -1.098482219 | -1.767300515 | 1.514010378  | 1.167297491  |
| MNN2      | YBR015C   | 1.128660741  | -1.433981271 | -1.527938901 | 1.065522215  |
| YBR016W   | YBR016W   | -1.236190264 | -1.081644756 | 1.446136608  | -1.564206078 |
| KAP104    | YBR017C   | 1.016834205  | -1.334436416 | -1.437230097 | 1.077031532  |
| GAL7      | YBR018C   | -1.165437788 | 3.704642006  | 4.763934493  | -1.285936532 |
| GAL1      | YBR020W   | 1.231791228  | -1.469910079 | -1.080994327 | 1.588964456  |
| FUR4      | YBR021W   | 1.263388805  | -5.933163773 | -7.235338782 | 1.21947397   |
| YBR022W   | YBR022W   | -1.098419324 | -1.07940916  | 1.3771234    | -1.275812223 |
| CHS3      | YBR023C   | 1.258285593  | -1.446402241 | -1.653483511 | 1.143169904  |
| SCO2      | YBR024W   | -1.152020421 | -1.710195184 | 1.743060713  | -1.019217414 |
| YBR025C   | YBR025C   | 1.027623537  | -1.055445456 | -1.149993761 | 1.089581422  |
| MRF1'     | YBR026C   | -1.143014722 | 3.500624786  | 3.237653624  | 1.08122276   |
| YBR028C   | YBR028C   | -1.224663591 | -2.080996273 | -2.029194656 | -1.025528165 |
| CDS1      | YBR029C   | 1.218334263  | -1.141266287 | -1.62785591  | 1.426359412  |
| YBR030W   | YBR030W   | -1.143997468 | -2.806214906 | -2.633471853 | -1.065595176 |
| RPL4A     | YBR031W   | -1.317698694 | -8.503017611 | -5.86136485  | -1.450689017 |
| YBR032W   | YBR032W   | 1.130159191  | -3.688016699 | -6.915464557 | 1.875117474  |
| EDS1      | YBR033W   | -1.421813103 | 5.112019341  | 4.875504302  | 1.048510887  |
| HMT1      | YBR034C   | -1.03273426  | -8.485058815 | -10.48421783 | 1.235609329  |
| PDX3      | YBR035C   | -1.225005097 | -1.5440799   | 1.887446753  | -1.222376351 |
| CSG2      | YBR036C   | 1.169717994  | -1.399089501 | 1.373897972  | 1.018335807  |
| SCO1      | YBR037C   | -1.113773829 | -1.766728293 | 1.920691441  | -1.087145912 |
| CHS2      | YBR038W   | 1.190878433  | -1.143642107 | -1.021395424 | 1.168110814  |
| ATP3      | YBR039W   | -1.05133104  | -1.221727705 | 1.067573396  | 1.144396919  |

|           |           |              |              |              |              |
|-----------|-----------|--------------|--------------|--------------|--------------|
| FIG1      | YBR040W   | 1.098853742  | -8.464266712 | -5.91994213  | -1.42978876  |
| FAT1      | YBR041W   | 1.056412386  | -1.236865819 | -1.392797329 | 1.126069868  |
| YBR042C   | YBR042C   | -1.019932305 | -1.748879101 | -1.484071899 | -1.178432865 |
| AQR2      | YBR043C   | 1.089611941  | -1.377598153 | -1.328587752 | -1.036889096 |
| TCM62     | YBR044C   | -1.153378935 | -1.187666534 | 1.13989737   | 1.041906548  |
| GIP1      | YBR045C   | 1.065780259  | 2.468116234  | 1.243329165  | 1.985086735  |
| ZTA1      | YBR046C   | 1.098948202  | 3.964611903  | 3.168163864  | 1.25139105   |
| YBR047W   | YBR047W   | 1.087992687  | -1.562571182 | 1.199642559  | 1.302530633  |
| RPS11B    | YBR048W   | 1.150676101  | -5.717554002 | -4.595065183 | -1.24428137  |
| REB1      | YBR049C   | -1.041712691 | -1.193521229 | -1.192060306 | -1.001225545 |
| REG2      | YBR050C   | -1.008931489 | -1.014764885 | -1.011782213 | -1.002947938 |
| YBR052C   | YBR052C   | -1.374365439 | 3.307729483  | 4.779146942  | -1.444842139 |
| YBR053C   | YBR053C   | 1.039048259  | 4.843804507  | 4.352486245  | 1.112882209  |
| YRO2      | YBR054W   | 1.420050019  | 38.88937144  | 24.00451539  | 1.620085672  |
| PRP6      | YBR055C   | -1.037704694 | -1.390428696 | -1.605350625 | 1.154572421  |
| YBR056W   | YBR056W   | -1.153614394 | 4.073977582  | 3.933176863  | 1.035798217  |
| MUM2      | YBR057C   | -1.285678711 | -1.02546121  | -1.05928873  | 1.032987616  |
| UBP14     | YBR058C   | -1.033061901 | -1.073240061 | -1.135078719 | 1.218211953  |
| TSC3      | YBR058C-A | -1.004712817 | -1.461575477 | -1.140621102 | -1.28138562  |
| AKL1      | YBR059C   | 1.015116045  | -1.845012345 | 1.918630092  | -1.039900951 |
| ORC2      | YBR060C   | -1.045313016 | -1.49712348  | -1.470808409 | -1.01789157  |
| TRM7      | YBR061C   | 1.007734141  | -4.454309913 | -5.450903805 | 1.22373699   |
| YBR062C   | YBR062C   | -1.429134527 | 2.240318391  | 3.289645641  | -1.46838309  |
| YBR063C   | YBR063C   | -1.083253609 | -1.556659571 | 1.342511079  | 1.159513389  |
| ECM2      | YBR065C   | 1.110597132  | 2.141088655  | 1.467608654  | 1.458896176  |
| NRG2      | YBR066C   | -1.196582029 | -1.228652306 | 1.389233232  | -1.130696801 |
| TIP1      | YBR067C   | 1.176566354  | 3.127103977  | 2.962019674  | 1.055733696  |
| BAP2      | YBR068C   | 1.355039628  | -1.249879411 | -1.210403682 | 1.51285864   |
| TAT1      | YBR069C   | 1.227000445  | -4.836929989 | -6.284295626 | 1.29923229   |
| YBR070C   | YBR070C   | 1.094120393  | -1.225927947 | -1.015642979 | -1.207046149 |
| YBR071W   | YBR071W   | -1.015597397 | -1.119633819 | -1.147902089 | 1.025247782  |
| HSP26     | YBR072W   | -1.486157085 | 91.61835516  | 259.9034172  | -2.836805101 |
| RDH54     | YBR073W   | -1.094710893 | -2.698413397 | -2.435656081 | -1.107879481 |
| YBR074W   | YBR074W   | 1.388931178  | -1.098129494 | -1.46454309  | 1.333670663  |
| YBR075W   | YBR075W   | 1.29430931   | -1.042234563 | -1.510024509 | 1.448833652  |
| YBR077C   | YBR077C   | -1.11277561  | -1.256900944 | 1.466568404  | -1.166813034 |
| ECM33     | YBR078W   | 1.143922943  | -1.681385407 | -2.019660688 | 1.201188423  |
| RPG1      | YBR079C   | 1.176851628  | -2.791483742 | -3.96693812  | 1.421085876  |
| SEC18     | YBR080C   | 1.054688791  | -1.088833274 | -1.022944642 | 1.113816164  |
| SPT7      | YBR081C   | 1.069576048  | -1.048311098 | 1.014591723  | 1.033234427  |
| UBC4      | YBR082C   | 1.011651874  | -1.711259926 | 2.114511956  | -1.235646278 |
| TEC1      | YBR083W   | -1.138977479 | -1.474280016 | 1.222776636  | 1.205682192  |
| RPL19A    | YBR084C-A | -1.150620046 | -5.881837156 | -5.370960137 | -1.095118379 |
| MIS1      | YBR084W   | -1.124303125 | -7.578588047 | -6.947605305 | -1.090820177 |
| YBR085C-A | YBR085C-A | 1.061285546  | 6.422380674  | 11.93182698  | -1.857851098 |
| AAC3      | YBR085W   | -1.155698458 | -2.037223528 | -1.774455865 | -1.148083516 |
| IST2      | YBR086C   | 1.36670404   | -1.008619356 | -1.493552046 | 1.506425503  |
| RFC5      | YBR087W   | -1.135573008 | -1.896465103 | -2.105808892 | 1.110386313  |
| POL30     | YBR088C   | -1.066484641 | -6.212963579 | -5.439399729 | -1.14221493  |

|         |           |              |              |              |              |
|---------|-----------|--------------|--------------|--------------|--------------|
| NHP6B   | YBR089C-A | 1.039234629  | -1.575107566 | 2.171304769  | -1.378512056 |
| YBR090C | YBR090C   | 1.170848949  | -1.347964714 | 2.345664004  | -1.740152379 |
| MRS5    | YBR091C   | -1.183137629 | -2.440074966 | -1.479057004 | -1.649750455 |
| PHO3    | YBR092C   | 1.168307152  | -4.519171655 | -6.088817197 | 1.347330365  |
| PHO5    | YBR093C   | 1.214221182  | -4.592205129 | -4.761427689 | 1.036849957  |
| YBR094W | YBR094W   | -1.13224907  | -1.312278569 | -1.238163994 | -1.059858448 |
| RXT2    | YBR095C   | -1.130247435 | -1.001516251 | -1.039232019 | 1.037658669  |
| YBR096W | YBR096W   | 1.231207581  | -1.467123881 | 1.048357856  | 1.399449504  |
| VPS15   | YBR097W   | 1.138102661  | -1.245985307 | -1.050883784 | 1.309385753  |
| MMS4    | YBR098W   | -1.26218036  | -1.266538892 | 1.668663737  | -1.31749901  |
| YBR099C | YBR099C   | 1.294843321  | -1.727029373 | 1.721497526  | 1.003213392  |
| YBR100W | YBR100W   | -1.044567022 | -1.152615552 | 1.18957689   | -1.032067359 |
| YBR101C | YBR101C   | -1.046653005 | 4.561379017  | 8.509310325  | -1.865512665 |
| EXO84   | YBR102C   | -1.047583688 | -1.300307521 | 1.359902084  | -1.045831129 |
| SIF2    | YBR103W   | -1.101392533 | -1.152122791 | 1.196001774  | -1.038085336 |
| YMC2    | YBR104W   | -1.163467462 | -13.70640317 | -13.48021604 | -1.016779192 |
| VID24   | YBR105C   | -1.039041612 | 2.24317997   | 2.218691543  | 1.011037329  |
| PHO88   | YBR106W   | -1.014728715 | -3.285681489 | -3.184622153 | -1.031733541 |
| IML3    | YBR107C   | -1.153455959 | -1.220029751 | 1.282338003  | -1.051071092 |
| YBR108W | YBR108W   | -1.121332518 | 2.325138156  | 2.269948425  | 1.024313209  |
| CMD1    | YBR109C   | 1.062173178  | -1.014779695 | 1.125550863  | -1.142186162 |
| ALG1    | YBR110W   | 1.156714305  | -1.000261394 | -1.271165149 | 1.271497425  |
| YSA1    | YBR111C   | -1.252020583 | -1.81550903  | 1.900152776  | -1.046622597 |
| CYC8    | YBR112C   | 1.096358354  | -1.129578459 | 1.277642544  | -1.131079061 |
| RAD16   | YBR114W   | 1.041630956  | 3.094874565  | 2.829019925  | 1.093974114  |
| LYS2    | YBR115C   | 1.021685845  | -2.128462035 | -2.006418996 | -1.060826297 |
| YBR116C | YBR116C   | 1.209369193  | 71.23627823  | 90.02431445  | -1.263742531 |
| TKL2    | YBR117C   | 1.3665099    | 36.4853085   | 43.33434124  | -1.187720291 |
| MUD1    | YBR119W   | -1.185798042 | -1.045735083 | 1.007508559  | 1.037941637  |
| CBP6    | YBR120C   | -1.235198034 | -1.025683023 | 1.353235764  | -1.319350845 |
| GRS1    | YBR121C   | -1.070884736 | -3.486572114 | -3.627564781 | 1.040438764  |
| MRPL36  | YBR122C   | -1.02911794  | -1.081593116 | -1.100257504 | 1.190030942  |
| TFC1    | YBR123C   | 1.008294159  | -1.108061384 | -1.1836099   | 1.068180805  |
| PTC4    | YBR125C   | -1.001975536 | -1.197265767 | -1.230506686 | 1.027764027  |
| TPS1    | YBR126C   | 1.041195372  | 9.743357958  | 12.36697988  | -1.269272866 |
| VMA2    | YBR127C   | -1.028858152 | -1.149519879 | -1.125460298 | -1.021377547 |
| APG14   | YBR128C   | 1.15190044   | -1.610326176 | 1.010622599  | 1.593400126  |
| OPY1    | YBR129C   | -1.034642102 | -1.118105376 | -1.718892732 | 1.537326239  |
| SHE3    | YBR130C   | -1.271310958 | -1.346713741 | -1.278929994 | -1.053000357 |
| CCZ1    | YBR131W   | -1.095280445 | -1.22507903  | -1.243366723 | 1.014927766  |
| AGP2    | YBR132C   | 1.316205928  | 5.772355203  | 4.312318366  | 1.338573527  |
| HSL7    | YBR133C   | 1.184007675  | -1.078750289 | -1.438358207 | 1.333356035  |
| CKS1    | YBR135W   | 1.099545736  | -2.075481272 | -1.863137436 | -1.113971107 |
| MEC1    | YBR136W   | -1.080271876 | -1.138115722 | -1.089826273 | 1.240348415  |
| YBR137W | YBR137W   | -1.241549153 | 2.720986343  | 2.950646482  | -1.084403268 |
| HDR1    | YBR138C   | -1.096686885 | -1.520691039 | 1.410990862  | 1.077746908  |
| YBR139W | YBR139W   | 1.150837083  | 6.158735923  | 5.339348974  | 1.153461958  |
| IRA1    | YBR140C   | 1.183121129  | -1.076139654 | -1.137413075 | 1.224015313  |
| YBR141C | YBR141C   | -1.213045021 | -6.150883905 | -6.064956326 | -1.014167881 |

|         |           |              |              |              |              |
|---------|-----------|--------------|--------------|--------------|--------------|
| MAK5    | YBR142W   | -1.093370966 | -13.71708789 | -11.92532277 | -1.150248773 |
| SUP45   | YBR143C   | 1.063246521  | -4.888984595 | -5.900964395 | 1.206991816  |
| ADH5    | YBR145W   | 1.054015692  | -1.008238925 | -1.043379504 | 1.034853424  |
| MRPS9   | YBR146W   | -1.267118169 | -1.140391337 | -1.193081992 | 1.046204012  |
| YBR147W | YBR147W   | 1.214840509  | 9.440416742  | 5.631165202  | 1.676458851  |
| YSW1    | YBR148W   | 1.214046688  | -1.27048085  | -1.034630606 | 1.314478372  |
| ARA1    | YBR149W   | -1.13342905  | 2.757913245  | 3.04942205   | -1.105699049 |
| TBS1    | YBR150C   | -1.014263066 | -1.495117408 | 1.461286055  | 1.023151766  |
| APD1    | YBR151W   | -1.071912703 | -1.23762854  | 1.198292886  | 1.03282641   |
| SPP381  | YBR152W   | -1.056543549 | -1.157335766 | -1.212331337 | 1.047519115  |
| RIB7    | YBR153W   | -1.08519143  | -1.486021603 | -1.543715914 | 1.038824678  |
| RPB5    | YBR154C   | -1.133749739 | -3.214324089 | -3.722414637 | 1.158070728  |
| CNS1    | YBR155W   | -1.048032979 | -4.127824492 | -4.568236742 | 1.106693551  |
| SLI15   | YBR156C   | 1.054498978  | -1.085671225 | -1.170841641 | 1.271149078  |
| ICS2    | YBR157C   | 1.070755748  | -1.462754133 | 1.289207956  | 1.134614572  |
| CST13   | YBR158W   | 1.141830839  | -1.369272815 | -2.164454978 | 1.580733184  |
| YBR159W | YBR159W   | 1.12350605   | -1.275238265 | -1.202931908 | -1.060108438 |
| CDC28   | YBR160W   | 1.006705318  | -1.308637708 | 1.023386923  | 1.2787321    |
| YBR161W | YBR161W   | 1.069619389  | 2.500910769  | 1.93335286   | 1.29356147   |
| TOS1    | YBR162C   | -1.019179979 | -3.104911847 | -2.515189845 | -1.234464211 |
| YSY6    | YBR162W-A | -1.284868746 | -3.478826413 | -1.737871006 | -2.001774814 |
| DEM1    | YBR163W   | 1.032369261  | -1.953193611 | -2.399878165 | 1.228694458  |
| ARL1    | YBR164C   | -1.104277167 | -1.641983863 | -1.891181909 | 1.15176644   |
| UBS1    | YBR165W   | -1.098240242 | -1.123286277 | 1.10791333   | -1.24450384  |
| TYR1    | YBR166C   | -1.11293291  | -1.505159937 | -1.663292309 | 1.105060179  |
| POP7    | YBR167C   | -1.10259764  | -1.342936466 | -1.313662607 | -1.022284154 |
| YBR168W | YBR168W   | 1.194466064  | -1.279269025 | -1.231013214 | 1.574797074  |
| SSE2    | YBR169C   | -1.175764262 | 14.34272128  | 19.23368592  | -1.341006742 |
| NPL4    | YBR170C   | 1.035976494  | -1.812318643 | 1.837772738  | -1.014045044 |
| SEC66   | YBR171W   | 1.039170189  | -1.231311451 | -1.737521266 | 1.411114357  |
| SMY2    | YBR172C   | 1.152776886  | -1.67601706  | -2.702740898 | 1.612597486  |
| UMP1    | YBR173C   | -1.284867715 | -1.160491479 | 1.323873313  | -1.536343699 |
| SWD3    | YBR175W   | 1.016504197  | -1.072004161 | -1.001559002 | -1.070335505 |
| ECM31   | YBR176W   | 1.048434219  | -1.179011156 | -1.217265163 | 1.032445839  |
| EHT1    | YBR177C   | 1.24320844   | 2.993387389  | 2.330766344  | 1.28429321   |
| FZO1    | YBR179C   | -1.023217868 | -1.103108303 | 1.009966556  | 1.092222605  |
| DTR1    | YBR180W   | 1.33526896   | -1.001132041 | -1.262061535 | 1.26349024   |
| RPS6B   | YBR181C   | -1.27230188  | -9.791088539 | -10.00655595 | 1.022006482  |
| SMP1    | YBR182C   | 1.234525795  | -1.301440004 | 1.004379971  | 1.295764593  |
| YPC1    | YBR183W   | 1.158331662  | 6.002218784  | 5.01187151   | 1.197600292  |
| YBR184W | YBR184W   | 1.192317647  | -1.216936193 | -1.483141461 | 1.804888523  |
| MBA1    | YBR185C   | -1.065655383 | -1.227076815 | 1.400191538  | -1.141078962 |
| YBR187W | YBR187W   | 1.157140222  | -2.914930033 | -3.847681282 | 1.319990956  |
| RPS9B   | YBR189W   | -1.179569718 | -23.09920075 | -16.49818941 | -1.400105199 |
| YBR190W | YBR190W   | -1.062438056 | -3.848066386 | -2.721397552 | -1.414003765 |
| RPL21A  | YBR191W   | -1.080688644 | -13.12983037 | -7.556086618 | -1.737649532 |
| RIM2    | YBR192W   | -1.124067468 | -1.499272027 | -2.067135468 | 1.378759445  |
| MED8    | YBR193C   | -1.181176704 | -1.385483221 | 1.681822144  | -1.213888497 |
| YBR194W | YBR194W   | -1.136334334 | -1.231959335 | 1.239436787  | -1.006069561 |



|         |           |              |              |              |              |
|---------|-----------|--------------|--------------|--------------|--------------|
| MSI1    | YBR195C   | -1.045303068 | -1.464790283 | -2.002726868 | 1.36724478   |
| PGI1    | YBR196C   | -1.022972888 | -1.235980293 | 1.041105166  | -1.286785469 |
| YBR197C | YBR197C   | -1.173441055 | -1.456347319 | -1.406950651 | -1.035109026 |
| TAF5    | YBR198C   | -1.091378647 | -1.347413181 | -1.050389842 | -1.282774382 |
| KTR4    | YBR199W   | -1.249417996 | -1.577949669 | 1.790113649  | -1.13445548  |
| BEM1    | YBR200W   | -1.108594293 | -1.034416927 | 1.007911377  | -1.042600589 |
| DER1    | YBR201W   | -1.546878024 | -1.396345155 | 2.425175969  | -1.736802652 |
| CDC47   | YBR202W   | -1.02258126  | -1.908297842 | -2.005493726 | 1.050933288  |
| YBR203W | YBR203W   | -1.000277226 | 3.3551       | 3.332351004  | 1.006826711  |
| YBR204C | YBR204C   | -1.271930384 | 2.156717641  | 1.879464766  | 1.14751693   |
| KTR3    | YBR205W   | 1.031592069  | -1.599335909 | -1.998563078 | 1.249620588  |
| YBR206W | YBR206W   | -1.13296046  | -2.085540181 | -1.597954901 | -1.305130814 |
| FTH1    | YBR207W   | 1.064080573  | -1.185252785 | 1.069424723  | 1.108308757  |
| DUR1,2  | YBR208C   | 1.046413838  | -2.877544771 | -3.298795765 | 1.146392507  |
| YBR210W | YBR210W   | -1.050532508 | -2.351398297 | -1.515051265 | -1.552025566 |
| AME1    | YBR211C   | -1.116758818 | -1.167025788 | 1.065993912  | 1.094777161  |
| NGR1    | YBR212W   | 1.226696281  | 2.170372845  | 1.937301795  | 1.120307043  |
| MET8    | YBR213W   | 1.041095926  | -2.891205204 | -2.730288546 | -1.058937601 |
| SDS24   | YBR214W   | 1.164076947  | 6.696336922  | 6.978304102  | -1.042107675 |
| HPC2    | YBR215W   | -1.195622974 | -1.02248945  | -1.016546178 | 1.039407743  |
| YBR216C | YBR216C   | 1.121951771  | -1.613378639 | 1.311579458  | 1.230103619  |
| APG12   | YBR217W   | -1.280313485 | -1.052682226 | 1.32383407   | -1.257581859 |
| PYC2    | YBR218C   | 1.059921343  | -1.427564181 | -1.35974127  | -1.049879277 |
| YBR220C | YBR220C   | 1.237714045  | -1.787681261 | -2.691768891 | 1.505732007  |
| PDB1    | YBR221C   | 1.023620555  | -1.228173131 | -1.592568588 | 1.296697142  |
| FAT2    | YBR222C   | 1.125090071  | -1.389961384 | 1.060737     | 1.310373243  |
| TDP1    | YBR223C   | -1.022105835 | -1.795127498 | 2.245345654  | -1.2508001   |
| YBR225W | YBR225W   | 1.18529187   | -1.751828357 | 1.508136645  | 1.161584637  |
| MCX1    | YBR227C   | -1.118916224 | -1.012223587 | -1.041948169 | 1.054684513  |
| SLX1    | YBR228W   | -1.12711406  | -1.253936779 | 1.295442836  | -1.033100598 |
| ROT2    | YBR229C   | 1.207160763  | -1.462003183 | 1.233417303  | 1.185327285  |
| YBR230C | YBR230C   | 1.063355682  | 6.088635548  | 7.634054664  | -1.25382027  |
| AOR1    | YBR231C   | -1.04922543  | -1.428324136 | 1.542752458  | -1.080113693 |
| PBP2    | YBR233W   | -1.249086406 | -1.02687432  | 1.17630385   | -1.14551881  |
| DAD3    | YBR233W-A | 1.149596057  | -1.387485173 | -1.771258015 | 1.276595994  |
| ARC40   | YBR234C   | 1.022065502  | -1.275688531 | 1.576177004  | -1.23555003  |
| YBR235W | YBR235W   | 1.194478104  | -1.168201601 | -1.460446042 | 1.250166102  |
| ABD1    | YBR236C   | -1.278101856 | -1.186768449 | 1.495082614  | -1.259793024 |
| PRP5    | YBR237W   | 1.002010225  | -1.331700174 | -1.001418881 | 1.333589698  |
| YBR238C | YBR238C   | 1.335856643  | -4.366300123 | -5.571223316 | 1.275959774  |
| YBR239C | YBR239C   | 1.014731891  | -1.226108575 | -1.290048297 | 1.052148499  |
| THI2    | YBR240C   | 1.50539757   | 2.170441068  | -1.003089087 | 2.17714575   |
| YBR241C | YBR241C   | 1.017549672  | 4.532979589  | 4.817187576  | -1.06269783  |
| YBR242W | YBR242W   | -1.326170318 | -4.375497471 | -4.481099742 | 1.024134917  |
| ALG7    | YBR243C   | 1.616744939  | -1.251587943 | -1.605125113 | 1.282470899  |
| GPX2    | YBR244W   | 1.191348132  | -3.43447066  | -4.461167485 | 1.298938884  |
| ISW1    | YBR245C   | 1.133086993  | -1.347594316 | -1.607167229 | 1.192619477  |
| YBR246W | YBR246W   | 1.249790011  | -1.096575969 | -1.451162124 | 1.323357583  |
| ENP1    | YBR247C   | -1.017296654 | -15.56837769 | -17.98880383 | 1.155470672  |

|         |         |              |              |              |              |
|---------|---------|--------------|--------------|--------------|--------------|
| HIS7    | YBR248C | -1.184494642 | -2.533859715 | -2.113608071 | -1.198831397 |
| ARO4    | YBR249C | 1.068822056  | -3.520256687 | -4.020628758 | 1.142140791  |
| MRPS5   | YBR251W | -1.242218372 | -1.105289719 | 1.013827888  | 1.090214357  |
| DUT1    | YBR252W | 1.015181717  | -3.072767555 | -2.470691777 | -1.243687126 |
| SRB6    | YBR253W | -1.1641417   | -1.038322048 | 1.140506049  | -1.098412628 |
| TRS20   | YBR254C | -1.059857039 | -2.075102325 | -1.873268343 | -1.107744297 |
| YBR255W | YBR255W | -1.02224536  | -1.135693957 | 1.202241961  | -1.058596776 |
| RIB5    | YBR256C | -1.347047165 | -1.295677093 | 1.6331556    | -1.260464979 |
| POP4    | YBR257W | -1.388745157 | -2.253760866 | -1.428739807 | -1.57744668  |
| SHG1    | YBR258C | -1.124450804 | -1.030977245 | 1.10554217   | -1.139788821 |
| YBR259W | YBR259W | -1.296161953 | -1.344442788 | -1.290722484 | -1.041620336 |
| RGD1    | YBR260C | -1.010659558 | -1.2334202   | 1.137903836  | 1.083940629  |
| YBR261C | YBR261C | -1.273684894 | -1.315110095 | -1.185764611 | -1.109081922 |
| YBR262C | YBR262C | -1.072537219 | -1.067380629 | 1.158556276  | -1.236620527 |
| SHM1    | YBR263W | 1.378986529  | -4.040291617 | -4.076778489 | 1.009030752  |
| YPT10   | YBR264C | -1.028248539 | -1.01667343  | 1.097730394  | -1.116033325 |
| TSC10   | YBR265W | 1.123769756  | -1.580750809 | -2.108792809 | 1.334045061  |
| YBR267W | YBR267W | -1.114971232 | -11.78508937 | -14.42062709 | 1.223633239  |
| MRPL37  | YBR268W | -1.265672989 | -2.160797018 | -1.067499963 | -2.024165895 |
| YBR269C | YBR269C | -1.060441557 | 2.774118795  | 2.669762862  | 1.039088092  |
| YBR270C | YBR270C | -1.220990895 | -1.031603319 | 1.073386918  | -1.040503552 |
| YBR271W | YBR271W | 1.045166976  | -3.210567229 | -4.89565469  | 1.524856618  |
| HSM3    | YBR272C | -1.260064652 | -1.477110298 | 1.594829971  | -1.079695926 |
| YBR273C | YBR273C | -1.06191287  | 2.161577842  | 2.309321313  | -1.068349828 |
| CHK1    | YBR274W | 1.269290241  | -1.265298674 | -1.172624824 | 1.483720635  |
| RIF1    | YBR275C | 1.184238891  | -2.437835531 | -2.317219103 | -1.052052232 |
| PPS1    | YBR276C | 1.035162097  | -1.687674082 | -2.07099398  | 1.227129102  |
| DPB3    | YBR278W | -1.272608097 | -1.156998545 | 1.077996748  | -1.247240669 |
| PAF1    | YBR279W | -1.229227279 | -1.43956404  | 1.523792549  | -1.058509734 |
| YBR280C | YBR280C | 1.02926821   | 5.269921141  | 5.498992344  | -1.043467672 |
| YBR281C | YBR281C | 1.01902459   | -1.480312191 | -1.633220922 | 1.103294921  |
| MRPL27  | YBR282W | -1.270470521 | -1.061553583 | 1.730195879  | -1.629871451 |
| SSH1    | YBR283C | 1.370749114  | -2.077859291 | -2.668904578 | 1.284449139  |
| YBR284W | YBR284W | 1.284975338  | 2.583638955  | 1.820762765  | 1.418987143  |
| YBR285W | YBR285W | -1.173288572 | 7.536717513  | 10.21808384  | -1.355773759 |
| APE3    | YBR286W | 1.137952003  | -1.358052911 | 1.520954161  | -1.119952064 |
| YBR287W | YBR287W | 1.710956943  | 2.400157755  | 2.531039444  | -1.054530453 |
| APM3    | YBR288C | -1.085566266 | -1.483382289 | -1.51188727  | 1.019216207  |
| SNF5    | YBR289W | -1.135062799 | -1.032518688 | 1.22711401   | -1.267018148 |
| BSD2    | YBR290W | -1.152104217 | -1.879829118 | 2.195141373  | -1.167734531 |
| CTP1    | YBR291C | 1.158174922  | -1.656065333 | -1.950326253 | 1.177686782  |
| YBR292C | YBR292C | 1.285550704  | -1.680423823 | -1.917758118 | 1.141234784  |
| YBR293W | YBR293W | 1.145646868  | -1.083597378 | -1.22576285  | 1.131197688  |
| PCA1    | YBR295W | 1.059258378  | -1.077488862 | 1.432757609  | -1.329719184 |
| PHO89   | YBR296C | 1.447387452  | -9.145551577 | -11.60043701 | 1.268423988  |
| MAL33   | YBR297W | -1.018730114 | -1.136316173 | -1.066418135 | 1.211788174  |
| MAL31   | YBR298C | 1.360860733  | 3.037919021  | 2.21348721   | 1.372458358  |
| MAL32   | YBR299W | -1.277364654 | 2.641777574  | 2.684327929  | -1.016106714 |
| YBR300C | YBR300C | 1.508325874  | -1.000068389 | -2.241752139 | 2.241598836  |

|           |           |              |              |              |              |
|-----------|-----------|--------------|--------------|--------------|--------------|
| DAN3      | YBR301W   | 1.012188855  | -1.062678831 | 1.129767656  | -1.200580173 |
| COS2      | YBR302C   | 1.098052308  | -1.590008032 | 1.641278821  | -1.032245617 |
| RER1      | YCL001W   | 1.102364959  | -1.505175901 | -1.33072848  | -1.131091672 |
| YCL002C   | YCL002C   | 1.068088771  | -2.25616943  | -2.14139738  | -1.053596802 |
| PGS1      | YCL004W   | 1.172696513  | -1.774505991 | 1.580160942  | 1.122990668  |
| YCL005W   | YCL005W   | 1.158697942  | -1.191646504 | -1.216681994 | 1.021009158  |
| CWH36     | YCL007C   | 1.389734047  | -1.498628401 | -1.594252876 | 1.063807997  |
| STP22     | YCL008C   | -1.080733981 | -1.457244678 | 1.338639442  | 1.088601331  |
| ILV6      | YCL009C   | -1.004320117 | -1.575893784 | -1.387141944 | -1.136072477 |
| SGF29     | YCL010C   | 1.300145581  | -1.531442616 | 1.404696235  | 1.090230455  |
| GBP2      | YCL011C   | 1.087593307  | -1.216043803 | -1.240966329 | 1.02049476   |
| BUD3      | YCL014W   | 1.031003276  | -1.645508303 | -1.52935     | -1.075952727 |
| DCC1      | YCL016C   | -1.149978487 | -1.04025282  | -1.174920386 | 1.129456573  |
| NFS1      | YCL017C   | 1.037565744  | -1.001053742 | 1.155150175  | -1.153934226 |
| YCL021W-A | YCL021W-A | 1.172587429  | -1.364260077 | -1.12685414  | -1.210680273 |
| KCC4      | YCL024W   | 1.115717628  | -1.571175674 | -2.146742133 | 1.366328519  |
| AGP1      | YCL025C   | 1.375119116  | -1.227653872 | -1.172374013 | 1.439269496  |
| FRM2      | YCL026C-A | 1.262064191  | -1.428890514 | -2.198660496 | 1.538718659  |
| YCL027C-A | YCL027C-A | 1.155213204  | 2.371554977  | 3.088075046  | -1.302130912 |
| FUS1      | YCL027W   | -1.128429077 | -1.453917876 | -1.524296957 | 1.048406504  |
| RNQ1      | YCL028W   | -1.080408256 | -1.18282037  | -1.120918694 | -1.055224056 |
| BIK1      | YCL029C   | -1.163100712 | -1.338000116 | -1.322585577 | -1.011654852 |
| HIS4      | YCL030C   | -1.073571731 | -2.019182352 | -1.89821189  | -1.06372864  |
| RRP7      | YCL031C   | -1.250958966 | -1.953309556 | -1.624922274 | -1.202094148 |
| STE50     | YCL032W   | -1.096400421 | -1.11747011  | 1.116538023  | 1.000834801  |
| YCL033C   | YCL033C   | -1.329487483 | -1.077046863 | 1.658317924  | -1.539689666 |
| LSB5      | YCL034W   | -1.186267389 | -1.195500587 | 1.802043015  | -1.507354355 |
| GRX1      | YCL035C   | -1.223544065 | 3.744944793  | 4.860333668  | -1.297838537 |
| GFD2      | YCL036W   | -1.040228279 | -6.422793514 | -6.073579951 | -1.057497154 |
| SRO9      | YCL037C   | 1.101866074  | -9.538264131 | -8.949052884 | -1.065840626 |
| AUT4      | YCL038C   | 1.233918177  | -1.273115108 | -1.335141796 | 1.699789193  |
| YCL039W   | YCL039W   | 1.069220343  | -1.763762024 | 1.469627484  | 1.200142243  |
| GLK1      | YCL040W   | 1.092997332  | 10.57019795  | 13.96994051  | -1.321634711 |
| YCL041C   | YCL041C   | 1.216771077  | -1.606608099 | 2.130329804  | -1.325979749 |
| PDI1      | YCL043C   | 1.012515074  | -1.502386364 | 2.239694451  | -1.490757973 |
| YCL044C   | YCL044C   | 1.369939045  | 2.817483278  | 2.064368872  | 1.364815812  |
| YCL045C   | YCL045C   | 1.169095506  | -1.201574095 | -1.552883791 | 1.292374558  |
| YCL047C   | YCL047C   | 1.001073883  | 2.27561794   | 2.493250843  | -1.095636837 |
| YCL049C   | YCL049C   | -1.042784054 | -1.62836332  | -1.494361273 | -1.089671788 |
| APA1      | YCL050C   | -1.040956055 | 2.372244385  | 3.397990802  | -1.432394918 |
| LRE1      | YCL051W   | 1.085099635  | -1.958470207 | 1.653005155  | 1.184793769  |
| PBN1      | YCL052C   | -1.236624208 | -1.746912479 | 2.408109381  | -1.378494578 |
| SPB1      | YCL054W   | -1.089594621 | -24.25230739 | -30.52130281 | 1.25849068   |
| KAR4      | YCL055W   | -1.313308362 | -1.479360253 | -1.306990375 | -1.131883051 |
| YCL056C   | YCL056C   | 1.06167518   | -1.312963328 | -1.27726158  | -1.02795179  |
| YCL057C-A | YCL057C-A | 1.005217043  | -1.097895905 | 1.281859434  | -1.407348222 |
| PRD1      | YCL057W   | 1.362490333  | -1.542309785 | -1.007649828 | 1.554108189  |
| KRR1      | YCL059C   | -1.081258207 | -8.180367221 | -6.774107775 | -1.207593309 |
| MRC1      | YCL061C   | 1.07305052   | -1.208808002 | -1.410416359 | 1.166782779  |

|               |                |              |              |              |              |
|---------------|----------------|--------------|--------------|--------------|--------------|
| YCL063W       | YCL063W        | -1.103399153 | -1.596229743 | -1.423917523 | -1.121012782 |
| CHA1          | YCL064C        | -1.408045562 | 4.440283421  | 4.734656983  | -1.06629612  |
| HMLALPHA1     | YCL066W        | -1.053740818 | -1.104035642 | 1.134818963  | -1.252880583 |
| HMLALPHA2     | YCL067C        | -1.045092224 | -1.339413364 | 1.590030475  | -1.187109609 |
| YCL068C       | YCL068C        | 1.104025457  | -1.467562029 | 1.101388289  | 1.33246562   |
| YCL073C       | YCL073C        | 1.8220862    | -1.58813309  | -1.255953308 | 1.994621008  |
| CDC10         | YCR002C        | 1.120479462  | -1.009430614 | -1.083412223 | 1.093629465  |
| MRPL32        | YCR003W        | -1.26909991  | -1.619399097 | -1.104413354 | -1.466298004 |
| YCP4          | YCR004C        | -1.038689974 | -1.848865385 | 1.62214122   | 1.139768451  |
| CIT2          | YCR005C        | 1.109074912  | 3.445528106  | 2.308343546  | 1.492640952  |
| YCR006C       | YCR006C        | 1.01606168   | -1.320209908 | 1.131757343  | 1.166513225  |
| YCR007C       | YCR007C        | -1.044267767 | -1.71002702  | 2.250607638  | -1.316124021 |
| SAT4          | YCR008W        | 1.17272118   | -1.656866077 | 1.333876233  | 1.242143787  |
| RVS161        | YCR009C        | -1.140074205 | -1.543604736 | 1.504290371  | 1.026134824  |
| ADY2          | YCR010C        | 1.04730546   | 5.200988691  | 5.128215408  | 1.014190762  |
| ADP1          | YCR011C        | -1.032784136 | 2.29834336   | 2.796693496  | -1.216830151 |
| YCR013C       | YCR013C        | 1.125233982  | -1.220305198 | 1.811245357  | -1.484256037 |
| POL4          | YCR014C        | -1.030466747 | -1.316818836 | -1.789467754 | 1.35893238   |
| YCR015C       | YCR015C        | -1.17159719  | -1.27788936  | 1.283472035  | -1.004368669 |
| YCR016W       | YCR016W        | -1.062575835 | -8.392941668 | -11.10754047 | 1.323438302  |
| CWH43         | YCR017C        | 1.218780576  | -1.664442539 | -2.002141969 | 1.20289041   |
| SRD1          | YCR018C        | 1.008459307  | -1.020499126 | 1.453048737  | -1.423860835 |
| MAK32         | YCR019W        | -1.107470306 | -1.289638118 | -1.12333086  | 1.448690295  |
| PET18         | YCR020C        | -1.0972184   | -1.555632582 | -1.429337898 | -1.088358872 |
| MAK31         | YCR020C-A      | -1.075376443 | -3.764787685 | -1.819647474 | -2.06896541  |
| HSP30         | YCR021C        | -1.074369832 | 50.29460205  | 82.42076836  | -1.638759728 |
| YCR023C       | YCR023C        | 1.205225733  | -1.100508518 | -1.424908685 | 1.294772973  |
| YCR024C       | YCR024C        | 1.132257884  | -1.779153416 | 1.33078918   | 1.336916052  |
| PMP1          | YCR024C-A      | 1.261246945  | -3.472299232 | -3.49797389  | 1.007394138  |
| YCR025C       | YCR025C        | 1.051509868  | -1.393486113 | -1.167707054 | 1.627183564  |
| YCR026C       | YCR026C        | 1.041013305  | -1.291408917 | 1.098840903  | 1.175246493  |
| RHB1          | YCR027C        | 1.109151062  | -1.0940278   | -1.223421481 | 1.118272755  |
| FEN2          | YCR028C        | 1.27654429   | -1.404802009 | -1.776589768 | 1.264654917  |
| RIM1          | YCR028C-A      | 1.238734531  | -1.911077649 | -1.556323789 | -1.22794348  |
| SYP1          | YCR030C        | 1.294228199  | 2.592294974  | 1.733981563  | 1.494995696  |
| <b>RPS14A</b> | <b>YCR031C</b> | 1.198820049  | -5.355618181 | -3.320404195 | -1.612941638 |
| BPH1          | YCR032W        | -1.009322645 | -1.030824208 | -1.056488695 | 1.089054122  |
| SNT1          | YCR033W        | 1.08862396   | -1.240579107 | 1.040380575  | 1.192428172  |
| FEN1          | YCR034W        | 1.251354533  | -4.815594983 | -5.139864675 | 1.06733741   |
| RRP43         | YCR035C        | -1.200687718 | -1.662780222 | -1.586879319 | -1.047830293 |
| RBK1          | YCR036W        | -1.105360312 | -1.555968872 | 1.763445646  | -1.133342497 |
| PHO87         | YCR037C        | 1.060831175  | -1.83891658  | 1.954979373  | -1.063114769 |
| BUD5          | YCR038C        | -1.075536018 | -1.58167079  | 1.540754303  | 1.02655614   |
| MATALPHA2     | YCR039C        | -1.066823058 | -1.309243352 | 1.598184574  | -1.220693289 |
| MATALPHA1     | YCR040W        | -1.112167039 | -1.160930292 | 1.181996411  | -1.372215439 |
| YCR041W       | YCR041W        | 1.272548934  | -1.048661936 | 1.181155618  | -1.126345467 |
| TAF2          | YCR042C        | -1.036424137 | -1.265729299 | 1.525011023  | -1.204847691 |
| YCR043C       | YCR043C        | -1.098469321 | -3.70683684  | -1.528950988 | -2.424431438 |
| PER1          | YCR044C        | 1.175235273  | -1.231315513 | -1.131765641 | -1.087959794 |

|             |                |              |              |              |              |
|-------------|----------------|--------------|--------------|--------------|--------------|
| YCR045C     | YCR045C        | 1.242741055  | 2.523193941  | 2.358782978  | 1.069701606  |
| <b>IMG1</b> | <b>YCR046C</b> | -1.158779185 | -1.363220972 | 1.14020675   | -1.554353754 |
| BUD23       | YCR047C        | 1.096068783  | -9.515895574 | -8.798368228 | -1.081552321 |
| ARE1        | YCR048W        | 1.066043553  | -1.140535647 | -1.019221286 | -1.119026519 |
| YCR050C     | YCR050C        | 1.695417661  | -1.375947233 | -1.870958098 | 2.574339617  |
| YCR051W     | YCR051W        | -1.122756504 | -3.234408518 | -2.955315363 | -1.09443769  |
| RSC6        | YCR052W        | -1.048665961 | -1.589460941 | -1.480910015 | -1.07330015  |
| THR4        | YCR053W        | 1.188444053  | -1.659199044 | -2.312150379 | 1.39353406   |
| CTR86       | YCR054C        | -1.012361619 | -1.885009399 | -2.177190787 | 1.155002616  |
| PWP2        | YCR057C        | -1.077723708 | -25.20902995 | -20.54471679 | -1.227032244 |
| YIH1        | YCR059C        | -1.040409155 | -4.751887805 | -3.68811298  | -1.288433361 |
| YCR060W     | YCR060W        | -1.154000116 | -2.33032083  | -1.540330246 | -1.512870915 |
| YCR061W     | YCR061W        | 1.178413591  | 4.407267048  | 3.646797455  | 1.208530801  |
| BUD31       | YCR063W        | -1.066498931 | -1.782698791 | -2.190395321 | 1.228696251  |
| YCR064C     | YCR064C        | -1.069814086 | -1.866377368 | 3.346973569  | -1.793299482 |
| HCM1        | YCR065W        | 1.175135231  | -1.204914373 | -1.248940203 | 1.036538555  |
| RAD18       | YCR066W        | 1.049863365  | -1.558680298 | 1.053407181  | 1.479656041  |
| SED4        | YCR067C        | 1.143827619  | -1.452985954 | 1.471430959  | -1.012694552 |
| CVT17       | YCR068W        | 1.083243758  | 2.422151896  | 2.547572011  | -1.05178045  |
| CPR4        | YCR069W        | 1.04057737   | -1.284720633 | 1.217997459  | 1.054781044  |
| <b>IMG2</b> | <b>YCR071C</b> | -1.278710004 | -1.082107453 | 1.348635341  | -1.459368353 |
| YCR072C     | YCR072C        | -1.020253868 | -17.80319254 | -26.12480838 | 1.467422672  |
| SSK22       | YCR073C        | -1.072088775 | -1.96717478  | -1.731991709 | -1.135787641 |
| SOL2        | YCR073W-A      | -1.123126322 | 2.07504069   | 2.714136046  | -1.307991723 |
| ERS1        | YCR075C        | -1.025884974 | -1.437219557 | 1.432217463  | 1.003492552  |
| YCR076C     | YCR076C        | -1.044243184 | 2.119772546  | 1.992687249  | 1.063775837  |
| PAT1        | YCR077C        | 1.189375766  | -1.281918639 | -1.227507928 | -1.044326159 |
| YCR079W     | YCR079W        | 1.190692191  | 2.396223379  | 1.970458609  | 1.216073947  |
| SRB8        | YCR081W        | -1.091934689 | -1.122474493 | 1.017320273  | 1.103363929  |
| YCR082W     | YCR082W        | -1.133396417 | -1.154143297 | 1.161352037  | -1.006245966 |
| TRX3        | YCR083W        | 1.171089932  | -1.628053312 | 1.426212528  | 1.141522235  |
| TUP1        | YCR084C        | 1.199978951  | -1.155090374 | -1.375770738 | 1.191050302  |
| CSM1        | YCR086W        | -1.115596153 | -1.163830076 | 1.012159178  | -1.177981294 |
| YCR087C-A   | YCR087C-A      | -1.024875526 | -8.900032257 | -7.527279393 | -1.182370388 |
| ABP1        | YCR088W        | -1.020112259 | -1.481649947 | 1.355961921  | 1.092692888  |
| FIG2        | YCR089W        | 1.339537326  | -2.214989082 | -2.280703052 | 1.029667853  |
| YCR090C     | YCR090C        | -1.281628719 | -1.637673424 | -1.484049109 | -1.103517002 |
| KIN82       | YCR091W        | 1.229422967  | 7.727368696  | 6.309305331  | 1.224757448  |
| MSH3        | YCR092C        | 1.005866748  | -1.340836503 | -1.442837587 | 1.076072723  |
| CDC39       | YCR093W        | 1.141326893  | -1.082875317 | 1.029659098  | 1.051683338  |
| CDC50       | YCR094W        | -1.164809804 | -1.161487236 | -1.352657162 | 1.164590639  |
| YCR095C     | YCR095C        | -1.128851066 | -1.029675251 | -1.052771971 | 1.022431072  |
| HMRA2       | YCR096C        | -1.059811389 | -1.368019284 | 1.609162673  | -1.176271922 |
| HMRA1       | YCR097W        | -1.077050648 | -1.078676318 | 1.530536164  | -1.418902166 |
| YCR097W-A   | YCR097W-A      | 1.218692752  | -1.038495096 | 1.152882064  | -1.19726237  |
| GIT1        | YCR098C        | 1.186928417  | 2.069443306  | 1.406786701  | 1.4710427    |
| YCR099C     | YCR099C        | 1.079612009  | 2.287695421  | 1.991840417  | 1.148533488  |
| YCR100C     | YCR100C        | 1.215849007  | 2.352985878  | 1.710925885  | 1.375270488  |
| YCR101C     | YCR101C        | -1.00060194  | -1.930178105 | 2.271098751  | -1.176626523 |

|         |           |              |              |              |              |
|---------|-----------|--------------|--------------|--------------|--------------|
| YCR102C | YCR102C   | -1.039433576 | -3.005514399 | -1.399436184 | -2.147660917 |
| PAU3    | YCR104W   | 1.000329159  | -1.185909729 | 1.405103664  | -1.184831889 |
| YCR105W | YCR105W   | 1.116709075  | -1.241803246 | 1.175776091  | 1.056156232  |
| RDS1    | YCR106W   | 1.454051369  | -1.328127839 | -1.924000991 | 1.448656473  |
| AAD3    | YCR107W   | -1.016217177 | -1.417324655 | -1.749465615 | 1.234343599  |
| RMD1    | YDL001W   | -1.06847659  | -1.184498498 | -1.279794722 | 1.080452802  |
| NHP10   | YDL002C   | -1.149485399 | -1.041922216 | -1.1079551   | 1.063376021  |
| MCD1    | YDL003W   | -1.204348339 | -2.735986169 | -2.712578202 | -1.008629417 |
| ATP16   | YDL004W   | 1.174990262  | -1.512522122 | 1.613760962  | -1.066933791 |
| MED2    | YDL005C   | -1.215422065 | -1.029490287 | 1.096362159  | -1.128694194 |
| PTC1    | YDL006W   | -1.239944832 | -1.204756185 | -1.080785224 | -1.114704529 |
| RPT2    | YDL007W   | -1.089861363 | -1.638588502 | 1.609361569  | 1.018160575  |
| APC11   | YDL008W   | -1.233209507 | -1.897705071 | -1.237937334 | -1.532957298 |
| YDL010W | YDL010W   | -1.273937336 | -1.44635385  | 1.718446122  | -1.188122894 |
| YDL012C | YDL012C   | -1.030978504 | -1.686293151 | -1.264065946 | -1.334023084 |
| HEX3    | YDL013W   | -1.104171524 | -1.139836992 | 1.136270199  | -1.295162806 |
| NOP1    | YDL014W   | 1.223842447  | -28.80683436 | -39.66058674 | 1.376776992  |
| TSC13   | YDL015C   | 1.356680662  | -1.222775039 | -1.433775685 | 1.753185119  |
| YDL016C | YDL016C   | 1.087837224  | -1.024424886 | -1.779408027 | 1.73698243   |
| CDC7    | YDL017W   | -1.010558529 | -1.3003752   | 1.137578106  | 1.143108498  |
| ERP3    | YDL018C   | -1.105865564 | -1.451147064 | 1.522198039  | -1.04896194  |
| OSH2    | YDL019C   | 1.099533541  | 2.867645629  | 2.395291152  | 1.197201278  |
| RPN4    | YDL020C   | -1.149534803 | 2.422329319  | 2.752744024  | -1.136403709 |
| GPM2    | YDL021W   | -1.251968771 | 15.12536121  | 14.23894111  | 1.062253232  |
| GPD1    | YDL022W   | 1.156680187  | 5.47461302   | 6.312616559  | -1.153070826 |
| YDL023C | YDL023C   | 1.130607986  | 2.865457555  | 2.87638188   | -1.003812419 |
| DIA3    | YDL024C   | 1.437351698  | 9.395474253  | 7.460687347  | 1.259330919  |
| YDL025C | YDL025C   | -1.004514099 | 3.174142533  | 2.737615029  | 1.159455402  |
| YDL026W | YDL026W   | 1.336819254  | 3.175568546  | 1.825241313  | 1.739807511  |
| YDL027C | YDL027C   | -1.027353427 | 2.117623761  | 2.359209363  | -1.114083345 |
| MPS1    | YDL028C   | -1.120392723 | -1.259783574 | 1.245066979  | 1.011819923  |
| ARP2    | YDL029W   | 1.026705863  | -1.265042741 | 1.028242319  | 1.230296319  |
| PRP9    | YDL030W   | -1.206359382 | -1.956474559 | -1.548208813 | -1.26370199  |
| DBP10   | YDL031W   | 1.079427747  | -6.374082106 | -8.511054671 | 1.335259654  |
| YDL033C | YDL033C   | -1.053647286 | -1.148511259 | 1.021220642  | -1.172883406 |
| GPR1    | YDL035C   | -1.021506854 | -1.930773559 | 1.704631087  | 1.132663585  |
| YDL036C | YDL036C   | -1.1472104   | -1.834117817 | -1.868050903 | 1.01850104   |
| YDL038C | YDL038C   | 1.291704232  | -1.56188954  | -2.273689665 | 1.455730131  |
| PRM7    | YDL039C   | 1.33479721   | -1.725148145 | -2.505707548 | 1.452459347  |
| NAT1    | YDL040C   | 1.068461254  | -1.748972109 | -2.540823084 | 1.452752203  |
| SIR2    | YDL042C   | -1.200496081 | -2.084047267 | -2.619735601 | 1.257042314  |
| PRP11   | YDL043C   | -1.249853804 | -1.204452006 | -1.608771206 | 1.335687266  |
| MTF2    | YDL044C   | -1.212852039 | -1.000758152 | 1.20188486   | -1.200974339 |
| FAD1    | YDL045C   | -1.278976208 | -1.197088214 | 1.434886738  | -1.198647453 |
| MRP10   | YDL045W-A | -1.347928166 | -1.799989251 | 1.784689461  | -3.212421846 |
| YDL046W | YDL046W   | 2.080386305  | -1.343139453 | 1.421780102  | -1.058549876 |
| SIT4    | YDL047W   | 1.019045511  | -1.009669737 | -1.286095343 | 1.298531546  |
| STP4    | YDL048C   | 1.222761935  | 2.655014988  | 2.070524227  | 1.282291197  |
| KNH1    | YDL049C   | -1.149747893 | -1.012264152 | -1.007840635 | 1.020200946  |

|           |           |              |              |              |              |
|-----------|-----------|--------------|--------------|--------------|--------------|
| YDL050C   | YDL050C   | 1.019043533  | -2.004058298 | -3.008844476 | 1.501375723  |
| LHP1      | YDL051W   | -1.228312929 | -8.216336463 | -6.099928564 | -1.346956178 |
| SLC1      | YDL052C   | 1.132515675  | -1.032606014 | -1.08205282  | 1.047885453  |
| YDL053C   | YDL053C   | -1.087497465 | -1.192328776 | 1.114630716  | -1.329006278 |
| MCH1      | YDL054C   | 1.047221702  | -1.957997668 | 1.695932811  | 1.154525494  |
| PSA1      | YDL055C   | -1.00737324  | -4.18563007  | -3.964740466 | -1.055713509 |
| MBP1      | YDL056W   | -1.000238286 | -1.214574626 | 1.165730464  | 1.041900048  |
| YDL057W   | YDL057W   | -1.132175498 | 2.239459714  | 2.07723385   | 1.078097063  |
| USO1      | YDL058W   | 1.110667393  | -1.181892154 | -1.389993898 | 1.17607507   |
| RAD59     | YDL059C   | -1.232545098 | -1.088163144 | 1.397107407  | -1.520280789 |
| TSR1      | YDL060W   | 1.02206415   | -21.63711471 | -27.55498969 | 1.273505735  |
| RPS29B    | YDL061C   | 1.407449771  | -9.626176981 | -8.197923393 | -1.174221387 |
| YDL063C   | YDL063C   | 1.011392642  | -27.07736791 | -36.2476732  | 1.338670483  |
| UBC9      | YDL064W   | -1.113640777 | -2.606969242 | -1.7777892   | -1.466410778 |
| PEX19     | YDL065C   | -1.228458551 | -1.034937634 | 1.185154601  | -1.226561098 |
| IDP1      | YDL066W   | 1.204762252  | -1.763762233 | -1.864132268 | 1.056906783  |
| COX9      | YDL067C   | 1.262932173  | -1.024160375 | 1.248004832  | -1.218563872 |
| CBS1      | YDL069C   | -1.047937148 | -1.158626805 | -1.346250959 | 1.16193666   |
| BDF2      | YDL070W   | -1.054640424 | -1.05772987  | 1.143473409  | -1.209485981 |
| YDL071C   | YDL071C   | 1.261615845  | -1.554111977 | 1.103478464  | 1.40837545   |
| YDL072C   | YDL072C   | 1.248811013  | 2.39509377   | 1.858001019  | 1.289070213  |
| YDL073W   | YDL073W   | 1.166874739  | -1.712053029 | -2.283507899 | 1.333783394  |
| BRE1      | YDL074C   | -1.182860899 | -1.927356088 | -1.742637224 | -1.105999609 |
| RPL31A    | YDL075W   | -1.223805392 | -8.22057418  | -4.825633105 | -1.70352242  |
| RXT3      | YDL076C   | -1.040632612 | -1.034063018 | 1.008267378  | 1.025584127  |
| VAM6      | YDL077C   | -1.03501373  | -1.142045456 | -1.02366631  | 1.169073458  |
| MDH3      | YDL078C   | 1.076845308  | -1.072924076 | 1.033173915  | 1.038473834  |
| MRK1      | YDL079C   | -1.072941668 | 4.633809553  | 5.502439872  | -1.187454903 |
| THI3      | YDL080C   | 1.056368796  | -1.175269503 | -1.361821647 | 1.158731375  |
| RPP1A     | YDL081C   | 1.639544718  | -6.200819454 | -5.340692974 | -1.161051475 |
| RPL13A    | YDL082W   | -1.192370486 | -14.69192876 | -12.21299165 | -1.202975421 |
| RPS16B    | YDL083C   | 1.091087209  | -15.77987768 | -11.46141243 | -1.376782991 |
| SUB2      | YDL084W   | -1.001367762 | -2.752142741 | -2.629626932 | -1.046590567 |
| YDL085C-A | YDL085C-A | -1.07363716  | -1.217958014 | 1.092126595  | -1.330164339 |
| NDE2      | YDL085W   | 1.036343707  | 10.66163463  | 13.23902699  | -1.241744577 |
| YDL086W   | YDL086W   | 1.157310619  | -1.278675133 | 1.342998276  | -1.050304524 |
| LUC7      | YDL087C   | 1.028062576  | -1.675322506 | 1.730933711  | -1.033194328 |
| ASM4      | YDL088C   | -1.019611098 | -1.043347335 | 1.153871714  | -1.105932488 |
| YDL089W   | YDL089W   | -1.043026097 | -1.27322672  | -1.009857392 | 1.285777415  |
| RAM1      | YDL090C   | 1.117225367  | -1.199569863 | 1.039999018  | 1.15343365   |
| YDL091C   | YDL091C   | -1.085245546 | -1.969477859 | 2.0206667    | -1.025991072 |
| SRP14     | YDL092W   | 1.066949513  | -1.613042372 | -1.759036049 | 1.090508272  |
| PMT5      | YDL093W   | 1.127178643  | -1.406708503 | -1.596746856 | 1.135094337  |
| PMT1      | YDL095W   | 1.097755401  | -1.175332211 | -1.287480377 | 1.09541827   |
| YDL096C   | YDL096C   | -1.003381434 | -1.06177296  | -1.212104229 | 1.141585136  |
| RPN6      | YDL097C   | -1.16804865  | -1.381926699 | 1.480833082  | -1.071571368 |
| SNU23     | YDL098C   | -1.137876925 | -1.180412798 | -1.023356451 | -1.153471792 |
| YDL099W   | YDL099W   | -1.431471434 | -1.094502598 | 1.802124541  | -1.646523768 |
| ARR4      | YDL100C   | -1.034986244 | -1.083472059 | -1.045603745 | 1.132882443  |

|           |           |              |              |              |              |
|-----------|-----------|--------------|--------------|--------------|--------------|
| DUN1      | YDL101C   | -1.067654765 | -1.60076265  | 1.359292559  | 1.177643944  |
| CDC2      | YDL102W   | -1.046629666 | -1.872403585 | -1.768467055 | -1.058772104 |
| QRI1      | YDL103C   | -1.15070242  | -1.194432475 | 1.12941623   | 1.05756624   |
| QRI7      | YDL104C   | -1.177408327 | -1.025351035 | -1.170419429 | 1.141481687  |
| QRI2      | YDL105W   | -1.194561753 | -1.47465858  | -1.485638492 | 1.007445731  |
| PHO2      | YDL106C   | 1.035597435  | -1.674869981 | 1.352133462  | 1.238686882  |
| MSS2      | YDL107W   | -1.090549652 | -1.753005343 | 1.291093563  | 1.357767859  |
| KIN28     | YDL108W   | -1.049393014 | -1.007921597 | -1.217146807 | 1.226788552  |
| YDL109C   | YDL109C   | 1.398878605  | -1.933247489 | 1.043654703  | 1.85238229   |
| YDL110C   | YDL110C   | -1.220346873 | 5.496923128  | 8.560149085  | -1.557261924 |
| RRP42     | YDL111C   | 1.13455598   | -1.749055469 | -1.491422662 | -1.172742988 |
| TRM3      | YDL112W   | 1.199201287  | -6.548413338 | -8.520202639 | 1.301109475  |
| CVT20     | YDL113C   | -1.231816987 | 2.149960368  | 2.211398433  | -1.02857637  |
| YDL114W-A | YDL114W-A | 1.541779505  | -1.232953623 | -1.85665731  | 1.505861432  |
| IWR1      | YDL115C   | -1.226975085 | -1.860501549 | 2.335479275  | -1.255295529 |
| NUP84     | YDL116W   | 1.009904938  | -1.003730436 | -1.178412952 | 1.182808945  |
| CYK3      | YDL117W   | -1.174631374 | -1.039411782 | 1.06861966   | -1.028100391 |
| YDL119C   | YDL119C   | -1.145290846 | -1.98813112  | 1.680251036  | 1.183234574  |
| YFH1      | YDL120W   | -1.162951947 | -2.0266937   | -1.853598069 | -1.093383585 |
| YDL121C   | YDL121C   | -1.141990462 | -11.33857877 | -8.101961604 | -1.399485621 |
| UBP1      | YDL122W   | -1.089990767 | -2.273418263 | -2.10081109  | -1.082162158 |
| SNA4      | YDL123W   | 1.035864794  | -1.367462036 | 2.132694364  | -1.559600418 |
| YDL124W   | YDL124W   | -1.229764699 | 4.499041423  | 6.24126969   | -1.387244327 |
| HNT1      | YDL125C   | 1.095777134  | -1.094712465 | 1.253219218  | -1.3719147   |
| CDC48     | YDL126C   | -1.106040703 | -1.260267979 | 1.389221535  | -1.102322329 |
| PCL2      | YDL127W   | 1.170346025  | -1.37790233  | -2.297761527 | 1.66757939   |
| VCX1      | YDL128W   | 1.093826239  | -1.114660298 | -1.073726012 | 1.196839757  |
| YDL129W   | YDL129W   | -1.055531665 | -3.167931208 | -2.061027585 | -1.537063954 |
| RPP1B     | YDL130W   | 1.560695711  | -5.071272035 | -4.975488009 | -1.019251181 |
| STF1      | YDL130W-A | -1.042997053 | 3.105285207  | 4.761777482  | -1.533442877 |
| LYS21     | YDL131W   | -1.136721419 | -2.7411502   | -2.441448099 | -1.122755876 |
| CDC53     | YDL132W   | -1.040952311 | -1.449308348 | 1.476922015  | -1.019052997 |
| RPL41B    | YDL133C-A | 1.33205776   | -3.573191562 | -1.552052323 | -2.302236535 |
| YDL133W   | YDL133W   | -1.28116969  | -1.178535284 | 1.104509913  | -1.301703904 |
| PPH21     | YDL134C   | 1.010333649  | -1.008231244 | -1.062163614 | 1.053492063  |
| RDI1      | YDL135C   | -1.273715873 | -1.006988305 | 1.23684819   | -1.228264702 |
| RPL35B    | YDL136W   | -1.061024906 | -6.157755057 | -4.408543188 | -1.396777755 |
| ARF2      | YDL137W   | -1.174223629 | -1.38516696  | -1.049433152 | -1.319919195 |
| RGT2      | YDL138W   | 1.259592619  | -1.760368925 | 1.25332057   | 1.404563978  |
| SCM3      | YDL139C   | -1.132909099 | -1.032022107 | 1.302966178  | -1.26253708  |
| RPO21     | YDL140C   | 1.338157216  | -1.10807088  | -1.189032157 | 1.317531908  |
| BPL1      | YDL141W   | 1.256934807  | -1.136203855 | -1.364364382 | 1.200809499  |
| CRD1      | YDL142C   | 1.038401541  | 2.275386845  | 2.748418023  | -1.207890443 |
| CCT4      | YDL143W   | -1.373515752 | -1.973196848 | -1.354223663 | -1.457068652 |
| YDL144C   | YDL144C   | 1.038837974  | -1.58768068  | 1.524829705  | 1.041218357  |
| COP1      | YDL145C   | 1.13628455   | -1.252119037 | -1.200259542 | -1.043206901 |
| YDL146W   | YDL146W   | 1.249525617  | 2.421344611  | 2.339649182  | 1.034917812  |
| RPN5      | YDL147W   | -1.064728891 | -1.528555671 | 1.580446512  | -1.033947629 |
| NOP14     | YDL148C   | -1.012734506 | -10.78335778 | -18.20884678 | 1.688606383  |



|         |         |              |              |              |              |
|---------|---------|--------------|--------------|--------------|--------------|
| APG9    | YDL149W | -1.037352442 | 2.993000847  | 2.874884229  | 1.041085696  |
| RPC53   | YDL150W | -1.030383077 | -5.554503476 | -5.790150729 | 1.04242454   |
| SAS10   | YDL153C | -1.114036803 | -33.38074277 | -23.32014074 | -1.431412578 |
| MSH5    | YDL154W | 1.062758234  | -1.328240457 | 1.071463839  | 1.239650289  |
| CLB3    | YDL155W | -1.095261538 | -1.356079881 | -1.411195364 | 1.040643243  |
| YDL156W | YDL156W | 1.198439016  | -1.707409267 | -2.055026135 | 1.203593171  |
| YDL157C | YDL157C | -1.091640942 | -3.017404472 | -2.289770677 | -1.317775838 |
| YDL158C | YDL158C | 1.204738795  | -4.602218421 | -4.659954095 | 1.012545184  |
| STE7    | YDL159W | -1.092459877 | -1.266437266 | 1.327346285  | -1.048094778 |
| DHH1    | YDL160C | 1.187495786  | -1.636316196 | 1.697813641  | -1.037582862 |
| ENT1    | YDL161W | -1.109302423 | -1.325016973 | 1.413007251  | -1.066406906 |
| CDC9    | YDL164C | -1.135180486 | -1.705458765 | -1.648100366 | -1.034802735 |
| CDC36   | YDL165W | -1.138269661 | -2.015948485 | -1.355276053 | -1.487481816 |
| FAP7    | YDL166C | -1.254496685 | -4.932651366 | -3.808598413 | -1.295135594 |
| NRP1    | YDL167C | -1.004292129 | -15.22577319 | -22.02761382 | 1.446732035  |
| SFA1    | YDL168W | 1.004504239  | -1.006795138 | 1.077371358  | -1.084692245 |
| UGX2    | YDL169C | -1.138190904 | 4.920037704  | 6.270208404  | -1.274422836 |
| UGA3    | YDL170W | -1.29939186  | -1.152294498 | 1.416126335  | -1.228962159 |
| GLT1    | YDL171C | 1.174517102  | -4.899831445 | -4.827481112 | -1.014987181 |
| YDL172C | YDL172C | -1.131752793 | -1.133870936 | -1.165203359 | 1.321190224  |
| YDL173W | YDL173W | -1.215993453 | -1.0855063   | 1.231468564  | -1.134464687 |
| DLD1    | YDL174C | -1.146563131 | -1.785958813 | 1.831855367  | -1.025698551 |
| AIR2    | YDL175C | -1.256344725 | -1.038450389 | 1.079758755  | -1.121275899 |
| YDL176W | YDL176W | -1.126213702 | -1.26711941  | -1.505682514 | 1.188271999  |
| YDL177C | YDL177C | -1.073594983 | -1.382464459 | -1.31850231  | -1.048511215 |
| DLD2    | YDL178W | -1.176920375 | -1.178650017 | -1.267891667 | 1.07571514   |
| PCL9    | YDL179W | -1.011070483 | -1.274842558 | -1.109668344 | 1.41465243   |
| YDL180W | YDL180W | 1.161644914  | 2.401069464  | 2.336830688  | 1.027489701  |
| INH1    | YDL181W | 1.2630912    | 5.726022527  | 4.833284449  | 1.184706298  |
| LYS20   | YDL182W | -1.006790956 | -4.608774952 | -4.282940684 | -1.076077231 |
| YDL183C | YDL183C | -1.000914599 | -1.583561744 | 1.366036103  | 1.159238574  |
| RPL41A  | YDL184C | 1.368036045  | -3.821946529 | -1.522306103 | -2.510629447 |
| TFP1    | YDL185W | 1.20859691   | -1.117468163 | -1.005109782 | 1.123178182  |
| YDL187C | YDL187C | 1.306211072  | -1.236688673 | -1.855191859 | 1.500128448  |
| PPH22   | YDL188C | 1.01700707   | -1.136359531 | 1.165254052  | -1.02542727  |
| YDL189W | YDL189W | 1.055082045  | -1.853007929 | -2.211849875 | 1.193653756  |
| UFD2    | YDL190C | 1.13759854   | -1.334536715 | 1.262130518  | 1.057368233  |
| RPL35A  | YDL191W | -1.014414001 | -5.516604697 | -4.297724999 | -1.283610444 |
| ARF1    | YDL192W | -1.142383317 | -2.598063391 | -1.664053803 | -1.561285691 |
| YDL193W | YDL193W | -1.176118324 | 2.182943321  | 1.934736676  | 1.128289626  |
| SNF3    | YDL194W | -1.05413738  | -1.770686923 | 1.984132567  | -1.120543977 |
| SEC31   | YDL195W | 1.265418679  | -1.520783891 | 1.260065093  | 1.206908992  |
| ASF2    | YDL197C | -1.009878166 | -1.648759947 | 1.62084525   | 1.017222309  |
| YHM1    | YDL198C | 1.218410925  | -1.813617719 | -2.079128845 | 1.146398618  |
| YDL199C | YDL199C | -1.013424322 | 2.737222763  | 3.464459133  | -1.265684027 |
| MGT1    | YDL200C | -1.227761748 | -1.029758088 | 1.249402025  | -1.213296637 |
| TRM8    | YDL201W | -1.18513379  | -8.429071634 | -10.03525404 | 1.190552705  |
| MRPL11  | YDL202W | -1.195590823 | -1.082786969 | 1.055040886  | -1.142384523 |
| YDL203C | YDL203C | -1.032294138 | -1.304059719 | -1.3599339   | 1.042846336  |

|           |           |              |              |              |              |
|-----------|-----------|--------------|--------------|--------------|--------------|
| YDL204W   | YDL204W   | -1.086451257 | 26.33850956  | 29.73341158  | -1.128894993 |
| HEM3      | YDL205C   | 1.537629556  | -2.041108826 | -2.399795117 | 1.175731096  |
| YDL206W   | YDL206W   | 1.133538379  | -1.581962272 | 1.623413575  | -1.026202459 |
| GLE1      | YDL207W   | 1.048228828  | -1.586596863 | -1.534394391 | -1.034021547 |
| NHP2      | YDL208W   | -1.190211255 | -19.86030554 | -20.03239535 | 1.008665013  |
| CWC2      | YDL209C   | -1.158874329 | -2.240125873 | -2.375476877 | 1.06042116   |
| UGA4      | YDL210W   | 1.242212443  | -1.183518915 | -1.179726288 | 1.396228377  |
| YDL211C   | YDL211C   | 1.010812908  | -2.013519046 | -1.956375251 | -1.029209015 |
| SHR3      | YDL212W   | 1.230874468  | -2.682714454 | -3.382860066 | 1.260984024  |
| FYV14     | YDL213C   | -1.107726635 | -7.705221606 | -8.215082377 | 1.066170812  |
| PRR2      | YDL214C   | 1.182372276  | 3.773530657  | 3.709868636  | 1.017160182  |
| GDH2      | YDL215C   | 1.058632516  | -1.869248628 | 1.908902522  | -1.021213814 |
| RRI1      | YDL216C   | -1.182757227 | 2.247118424  | 2.309147587  | -1.02760387  |
| TIM22     | YDL217C   | -1.134524582 | -1.263452257 | -1.351031671 | 1.069317549  |
| YDL218W   | YDL218W   | 1.201813049  | -1.6906339   | 1.455716263  | 1.161375979  |
| DTD1      | YDL219W   | 1.095974386  | -1.342584647 | -1.399706963 | 1.042546528  |
| CDC13     | YDL220C   | 1.257260404  | -1.062879189 | -1.257444629 | 1.336511727  |
| YDL222C   | YDL222C   | 1.257009903  | 20.16309007  | 24.32087751  | -1.206207851 |
| HBT1      | YDL223C   | 1.147046289  | 10.959136    | 10.3581896   | 1.058016547  |
| WHI4      | YDL224C   | 1.188954919  | -1.367762395 | 1.015954366  | 1.3462833    |
| SHS1      | YDL225W   | -1.04979995  | -1.006435424 | -1.23732503  | 1.229413235  |
| GCS1      | YDL226C   | -1.148596649 | -1.582998981 | -1.511934171 | -1.047002582 |
| HO        | YDL227C   | -1.308848564 | -17.59637685 | -22.3107105  | 1.26791502   |
| YDL228C   | YDL228C   | 1.045274828  | -7.146122321 | -5.14663038  | -1.38850506  |
| SSB1      | YDL229W   | -1.070857353 | -19.3291498  | -17.64019161 | -1.095744889 |
| PTP1      | YDL230W   | -1.10492591  | -1.956228075 | 2.099071707  | -1.073019927 |
| BRE4      | YDL231C   | 1.236772913  | -1.297013087 | -1.392371845 | 1.073521817  |
| OST4      | YDL232W   | 1.257109974  | -1.581805021 | 1.062374897  | -1.680469947 |
| YDL233W   | YDL233W   | -1.122088067 | 2.314227842  | 2.811417355  | -1.214840348 |
| GYP7      | YDL234C   | -1.002726093 | 3.288471821  | 2.847063279  | 1.155039947  |
| YPD1      | YDL235C   | -1.226492347 | -1.515044885 | -1.171517149 | -1.293233211 |
| PHO13     | YDL236W   | 1.087939192  | -2.166419016 | -2.170553918 | 1.001908634  |
| YDL237W   | YDL237W   | 1.295369032  | -1.637484076 | 1.039128617  | 1.575824253  |
| YDL238C   | YDL238C   | 1.128018351  | 5.023736774  | 4.532873635  | 1.108289615  |
| ADY3      | YDL239C   | 1.033004607  | 2.475889396  | 2.355747182  | 1.050999621  |
| LRG1      | YDL240W   | 1.034150282  | -1.516446642 | -1.517450581 | 1.000662034  |
| YDL241W   | YDL241W   | -1.150715325 | -2.87827202  | -2.175142895 | -1.323256521 |
| AAD4      | YDL243C   | 1.091304541  | -1.419493471 | 1.613052921  | -1.136358112 |
| YDL247W   | YDL247W   | 1.460698035  | 2.049198865  | 1.259111724  | 1.62749566   |
| YDL247W-A | YDL247W-A | 1.272721328  | -1.313745608 | -1.072067995 | 1.408424619  |
| COS7      | YDL248W   | 1.486404899  | 2.774153867  | 1.690039057  | 1.641473228  |
| NTH1      | YDR001C   | 1.021043257  | 11.14504658  | 9.694972002  | 1.149569755  |
| YRB1      | YDR002W   | -1.259213707 | -1.086922787 | 1.228648678  | -1.335446245 |
| YDR003W   | YDR003W   | 1.118457157  | 2.01639369   | 2.479488703  | -1.229664978 |
| RAD57     | YDR004W   | -1.141761717 | -1.27360028  | 1.217282308  | 1.046265333  |
| MAF1      | YDR005C   | -1.108595379 | -1.50086812  | 1.440802868  | 1.041688737  |
| SOK1      | YDR006C   | 1.066857241  | -1.15969054  | 1.271936932  | -1.096789952 |
| TRP1      | YDR007W   | -1.05430578  | -1.018951489 | 1.224742784  | -1.247953484 |
| GAL3      | YDR009W   | 1.092104643  | -1.918144263 | 1.107950409  | 1.731254619  |

|           |           |              |              |              |              |
|-----------|-----------|--------------|--------------|--------------|--------------|
| SNQ2      | YDR011W   | 1.122576646  | -1.537493497 | 1.785928361  | -1.161584334 |
| RPL4B     | YDR012W   | -1.248788894 | -6.599879577 | -4.913224232 | -1.343288901 |
| YDR013W   | YDR013W   | 1.041569353  | -2.067496641 | -2.534783748 | 1.226015897  |
| RAD61     | YDR014W   | 1.000546665  | -1.144091981 | -1.178584461 | 1.34840903   |
| DAD1      | YDR016C   | -1.2729219   | -1.702407323 | 1.469132041  | -2.501061146 |
| KCS1      | YDR017C   | -1.045091603 | -1.567310457 | -1.595046448 | 1.017696552  |
| YDR018C   | YDR018C   | 1.155706891  | 5.233870652  | 4.170833769  | 1.254873951  |
| GCV1      | YDR019C   | -1.509318119 | 2.691629845  | 2.831424555  | -1.051936826 |
| YDR020C   | YDR020C   | -1.071964142 | -4.082888762 | -4.208802742 | 1.030839434  |
| FAL1      | YDR021W   | -1.210351191 | -10.58745908 | -7.742382567 | -1.367467829 |
| CIS1      | YDR022C   | -1.184852589 | -1.871493573 | 2.005505697  | -1.071607045 |
| SES1      | YDR023W   | -1.228000743 | -2.450934906 | -2.407554313 | -1.018018531 |
| RPS11A    | YDR025W   | 1.109763212  | -6.913575493 | -5.512231481 | -1.254224449 |
| YDR026C   | YDR026C   | -1.107754345 | -1.586141524 | -1.696567022 | 1.069618943  |
| LUV1      | YDR027C   | -1.050732976 | -1.379076036 | 1.387128745  | -1.005839206 |
| REG1      | YDR028C   | 1.016962606  | -1.757068655 | 1.353535739  | 1.298132443  |
| RAD28     | YDR030C   | -1.292464059 | -1.042138908 | 1.249053506  | -1.301687256 |
| YDR031W   | YDR031W   | -1.163429755 | 2.083884569  | 2.495803145  | -1.197668615 |
| PST2      | YDR032C   | 1.00500399   | 2.601125131  | 3.280917811  | -1.261345628 |
| MRH1      | YDR033W   | 1.058945001  | -1.030794508 | -1.275206118 | 1.314475462  |
| LYS14     | YDR034C   | -1.153773507 | -1.112829494 | -1.204157808 | 1.08206856   |
| YDR034C-A | YDR034C-A | -1.137338667 | -1.21342825  | 1.425537255  | -1.729787177 |
| YDR034W-B | YDR034W-B | -1.474848806 | 8.209764686  | 14.44074958  | -1.75897241  |
| ARO3      | YDR035W   | -1.050019768 | -1.893874199 | -1.813983218 | -1.044041742 |
| YDR036C   | YDR036C   | 1.128868485  | -1.129762085 | -1.280644182 | 1.133552099  |
| KRS1      | YDR037W   | -1.057728191 | -4.720691235 | -5.179412019 | 1.097172376  |
| ENA5      | YDR038C   | 1.0925855    | -1.824361825 | -1.68893587  | -1.08018419  |
| ENA2      | YDR039C   | 1.011842383  | -1.865261684 | 2.812129553  | -1.507632724 |
| ENA1      | YDR040C   | 1.380861804  | 2.555246537  | 1.817578851  | 1.40585182   |
| RSM10     | YDR041W   | -1.154294426 | -1.073087262 | 1.148542283  | -1.07031583  |
| YDR042C   | YDR042C   | 1.226004925  | -1.244887067 | -1.920507271 | 1.54271606   |
| NRG1      | YDR043C   | 1.006479189  | 3.687345553  | 4.198421087  | -1.13860256  |
| HEM13     | YDR044W   | 1.08948539   | -2.039402095 | -1.997629454 | -1.020911106 |
| RPC11     | YDR045C   | -1.057171367 | -4.792647806 | -4.451693305 | -1.076589846 |
| BAP3      | YDR046C   | 1.265961039  | -2.6610656   | -3.405802731 | 1.279864251  |
| HEM12     | YDR047W   | -1.085257124 | -1.323329627 | -1.297703579 | -1.019747228 |
| YDR049W   | YDR049W   | 1.007618968  | -1.301086489 | -1.368319928 | 1.051674841  |
| YDR051C   | YDR051C   | -1.333129718 | -1.22656239  | 1.156572177  | -1.418607935 |
| DBF4      | YDR052C   | -1.259198442 | -1.373804046 | -1.137109453 | -1.208154626 |
| CDC34     | YDR054C   | -1.190366532 | -1.27447434  | 1.436470278  | -1.127108042 |
| PST1      | YDR055W   | 1.008406271  | 4.797957766  | 3.491683332  | 1.374110224  |
| YDR056C   | YDR056C   | -1.153774139 | -1.512367799 | -1.319561392 | -1.146114011 |
| YDR057W   | YDR057W   | -1.181984859 | -1.43286307  | 1.362956702  | 1.051290234  |
| TGL2      | YDR058C   | -1.542780391 | 2.216420886  | 3.136177411  | -1.414973768 |
| UBC5      | YDR059C   | -1.006452097 | -1.620400607 | 2.004864083  | -1.23726446  |
| MAK21     | YDR060W   | -1.027845531 | -33.53046887 | -44.98230229 | 1.341535141  |
| YDR061W   | YDR061W   | -1.286924067 | -1.216887268 | 1.321790161  | -1.086205925 |
| LCB2      | YDR062W   | 1.182561233  | -1.673851102 | -2.110483566 | 1.260855021  |
| YDR063W   | YDR063W   | 1.094367985  | -1.103300313 | 1.015494665  | 1.086465888  |

|           |           |              |              |              |              |
|-----------|-----------|--------------|--------------|--------------|--------------|
| RPS13     | YDR064W   | 1.136619131  | -6.06381043  | -5.083891164 | -1.192749851 |
| YDR065W   | YDR065W   | 1.046140029  | -1.275340544 | -1.129764948 | 1.440835042  |
| YDR066C   | YDR066C   | -1.399723624 | -1.168404312 | 1.576338704  | -1.841800937 |
| YDR067C   | YDR067C   | -1.356498905 | -1.1124953   | 1.630114044  | -1.813494212 |
| DOS2      | YDR068W   | -1.281270594 | -1.025445542 | 1.068735363  | -1.042215622 |
| DOA4      | YDR069C   | 1.015774161  | 2.514141433  | 2.394038634  | 1.050167444  |
| YDR070C   | YDR070C   | -1.02786502  | 14.93707891  | 17.55462622  | -1.175238233 |
| YDR071C   | YDR071C   | -1.424064453 | -1.471416626 | 1.22423462   | -1.801359174 |
| IPT1      | YDR072C   | 1.127865763  | -1.410043937 | -1.305295925 | -1.080248479 |
| SNF11     | YDR073W   | -1.035194119 | -1.081493525 | 1.143022443  | -1.236171371 |
| TPS2      | YDR074W   | -1.047016425 | 10.95489174  | 12.72358568  | -1.161452434 |
| PPH3      | YDR075W   | -1.253941832 | -3.525125238 | -3.186601089 | -1.106233614 |
| SED1      | YDR077W   | 1.152150583  | 3.034334991  | 3.431499575  | -1.130890157 |
| SHU2      | YDR078C   | -1.378503581 | -2.492048932 | -1.652694704 | -1.507870103 |
| YDR079C-A | YDR079C-A | -1.202471845 | -1.618799486 | 1.116006616  | -1.806590936 |
| PET100    | YDR079W   | -1.103304919 | -1.09369919  | 1.207415475  | -1.103974004 |
| VPS41     | YDR080W   | -1.033584842 | -1.412814239 | 1.375419555  | 1.027187838  |
| PDC2      | YDR081C   | 1.063230518  | -1.408825925 | -1.759271887 | 1.248750365  |
| STN1      | YDR082W   | -1.302083387 | -1.092252345 | -1.015380256 | -1.075707686 |
| RRP8      | YDR083W   | -1.018087079 | -21.44129133 | -24.25544192 | 1.131249118  |
| YDR084C   | YDR084C   | 1.169457403  | -1.392920194 | 1.328145854  | 1.048770502  |
| AFR1      | YDR085C   | -1.119189415 | 5.12260756   | 4.821778247  | 1.062389703  |
| SSS1      | YDR086C   | -1.340609757 | -2.809825817 | -1.754198651 | -1.601771735 |
| RRP1      | YDR087C   | -1.20083448  | -17.11090881 | -16.3961788  | -1.043591255 |
| SLU7      | YDR088C   | -1.134814167 | -1.032392549 | 1.032882179  | -1.000474267 |
| YDR089W   | YDR089W   | -1.012602859 | -1.28130768  | 1.027707828  | 1.246762596  |
| YDR090C   | YDR090C   | 1.160120759  | -1.13341809  | -1.330808423 | 1.508362342  |
| RLI1      | YDR091C   | 1.277084299  | -6.344455509 | -11.67306658 | 1.839884693  |
| UBC13     | YDR092W   | -1.307861517 | -1.439923196 | 1.045846219  | -1.505938229 |
| DNF2      | YDR093W   | 1.152187953  | -1.407252791 | -1.988518295 | 1.413049815  |
| YDR094W   | YDR094W   | 1.163842561  | -1.521130035 | -1.648783395 | 1.083920084  |
| GIS1      | YDR096W   | 1.198729399  | 3.780749701  | 3.288156067  | 1.149808471  |
| MSH6      | YDR097C   | 1.167911834  | -3.773918274 | -4.073625461 | 1.079415389  |
| GRX3      | YDR098C   | -1.280201973 | -1.555913439 | -1.544358107 | -1.007482287 |
| BMH2      | YDR099W   | -1.096680957 | -1.39824807  | 1.181240273  | 1.183711817  |
| YDR100W   | YDR100W   | 1.19127971   | 2.2896995    | 2.3050202    | -1.00669114  |
| ARX1      | YDR101C   | -1.086061199 | -39.50052524 | -43.25509871 | 1.095051228  |
| STE5      | YDR103W   | 1.141682833  | -1.427787806 | 1.280784068  | 1.114776363  |
| SPO71     | YDR104C   | 1.051369199  | -1.398989152 | 1.221905724  | 1.14492397   |
| YDR105C   | YDR105C   | -1.066423464 | -1.38700561  | 1.676614553  | -1.208801565 |
| ARP10     | YDR106W   | 1.074334574  | -1.111501652 | -1.850725161 | 1.665067396  |
| YDR107C   | YDR107C   | 1.05608496   | -1.562934009 | 1.418812927  | 1.101578637  |
| GSG1      | YDR108W   | 1.084881743  | -1.059577783 | -1.103223937 | 1.041192025  |
| YDR109C   | YDR109C   | -1.144167371 | -1.321624946 | 1.399939691  | -1.059256407 |
| FOB1      | YDR110W   | 1.089538853  | -2.247919165 | -2.493976918 | 1.109460233  |
| YDR111C   | YDR111C   | 1.260906987  | -3.82563173  | -4.60048865  | 1.202543521  |
| PDS1      | YDR113C   | -1.143940954 | -1.157852889 | -1.052736149 | -1.099850983 |
| YDR115W   | YDR115W   | 1.001973661  | -1.143034396 | 1.535591119  | -1.343433868 |
| YDR116C   | YDR116C   | -1.17477877  | -1.23172943  | 1.246155521  | -1.011712062 |

|         |         |              |              |              |              |
|---------|---------|--------------|--------------|--------------|--------------|
| YDR117C | YDR117C | -1.128072095 | -1.379231679 | -1.432861352 | 1.038883731  |
| APC4    | YDR118W | -1.122504523 | -1.081095913 | -1.12521605  | 1.040810566  |
| YDR119W | YDR119W | 1.038399681  | -3.211515257 | -2.26132814  | -1.420189844 |
| TRM1    | YDR120C | -1.052511559 | -12.71931796 | -14.78202383 | 1.162171107  |
| DPB4    | YDR121W | -1.265297367 | -3.325692001 | -2.98831641  | -1.112898216 |
| KIN1    | YDR122W | 1.051510444  | 2.844184738  | 2.621449816  | 1.084966312  |
| INO2    | YDR123C | -1.256693679 | -1.173476292 | 1.337916432  | -1.570013214 |
| YDR124W | YDR124W | -1.055932462 | -1.335015512 | 1.228610531  | 1.086605949  |
| ECM18   | YDR125C | 1.182925465  | -1.634642417 | 1.689754538  | -1.033715093 |
| SWF1    | YDR126W | 1.03682347   | -1.516819569 | -1.647723848 | 1.086301813  |
| ARO1    | YDR127W | 1.121210465  | -1.789866463 | -1.71570533  | -1.043224866 |
| YDR128W | YDR128W | -1.079077942 | -1.238368309 | -1.095835161 | -1.130068055 |
| SAC6    | YDR129C | 1.042729928  | 2.571696462  | 2.467205027  | 1.042352149  |
| FIN1    | YDR130C | -1.214023875 | -1.269992623 | 1.567048685  | -1.233903771 |
| YDR131C | YDR131C | -1.019817099 | -1.476495268 | 1.535786905  | -1.040157011 |
| YDR132C | YDR132C | -1.095403677 | -1.821624994 | -1.444691611 | -1.260909235 |
| YDR134C | YDR134C | 1.224646541  | -1.718158779 | -1.203076728 | -1.428137323 |
| YCF1    | YDR135C | 1.094937472  | -2.28814254  | -2.263328808 | -1.010963379 |
| RGP1    | YDR137W | -1.284850471 | -1.227468933 | 1.025589027  | -1.258878669 |
| HPR1    | YDR138W | -1.025925608 | -1.353096105 | -1.754363417 | 1.296554924  |
| RUB1    | YDR139C | -1.127174453 | -1.48751493  | -1.028636424 | -1.446103691 |
| FYV9    | YDR140W | -1.255041153 | -1.307207637 | -1.084155338 | -1.205738321 |
| DOP1    | YDR141C | 1.135441407  | -1.516006302 | 1.498580033  | 1.01162852   |
| PEX7    | YDR142C | 1.115040406  | -1.38054871  | 1.021247243  | 1.351826132  |
| SAN1    | YDR143C | 1.0206238    | -1.480016469 | -1.382915402 | -1.070214756 |
| MKC7    | YDR144C | 1.060955621  | -4.824140087 | -5.386524908 | 1.116577216  |
| TAF12   | YDR145W | -1.128132853 | -1.101984838 | -1.117037956 | 1.013660005  |
| SWI5    | YDR146C | 1.091173645  | -1.041843393 | -1.380559835 | 1.325112626  |
| EKI1    | YDR147W | 1.002871098  | -1.178755795 | -1.405902451 | 1.192700351  |
| KGD2    | YDR148C | 1.070275358  | -1.448490633 | 1.449258802  | -1.000530324 |
| NUM1    | YDR150W | 1.019745205  | -1.058272254 | 1.079677021  | -1.020226144 |
| CTH1    | YDR151C | -1.193834415 | -1.721061819 | 2.660520816  | -1.545860111 |
| YDR152W | YDR152W | -1.034013527 | -2.446871884 | -2.586353007 | 1.057003852  |
| YDR153C | YDR153C | 1.004830702  | -1.262733221 | 1.182693597  | 1.067675706  |
| YDR154C | YDR154C | 1.006218949  | -1.042448212 | 1.988540597  | -1.907567756 |
| CPR1    | YDR155C | -1.149946922 | -1.008056919 | 2.113932726  | -2.097037068 |
| RPA14   | YDR156W | 1.077250518  | -2.0977871   | -1.54743912  | -1.355650812 |
| YDR157W | YDR157W | 1.157949116  | -2.293264044 | -1.861624765 | -1.231861591 |
| HOM2    | YDR158W | -1.048151826 | -1.296981082 | 1.012942924  | -1.313767809 |
| SAC3    | YDR159W | -1.0443149   | -1.097370314 | -1.119882348 | 1.020514528  |
| SSY1    | YDR160W | 1.388244578  | -1.224170084 | -1.03132306  | 1.262514837  |
| TCI1    | YDR161W | -1.100856326 | -10.88240609 | -12.14018146 | 1.115578794  |
| NBP2    | YDR162C | -1.280110376 | -1.130015188 | 1.561137714  | -1.381519232 |
| CWC15   | YDR163W | -1.070991559 | -1.022103223 | 1.149183989  | -1.124332615 |
| SEC1    | YDR164C | -1.160183359 | -1.455913266 | -1.388657534 | -1.048432195 |
| TRM82   | YDR165W | -1.190032559 | -14.78092554 | -19.13087547 | 1.294294828  |
| SEC5    | YDR166C | 1.074540743  | -1.582341425 | 1.409013184  | 1.123013925  |
| TAF10   | YDR167W | -1.386392683 | -1.753305584 | -1.097296807 | -1.597840778 |
| CDC37   | YDR168W | -1.035593873 | -1.68377679  | 1.716878459  | -1.019659179 |

|             |                |              |              |              |              |
|-------------|----------------|--------------|--------------|--------------|--------------|
| STB3        | YDR169C        | 1.064605433  | 2.198441062  | 1.814062464  | 1.211888293  |
| SEC7        | YDR170C        | 1.119260187  | -1.541812694 | -1.7323335   | 1.123569358  |
| HSP42       | YDR171W        | -1.148014026 | 34.37886465  | 76.43769701  | -2.223392129 |
| SUP35       | YDR172W        | -1.181140271 | -2.739792232 | -2.654934374 | -1.031962319 |
| ARG82       | YDR173C        | -1.203101269 | -1.271654061 | 1.324274135  | -1.041379236 |
| HMO1        | YDR174W        | -1.042140065 | -1.058153779 | 1.056712637  | 1.001363798  |
| RSM24       | YDR175C        | -1.167866622 | -1.158389773 | -1.148444079 | -1.008660146 |
| NGG1        | YDR176W        | -1.089622199 | -1.053074052 | 1.047249611  | -1.102831392 |
| UBC1        | YDR177W        | -1.108999824 | -1.200209711 | -1.213159078 | 1.010789253  |
| SDH4        | YDR178W        | 1.215174367  | 3.807723325  | 4.598077345  | -1.207566031 |
| CSN9        | YDR179C        | -1.103280037 | -1.763721886 | -1.384123945 | -1.274251408 |
| YDR179W-A   | YDR179W-A      | -1.043943238 | -2.291871064 | -2.158034472 | -1.062017819 |
| SCC2        | YDR180W        | -1.061081419 | -2.257344276 | -2.059740387 | -1.095936309 |
| SAS4        | YDR181C        | -1.281488873 | -1.029575108 | 1.195407508  | -1.230761814 |
| CDC1        | YDR182W        | -1.051838785 | -1.295234247 | 1.309500755  | -1.011014617 |
| PLP1        | YDR183W        | -1.060823079 | -1.042728481 | 1.082380636  | -1.038027306 |
| ATC1        | YDR184C        | -1.117462577 | -5.240884964 | -7.602153377 | 1.450547651  |
| YDR185C     | YDR185C        | 1.151298003  | -2.004160919 | -1.887069003 | -1.062049621 |
| YDR186C     | YDR186C        | -1.022182968 | -1.335730765 | 1.336021405  | -1.000217589 |
| YDR187C     | YDR187C        | -1.272669898 | -1.162518842 | -1.193204249 | 1.026395621  |
| CCT6        | YDR188W        | -1.166811714 | -1.441400769 | -1.148660549 | -1.254853551 |
| SLY1        | YDR189W        | -1.215392366 | -1.181383495 | -1.086202549 | -1.087627254 |
| RVB1        | YDR190C        | -1.007537188 | -2.153431176 | -2.787878703 | 1.294621688  |
| HST4        | YDR191W        | -1.255261016 | -1.007139969 | 1.004956103  | -1.012131459 |
| NUP42       | YDR192C        | 1.076061723  | -1.128542698 | 1.006779447  | 1.120943323  |
| MSS116      | YDR194C        | -1.37775734  | -1.339016332 | -1.107168049 | -1.209406587 |
| REF2        | YDR195W        | -1.204979785 | -1.309491439 | -1.150714287 | -1.137981386 |
| YDR196C     | YDR196C        | -1.137570112 | -1.0784765   | 1.305310977  | -1.210328623 |
| <b>CBS2</b> | <b>YDR197W</b> | -1.292727507 | -1.079848966 | 1.427509781  | -1.321953186 |
| YDR198C     | YDR198C        | -1.126280238 | -2.097043142 | -2.081362514 | -1.007533829 |
| VPS64       | YDR200C        | -1.136746704 | -1.438908063 | 1.47941332   | -1.028149996 |
| SPC19       | YDR201W        | -1.157078404 | -1.116804895 | 1.071192655  | -1.196313201 |
| RAV2        | YDR202C        | -1.307761983 | 2.215119266  | 2.618635213  | -1.182164434 |
| COQ4        | YDR204W        | -1.138943432 | 3.655244776  | 3.691358963  | -1.009880101 |
| MSC2        | YDR205W        | 1.124091732  | -1.215870527 | -1.15022214  | -1.057074529 |
| EBS1        | YDR206W        | -1.0512842   | -1.945267819 | -2.045088128 | 1.05131443   |
| UME6        | YDR207C        | 1.130987959  | -1.163411203 | -1.196944403 | 1.392538528  |
| MSS4        | YDR208W        | 1.006596235  | -1.704782705 | 1.458791965  | 1.168626335  |
| YDR210W     | YDR210W        | -1.256310259 | -1.019332208 | 1.966846217  | -2.004869697 |
| GCD6        | YDR211W        | -1.12866247  | -3.053553733 | -3.092390348 | 1.012718498  |
| TCP1        | YDR212W        | 1.049718201  | -1.391118145 | -1.460602297 | 1.04994842   |
| UPC2        | YDR213W        | -1.116223203 | -1.542231107 | -1.121868428 | -1.374698732 |
| AHA1        | YDR214W        | -1.10059697  | 6.713731961  | 10.80891238  | -1.609970795 |
| ADR1        | YDR216W        | 1.474744119  | 5.480479908  | 4.441753155  | 1.233855127  |
| RAD9        | YDR217C        | 1.017303296  | -1.438083989 | -1.337489068 | -1.075211771 |
| YDR219C     | YDR219C        | -1.371395701 | -1.412992617 | 1.586754639  | -1.122974473 |
| YDR221W     | YDR221W        | -1.087101238 | -1.380455627 | 1.490362458  | -1.079616345 |
| YDR222W     | YDR222W        | 1.041955482  | -2.703912511 | -2.48599171  | -1.087659504 |
| HTB1        | YDR224C        | 1.024269882  | -3.238418294 | -2.595823546 | -1.247549471 |

|             |                |              |              |              |              |
|-------------|----------------|--------------|--------------|--------------|--------------|
| HTA1        | YDR225W        | 1.063347718  | -3.530958172 | -2.625748516 | -1.344743471 |
| ADK1        | YDR226W        | -1.176963425 | -1.964708378 | -1.75430988  | -1.119932346 |
| SIR4        | YDR227W        | -1.032409247 | -1.253337384 | -1.367505154 | 1.091091011  |
| PCF11       | YDR228C        | -1.150111757 | -1.073856285 | -1.299421779 | 1.210051845  |
| YDR229W     | YDR229W        | -1.029535365 | -1.793267714 | 1.798133449  | -1.002713334 |
| YDR230W     | YDR230W        | 1.2322725    | -1.335731494 | 1.350994193  | -1.011426473 |
| COX20       | YDR231C        | -1.266656305 | 2.642786149  | 2.727304164  | -1.031980649 |
| HEM1        | YDR232W        | 1.385259425  | -1.815952268 | -1.650164108 | -1.10046768  |
| YDR233C     | YDR233C        | 1.243420749  | -1.622597252 | -2.096253995 | 1.291912699  |
| LYS4        | YDR234W        | 1.222160151  | -9.175811203 | -11.94622192 | 1.301925427  |
| PRP42       | YDR235W        | -1.080886135 | -1.123414459 | -1.400132791 | 1.246319005  |
| FMN1        | YDR236C        | 1.109193442  | -1.599032976 | 1.549267474  | 1.032121956  |
| MRPL7       | YDR237W        | -1.148391727 | -1.034039337 | -1.043986372 | 1.079522975  |
| SEC26       | YDR238C        | -1.021050097 | -1.008193821 | 1.001142876  | -1.009346061 |
| YDR239C     | YDR239C        | 1.045769468  | -1.318156482 | -1.213871522 | -1.085911036 |
| SNU56       | YDR240C        | -1.000516943 | -1.34683907  | -1.481104549 | 1.099689326  |
| AMD2        | YDR242W        | -1.347688669 | -1.34921249  | 1.957414347  | -1.450782854 |
| PRP28       | YDR243C        | -1.014576668 | -1.222409788 | -1.370564944 | 1.121199255  |
| PEX5        | YDR244W        | -1.091112266 | -1.499865129 | 1.701299587  | -1.134301714 |
| MNN10       | YDR245W        | -1.044469487 | -2.012028229 | -2.23778189  | 1.112202035  |
| TRS23       | YDR246W        | -1.176054146 | -1.847944309 | 1.901136447  | -1.028784492 |
| YDR247W     | YDR247W        | 1.186967964  | 2.588182117  | 1.943542023  | 1.331683126  |
| YDR248C     | YDR248C        | -1.203455666 | -1.359951384 | 1.785166967  | -1.312669694 |
| YDR249C     | YDR249C        | 1.146169198  | -1.039552107 | -1.451167184 | 1.395954253  |
| PAM1        | YDR251W        | 1.021406449  | -1.293721094 | 1.313957753  | -1.015642211 |
| BTT1        | YDR252W        | -1.11127762  | -1.095558188 | 1.057978042  | -1.159076506 |
| MET32       | YDR253C        | -1.101600763 | -1.323753016 | -2.027835721 | 1.53188374   |
| CHL4        | YDR254W        | -1.055195963 | -1.06344893  | -1.313502035 | 1.235134098  |
| RMD5        | YDR255C        | -1.263250782 | 2.947451012  | 3.039389068  | -1.031192395 |
| CTA1        | YDR256C        | 1.134253242  | -1.333650887 | 1.244791776  | 1.07138472   |
| RMS1        | YDR257C        | 1.0404077    | -1.13041433  | -1.784274191 | 1.578424958  |
| HSP78       | YDR258C        | -1.03156805  | 38.435552    | 52.4303718   | -1.364111326 |
| YAP6        | YDR259C        | -1.054486908 | -1.559688217 | 1.186984881  | 1.313991645  |
| SWM1        | YDR260C        | -1.124617706 | -1.534382354 | -1.201347736 | -1.277217502 |
| EXG2        | YDR261C        | 1.061660887  | -1.193778561 | 1.061237415  | 1.12489302   |
| YDR262W     | YDR262W        | 1.098931354  | -1.111854577 | 1.323261896  | -1.190139362 |
| DIN7        | YDR263C        | 1.086972216  | -1.328165042 | -2.095999363 | 1.578116647  |
| AKR1        | YDR264C        | 1.191342856  | -1.283325819 | -1.019433438 | 1.308265254  |
| PEX10       | YDR265W        | -1.168927526 | -1.15959747  | 1.294089147  | -1.115981347 |
| YDR266C     | YDR266C        | -1.075376475 | -1.037497772 | -1.023433707 | -1.013742038 |
| YDR267C     | YDR267C        | -1.166138092 | -2.719086012 | -2.561441456 | -1.06154525  |
| <b>MSW1</b> | <b>YDR268W</b> | -1.389301878 | -1.121574678 | 1.203321557  | -1.072885809 |
| CCC2        | YDR270W        | 1.178772953  | -1.437888185 | 1.139419038  | 1.261948534  |
| GLO2        | YDR272W        | -1.042365272 | 2.74405424   | 2.367241     | 1.159178233  |
| DON1        | YDR273W        | -1.033203419 | -1.64507354  | 1.733141746  | -1.05353451  |
| YDR275W     | YDR275W        | -1.164710405 | -1.418175881 | 2.033908389  | -1.434172175 |
| PMP3        | YDR276C        | 1.195751938  | -1.357467112 | 1.911869698  | -1.408409588 |
| MTH1        | YDR277C        | 1.117681316  | 2.691729167  | 1.881491498  | 1.430635839  |
| YDR279W     | YDR279W        | -1.271284627 | -2.861261454 | -2.366301539 | -1.209170262 |

|         |           |              |              |              |              |
|---------|-----------|--------------|--------------|--------------|--------------|
| RRP45   | YDR280W   | -1.147531976 | -2.296498484 | -2.303205623 | 1.002920594  |
| PHM6    | YDR281C   | 1.098944907  | -15.18500619 | -12.59693199 | -1.205452741 |
| YDR282C | YDR282C   | -1.105498406 | -1.982113249 | 1.826410237  | 1.085250842  |
| GCN2    | YDR283C   | 1.034689829  | -1.217646651 | -1.606949409 | 1.319717348  |
| DPP1    | YDR284C   | 1.143318924  | -1.087938747 | -1.188853389 | 1.293399666  |
| ZIP1    | YDR285W   | -1.215618118 | -1.652205139 | 1.945186155  | -1.177327262 |
| YDR286C | YDR286C   | -1.048920562 | -1.084210106 | 1.340587888  | -1.453478935 |
| YDR287W | YDR287W   | -1.253283491 | -1.979429048 | 2.259064765  | -1.141270897 |
| YDR288W | YDR288W   | -1.18380557  | -1.174140402 | 1.091190317  | 1.076017982  |
| RTT103  | YDR289C   | -1.235220308 | -1.20077457  | 1.535456954  | -1.278722079 |
| YDR291W | YDR291W   | -1.072721361 | -1.017591529 | 1.021261928  | -1.039227487 |
| SRP101  | YDR292C   | -1.064587419 | -1.541484024 | -1.89676866  | 1.230482205  |
| SSD1    | YDR293C   | 1.305178683  | 2.206687297  | 1.739639773  | 1.268473699  |
| DPL1    | YDR294C   | 1.104642865  | -1.392807367 | 1.262117621  | 1.103547993  |
| PLO2    | YDR295C   | -1.068033078 | -1.569868735 | 1.416949013  | 1.107921824  |
| MHR1    | YDR296W   | -1.192008294 | -1.215862282 | 1.416203949  | -1.164773321 |
| SUR2    | YDR297W   | 1.135546063  | -2.144710619 | -2.482033663 | 1.157281379  |
| ATP5    | YDR298C   | 1.164039147  | -1.051022808 | -1.255645906 | 1.194689494  |
| BFR2    | YDR299W   | 1.008714685  | -15.71128112 | -23.18698317 | 1.47581747   |
| PRO1    | YDR300C   | -1.102431174 | -7.542001994 | -7.541099499 | -1.000119677 |
| CFT1    | YDR301W   | 1.060094757  | -1.124885961 | -1.304650878 | 1.159807237  |
| GPI11   | YDR302W   | 1.086339428  | -1.285718571 | -1.424755424 | 1.108139414  |
| RSC3    | YDR303C   | 1.262794941  | -1.096788726 | -1.181692094 | 1.296066567  |
| CPR5    | YDR304C   | -1.118269172 | -1.102182183 | 1.64910692   | -1.496219904 |
| HNT2    | YDR305C   | -1.087715232 | -1.070118591 | -1.046582987 | -1.022488043 |
| YDR306C | YDR306C   | -1.093789837 | -1.817427869 | 2.117666612  | -1.165199813 |
| YDR307W | YDR307W   | 1.216395083  | 2.014404945  | 1.449456041  | 1.389766153  |
| SRB7    | YDR308C   | 1.127192828  | -1.326867467 | -1.75468492  | 1.322426665  |
| GIC2    | YDR309C   | 1.163989295  | -1.504639632 | -1.955362781 | 1.299555548  |
| SUM1    | YDR310C   | 1.228929636  | -1.015857027 | -1.389651173 | 1.367959404  |
| TFB1    | YDR311W   | -1.171418567 | -1.08031989  | 1.196577269  | -1.292686223 |
| SSF2    | YDR312W   | -1.246701615 | -5.250056248 | -4.603803289 | -1.140373712 |
| PIB1    | YDR313C   | 1.081985707  | -1.452231396 | 1.932083969  | -1.330424321 |
| YDR314C | YDR314C   | -1.000149011 | 2.501113956  | 2.859189025  | -1.143166235 |
| IPK1    | YDR315C   | -1.038543898 | -1.000616415 | -1.054092609 | 1.054742368  |
| YDR316W | YDR316W   | -1.092167202 | -1.592955712 | 1.327633972  | 1.199845548  |
| YDR317W | YDR317W   | -2.314257846 | -1.536440827 | 1.001965794  | -1.539461153 |
| MCM21   | YDR318W   | -1.062750408 | -1.056860427 | -1.206016409 | 1.141131202  |
| YDR319C | YDR319C   | 1.212119695  | -1.587244931 | 1.43308693   | 1.107570586  |
| SWA2    | YDR320C   | -1.066075974 | -1.552220563 | 1.565493271  | -1.008550787 |
| HSK2    | YDR320C-A | -1.047202932 | -1.768257908 | -1.103943417 | -1.601764981 |
| ASP1    | YDR321W   | 1.164127359  | -4.238920336 | -4.260552883 | 1.005103315  |
| TIM11   | YDR322C-A | -1.11338787  | -1.03429932  | 1.683641551  | -1.627808814 |
| MRPL35  | YDR322W   | -1.07296726  | -1.032311052 | -1.247849082 | 1.288168399  |
| PEP7    | YDR323C   | -1.141507675 | -1.360947941 | 1.041889424  | 1.306230689  |
| UTP4    | YDR324C   | -1.029233928 | -16.07208608 | -21.87973927 | 1.361350304  |
| YCG1    | YDR325W   | -1.15013078  | -1.376300429 | -1.194202222 | -1.152485236 |
| YDR326C | YDR326C   | 1.129641173  | -1.012617375 | -1.126248945 | 1.112215703  |
| YDR327W | YDR327W   | 1.083459954  | -1.132731517 | 1.00787054   | 1.123885928  |



|           |           |              |              |              |              |
|-----------|-----------|--------------|--------------|--------------|--------------|
| SKP1      | YDR328C   | -1.20747601  | -1.266074437 | 1.27216017   | -1.004806774 |
| PEX3      | YDR329C   | -1.178470134 | -1.961428614 | 2.112592855  | -1.077068438 |
| YDR330W   | YDR330W   | -1.051970467 | 2.304422788  | 2.542127127  | -1.103151358 |
| GPI8      | YDR331W   | 1.04449993   | -1.465118243 | -1.710954828 | 1.167793     |
| YDR332W   | YDR332W   | -1.101927736 | -1.59213556  | 1.176679341  | 1.353075136  |
| YDR333C   | YDR333C   | -1.042735004 | -1.32857382  | -1.586327598 | 1.194007871  |
| SWR1      | YDR334W   | 1.036686179  | -1.424821751 | 1.356510025  | 1.050358439  |
| MSN5      | YDR335W   | 1.120174598  | -1.431033008 | 1.209824821  | 1.182843154  |
| YDR336W   | YDR336W   | -1.154480261 | -1.113216297 | -1.323546871 | 1.188939539  |
| MRPS28    | YDR337W   | -1.170103842 | -1.05458087  | 1.26640794   | -1.200863752 |
| YDR338C   | YDR338C   | 1.233728479  | -1.448300222 | 1.179727541  | 1.227656532  |
| YDR339C   | YDR339C   | -1.145143774 | -3.638515366 | -3.088360585 | -1.178138131 |
| YDR341C   | YDR341C   | 1.039972674  | -2.442951648 | -2.851814295 | 1.167364199  |
| HXT7      | YDR342C   | 1.607670212  | 23.58515322  | 18.46276937  | 1.27744396   |
| HXT6      | YDR343C   | 1.670722654  | 24.07469149  | 16.2871737   | 1.47813807   |
| HXT3      | YDR345C   | 1.030825811  | -9.985310265 | -8.503650754 | -1.174238049 |
| SGI1      | YDR346C   | -1.165689417 | -2.612439558 | -2.565253143 | -1.018394448 |
| MRP1      | YDR347W   | -1.093579439 | -1.042770989 | 1.340140251  | -1.285172166 |
| YDR348C   | YDR348C   | -1.044277636 | -1.150994959 | -1.075690769 | -1.070005426 |
| YPS7      | YDR349C   | 1.161699361  | -1.549262932 | -1.457861091 | -1.062695851 |
| TCM10     | YDR350C   | 1.068592281  | -1.484785053 | 1.349201483  | 1.100491714  |
| SBE2      | YDR351W   | -1.136906847 | -1.153148799 | 1.314799258  | -1.140181787 |
| YDR352W   | YDR352W   | 1.047213384  | -1.270509402 | -1.188582028 | -1.068928665 |
| TRR1      | YDR353W   | 1.051252311  | -1.02496487  | -1.000092197 | -1.024870379 |
| TRP4      | YDR354W   | 1.035261779  | -1.077383854 | -1.177732479 | 1.093141014  |
| SPC110    | YDR356W   | -1.057330351 | -1.12417073  | -1.148265944 | 1.021433768  |
| YDR357C   | YDR357C   | -1.073375158 | -1.090994249 | -1.155463701 | 1.059092384  |
| GGA1      | YDR358W   | -1.284681623 | 3.585334609  | 4.482207843  | -1.250150497 |
| VID21     | YDR359C   | -1.128221952 | -1.103150448 | 1.015004054  | -1.119702177 |
| BCP1      | YDR361C   | -1.190656864 | -12.84152996 | -14.03746558 | 1.093130307  |
| TFC6      | YDR362C   | -1.079711379 | -1.105775788 | 1.084523174  | -1.199239468 |
| ESC2      | YDR363W   | -1.027383398 | -1.332905076 | 1.350510934  | -1.013208636 |
| SEM1      | YDR363W-A | -1.081014204 | -1.389571606 | 1.352776627  | 1.027199596  |
| CDC40     | YDR364C   | -1.024904819 | -1.535927166 | -1.792740077 | 1.167203834  |
| YDR365C   | YDR365C   | -1.088202456 | -1.896701025 | -1.427886516 | -1.328327569 |
| YDR366C   | YDR366C   | 1.09920179   | -1.158558461 | 1.176692634  | -1.015652359 |
| YDR367W   | YDR367W   | 1.095238754  | -1.776433043 | -1.574103117 | -1.128536641 |
| YPR1      | YDR368W   | -1.034352654 | -1.513206348 | 1.664113079  | -1.099726472 |
| XRS2      | YDR369C   | -1.078843953 | -1.413291728 | 1.46399054   | -1.035872857 |
| YDR370C   | YDR370C   | -1.355582319 | -2.768174878 | -2.469367796 | -1.121005498 |
| CTS2      | YDR371W   | -1.181412289 | -1.407319223 | 1.205888227  | 1.167039525  |
| VPS74     | YDR372C   | -1.252059682 | -2.0317901   | -1.920614861 | -1.057885233 |
| FRQ1      | YDR373W   | 1.13170726   | -1.110446154 | -1.027296337 | 1.140757267  |
| BCS1      | YDR375C   | -1.21136281  | -1.065307445 | 1.133016787  | -1.207011218 |
| ARH1      | YDR376W   | 1.034330191  | -1.203883281 | 1.3613546    | -1.130802812 |
| ATP17     | YDR377W   | 1.228292188  | -1.672010099 | 1.731044568  | -1.035307484 |
| LSM6      | YDR378C   | -1.000875415 | -2.599294825 | -1.677169758 | -1.549810216 |
| YDR379C-A | YDR379C-A | 1.264313553  | 3.319197885  | 5.101678076  | -1.537021369 |
| RGA2      | YDR379W   | -1.061231306 | -1.503577141 | 1.610226998  | -1.070930752 |

|               |                |              |              |              |              |
|---------------|----------------|--------------|--------------|--------------|--------------|
| ARO10         | YDR380W        | 1.368720954  | 35.53858802  | 21.43985967  | 1.657594246  |
| YRA1          | YDR381W        | -1.068129406 | -1.609399609 | -1.54314053  | -1.042937812 |
| <b>RPP2B</b>  | <b>YDR382W</b> | 1.043694106  | -6.010752268 | -2.957087776 | -2.0326594   |
| NKP1          | YDR383C        | -1.143381216 | -1.011405945 | -1.050837186 | 1.038986562  |
| YDR384C       | YDR384C        | 1.059735751  | -3.115980973 | -2.689268174 | -1.158672461 |
| EFT2          | YDR385W        | -1.006014295 | -3.981199453 | -3.624834227 | -1.098312144 |
| MUS81         | YDR386W        | -1.04401344  | -1.28471899  | 1.211634895  | 1.060318579  |
| YDR387C       | YDR387C        | 1.324174453  | -1.891096743 | 1.293469293  | 1.462034509  |
| RVS167        | YDR388W        | -1.11615226  | -1.50577428  | 1.618835498  | -1.075085103 |
| SAC7          | YDR389W        | -1.106908756 | -1.077427967 | 1.155604028  | -1.07255804  |
| UBA2          | YDR390C        | -1.101762783 | -1.454749073 | -1.524079065 | 1.047657698  |
| YDR391C       | YDR391C        | -1.036313548 | 3.701964378  | 4.512872446  | -1.219048048 |
| SPT3          | YDR392W        | -1.242837103 | -1.404154682 | 1.72293896   | -1.227029317 |
| SHE9          | YDR393W        | -1.210646398 | -1.009471673 | 1.086346849  | -1.096636371 |
| RPT3          | YDR394W        | -1.091302726 | -1.368522964 | 1.417366109  | -1.035690409 |
| SXM1          | YDR395W        | 1.113065919  | -3.090178558 | -3.559665292 | 1.151928675  |
| YDR396W       | YDR396W        | 1.270593972  | -7.561865668 | -3.361693717 | -2.249421364 |
| NCB2          | YDR397C        | -1.307999993 | -1.917470441 | -1.362805002 | -1.407002791 |
| UTP5          | YDR398W        | -1.128998748 | -24.85033904 | -23.05978782 | -1.077648209 |
| HPT1          | YDR399W        | -1.062109726 | -15.91344377 | -15.04107167 | -1.057999332 |
| URH1          | YDR400W        | 1.051094824  | -1.55478561  | -1.509774466 | -1.029813158 |
| DIT2          | YDR402C        | 1.153229397  | -1.694650795 | 1.323702546  | 1.280235353  |
| DIT1          | YDR403W        | 1.275165369  | -1.459300962 | 1.301090676  | 1.121598202  |
| RPB7          | YDR404C        | 1.060451896  | -1.241850389 | -1.102651043 | -1.126240615 |
| MRP20         | YDR405W        | 1.104587066  | -1.436909491 | -1.180381405 | 1.696101245  |
| PDR15         | YDR406W        | 1.015060875  | 3.730539786  | 3.231551148  | 1.154411493  |
| TRS120        | YDR407C        | -1.077236327 | -1.071184589 | -1.142149461 | 1.066248966  |
| ADE8          | YDR408C        | -1.301805984 | -2.467764674 | -1.554852639 | -1.587137334 |
| SIZ1          | YDR409W        | 1.04754385   | -1.567518684 | 1.288988026  | 1.216084752  |
| STE14         | YDR410C        | 1.308392019  | -1.78648112  | -1.94483984  | 1.088642817  |
| YDR411C       | YDR411C        | 1.191006388  | -1.078819264 | -1.093237221 | 1.179405374  |
| YDR412W       | YDR412W        | -1.013085548 | -7.509772536 | -10.31843232 | 1.374000647  |
| ERD1          | YDR414C        | 1.19282273   | -2.489508118 | -2.798191348 | 1.123993663  |
| YDR415C       | YDR415C        | -1.046112212 | -1.61566006  | 1.513148424  | 1.067747244  |
| SYF1          | YDR416W        | -1.075334822 | -1.332563666 | -1.147759685 | -1.161012783 |
| YDR417C       | YDR417C        | 1.403508576  | -4.455762894 | -4.02525105  | -1.106952793 |
| <b>RPL12B</b> | <b>YDR418W</b> | -1.167900298 | -9.505627273 | -6.199510015 | -1.533286864 |
| RAD30         | YDR419W        | -1.160908616 | -1.493370995 | -1.726327759 | 1.155993898  |
| HKR1          | YDR420W        | 1.154851295  | -1.232077046 | -1.382464672 | 1.122060245  |
| ARO80         | YDR421W        | 1.089159328  | 2.165529272  | 2.054468742  | 1.054058029  |
| SIP1          | YDR422C        | -1.127547684 | -1.418937449 | 1.725074019  | -1.215750576 |
| CAD1          | YDR423C        | -1.211687382 | -1.587621064 | 2.51577005   | -1.584616195 |
| DYN2          | YDR424C        | -1.015710366 | -1.30685284  | 1.18549133   | -1.549262712 |
| YDR425W       | YDR425W        | -1.010822335 | -1.923076704 | 1.61131312   | 1.193484171  |
| RPN9          | YDR427W        | 1.07043232   | -1.348038437 | 1.235405881  | 1.091170487  |
| YDR428C       | YDR428C        | 1.00619339   | -1.507554807 | -1.755474807 | 1.164451732  |
| TIF35         | YDR429C        | -1.166387937 | -4.504707149 | -3.55198766  | -1.268221509 |
| CYM1          | YDR430C        | -1.140609367 | -1.30993086  | 1.665253945  | -1.271253313 |
| NPL3          | YDR432W        | 1.283516303  | -1.44317466  | 1.121954737  | 1.286303817  |

|         |         |              |              |              |              |
|---------|---------|--------------|--------------|--------------|--------------|
| KRE22   | YDR433W | 1.046891469  | -1.079542119 | 1.5361364    | -1.422951799 |
| GPI17   | YDR434W | 1.12078552   | -1.053850432 | -1.098430398 | 1.042301986  |
| PPM1    | YDR435C | 1.150230704  | 2.31196445   | 1.900778498  | 1.216325023  |
| PPZ2    | YDR436W | 1.179686327  | 2.651240818  | 2.576215137  | 1.029122444  |
| YDR437W | YDR437W | 1.493416602  | -1.313677221 | -1.339521915 | 1.759699427  |
| YDR438W | YDR438W | 1.00802575   | -1.055624717 | -1.005565441 | -1.049782215 |
| LRS4    | YDR439W | -1.116949635 | -1.006736746 | -1.086541778 | 1.093861534  |
| DOT1    | YDR440W | -1.159171635 | -2.530522817 | -2.247695461 | -1.125829926 |
| APT2    | YDR441C | 1.113982835  | -3.022770539 | -3.829662213 | 1.266937786  |
| SSN2    | YDR443C | 1.09465477   | -1.378396274 | 1.00578741   | 1.370464833  |
| YDR444W | YDR444W | -1.159739482 | -1.954157625 | -1.626295808 | -1.201600358 |
| RPS17B  | YDR447C | -1.093350215 | -9.108729309 | -7.177816038 | -1.269011251 |
| ADA2    | YDR448W | -1.214634153 | -1.640931316 | 1.100708272  | -1.806186673 |
| UTP6    | YDR449C | -1.074462687 | -16.20349079 | -26.79167069 | 1.653450545  |
| RPS18A  | YDR450W | -1.233072051 | -8.987621744 | -4.591189652 | -1.957580155 |
| YHP1    | YDR451C | -1.261944508 | -1.3653123   | -1.679771559 | 1.230320389  |
| PPN1    | YDR452W | -1.015207567 | -1.063654922 | 1.092385608  | -1.027011285 |
| TSA2    | YDR453C | 1.093135389  | 10.33094362  | 9.800077308  | 1.054169605  |
| GUK1    | YDR454C | -1.117269563 | -3.302375323 | -2.404678444 | -1.373312649 |
| NHX1    | YDR456W | 1.29558811   | -1.245252989 | -1.788277454 | 1.436075616  |
| TOM1    | YDR457W | 1.164533524  | -1.071885827 | -1.171076153 | 1.092538145  |
| YDR458C | YDR458C | -1.079008425 | -1.131516329 | 1.119586082  | 1.010655945  |
| YDR459C | YDR459C | 1.194903772  | -1.122115484 | -1.503883881 | 1.340222202  |
| TFB3    | YDR460W | -1.159933021 | -1.118028599 | 1.262630302  | -1.129336318 |
| MFA1    | YDR461W | 1.108455028  | -2.536479151 | -1.555483782 | -1.630668979 |
| MRPL28  | YDR462W | -1.198985186 | -1.308899716 | 1.502670404  | -1.148040897 |
| STP1    | YDR463W | -1.222054866 | -1.12617564  | 1.21783482   | -1.081389773 |
| SPP41   | YDR464W | 1.03161403   | -1.565902881 | -1.569335225 | 1.002191927  |
| RMT2    | YDR465C | -1.240657338 | -30.41075337 | -19.70574493 | -1.543243023 |
| YDR466W | YDR466W | -1.017757129 | -1.374661905 | 1.368721856  | 1.004339852  |
| YDR467C | YDR467C | 1.101352375  | -1.500123575 | -1.835529973 | 1.223585846  |
| TLG1    | YDR468C | -1.141156524 | -1.223804754 | 1.488584016  | -1.216357438 |
| SDC1    | YDR469W | -1.047553658 | -1.552751182 | -1.461726497 | -1.062272036 |
| UGO1    | YDR470C | -1.012739759 | -1.290802842 | 1.248053211  | 1.034253052  |
| RPL27B  | YDR471W | 1.04037509   | -20.02726103 | -18.38821355 | -1.089135765 |
| TRS31   | YDR472W | -1.162255256 | -2.269030525 | -1.782362615 | -1.27304652  |
| PRP3    | YDR473C | -1.219835001 | -1.051324728 | 1.303101992  | -1.239485726 |
| YDR474C | YDR474C | -1.037382197 | 2.874681502  | 3.32675533   | -1.157260493 |
| JIP4    | YDR475C | 1.4336407    | 2.063867683  | 1.972053247  | 1.046557787  |
| YDR476C | YDR476C | -1.000121861 | -1.168190822 | 1.388642251  | -1.188711831 |
| SNF1    | YDR477W | 1.096443513  | -1.017996975 | -1.035379079 | 1.05401277   |
| YDR479C | YDR479C | -1.014351536 | 2.110629375  | 2.675029072  | -1.267408245 |
| DIG2    | YDR480W | -1.107639298 | -1.012229146 | 1.010160428  | 1.00204791   |
| PHO8    | YDR481C | -1.025794978 | -1.37011564  | -1.309042863 | -1.046654528 |
| CWC21   | YDR482C | -1.095496145 | -1.086685118 | 1.027950619  | -1.11705864  |
| KRE2    | YDR483W | 1.091284442  | -1.543122522 | -1.569526633 | 1.017110833  |
| SAC2    | YDR484W | -1.153833691 | -1.306103534 | 1.168104322  | 1.11813946   |
| VPS72   | YDR485C | -1.032357207 | -1.170412664 | 1.201261236  | -1.026357004 |
| VPS60   | YDR486C | -1.131788116 | -1.054991366 | -1.01218253  | 1.06784383   |

|         |           |              |              |              |              |
|---------|-----------|--------------|--------------|--------------|--------------|
| RIB3    | YDR487C   | 1.044912423  | -2.291573355 | -1.967378359 | -1.164785281 |
| PAC11   | YDR488C   | 1.055176599  | -1.907392502 | -1.361554898 | -1.400892836 |
| YDR489W | YDR489W   | 1.043029167  | -1.188713152 | -1.171980838 | -1.014276952 |
| PKH1    | YDR490C   | -1.009164278 | -1.98667612  | 2.044469855  | -1.029090668 |
| YDR492W | YDR492W   | 1.25032361   | -5.702899852 | -8.23977247  | 1.444839061  |
| YDR493W | YDR493W   | -1.054183485 | -1.054366869 | 1.087454358  | -1.146575847 |
| RSM28   | YDR494W   | -1.236854453 | -1.554429852 | 1.343848507  | 1.156700211  |
| VPS3    | YDR495C   | -1.221502493 | -1.267009214 | 1.389296078  | -1.09651616  |
| PUF6    | YDR496C   | -1.068010791 | -27.1577609  | -34.30383425 | 1.263131905  |
| ITR1    | YDR497C   | 1.396156142  | -1.52155917  | -1.14421142  | 1.740985378  |
| SEC20   | YDR498C   | -1.122941906 | -1.048565082 | -1.097524781 | 1.046692093  |
| LCD1    | YDR499W   | -1.082166454 | -1.077273132 | -1.175519429 | 1.266355497  |
| RPL37B  | YDR500C   | -1.016952675 | -10.68139823 | -7.737739352 | -1.380428798 |
| PLM2    | YDR501W   | -1.13464488  | -1.188091282 | -1.04267704  | -1.139462401 |
| SAM2    | YDR502C   | -1.030950162 | -2.848594346 | -3.678875468 | 1.291470466  |
| LPP1    | YDR503C   | 1.016646329  | -1.697766721 | 1.913940825  | -1.127328509 |
| YDR504C | YDR504C   | 1.110401809  | 2.496845441  | 2.152581083  | 1.15993096   |
| PSP1    | YDR505C   | 1.210795787  | 3.133302279  | 2.477315716  | 1.264797321  |
| YDR506C | YDR506C   | -1.129539313 | 2.257595092  | 2.916475325  | -1.291850489 |
| GIN4    | YDR507C   | -1.107340238 | -2.600245156 | -2.537675992 | -1.024656088 |
| GNP1    | YDR508C   | 1.304994688  | -1.087711879 | -1.201797278 | 1.307209175  |
| YDR509W | YDR509W   | 1.13672934   | -1.380713744 | -1.036287549 | -1.332365467 |
| SMT3    | YDR510W   | -1.052778794 | -1.198881312 | -1.062737071 | -1.128107172 |
| ACN9    | YDR511W   | 1.056786461  | -1.646465762 | 1.893974807  | -1.150327478 |
| EMI1    | YDR512C   | -1.143498487 | -1.48521229  | 2.173104436  | -1.463160823 |
| TTR1    | YDR513W   | 1.287458865  | 3.237021029  | 3.074544767  | 1.052845632  |
| YDR514C | YDR514C   | -1.034862385 | -2.955434291 | -3.037088504 | 1.027628499  |
| SLF1    | YDR515W   | -1.060213383 | -1.159035506 | -1.113292734 | 1.290345808  |
| EMI2    | YDR516C   | 1.084123529  | 5.946635153  | 6.640130493  | -1.11661979  |
| GRH1    | YDR517W   | -1.103448908 | -1.484871567 | 1.989757489  | -1.340019927 |
| EUG1    | YDR518W   | 1.145807464  | -1.022303849 | -1.097007881 | 1.121475378  |
| FPR2    | YDR519W   | 1.320074321  | -1.08089336  | -1.022517638 | -1.057090187 |
| YDR520C | YDR520C   | -1.041108445 | -1.20497179  | -1.151555748 | -1.04638598  |
| AGE1    | YDR524C   | 1.106949847  | -2.860482143 | -3.524258826 | 1.23205063   |
| SNA2    | YDR525W-A | -1.019602195 | -1.172540744 | -1.117634035 | -1.049127628 |
| YDR527W | YDR527W   | -1.024715467 | -2.132889419 | -2.721095328 | 1.275778905  |
| HLR1    | YDR528W   | -1.015644266 | -2.067601517 | -1.879152356 | -1.100284131 |
| QCR7    | YDR529C   | 1.19387635   | -1.964024382 | 1.934630957  | 1.015193298  |
| APA2    | YDR530C   | 1.136270621  | -1.131077891 | 1.205101951  | -1.065445589 |
| YDR531W | YDR531W   | -1.158657431 | -1.425571132 | -1.369923607 | -1.040620897 |
| KRE28   | YDR532C   | -1.179484498 | -1.210571122 | 1.551435662  | -1.281573329 |
| YDR533C | YDR533C   | -1.054370483 | 4.231829924  | 7.256499882  | -1.714742798 |
| FIT1    | YDR534C   | -1.775481134 | -2.877874187 | -2.090172384 | -1.376859731 |
| PAD1    | YDR538W   | 1.130091111  | -1.348324706 | -1.460159994 | 1.082943885  |
| YDR539W | YDR539W   | -1.112917934 | -1.151002172 | -1.014642729 | -1.134391583 |
| YDR540C | YDR540C   | 1.035911402  | 2.8077812    | 3.068898474  | -1.092997728 |
| YDR541C | YDR541C   | 1.009282969  | -1.219682697 | 1.102850326  | 1.105936743  |
| YDR542W | YDR542W   | 1.023434889  | -1.087547349 | 1.081854958  | -1.176568492 |
| YDR543C | YDR543C   | 1.615306454  | -1.294818258 | -1.642985526 | 1.26889277   |

|         |           |              |              |              |              |
|---------|-----------|--------------|--------------|--------------|--------------|
| YRF1-1  | YDR545W   | -1.085144973 | -1.045754038 | 1.230441051  | -1.286738698 |
| YEL001C | YEL001C   | 1.062523949  | -1.646229402 | -1.835109012 | 1.114734683  |
| WBP1    | YEL002C   | 1.225012961  | -1.028060024 | -1.294527375 | 1.259194352  |
| GIM4    | YEL003W   | -1.062603437 | -1.927908564 | -1.465917748 | -1.315154665 |
| YEA4    | YEL004W   | 1.069617454  | -1.584236139 | 1.519307347  | 1.042735784  |
| VAB2    | YEL005C   | -1.073984074 | -1.742488547 | 1.741313554  | 1.000674773  |
| YEL006W | YEL006W   | 1.17083457   | -1.193292978 | -1.102909058 | 1.316093633  |
| YEL007W | YEL007W   | 1.236728807  | -1.557687278 | -1.135398461 | 1.768595737  |
| GCN4    | YEL009C   | 1.254602388  | -2.339975186 | -3.298088666 | 1.409454547  |
| GLC3    | YEL011W   | 1.235728893  | 22.516252    | 21.81257044  | 1.032260368  |
| UBC8    | YEL012W   | -1.338213221 | 2.3142077    | 2.563223616  | -1.107603097 |
| VAC8    | YEL013W   | 1.264309808  | -1.561307954 | 1.32079488   | 1.182097218  |
| YEL015W | YEL015W   | -1.039600945 | -1.358902438 | -1.663011701 | 1.223790358  |
| YEL016C | YEL016C   | -1.151498951 | -1.464942431 | -1.410930915 | -1.038280766 |
| PMP2    | YEL017C-A | 1.29629128   | -2.310171502 | -2.39216698  | 1.035493243  |
| YEL017W | YEL017W   | -1.114776571 | -1.084182562 | 1.850062685  | -1.706412507 |
| EAF5    | YEL018W   | 1.020002001  | -1.216743795 | -1.299497934 | 1.068012789  |
| YEL020C | YEL020C   | -1.009916977 | 2.382269159  | 2.479114833  | -1.040652701 |
| TIM9    | YEL020W-A | -1.088912363 | -1.090248348 | 1.104217717  | -1.203871542 |
| GEA2    | YEL022W   | -1.048286697 | -1.934657177 | -1.693495439 | -1.142404717 |
| YEL023C | YEL023C   | -1.048828472 | -1.297346559 | 1.004544816  | -1.303242761 |
| RIP1    | YEL024W   | 1.274435488  | 3.462652707  | 2.002025365  | 1.729574844  |
| SRI1    | YEL025C   | 1.042312871  | -1.551771694 | 1.369812435  | 1.132835163  |
| SNU13   | YEL026W   | 1.322877009  | -10.41049529 | -9.700765061 | -1.073162295 |
| CUP5    | YEL027W   | 1.259899872  | -1.933468122 | -1.927993296 | -1.00283965  |
| YEL028W | YEL028W   | -1.066374556 | 2.381319583  | -1.157524919 | 2.756436759  |
| BUD16   | YEL029C   | 1.106252154  | -2.071177618 | -2.755838774 | 1.330566124  |
| ECM10   | YEL030W   | 1.194504455  | -1.741181707 | 1.214966456  | 1.433110929  |
| SPF1    | YEL031W   | 1.066348037  | -1.30295585  | -1.101803383 | -1.182566571 |
| MCM3    | YEL032W   | -1.019396168 | -2.009119971 | -1.82161963  | -1.102930567 |
| YEL033W | YEL033W   | 1.415066066  | -2.318620209 | -2.957974722 | 1.27574784   |
| HYP2    | YEL034W   | 1.083249048  | -1.386329065 | -1.118571237 | -1.239374855 |
| ANP1    | YEL036C   | 1.122136662  | -1.522353401 | -1.629251052 | 1.070218683  |
| RAD23   | YEL037C   | -1.123391019 | -1.142120583 | -1.012362183 | -1.128173891 |
| UTR4    | YEL038W   | 1.129189051  | -1.282455387 | 1.309725618  | -1.021264078 |
| CYC7    | YEL039C   | -1.042972251 | 13.12654347  | 18.90872338  | -1.440495239 |
| UTR2    | YEL040W   | 1.170758449  | -3.158483124 | -3.64628138  | 1.154440672  |
| YEL041W | YEL041W   | 1.012437248  | 3.991526295  | 3.062707668  | 1.30326715   |
| GDA1    | YEL042W   | 1.267612337  | -3.472291947 | -5.634529783 | 1.622711992  |
| YEL043W | YEL043W   | -1.076653012 | -1.443809542 | -1.050787288 | -1.374026464 |
| IES6    | YEL044W   | -1.207954104 | -2.214076625 | -1.542064583 | -1.435787223 |
| GLY1    | YEL046C   | 1.186311728  | -2.989426115 | -3.046096487 | 1.01895694   |
| YEL047C | YEL047C   | 1.141111724  | -1.016533358 | 1.05347002   | -1.070887416 |
| YEL048C | YEL048C   | 1.201187189  | -3.240466184 | -2.975191983 | -1.089162045 |
| PAU2    | YEL049W   | 1.110908508  | -1.097134623 | 1.064932003  | 1.030239132  |
| RML2    | YEL050C   | -1.151535671 | -1.293161332 | 1.253340761  | 1.031771545  |
| VMA8    | YEL051W   | -1.258203928 | -1.719855151 | -1.439660343 | -1.194625635 |
| AFG1    | YEL052W   | -1.017019188 | -1.289468016 | 1.309324746  | -1.015399165 |
| MAK10   | YEL053C   | 1.013753715  | -2.991667195 | -3.514378486 | 1.174722406  |

|           |           |              |              |              |              |
|-----------|-----------|--------------|--------------|--------------|--------------|
| RPL12A    | YEL054C   | 1.022826712  | -15.656711   | -10.50493979 | -1.490414159 |
| POL5      | YEL055C   | -1.010099242 | -5.083811442 | -5.630320352 | 1.107499838  |
| HAT2      | YEL056W   | -1.161316797 | -1.096006646 | 1.249767711  | -1.140292093 |
| YEL057C   | YEL057C   | -1.282736906 | 2.144870029  | 2.706157501  | -1.261688338 |
| PCM1      | YEL058W   | 1.069965257  | -1.386084278 | -1.214140288 | -1.141617893 |
| SOM1      | YEL059C-A | -1.255274902 | -1.349342996 | 1.10274234   | -1.487977654 |
| PRB1      | YEL060C   | 1.253053595  | 6.620982034  | 5.721499913  | 1.157210895  |
| CIN8      | YEL061C   | 1.063463902  | -1.052443391 | -1.355065925 | 1.287542815  |
| NPR2      | YEL062W   | 1.019451258  | -1.758889393 | 1.650665066  | 1.065564074  |
| CAN1      | YEL063C   | 1.003995557  | -1.103144519 | -1.170072136 | 1.060669855  |
| YEL064C   | YEL064C   | 1.194482024  | -1.036648071 | -1.167196708 | 1.209972216  |
| SIT1      | YEL065W   | 1.247728646  | -1.86493486  | -2.426118794 | 1.300913423  |
| HPA3      | YEL066W   | -1.411848235 | -1.49516511  | 1.127690509  | -1.686083504 |
| YEL067C   | YEL067C   | 1.149751167  | -1.255711297 | -1.689844676 | 1.345727063  |
| YEL068C   | YEL068C   | 1.021903504  | -1.35233655  | -1.369996194 | 1.013058617  |
| YEL070W   | YEL070W   | 1.306294173  | -1.547597239 | 1.506635224  | 1.027187745  |
| DLD3      | YEL071W   | -1.065847848 | -1.05857717  | 1.335014958  | -1.261140894 |
| RMD6      | YEL072W   | -1.253778521 | -1.047110973 | -1.013885898 | -1.032770034 |
| YEL073C   | YEL073C   | 1.052969995  | -1.648228573 | 1.294371211  | 1.273381669  |
| YEL074W   | YEL074W   | 1.267825897  | -1.099568369 | -1.278665955 | 1.405980639  |
| YEL075C   | YEL075C   | -1.113535503 | -1.423769008 | -1.144834736 | -1.243645884 |
| YEL075W-A | YEL075W-A | 1.511823936  | -1.42528985  | -1.146263218 | 1.63375733   |
| YEL076C   | YEL076C   | -1.078548768 | -2.292428399 | -1.92598122  | -1.190265188 |
| YEL076C-A | YEL076C-A | 1.199328996  | -1.605687476 | -2.048669563 | 1.27588313   |
| YEL077C   | YEL077C   | -1.133040877 | -1.033705215 | 1.309312457  | -1.266620733 |
| MNN1      | YER001W   | 1.003106123  | -4.401782281 | -5.423575071 | 1.232131606  |
| NOPI6     | YER002W   | -1.166375885 | -5.983115614 | -6.228916971 | 1.041082502  |
| PMI40     | YER003C   | 1.186173097  | -1.191338128 | -1.306984293 | 1.097072495  |
| YER004W   | YER004W   | 1.101798146  | -1.414529506 | 1.259087296  | 1.123456262  |
| YND1      | YER005W   | 1.103386122  | -1.140598271 | 1.131226127  | 1.008284943  |
| NUG1      | YER006W   | 1.017534666  | -17.95809144 | -18.7073512  | 1.041722683  |
| YER007C-A | YER007C-A | -1.312678182 | -2.040095945 | -1.340925276 | -1.521409121 |
| PAC2      | YER007W   | -1.157765397 | -1.33759537  | -1.135601276 | -1.177874134 |
| SEC3      | YER008C   | 1.196232924  | -1.332633832 | 1.241673679  | 1.073256086  |
| NTF2      | YER009W   | 1.308586879  | -2.292309249 | -1.614401701 | -1.419912557 |
| YER010C   | YER010C   | 1.075653473  | -1.085911079 | -1.090250235 | 1.003995867  |
| TIR1      | YER011W   | 1.300429889  | -1.03523939  | -1.050596733 | 1.01483458   |
| PRE1      | YER012W   | 1.003614059  | -1.011623705 | 1.002521201  | -1.014174212 |
| PRP22     | YER013W   | -1.058124666 | -1.01195312  | 1.184134587  | -1.170147671 |
| HEM14     | YER014W   | -1.205083068 | -1.966575726 | 1.991387987  | -1.012616988 |
| FAA2      | YER015W   | 1.123798406  | -1.657026402 | 1.470619419  | 1.126754061  |
| BIM1      | YER016W   | -1.12020095  | -1.341448394 | -1.195022328 | -1.122529983 |
| AFG3      | YER017C   | 1.023215585  | -1.292095672 | 1.146658805  | 1.126835347  |
| SPC25     | YER018C   | -1.075048217 | -1.126263281 | 1.206432389  | -1.3587605   |
| SBH2      | YER019C-A | 1.001993061  | -2.644679888 | -1.452150635 | -1.821215942 |
| ISC1      | YER019W   | 1.106753082  | -1.01084588  | 1.057866912  | -1.046516519 |
| GPA2      | YER020W   | -1.138677083 | 2.329496045  | 2.563048911  | -1.100258967 |
| RPN3      | YER021W   | -1.14811525  | -1.269106105 | 1.302502561  | -1.026314944 |
| SRB4      | YER022W   | -1.12653695  | -1.112556757 | 1.143159844  | -1.027506989 |

|           |           |              |              |              |              |
|-----------|-----------|--------------|--------------|--------------|--------------|
| PRO3      | YER023W   | -1.018920084 | -1.566781378 | -1.303663563 | -1.201829538 |
| YAT2      | YER024W   | 1.004995476  | -1.118430775 | 1.505754539  | -1.346310003 |
| GCD11     | YER025W   | -1.108707717 | -6.204443894 | -6.026890802 | -1.029460148 |
| CHO1      | YER026C   | 1.091311317  | -1.578990848 | 1.385175344  | 1.139921278  |
| GAL83     | YER027C   | -1.031065575 | -1.502271806 | 1.406828412  | 1.067842953  |
| YER028C   | YER028C   | -1.013030487 | -2.928381917 | -2.862450492 | -1.023033211 |
| SMB1      | YER029C   | -1.126539899 | -2.0200922   | -1.494894762 | -1.351327365 |
| YER030W   | YER030W   | -1.149334874 | -1.209575774 | 1.390128836  | -1.149269741 |
| YPT31     | YER031C   | -1.367706374 | -1.491865359 | -1.091189585 | -1.367191714 |
| FIR1      | YER032W   | 1.238216073  | -1.6314759   | -2.07922676  | 1.274445281  |
| ZRG8      | YER033C   | 1.264808065  | 4.07659565   | 3.199586508  | 1.274100775  |
| YER034W   | YER034W   | -1.126360535 | -1.452322189 | 1.287668717  | 1.127869435  |
| EDC2      | YER035W   | -1.0785143   | 5.030509118  | 6.095152099  | -1.211637223 |
| KRE30     | YER036C   | 1.126680649  | -2.422859078 | -2.900293866 | 1.197054295  |
| PHM8      | YER037W   | -1.01229084  | 13.05674093  | 11.63684434  | 1.122017322  |
| KRE29     | YER038C   | 1.012535875  | -1.526229935 | -1.432945697 | -1.065099632 |
| HVG1      | YER039C   | -1.063114398 | 2.199775734  | 2.230552087  | -1.013990678 |
| YER039C-A | YER039C-A | 1.14681894   | -1.540296466 | 1.477603699  | 1.042428675  |
| GLN3      | YER040W   | -1.08356593  | -1.04296409  | 1.02939413   | 1.013182473  |
| YEN1      | YER041W   | -1.046437416 | -1.687708629 | 1.381372978  | 1.221761723  |
| MXR1      | YER042W   | -1.085753223 | -2.516964962 | -1.919738875 | -1.311097563 |
| SAH1      | YER043C   | 1.201311323  | -3.039830933 | -3.867359363 | 1.272228439  |
| ERG28     | YER044C   | 1.194030877  | -1.069693983 | 1.15185721   | -1.232134728 |
| MEI4      | YER044C-A | 1.119222078  | -1.341531598 | -1.710182695 | 2.294264124  |
| ACA1      | YER045C   | 1.314651559  | -1.1837675   | -1.468924893 | 1.240889695  |
| SPO73     | YER046W   | -1.136073992 | -1.031287274 | 1.073210891  | -1.106788734 |
| SAP1      | YER047C   | 1.080085489  | 5.883037093  | 1.161595922  | 5.064615832  |
| CAJ1      | YER048C   | -1.15976818  | -1.607500647 | 1.459501536  | 1.101403875  |
| YER048W-A | YER048W-A | 1.136410198  | -1.260989862 | -1.002411648 | -1.257956115 |
| YER049W   | YER049W   | 1.007326703  | -5.996333451 | -7.521535257 | 1.254355736  |
| RSM18     | YER050C   | -1.080279375 | -1.135376686 | 1.382097397  | -1.217302957 |
| YER051W   | YER051W   | -1.231336301 | -1.066737135 | 1.096512038  | -1.027912127 |
| HOM3      | YER052C   | 1.177715136  | -1.281180648 | -1.419848624 | 1.108234522  |
| YER053C   | YER053C   | -1.063740401 | 3.848562947  | 3.884903189  | -1.009442549 |
| YER053C-A | YER053C-A | -1.070755727 | 11.77821034  | 25.44258979  | -2.160140553 |
| GIP2      | YER054C   | 1.232629144  | 17.37361509  | 15.88101503  | 1.09398644   |
| HIS1      | YER055C   | 1.012634084  | -3.680613131 | -3.428924045 | -1.073401768 |
| FCY2      | YER056C   | 1.204414939  | -8.915421317 | -18.26555252 | 2.04875932   |
| RPL34A    | YER056C-A | 1.033835545  | -4.329604538 | -3.735931964 | -1.158908829 |
| HMF1      | YER057C   | 1.185305892  | -1.661656621 | -1.391642313 | -1.194025653 |
| PET117    | YER058W   | -1.07245933  | 2.003307366  | 2.716735756  | -1.356125278 |
| PCL6      | YER059W   | -1.196714579 | -1.350552958 | 1.350827146  | -1.000203019 |
| FCY21     | YER060W   | 1.215387573  | -3.055392808 | -3.154558876 | 1.032456078  |
| FCY22     | YER060W-A | 1.292955764  | -4.352341008 | -6.00394458  | 1.379474762  |
| CEM1      | YER061C   | -1.115875364 | 2.081798725  | 1.865052632  | 1.116214465  |
| HOR2      | YER062C   | -1.473253701 | 3.732615882  | 5.202591607  | -1.39381918  |
| THO1      | YER063W   | -1.235405404 | -1.257808503 | -1.048053841 | -1.200137296 |
| YER064C   | YER064C   | -1.051191566 | -1.004982141 | -1.133868282 | 1.128247195  |
| ICL1      | YER065C   | -1.215988129 | -1.055628384 | 1.118363326  | -1.180576071 |

|           |           |              |              |              |              |
|-----------|-----------|--------------|--------------|--------------|--------------|
| YER066W   | YER066W   | 1.101497799  | -1.565987636 | 1.608418892  | -1.027095524 |
| YER067W   | YER067W   | -1.1630777   | 25.00486603  | 42.90499925  | -1.715865992 |
| MOT2      | YER068W   | 1.063963059  | -1.166293934 | -1.026787089 | 1.197535553  |
| ARG5,6    | YER069W   | -1.048938421 | -1.807401634 | 1.792377416  | 1.008382285  |
| RNR1      | YER070W   | 1.11986186   | -9.680751857 | -11.17743212 | 1.154603721  |
| YER071C   | YER071C   | 1.045021438  | -1.116800298 | -1.039329326 | -1.074539389 |
| VTC1      | YER072W   | -1.003481103 | -3.205743337 | -2.932173878 | -1.093299193 |
| ALD5      | YER073W   | -1.079202925 | -8.964226186 | -7.214148019 | -1.242589722 |
| RPS24A    | YER074W   | -1.138181363 | -10.15672839 | -6.376916458 | -1.592733489 |
| YER074W-A | YER074W-A | 1.258684954  | -1.348145902 | -1.225226618 | -1.100323713 |
| PTP3      | YER075C   | 1.082447268  | -1.690732049 | -2.221932625 | 1.314183774  |
| YER076C   | YER076C   | -1.025427328 | -1.345775033 | 1.479800904  | -1.099590102 |
| YER077C   | YER077C   | -1.019898937 | -1.009062198 | -1.072160875 | 1.062532     |
| YER078C   | YER078C   | -1.169541636 | -1.120295226 | 1.050293717  | 1.06664946   |
| YER079W   | YER079W   | -1.156829724 | 3.422475299  | 3.75253724   | -1.096439539 |
| YER080W   | YER080W   | -1.128409778 | -1.462191116 | 1.36597285   | 1.070439369  |
| SER3      | YER081W   | -1.093710205 | -1.107307586 | 1.151284282  | -1.27482582  |
| UTP7      | YER082C   | 1.105979643  | -6.165572411 | -11.09615686 | 1.799696139  |
| RMD7      | YER083C   | 1.256580162  | -1.012984801 | -1.057847788 | 1.071583731  |
| ILV1      | YER086W   | 1.269488786  | -3.944411324 | -5.831221464 | 1.47835025   |
| SBH1      | YER087C-B | 1.051532365  | -1.729143316 | -1.419436667 | -1.218189832 |
| YER087W   | YER087W   | -1.061648674 | 2.24163671   | 1.868146407  | 1.199925606  |
| DOT6      | YER088C   | 1.601788219  | 2.270127119  | 1.297915423  | 1.749056279  |
| PTC2      | YER089C   | 1.071008263  | -1.385817562 | -1.646550298 | 1.188143622  |
| TRP2      | YER090W   | -1.149679868 | -1.853590574 | -1.636193784 | -1.132867386 |
| MET6      | YER091C   | 1.252896369  | -2.546389212 | -5.21307547  | 2.047242206  |
| IES5      | YER092W   | -1.173665522 | -1.141956528 | -1.020122241 | -1.119431066 |
| TSC11     | YER093C   | -1.057396412 | -1.064644152 | 1.036882386  | -1.103910768 |
| YER093C-A | YER093C-A | -1.003072189 | -1.031508524 | 1.073187475  | -1.107002028 |
| PUP3      | YER094C   | -1.103547945 | -1.106721642 | 1.099342257  | -1.216665868 |
| RAD51     | YER095W   | 1.155416502  | -1.8619678   | 1.880725102  | -1.010073913 |
| SHC1      | YER096W   | 1.246184454  | 4.901122818  | 4.240534171  | 1.155779583  |
| YER097W   | YER097W   | 1.322598634  | -1.980936012 | -1.564488251 | -1.266187849 |
| UBP9      | YER098W   | -1.091891018 | 2.319435034  | 2.179235648  | 1.064334202  |
| PRS2      | YER099C   | 1.0004142    | -1.538858051 | -1.713154182 | 1.113263294  |
| UBC6      | YER100W   | -1.147111862 | -1.034053284 | 1.021671528  | -1.056462798 |
| AST2      | YER101C   | 1.060968246  | -1.573016144 | 1.336863573  | 1.176646724  |
| RPS8B     | YER102W   | -1.070979777 | -9.239141809 | -6.29402852  | -1.467921822 |
| SSA4      | YER103W   | -1.01981041  | 45.7974408   | 154.8991178  | -3.382265801 |
| RTT105    | YER104W   | -1.15735786  | -1.019615034 | -1.469573023 | 1.441301837  |
| NUP157    | YER105C   | 1.111855706  | -1.005516074 | -1.300155685 | 1.293023274  |
| GLE2      | YER107C   | -1.318478612 | -2.023636358 | -1.595719818 | -1.26816521  |
| FLO8      | YER109C   | -1.11063179  | -1.149683997 | -1.131937285 | -1.015678177 |
| KAP123    | YER110C   | 1.310833651  | -7.101919487 | -7.262887609 | 1.022665439  |
| SWI4      | YER111C   | -1.011632355 | -1.059829414 | 1.110052183  | -1.047387597 |
| LSM4      | YER112W   | -1.038523833 | -1.78077906  | -1.891000211 | 1.061894905  |
| YER113C   | YER113C   | 1.159730391  | -1.43156239  | -1.679506934 | 1.17319856   |
| BOI2      | YER114C   | 1.143163876  | -1.257993324 | -1.409814509 | 1.120685207  |
| SPR6      | YER115C   | -1.208841217 | -1.304629661 | -1.216266574 | -1.072651085 |



|               |                |              |              |              |              |
|---------------|----------------|--------------|--------------|--------------|--------------|
| SLX8          | YER116C        | -1.204869885 | -1.354298253 | 1.493050355  | -1.102453135 |
| <b>RPL23B</b> | <b>YER117W</b> | -1.004369757 | -9.974785904 | -6.600372143 | -1.511245985 |
| SHO1          | YER118C        | -1.023772867 | -3.061134249 | -2.941098849 | -1.040813113 |
| YER119C       | YER119C        | 1.059799536  | 3.23868554   | 3.723588798  | -1.149722242 |
| SCS2          | YER120W        | 1.116834953  | -1.574449932 | -1.441691489 | -1.092085196 |
| YER121W       | YER121W        | -1.157865909 | 4.830013435  | 5.175284885  | -1.071484574 |
| GLO3          | YER122C        | -1.256587422 | -1.35840508  | -1.24924014  | -1.087385072 |
| YCK3          | YER123W        | -1.19364843  | -1.645488611 | -1.676493971 | 1.018842647  |
| DSE1          | YER124C        | -1.22051383  | -1.076657724 | -1.332998013 | 1.238088934  |
| RSP5          | YER125W        | 1.297270006  | -1.078422355 | -1.217710236 | 1.31320594   |
| NSA2          | YER126C        | -1.261643555 | -23.31940964 | -15.20885477 | -1.533278474 |
| LCP5          | YER127W        | -1.166234326 | -9.036361337 | -8.706987502 | -1.037828679 |
| YER128W       | YER128W        | 1.085353028  | -1.195064001 | 1.192844263  | -1.425525238 |
| PAK1          | YER129W        | -1.128827515 | -1.494123365 | -1.418692498 | -1.053169286 |
| YER130C       | YER130C        | -1.194004129 | -1.064737981 | 1.317875679  | -1.237746471 |
| <b>RPS26B</b> | <b>YER131W</b> | -1.196037023 | -24.31485331 | -17.86387532 | -1.361118619 |
| PMD1          | YER132C        | 1.049597294  | -1.991734133 | -2.012906839 | 1.010630287  |
| GLC7          | YER133W        | -1.037166393 | -1.140604617 | 1.189643474  | -1.042993738 |
| YER134C       | YER134C        | -1.086139793 | -1.762021701 | 2.021632178  | -1.147336708 |
| GDI1          | YER136W        | -1.041607155 | -1.158963455 | -1.023293297 | 1.185959535  |
| YER137C       | YER137C        | 1.158170297  | -1.762203839 | -2.120446307 | 1.203292298  |
| YER139C       | YER139C        | -1.037760075 | -1.394871571 | 1.184824839  | 1.177280831  |
| YER140W       | YER140W        | 1.04412525   | -1.728630018 | -1.793323134 | 1.037424501  |
| COX15         | YER141W        | -1.065443852 | 2.277295342  | 3.106959822  | -1.364320106 |
| MAG1          | YER142C        | -1.214351363 | 2.506153267  | 2.800925708  | -1.117619479 |
| DDI1          | YER143W        | -1.000639347 | 2.400506794  | 2.462924071  | -1.026001709 |
| UBP5          | YER144C        | 1.057081442  | -1.287936956 | 1.321860338  | -1.026339319 |
| FTR1          | YER145C        | -1.019358355 | -2.169190137 | -1.964738803 | -1.104060313 |
| LSM5          | YER146W        | 1.061264092  | -2.357914649 | -1.371856022 | -1.718777051 |
| SCC4          | YER147C        | 1.032627312  | -1.239117419 | -1.221528998 | -1.014398693 |
| SPT15         | YER148W        | -1.183516559 | -2.066149737 | -2.17164335  | 1.051058068  |
| PEA2          | YER149C        | -1.099498002 | -1.702211152 | -1.51624033  | -1.122652602 |
| SPI1          | YER150W        | 1.101702627  | 25.31782774  | 35.63077084  | -1.407339177 |
| UBP3          | YER151C        | -1.052626142 | -1.184968215 | 1.146706691  | 1.033366443  |
| YER152C       | YER152C        | 1.232724281  | -1.223576282 | 1.027296795  | 1.19106405   |
| OXA1          | YER154W        | 1.090688232  | -1.126051948 | -1.157925407 | 1.028305496  |
| BEM2          | YER155C        | 1.018734307  | -1.029432154 | -1.126001759 | 1.093808616  |
| YER156C       | YER156C        | -1.021511346 | -5.917948308 | -5.99220768  | 1.012548162  |
| COG3          | YER157W        | -1.009922171 | -1.038535773 | -1.106735889 | 1.065669493  |
| YER158C       | YER158C        | 1.329023694  | 3.605361863  | 2.701713626  | 1.334472251  |
| BUR6          | YER159C        | -1.078278517 | -1.094312247 | -1.025302975 | -1.067306224 |
| SPT2          | YER161C        | -1.078484106 | -1.010869042 | -1.129247408 | 1.141521245  |
| RAD4          | YER162C        | 1.039825387  | 2.750672166  | 2.517635175  | 1.092561859  |
| YER163C       | YER163C        | -1.568472068 | 2.051624659  | 3.043799317  | -1.483604374 |
| CHD1          | YER164W        | 1.095310933  | -1.453212439 | -1.526967243 | 1.050752941  |
| PAB1          | YER165W        | 1.17087148   | -5.35829923  | -7.363291618 | 1.374184475  |
| DNF1          | YER166W        | 1.102708138  | -1.092594323 | -1.11466516  | 1.217876826  |
| BCK2          | YER167W        | -1.092085643 | -1.161313605 | -1.039107735 | 1.20672995   |
| CCA1          | YER168C        | -1.000062171 | -1.540462251 | -1.618372297 | 1.050575757  |

|         |           |              |              |              |              |
|---------|-----------|--------------|--------------|--------------|--------------|
| RPH1    | YER169W   | -1.026820585 | -1.455806918 | 1.049010309  | 1.387790859  |
| ADK2    | YER170W   | -1.186665188 | -1.0530178   | 1.06792532   | -1.014156949 |
| RAD3    | YER171W   | -1.101003743 | -2.346952621 | -2.257408882 | -1.039666603 |
| BRR2    | YER172C   | -1.005502286 | -1.496729149 | -1.329781883 | -1.125544849 |
| RAD24   | YER173W   | -1.161547696 | -1.350775442 | -1.372596712 | 1.016154624  |
| GRX4    | YER174C   | 1.074658495  | -1.956517238 | -1.959777642 | 1.001666433  |
| TMT1    | YER175C   | 1.040571394  | 2.775528886  | 2.188100424  | 1.268465036  |
| ECM32   | YER176W   | -1.046193195 | -1.36735195  | -1.249540571 | -1.094283757 |
| BMH1    | YER177W   | -1.111993311 | -1.634387779 | 2.094801895  | -1.281704331 |
| PDA1    | YER178W   | 1.003113609  | -1.055877068 | 1.124723099  | -1.187569329 |
| DMC1    | YER179W   | 1.027371749  | 2.284078378  | 2.899113378  | -1.269270532 |
| ISC10   | YER180C   | -1.169422805 | -1.239648593 | -1.302759357 | 1.050910206  |
| YER182W | YER182W   | -1.266086588 | -1.72964644  | 2.761689611  | -1.596678691 |
| FAU1    | YER183C   | 1.004188883  | -1.405384761 | -1.355006492 | -1.037179356 |
| YER184C | YER184C   | 1.27491815   | -1.269780822 | 1.169813382  | 1.085455887  |
| YER185W | YER185W   | 1.177690306  | -1.629190278 | -1.421585476 | -1.146037509 |
| YER186C | YER186C   | -1.074286531 | -1.855191387 | -2.041398831 | 1.100371016  |
| YER187W | YER187W   | -1.14819328  | -1.298213306 | -1.045097644 | -1.242193314 |
| KHS1    | YER187W-A | 1.249210071  | -1.03941771  | -1.222391993 | 1.270575885  |
| YER188W | YER188W   | -1.00536186  | -1.113745379 | -1.271641445 | 1.141770344  |
| YER189W | YER189W   | -1.027829477 | -1.460179219 | -1.099184912 | -1.328419998 |
| YRF1-2  | YER190W   | -1.064295961 | -1.097933268 | 1.186918408  | -1.303157206 |
| DEG1    | YFL001W   | -1.245644597 | -2.923149433 | -2.660254547 | -1.098823207 |
| SPB4    | YFL002C   | -1.003058182 | -4.289917621 | -4.79963053  | 1.118816479  |
| VTC2    | YFL004W   | -1.047055677 | -2.485531989 | -2.797533391 | 1.125527012  |
| SEC4    | YFL005W   | 1.014958807  | -1.094459675 | -1.092080864 | -1.002178237 |
| YFL006W | YFL006W   | 1.148352475  | -1.043490658 | -1.140149647 | 1.189735504  |
| BLM3    | YFL007W   | 1.253900378  | -1.074276107 | -1.252322657 | 1.345340309  |
| SMC1    | YFL008W   | 1.055619216  | -1.226509575 | -1.132687361 | -1.082831519 |
| CDC4    | YFL009W   | 1.078902064  | -1.307580231 | 1.176091589  | 1.111801363  |
| WWM1    | YFL010C   | -1.199537272 | -1.236906494 | 1.586784124  | -1.28286506  |
| AUA1    | YFL010W-A | 1.230481979  | -1.2749196   | 1.018639732  | 1.251590292  |
| HXT10   | YFL011W   | 1.571148044  | 2.050512811  | -1.09416096  | 2.243591063  |
| IES1    | YFL013C   | 1.169301143  | -1.125943432 | 1.020133238  | 1.103721935  |
| HSP12   | YFL014W   | 1.193765119  | 300.9833036  | 265.5461012  | 1.133450283  |
| YFL015C | YFL015C   | 1.234809877  | 5.156028381  | 5.369057202  | -1.041316456 |
| MDJ1    | YFL016C   | -1.024442006 | 7.167125793  | 10.26155962  | -1.431753803 |
| GNA1    | YFL017C   | -1.222673411 | -1.528209938 | 1.000059137  | -1.528300311 |
| SMX2    | YFL017W-A | 1.008096419  | -1.534778279 | -1.038196404 | -1.478312074 |
| LPD1    | YFL018C   | -1.149738131 | -1.619970224 | 1.243639344  | 1.302604515  |
| PAU5    | YFL020C   | 1.053996455  | -1.239739252 | 1.502760103  | -1.212158203 |
| GAT1    | YFL021W   | 1.35766826   | -1.327701698 | -1.126715297 | 1.495941814  |
| FRS2    | YFL022C   | 1.104309743  | -2.251297252 | -2.876007273 | 1.27748891   |
| BUD27   | YFL023W   | -1.010580464 | -3.778674892 | -5.495762442 | 1.454415264  |
| EPL1    | YFL024C   | 1.010347508  | -1.132181461 | 1.004463995  | 1.12714987   |
| BST1    | YFL025C   | 1.412283223  | -1.00830944  | -1.604612459 | 1.59138891   |
| STE2    | YFL026W   | 1.135672687  | -1.481496398 | -2.518933946 | 1.700263294  |
| GYP8    | YFL027C   | -1.228978921 | -1.27126128  | -1.142086675 | -1.11310403  |
| CAF16   | YFL028C   | -1.054031048 | -1.230064531 | -1.192436833 | -1.031555297 |

|           |           |              |              |              |              |
|-----------|-----------|--------------|--------------|--------------|--------------|
| CAK1      | YFL029C   | -1.017640075 | -1.599163098 | 1.328415986  | 1.203811995  |
| YFL030W   | YFL030W   | -1.046606065 | 3.098149486  | 3.17315079   | -1.02420842  |
| HAC1      | YFL031W   | -1.04869534  | -1.552249406 | 1.723722934  | -1.110467768 |
| RIM15     | YFL033C   | -1.022451113 | -1.561095254 | 1.863441651  | -1.193675816 |
| RPL22B    | YFL034C-A | 1.004947774  | -8.118337681 | -11.93239412 | 1.469807563  |
| MOB2      | YFL034C-B | -1.205941136 | -1.565859622 | -1.736519473 | 1.108987964  |
| YFL034W   | YFL034W   | 1.068764878  | -1.249621952 | 1.092889023  | 1.143411569  |
| RPO41     | YFL036W   | -1.037022497 | -1.447853891 | 1.585546787  | -1.095101374 |
| TUB2      | YFL037W   | 1.016595132  | -1.12381815  | -1.110510563 | -1.011983305 |
| YPT1      | YFL038C   | -1.196693743 | -1.21014603  | 1.385782274  | -1.145136404 |
| ACT1      | YFL039C   | -1.257618131 | -1.098392178 | 1.27576899   | -1.401294679 |
| FET5      | YFL041W   | 1.148576601  | -1.260213902 | -1.130640444 | -1.114601824 |
| YFL042C   | YFL042C   | -1.074073499 | 2.832340297  | 2.421183385  | 1.16981651   |
| YFL044C   | YFL044C   | 1.081785172  | 2.782472102  | 2.148459584  | 1.295100975  |
| SEC53     | YFL045C   | 1.016667483  | -3.2684479   | -3.040780225 | -1.074871466 |
| YFL046W   | YFL046W   | -1.042450115 | -1.078178131 | 1.125491508  | -1.043882709 |
| RGD2      | YFL047W   | -1.087723419 | -1.017667735 | -1.076111594 | 1.057429215  |
| EMP47     | YFL048C   | -1.106361129 | -1.429996191 | 1.153815127  | 1.239363358  |
| YFL049W   | YFL049W   | -1.177561285 | -1.050555764 | 1.121210793  | -1.067254905 |
| ALR2      | YFL050C   | 1.10821602   | -1.773413372 | 1.31543719   | 1.348155112  |
| YFL054C   | YFL054C   | 1.06518138   | 3.177107626  | 3.550493415  | -1.117523808 |
| AGP3      | YFL055W   | 1.3299173    | 2.208423108  | 1.840958799  | 1.199604852  |
| AAD6      | YFL056C   | 1.090623165  | -1.269659124 | 1.109715969  | 1.144129814  |
| YFL057C   | YFL057C   | 1.134354417  | -1.591143257 | 1.338838142  | 1.188450797  |
| THI5      | YFL058W   | 1.100194077  | -1.536394016 | 1.319453157  | 1.164417251  |
| SNZ3      | YFL059W   | -1.481508595 | -1.508672937 | -1.146442676 | -1.315960203 |
| SNO3      | YFL060C   | -1.408376864 | -1.042257967 | 1.513873029  | -1.452493602 |
| COS4      | YFL062W   | 1.200980754  | -1.705750392 | 1.255064389  | 1.359093929  |
| YFL063W   | YFL063W   | 1.532512473  | -1.256875119 | -1.767865011 | 2.221985546  |
| YFL064C   | YFL064C   | -1.083352568 | -1.392637227 | -1.301015219 | -1.070423472 |
| YFL065C   | YFL065C   | 1.0732833    | -1.241345046 | -1.341033543 | 1.08030684   |
| YFL066C   | YFL066C   | 1.262465305  | -1.175430042 | 1.096867648  | 1.071624315  |
| YFL067W   | YFL067W   | -1.00737837  | -1.28620456  | 1.107186838  | -1.42406876  |
| YFL068W   | YFL068W   | -1.040203618 | -1.237077513 | -1.204227598 | -1.027278826 |
| LOC1      | YFR001W   | -1.263180835 | -7.733346769 | -6.432791798 | -1.202175822 |
| NIC96     | YFR002W   | -1.250132205 | -1.807987686 | -1.39520527  | -1.295857839 |
| YFR003C   | YFR003C   | -1.134074601 | 2.533011044  | 3.384708127  | -1.336238993 |
| RPN11     | YFR004W   | -1.221453702 | -1.26166294  | 1.71022931   | -1.355535822 |
| SAD1      | YFR005C   | 1.102498787  | -1.745961859 | -2.302665659 | 1.318852212  |
| YFR006W   | YFR006W   | -1.069714096 | -1.00215366  | -1.004674339 | 1.006838066  |
| YFR007W   | YFR007W   | -1.025572847 | -1.177073678 | -1.124820288 | 1.323996354  |
| YFR008W   | YFR008W   | -1.34343944  | 2.214010351  | 2.466770597  | -1.114163986 |
| GCN20     | YFR009W   | -1.000662524 | -1.280122065 | -1.271742925 | -1.006588706 |
| UBP6      | YFR010W   | -1.069892137 | -1.534760921 | 1.706468005  | -1.111878717 |
| YFR011C   | YFR011C   | 1.063298652  | -1.130897825 | -1.024310657 | 1.158390695  |
| YFR012W-A | YFR012W-A | 1.616100286  | -1.437049883 | -1.182339656 | 1.699081064  |
| IOC3      | YFR013W   | -1.180074327 | -1.417687936 | -1.382413184 | -1.025516793 |
| CMK1      | YFR014C   | -1.124625691 | 2.669698324  | 2.904519705  | -1.087958021 |
| GSY1      | YFR015C   | 1.080666923  | 7.997464368  | 8.591097165  | -1.074227626 |

|         |           |              |              |              |              |
|---------|-----------|--------------|--------------|--------------|--------------|
| YFR016C | YFR016C   | -1.041791633 | -1.669078921 | 1.727423258  | -1.034956008 |
| YFR017C | YFR017C   | -1.016398174 | 6.62466242   | 8.516383323  | -1.285557328 |
| YFR018C | YFR018C   | 1.114301809  | -1.96957691  | -2.103363659 | 1.067926643  |
| FAB1    | YFR019W   | -1.279243073 | -1.291626343 | 1.595157481  | -1.234999185 |
| YFR020W | YFR020W   | 1.257684352  | -1.22155117  | 1.236881148  | -1.012549599 |
| AUT10   | YFR021W   | 1.151672243  | -1.884755461 | 1.813515941  | 1.039282544  |
| YFR022W | YFR022W   | 1.135485832  | -1.341464554 | 1.169517438  | 1.147023986  |
| YFR024C | YFR024C   | -1.066252522 | -1.497744358 | 1.833560486  | -1.224214584 |
| LSB3    | YFR024C-A | -1.080990183 | -1.468934448 | 1.834808023  | -1.249074134 |
| HIS2    | YFR025C   | -1.152538705 | -1.108820986 | 1.004110732  | 1.10428158   |
| YFR026C | YFR026C   | -1.022770813 | -1.291230007 | 1.209836965  | 1.067276042  |
| ECO1    | YFR027W   | -1.260431606 | -1.189963824 | 1.34044349   | -1.595079261 |
| CDC14   | YFR028C   | -1.039969764 | -1.58321254  | -1.486601201 | -1.064988067 |
| PTR3    | YFR029W   | -1.050469584 | -1.522740535 | 1.609618705  | -1.057053823 |
| MET10   | YFR030W   | 1.141428359  | -1.261747275 | -1.318176318 | 1.044722936  |
| SMC2    | YFR031C   | -1.066516683 | -1.597236367 | -1.496990301 | -1.066965073 |
| RPL2A   | YFR031C-A | -1.348070381 | -11.68498917 | -7.040509119 | -1.659679573 |
| YFR032C | YFR032C   | 1.125103609  | -3.128168845 | -5.138810133 | 1.642753441  |
| RPL29   | YFR032C-A | 1.015058424  | -7.694236501 | -4.090743815 | -1.880889356 |
| QCR6    | YFR033C   | 1.060519139  | -1.530334025 | 1.691646602  | -1.105410044 |
| PHO4    | YFR034C   | -1.014465109 | -1.838829938 | -1.798215151 | -1.022586167 |
| CDC26   | YFR036W   | -1.107958112 | -1.150188129 | 1.078386154  | -1.240346953 |
| RSC8    | YFR037C   | -1.043108881 | -1.295710953 | -1.283014813 | -1.009895552 |
| YFR038W | YFR038W   | -1.039838028 | -1.877038439 | -2.303422531 | 1.227157891  |
| YFR039C | YFR039C   | 1.007228167  | -1.116145504 | -1.023359338 | 1.142217924  |
| SAP155  | YFR040W   | -1.10036299  | -1.247511959 | 1.220911969  | 1.021786984  |
| YFR041C | YFR041C   | -1.109433627 | -1.226158667 | 1.171627117  | 1.046543435  |
| YFR042W | YFR042W   | 1.104311283  | -1.866002443 | 2.214309947  | -1.186659725 |
| YFR043C | YFR043C   | 1.007355902  | -1.151234177 | 1.01430934   | 1.134993173  |
| YFR044C | YFR044C   | 1.057834136  | -1.333187859 | 1.475667776  | -1.106871597 |
| YFR045W | YFR045W   | 1.339053352  | -1.923631637 | 1.6779644    | 1.146407896  |
| YFR046C | YFR046C   | -1.071960964 | -1.080626612 | 1.294447632  | -1.197867624 |
| BNA6    | YFR047C   | 1.033789644  | -1.449215726 | 1.319565063  | 1.098252574  |
| RMD8    | YFR048W   | -1.173823325 | -1.082660293 | 1.044123233  | -1.130430765 |
| YMR31   | YFR049W   | -1.258772199 | -1.424170884 | 2.567350334  | -1.802698231 |
| PRE4    | YFR050C   | 1.043613731  | -1.087561299 | 1.300981159  | -1.196237086 |
| RET2    | YFR051C   | 1.088903152  | -1.041337132 | 1.188779577  | -1.141589539 |
| RPN12   | YFR052W   | -1.032098779 | -1.280350881 | 1.304287797  | -1.018695591 |
| HXX1    | YFR053C   | 1.195852157  | 24.23117447  | 25.85625399  | -1.067065652 |
| YFR055W | YFR055W   | 1.327945023  | -3.186540985 | -4.81095437  | 1.509773259  |
| ERG26   | YGL001C   | 1.083373155  | -1.449242565 | -1.48319195  | 1.023425606  |
| ERP6    | YGL002W   | -1.077660011 | -1.132895706 | 1.36116332   | -1.542056081 |
| CDH1    | YGL003C   | 1.024088984  | -1.267037434 | 1.429634069  | -1.128328201 |
| YGL004C | YGL004C   | -1.120700426 | 2.326891061  | 2.056161756  | 1.131667319  |
| COG7    | YGL005C   | -1.142465703 | -1.028331852 | -1.150646636 | 1.183246586  |
| PMC1    | YGL006W   | 1.133482019  | 2.35629313   | 2.197837996  | 1.072095912  |
| PMA1    | YGL008C   | 1.201186157  | -2.103358776 | -2.458924175 | 1.16904648   |
| LEU1    | YGL009C   | 1.128095688  | -3.137267888 | -3.24799545  | 1.035294264  |
| YGL010W | YGL010W   | 1.264616335  | 3.129459504  | 3.021915651  | 1.035587973  |

|         |         |              |              |              |              |
|---------|---------|--------------|--------------|--------------|--------------|
| SCL1    | YGL011C | -1.301606919 | -1.109377001 | 1.735462394  | -1.564357646 |
| ERG4    | YGL012W | 1.130980197  | -1.708154637 | -1.588685155 | -1.075200226 |
| PDR1    | YGL013C | -1.114949679 | -1.083684341 | 1.415687244  | -1.306364954 |
| PUF4    | YGL014W | 1.351805588  | -1.987813928 | -2.790752093 | 1.403930245  |
| KAP122  | YGL016W | 1.124190451  | -2.5138137   | -2.764215426 | 1.099610295  |
| ATE1    | YGL017W | -1.038556549 | -1.132086825 | 1.328839901  | -1.504362144 |
| JAC1    | YGL018C | -1.105752447 | -1.202380494 | 1.279361659  | -1.064023964 |
| CKB1    | YGL019W | -1.022253119 | -1.048978251 | 1.021716806  | -1.071758708 |
| SWF3    | YGL020C | -1.036017495 | -1.567034746 | -1.470044262 | -1.065977935 |
| ALK1    | YGL021W | 1.157527635  | -1.039267118 | -1.149430974 | 1.106001483  |
| STT3    | YGL022W | 1.101905257  | -1.54423344  | -1.438021123 | -1.073860053 |
| PIB2    | YGL023C | -1.152331919 | -1.015988448 | 1.172084507  | -1.1536396   |
| YGL024W | YGL024W | -1.156701132 | -1.043716158 | 1.228377942  | -1.282077905 |
| PGD1    | YGL025C | 1.106166686  | -1.152271747 | -1.220522797 | 1.059231731  |
| TRP5    | YGL026C | 1.138309259  | -1.37599578  | -1.525094053 | 1.108356635  |
| CWH41   | YGL027C | -1.02379049  | -1.288654006 | -1.565284491 | 1.21466622   |
| SCW11   | YGL028C | 1.182232093  | -1.098111272 | -2.196543342 | 2.000292136  |
| CGR1    | YGL029W | -1.042703888 | -11.0420617  | -11.41816159 | 1.034060658  |
| RPL30   | YGL030W | -1.098484758 | -10.62201233 | -5.556846733 | -1.91151796  |
| RPL24A  | YGL031C | -1.438865322 | -10.06577212 | -4.627374296 | -2.175266463 |
| AGA2    | YGL032C | 1.147770455  | -2.54411398  | -2.390245487 | -1.06437351  |
| MIG1    | YGL035C | 1.063542402  | -1.532235805 | 1.180323525  | 1.298149     |
| YGL036W | YGL036W | 1.124158551  | 2.508633144  | 2.208817616  | 1.135735755  |
| PNC1    | YGL037C | -1.260371552 | 9.374764516  | 17.34810335  | -1.850510839 |
| OCH1    | YGL038C | 1.198599999  | -1.068279194 | -1.781992211 | 1.668095963  |
| YGL039W | YGL039W | 1.071329623  | -1.571237805 | -1.81168187  | 1.153028437  |
| HEM2    | YGL040C | 1.126459239  | -1.353497699 | -1.595029699 | 1.178450248  |
| DST1    | YGL043W | -1.228736241 | -1.309679459 | -1.257491553 | -1.041501596 |
| RNA15   | YGL044C | -1.111586104 | -1.311358349 | -1.517637934 | 1.157302223  |
| YGL045W | YGL045W | 1.109460454  | 2.365561818  | 2.573795763  | -1.088027268 |
| YGL047W | YGL047W | -1.23136702  | 2.106931155  | 3.056309592  | -1.45059775  |
| RPT6    | YGL048C | -1.105766042 | -1.161896229 | 1.093783772  | 1.062272324  |
| TIF4632 | YGL049C | 1.019804786  | -1.199432302 | 1.037431601  | 1.156155549  |
| YGL050W | YGL050W | -1.218132247 | -2.168384496 | -1.960716167 | -1.105914529 |
| YGL051W | YGL051W | -1.015866744 | -1.06363997  | 1.116469117  | -1.187521179 |
| YGL052W | YGL052W | -1.035118415 | -1.480286549 | -1.047933667 | 1.551242111  |
| PRM8    | YGL053W | -1.072248514 | -1.368310392 | 1.060154021  | 1.290671322  |
| ERV14   | YGL054C | 1.235569947  | -1.017307461 | -1.197717564 | 1.218447013  |
| OLE1    | YGL055W | 1.08321628   | -5.866651257 | -5.212297766 | -1.125540313 |
| SDS23   | YGL056C | -1.000998856 | -1.630608208 | -1.484185264 | -1.098655435 |
| YGL057C | YGL057C | 1.12459291   | -1.039717755 | -1.286744644 | 1.337851252  |
| RAD6    | YGL058W | -1.155703005 | -1.215395447 | 1.468633067  | -1.20835821  |
| YGL059W | YGL059W | -1.149494767 | 2.389986857  | 1.926113701  | 1.240833735  |
| YGL060W | YGL060W | -1.013832418 | -1.528464335 | -1.526016579 | -1.001604016 |
| DUO1    | YGL061C | -1.244308625 | -2.333149645 | -1.804935253 | -1.292650051 |
| PYC1    | YGL062W | 1.18599808   | 3.27924753   | 3.09574865   | 1.059274476  |
| PUS2    | YGL063W | 1.166077886  | -1.476517399 | -1.617705744 | 1.095622541  |
| MRH4    | YGL064C | -1.194732391 | -1.525854517 | -1.347448833 | -1.132402567 |
| ALG2    | YGL065C | 1.140418403  | -1.146522717 | -1.578336944 | 1.376629457  |

|         |         |              |              |              |              |
|---------|---------|--------------|--------------|--------------|--------------|
| SGF73   | YGL066W | -1.028833792 | -1.1851497   | 1.155897286  | 1.025307105  |
| NPY1    | YGL067W | 1.147872285  | -1.133607299 | -1.107324307 | -1.023735586 |
| YGL068W | YGL068W | -1.040565435 | -1.545305223 | -1.268678027 | -1.218043656 |
| RPB9    | YGL070C | -1.109816635 | -1.828285117 | -1.729341849 | -1.057214407 |
| RCS1    | YGL071W | -1.200463846 | -1.080256029 | -1.120528057 | 1.037280078  |
| YGL072C | YGL072C | 1.121958392  | -1.347295079 | 1.977750414  | -1.467941541 |
| HSF1    | YGL073W | -1.05319983  | -1.505976382 | 1.756638045  | -1.166444617 |
| MPS2    | YGL075C | -1.122297809 | -1.028783746 | 1.229994425  | -1.265398272 |
| RPL7A   | YGL076C | -1.009924762 | -8.564091774 | -5.066632856 | -1.690292551 |
| HNM1    | YGL077C | 1.443321342  | -1.696881027 | -1.97316962  | 1.162821429  |
| DBP3    | YGL078C | 1.059763003  | -28.69949745 | -48.52353966 | 1.690745273  |
| YGL079W | YGL079W | -1.032706441 | -1.086445726 | 1.096838167  | -1.00956554  |
| YGL080W | YGL080W | 1.213928045  | -1.115214318 | 1.090903078  | 1.022285426  |
| YGL081W | YGL081W | -2.042646895 | 2.069594934  | 4.426850906  | -2.138993883 |
| YGL082W | YGL082W | -1.227721846 | -1.30821187  | 1.545433896  | -1.181333033 |
| SCY1    | YGL083W | 1.202397638  | -1.619214373 | -2.411582278 | 1.489353305  |
| GUP1    | YGL084C | 1.096268144  | -1.405737954 | 1.171976088  | 1.199459587  |
| YGL085W | YGL085W | -1.128155092 | -1.026068417 | -1.096168428 | 1.124743804  |
| MAD1    | YGL086W | -1.053014983 | -1.106544926 | -1.181714762 | 1.067932024  |
| MMS2    | YGL087C | 1.023212936  | -1.514213155 | 1.932742063  | -1.276400259 |
| YGL088W | YGL088W | 1.398648905  | -1.912292105 | -1.612533095 | -1.185893245 |
| LIF1    | YGL090W | 1.041990154  | -1.497473958 | 1.774655941  | -1.185099702 |
| NBP35   | YGL091C | 1.009307432  | -1.385252189 | 1.175519897  | 1.178416625  |
| NUP145  | YGL092W | 1.069771118  | -1.706467363 | -1.617671197 | -1.054891356 |
| SPC105  | YGL093W | 1.057310327  | -1.973052106 | 1.927960125  | 1.023388441  |
| PAN2    | YGL094C | -1.132492433 | -1.309358014 | 1.235063345  | 1.060154541  |
| VPS45   | YGL095C | -1.112374118 | -1.210565507 | 1.023577662  | 1.182680661  |
| TOS8    | YGL096W | 1.0408223    | 2.182254184  | 2.250940353  | -1.031474871 |
| SRM1    | YGL097W | 1.033619797  | -1.897170406 | -1.969741554 | 1.038252309  |
| USE1    | YGL098W | -1.11284831  | -1.249702134 | 1.400319532  | -1.120522638 |
| LSG1    | YGL099W | -1.023888054 | -6.57132535  | -7.043581598 | 1.07186621   |
| SEH1    | YGL100W | -1.117116001 | -1.563448956 | -1.400667844 | -1.116216783 |
| YGL101W | YGL101W | -1.037561644 | -2.981286797 | -4.16311588  | 1.396415763  |
| YGL102C | YGL102C | 1.268953194  | -4.837461529 | -3.882889208 | -1.24584073  |
| RPL28   | YGL103W | -1.010912307 | -4.738537418 | -3.316919785 | -1.428595723 |
| VPS73   | YGL104C | -1.026603586 | 5.387618384  | 4.712856737  | 1.143174658  |
| ARC1    | YGL105W | -1.160574814 | -1.477527106 | -1.360152797 | -1.086294944 |
| MLC1    | YGL106W | -1.26458168  | -1.526496536 | 1.008559122  | -1.539562007 |
| RMD9    | YGL107C | -1.064832126 | -1.068471999 | -1.438594488 | 1.346403547  |
| YGL108C | YGL108C | -1.033336172 | -1.28875746  | 1.27584722   | 1.010118955  |
| CUE3    | YGL110C | 1.021301271  | -1.393191167 | 1.19101464   | 1.169751504  |
| NSA1    | YGL111W | -1.166810214 | -5.992112445 | -6.468915658 | 1.079571807  |
| TAF6    | YGL112C | -1.10451802  | -1.6254286   | -1.433148878 | -1.134165909 |
| SLD3    | YGL113W | -1.038479604 | -1.190601747 | -1.394413149 | 1.171183523  |
| YGL114W | YGL114W | 1.233099626  | -1.236826404 | -1.293617228 | 1.045916568  |
| SNF4    | YGL115W | -1.166082983 | -1.041634004 | 1.438140908  | -1.380658563 |
| CDC20   | YGL116W | -1.033986732 | -1.076440443 | -1.379551266 | 1.281586247  |
| YGL117W | YGL117W | -1.080498823 | -1.072292493 | 1.129145034  | -1.210773743 |
| ABC1    | YGL119W | -1.108404674 | -1.121604709 | -1.009211977 | -1.111366824 |

|         |         |              |              |              |              |
|---------|---------|--------------|--------------|--------------|--------------|
| PRP43   | YGL120C | 1.026397875  | -8.263409265 | -7.021212026 | -1.176920627 |
| GPG1    | YGL121C | -1.109116201 | 6.387758007  | 7.065824274  | -1.106150901 |
| NAB2    | YGL122C | -1.104046803 | -1.539333506 | -1.15768441  | -1.32966592  |
| MON1    | YGL124C | -1.185494532 | -1.038725439 | -1.034313166 | -1.004265896 |
| MET13   | YGL125W | 1.201450548  | -1.676126177 | 1.355910831  | 1.236162541  |
| SCS3    | YGL126W | 1.097743415  | -1.260651655 | 1.339937549  | -1.062892785 |
| SOH1    | YGL127C | -1.041994314 | -1.033075367 | 1.667472127  | -1.722624379 |
| CWC23   | YGL128C | -1.003484698 | -1.151251909 | 1.090574901  | 1.055637636  |
| RSM23   | YGL129C | -1.210608542 | -1.164998917 | 1.255747508  | -1.077895859 |
| CEG1    | YGL130W | -1.07636833  | -1.115757797 | 1.035756671  | -1.155653582 |
| SNT2    | YGL131C | 1.105029814  | 2.205524682  | 2.094748322  | 1.052882898  |
| ITC1    | YGL133W | 1.023888959  | 2.111569492  | 1.770638482  | 1.192546933  |
| PCL10   | YGL134W | -1.23251936  | -1.21856589  | -1.110042567 | -1.09776501  |
| RPL1B   | YGL135W | 1.184365978  | -9.0636493   | -7.915831092 | -1.145002868 |
| MRM2    | YGL136C | -1.138273915 | -1.269699551 | 1.410249702  | -1.110695597 |
| SEC27   | YGL137W | 1.026377372  | -1.267972953 | -1.23776082  | -1.0244087   |
| YGL139W | YGL139W | 1.369301265  | -1.134814923 | -1.882786735 | 1.659113479  |
| YGL140C | YGL140C | 1.337092517  | -1.171609139 | -1.140988868 | 1.336792985  |
| HUL5    | YGL141W | -1.015410765 | 2.421273299  | 2.493375353  | -1.029778568 |
| GPI10   | YGL142C | 1.277522751  | -1.057289175 | -1.267176697 | 1.339772206  |
| MRF1    | YGL143C | -1.185445651 | -1.303666116 | 1.071264008  | 1.216941955  |
| YGL144C | YGL144C | 1.09308791   | -1.849410526 | -2.031286969 | 1.098342926  |
| TIP20   | YGL145W | -1.188151325 | -1.68915339  | -1.739214451 | 1.029636776  |
| YGL146C | YGL146C | 1.018844829  | 2.613324527  | 3.080720293  | -1.178851022 |
| RPL9A   | YGL147C | -1.334601967 | -9.607447132 | -5.609454476 | -1.712723968 |
| ARO2    | YGL148W | -1.340917355 | -5.368795623 | -3.170425002 | -1.693399345 |
| INO80   | YGL150C | 1.059814111  | -1.078456667 | -1.005501417 | 1.084389707  |
| NUT1    | YGL151W | 1.032975565  | -1.15540343  | 1.01653116   | 1.136613884  |
| PEX14   | YGL153W | -1.256590489 | -1.434020116 | 1.567161188  | -1.092844633 |
| LYS5    | YGL154C | 1.177347443  | -1.37552605  | 1.26006803   | 1.091628401  |
| CDC43   | YGL155W | 1.062305794  | -1.44103516  | -1.578045752 | 1.095077897  |
| AMS1    | YGL156W | -1.224948951 | 7.004645853  | 7.801994809  | -1.113831445 |
| YGL157W | YGL157W | -1.441271215 | -1.1490162   | 1.694430263  | -1.474679177 |
| YGL159W | YGL159W | 1.175477499  | -1.171708275 | -1.139032583 | 1.334613903  |
| YGL160W | YGL160W | 1.184292201  | -1.595737756 | 1.167615849  | 1.366663323  |
| YGL161C | YGL161C | 1.027637217  | -1.530108455 | 1.491888774  | 1.025618318  |
| SUT1    | YGL162W | 1.39571991   | -1.256124888 | -2.111631239 | 1.68106791   |
| RAD54   | YGL163C | -1.05467929  | -1.565267561 | 1.83560234   | -1.17270835  |
| YGL164C | YGL164C | -1.244064091 | -1.188071822 | 1.472955257  | -1.239786374 |
| YGL165C | YGL165C | 1.209643654  | -1.215753935 | 1.534730446  | -1.262369302 |
| CUP2    | YGL166W | -1.235573052 | -1.743116283 | 2.282335382  | -1.309342012 |
| PMR1    | YGL167C | 1.246913691  | -1.66294988  | -1.656233594 | -1.004055156 |
| HUR1    | YGL168W | 1.229752024  | -1.904929673 | -1.277727801 | -1.490872838 |
| SUA5    | YGL169W | 1.270456022  | -5.312261135 | -7.816842487 | 1.471471806  |
| ROK1    | YGL171W | -1.14960575  | -20.39258483 | -17.61029253 | -1.157992396 |
| NUP49   | YGL172W | -1.145799578 | -1.044081068 | 1.439665124  | -1.378882509 |
| KEM1    | YGL173C | 1.01805118   | -1.503230284 | -1.409906608 | -1.066191388 |
| BUD13   | YGL174W | -1.128589958 | -1.025146771 | 1.083837815  | -1.057251358 |
| YGL176C | YGL176C | -1.09118133  | -1.110463804 | 1.078596836  | -1.197742745 |

|         |           |              |              |              |              |
|---------|-----------|--------------|--------------|--------------|--------------|
| MPT5    | YGL178W   | 1.357520504  | -1.473828394 | 1.104385117  | 1.334523955  |
| YGL179C | YGL179C   | -1.093711907 | -1.520321763 | 1.788094586  | -1.176129047 |
| APG1    | YGL180W   | -1.011775754 | 2.598642242  | 2.06380715   | 1.259149743  |
| GTS1    | YGL181W   | -1.098096122 | -1.106414361 | 1.352743248  | -1.222637102 |
| STR3    | YGL184C   | -1.000795365 | -1.11710587  | -1.084610151 | 1.211624367  |
| YGL185C | YGL185C   | -1.036249033 | 2.394707004  | 2.037324941  | 1.175417311  |
| YGL186C | YGL186C   | -1.036453478 | -1.216998309 | 1.031410568  | -1.255224918 |
| COX4    | YGL187C   | 1.330265407  | -1.445457342 | -1.042155948 | 1.506391966  |
| YGL188C | YGL188C   | 1.346565162  | -1.07071046  | -1.407320452 | 1.314380035  |
| RPS26A  | YGL189C   | -1.254336757 | -3.482122229 | -2.563579169 | -1.358304932 |
| CDC55   | YGL190C   | 1.150097704  | -1.488492945 | 1.332379629  | 1.117168795  |
| COX13   | YGL191W   | 1.140637297  | -1.524797186 | 1.807307731  | -1.185277457 |
| YGL193C | YGL193C   | 1.447919473  | -1.288055828 | 1.025962423  | 1.255461017  |
| HOS2    | YGL194C   | 1.1742256    | -1.76646031  | 1.248347392  | 1.415039053  |
| GCN1    | YGL195W   | 1.262636103  | -1.307810862 | -1.765946613 | 1.350307345  |
| YGL196W | YGL196W   | -1.077549822 | -1.457735935 | 1.479015311  | -1.014597552 |
| MDS3    | YGL197W   | 1.023887871  | -1.924974569 | 1.903785652  | 1.011129885  |
| YGL198W | YGL198W   | 1.070066327  | -1.488959113 | 1.654909907  | -1.111454232 |
| YGL199C | YGL199C   | 1.529811123  | -1.389799966 | -1.243128569 | 1.727700043  |
| EMP24   | YGL200C   | 1.129214886  | -1.409839238 | -1.076040435 | -1.310210279 |
| MCM6    | YGL201C   | -1.014116646 | -1.185721955 | -1.233804882 | 1.040551604  |
| ARO8    | YGL202W   | 1.065994877  | -1.540076513 | -1.378194471 | -1.117459506 |
| KEX1    | YGL203C   | 1.078688385  | -1.106256114 | -1.035174389 | 1.145167997  |
| YGL204C | YGL204C   | -1.027838779 | -1.404329449 | 1.113842114  | 1.260797586  |
| POX1    | YGL205W   | 1.363124491  | 4.977234702  | 4.378173526  | 1.136829016  |
| CHC1    | YGL206C   | 1.132609026  | -1.770829702 | 1.546226719  | 1.145258765  |
| SPT16   | YGL207W   | -1.052762432 | -1.118644201 | -1.145868018 | 1.024336439  |
| SIP2    | YGL208W   | -1.141786497 | 2.773465272  | 3.677967193  | -1.326127005 |
| MIG2    | YGL209W   | -1.009521282 | -3.79438587  | -4.185787326 | 1.103152782  |
| YPT32   | YGL210W   | -1.13905744  | -1.687379236 | -1.598352645 | -1.055698967 |
| YGL211W | YGL211W   | -1.02143711  | -1.69078247  | -1.85370927  | 1.096361775  |
| VAM7    | YGL212W   | 1.117317646  | -1.010413935 | 1.061000069  | -1.072049255 |
| SKI8    | YGL213C   | 1.246820022  | -1.24523867  | -1.666512247 | 1.338307496  |
| CLG1    | YGL215W   | 1.252834367  | -1.020204559 | -1.435341087 | 1.406914991  |
| KIP3    | YGL216W   | -1.05278947  | -1.273311326 | -1.064942199 | -1.195662382 |
| YGL217C | YGL217C   | 1.524990214  | -1.334377559 | -1.545525263 | 1.158236852  |
| MMM2    | YGL219C   | -1.054307005 | -1.591788887 | 1.768176899  | -1.110811184 |
| YGL220W | YGL220W   | 1.002574481  | -1.661403744 | -1.035053536 | -1.605137982 |
| NIF3    | YGL221C   | -1.159675199 | -1.034031173 | 1.144466964  | -1.183414517 |
| EDC1    | YGL222C   | 1.158695707  | -1.542449398 | 1.53523116   | 1.004701728  |
| COG1    | YGL223C   | -1.12448005  | -1.015392496 | -1.182581551 | 1.16465461   |
| SDT1    | YGL224C   | 1.071566425  | -1.438990631 | -1.931369061 | 1.342169309  |
| VRG4    | YGL225W   | -1.142001745 | -2.670120842 | -2.624862508 | -1.017242173 |
| OST5    | YGL226C-A | 1.181238708  | -1.69486132  | -1.101078065 | -1.539274438 |
| YGL226W | YGL226W   | -1.094212708 | -1.054443576 | 1.310745065  | -1.382106713 |
| VID30   | YGL227W   | -1.025008943 | 3.855467851  | 3.702805405  | 1.04122886   |
| SHE10   | YGL228W   | -1.15318256  | -1.188942792 | 1.146948206  | 1.036614196  |
| SAP4    | YGL229C   | 1.107040167  | 2.132472652  | 1.420079302  | 1.501657443  |
| YGL230C | YGL230C   | -1.022663255 | -1.102669344 | -1.009714253 | -1.092060789 |



|           |           |              |              |              |              |
|-----------|-----------|--------------|--------------|--------------|--------------|
| YGL231C   | YGL231C   | -1.14225268  | -1.784450512 | -1.471399064 | -1.212757677 |
| YGL232W   | YGL232W   | -1.02586515  | -1.201078146 | -1.458013408 | 1.21392052   |
| SEC15     | YGL233W   | -1.134330054 | -1.230201546 | 1.175784661  | 1.046281336  |
| ADE5,7    | YGL234W   | 1.314629465  | -3.687928859 | -4.720264764 | 1.279922945  |
| MTO1      | YGL236C   | -1.037551801 | -3.068825482 | -3.036492084 | -1.010648274 |
| HAP2      | YGL237C   | -1.027401708 | 2.189722435  | 1.917656712  | 1.141874049  |
| CSE1      | YGL238W   | 1.125332008  | -1.197276727 | -1.245941811 | 1.04064648   |
| DOC1      | YGL240W   | 1.295843474  | -1.270787376 | -1.168935548 | 1.485468539  |
| KAP114    | YGL241W   | -1.083074146 | -1.708689118 | -1.665496768 | -1.025933614 |
| YGL242C   | YGL242C   | -1.203906641 | -1.309024996 | 1.566661771  | -1.196815779 |
| TAD1      | YGL243W   | -1.16535407  | -1.556136131 | -1.674680685 | 1.076178781  |
| RTF1      | YGL244W   | -1.070707371 | -1.246646299 | -1.193782152 | -1.04428291  |
| YGL245W   | YGL245W   | 1.03311215   | -1.264989522 | -1.333457937 | 1.054125677  |
| RAI1      | YGL246C   | -1.022011529 | -1.654676052 | -2.10932107  | 1.274763762  |
| BRR6      | YGL247W   | 1.006829566  | -1.457104754 | -1.423268327 | -1.023773751 |
| PDE1      | YGL248W   | -1.218427101 | 2.18069953   | 2.268466482  | -1.040247155 |
| YGL250W   | YGL250W   | -1.044381725 | -1.953405338 | 2.627485959  | -1.345079747 |
| HFM1      | YGL251C   | 1.212314543  | -1.624898319 | 1.135114727  | 1.431483779  |
| RTG2      | YGL252C   | -1.098265715 | -1.091907161 | 1.107890253  | -1.014637775 |
| HXX2      | YGL253W   | -1.053102644 | -1.572721132 | -1.147095435 | -1.371046457 |
| FZF1      | YGL254W   | -1.043040274 | -1.0177903   | -1.071891791 | 1.053155832  |
| ZRT1      | YGL255W   | 1.638349151  | -2.028448506 | -2.688672539 | 1.325482274  |
| ADH4      | YGL256W   | 1.224489233  | -1.337748081 | -1.782925382 | 1.332781117  |
| MNT2      | YGL257C   | -1.122544423 | -2.193739282 | -1.820455623 | -1.205049579 |
| YGL258W   | YGL258W   | -1.027053195 | -1.13610413  | -1.932464554 | 1.700957248  |
| YGL258W-A | YGL258W-A | -2.086988218 | 3.869333391  | 5.734468965  | -1.482030206 |
| YPS5      | YGL259W   | 1.004189017  | 2.602529608  | 2.030792202  | 1.281534174  |
| YGL261C   | YGL261C   | 1.091072466  | -1.055627442 | -1.07702157  | 1.020266742  |
| COS12     | YGL263W   | -2.083839994 | -1.069630467 | -2.157453475 | 2.307677968  |
| YGR001C   | YGR001C   | -1.069886126 | -1.787082134 | -1.66134986  | -1.075680793 |
| GOD1      | YGR002C   | -1.103448573 | -1.222377753 | 1.133291093  | 1.078608808  |
| YGR003W   | YGR003W   | -1.013181926 | -1.43758301  | -1.672057053 | 1.163102959  |
| YGR004W   | YGR004W   | 1.117842481  | -1.245480048 | -1.397445721 | 1.122013736  |
| TFG2      | YGR005C   | -1.124506462 | -1.17150958  | -1.129401671 | -1.037283378 |
| PRP18     | YGR006W   | -1.232533434 | -1.250066569 | 1.237019126  | 1.010547487  |
| MUQ1      | YGR007W   | -1.132685808 | -1.551524031 | -1.642840183 | 1.058855776  |
| STF2      | YGR008C   | -1.241082991 | 11.34353014  | 14.68008019  | -1.294136835 |
| SEC9      | YGR009C   | 1.010054788  | -1.521772351 | 1.673606607  | -1.099774619 |
| NMA2      | YGR010W   | -1.085806496 | -1.370801569 | 1.38076836   | -1.007270776 |
| YGR011W   | YGR011W   | -1.248308467 | -1.116084039 | 1.596164601  | -1.430147323 |
| YGR012W   | YGR012W   | -1.14113084  | -1.333321703 | 1.381159931  | -1.035878984 |
| SNU71     | YGR013W   | 1.065842067  | -1.301427092 | 1.196213399  | 1.087955622  |
| MSB2      | YGR014W   | 1.428777424  | -1.529922646 | -2.28774348  | 1.495332778  |
| YGR015C   | YGR015C   | 1.114314369  | -1.05592236  | -1.135555117 | 1.199058039  |
| YGR016W   | YGR016W   | 1.049087093  | -1.477338477 | 1.245177117  | 1.186448463  |
| YGR017W   | YGR017W   | -1.134434484 | -1.151530764 | -1.092647877 | -1.053890085 |
| UGA1      | YGR019W   | -1.014453013 | 3.300918631  | 3.070691407  | 1.074975696  |
| VMA7      | YGR020C   | -1.064082765 | -1.907913079 | -1.529705415 | -1.247242155 |
| YGR021W   | YGR021W   | -1.106856864 | 2.074804036  | 2.113619109  | -1.018707826 |

|               |                |              |              |              |              |
|---------------|----------------|--------------|--------------|--------------|--------------|
| MTL1          | YGR023W        | -1.065059253 | 4.009918826  | 5.513579507  | -1.374985316 |
| YGR024C       | YGR024C        | -1.26309504  | -2.029013698 | -1.641115662 | -1.2363624   |
| YGR026W       | YGR026W        | 1.24285138   | -1.278261687 | 1.317164785  | -1.030434378 |
| RPS25A        | YGR027C        | 1.208677657  | -5.224603296 | -4.919228845 | -1.062077708 |
| MSP1          | YGR028W        | -1.095882322 | -1.70369666  | 1.994611316  | -1.17075496  |
| ERV1          | YGR029W        | -1.201165177 | -1.231767131 | -1.127359794 | -1.092612259 |
| POP6          | YGR030C        | -1.038254881 | -1.934654245 | -2.158096359 | 1.115494598  |
| YGR031W       | YGR031W        | -1.012012324 | -1.25461556  | 1.197720013  | 1.047503211  |
| GSC2          | YGR032W        | 1.228277715  | -1.912783669 | 2.121404023  | -1.109066361 |
| YGR033C       | YGR033C        | -1.232366208 | -1.366620183 | -1.27205625  | -1.074339427 |
| <b>RPL26B</b> | <b>YGR034W</b> | 1.043571253  | -15.69555527 | -11.38386471 | -1.378754551 |
| YGR035C       | YGR035C        | -1.220546717 | -3.520140311 | -2.524863919 | -1.394190112 |
| CAX4          | YGR036C        | 1.40674808   | -1.459719023 | -1.006525166 | 1.469243932  |
| ACB1          | YGR037C        | 1.03471899   | -1.989041489 | -1.582170318 | -1.257160159 |
| ORM1          | YGR038W        | 1.046716707  | -1.090477262 | -1.269830421 | 1.164472168  |
| KSS1          | YGR040W        | 1.06563424   | -1.348197427 | -1.918846013 | 1.42326782   |
| BUD9          | YGR041W        | 1.043345853  | -1.737892694 | -2.479294482 | 1.426609647  |
| YGR042W       | YGR042W        | -1.021749891 | -1.234374759 | -1.288770631 | 1.04406755   |
| YGR043C       | YGR043C        | -1.35867364  | 35.12150516  | 44.86964411  | -1.277554703 |
| RME1          | YGR044C        | -1.225900356 | 2.241671328  | 1.906930374  | 1.175539159  |
| YGR045C       | YGR045C        | 1.099027057  | -1.197958739 | -1.473997765 | 1.230424486  |
| YGR046W       | YGR046W        | -1.097314749 | -1.278956348 | 1.218700904  | 1.049442357  |
| TFC4          | YGR047C        | -1.083057393 | -1.364499342 | -1.047892201 | -1.302137129 |
| UFD1          | YGR048W        | -1.068464615 | -1.558592402 | 1.342260641  | 1.161169712  |
| SCM4          | YGR049W        | -1.349296652 | -2.450066372 | -1.773834172 | -1.381226278 |
| YGR050C       | YGR050C        | -1.007605232 | -1.27649337  | 1.70310508   | -1.334205975 |
| YGR052W       | YGR052W        | 1.04639706   | 7.005555917  | 9.66389308   | -1.379461272 |
| YGR053C       | YGR053C        | -1.08976315  | 2.016290009  | 1.590023646  | 1.268088065  |
| YGR054W       | YGR054W        | 1.232370741  | -1.15319435  | -1.560410211 | 1.353119889  |
| MUP1          | YGR055W        | 1.15303312   | -1.926640028 | -2.266774432 | 1.17654279   |
| RSC1          | YGR056W        | 1.169641355  | -1.153375283 | -1.32328091  | 1.526239495  |
| LST7          | YGR057C        | -1.175260542 | -1.531168742 | -1.451210686 | -1.055097483 |
| YGR058W       | YGR058W        | -1.055672237 | -1.183050403 | -1.293218185 | 1.093121799  |
| ERG25         | YGR060W        | 1.15284029   | -2.71657981  | -2.704520994 | -1.004458762 |
| ADE6          | YGR061C        | 1.152264266  | -4.145830551 | -4.980468452 | 1.20131983   |
| COX18         | YGR062C        | 1.155941312  | -1.422078965 | 1.217609425  | 1.167927035  |
| SPT4          | YGR063C        | 1.161655137  | -2.302780545 | -1.414731571 | -1.627715528 |
| VHT1          | YGR065C        | 1.111098095  | -2.347338628 | -2.886225063 | 1.229573368  |
| YGR066C       | YGR066C        | 1.188151702  | 15.21786197  | 14.14188502  | 1.076084408  |
| YGR067C       | YGR067C        | 1.419164118  | -1.362844779 | -1.083035054 | 1.476008668  |
| YGR068C       | YGR068C        | 1.193814311  | -1.347108974 | -1.13127779  | 1.523954462  |
| ROM1          | YGR070W        | -1.07770243  | 6.265761995  | 7.392346469  | -1.179800074 |
| YGR071C       | YGR071C        | 1.038915423  | -1.816516589 | -1.691474452 | -1.073924933 |
| UPF3          | YGR072W        | -1.129921594 | -1.458806626 | -1.261202462 | -1.156679177 |
| YGR073C       | YGR073C        | 1.031076418  | -1.085659546 | 1.018946363  | 1.065472714  |
| SMD1          | YGR074W        | -1.151220773 | -2.766769248 | -2.235341394 | -1.237739012 |
| PRP38         | YGR075C        | 1.006997905  | -1.045408838 | -1.261821263 | 1.319119101  |
| MRPL25        | YGR076C        | 1.093754551  | -1.056611349 | -1.156533389 | 1.222006304  |
| PEX8          | YGR077C        | 1.23066705   | -1.767709148 | 1.299696049  | 1.360094269  |

|           |           |              |              |              |              |
|-----------|-----------|--------------|--------------|--------------|--------------|
| PAC10     | YGR078C   | -1.002872561 | -2.037165863 | -1.893581082 | -1.07582711  |
| YGR079W   | YGR079W   | -1.067343233 | -5.169580239 | -7.011876256 | 1.356372458  |
| TWF1      | YGR080W   | -1.150091783 | -1.711982642 | 1.660342882  | 1.031101865  |
| YGR081C   | YGR081C   | -1.011259822 | -4.467798539 | -5.250243202 | 1.1751298    |
| TOM20     | YGR082W   | 1.088274799  | -1.882511693 | -1.951723112 | 1.036765465  |
| GCD2      | YGR083C   | -1.110325568 | -3.284237458 | -3.219803528 | -1.020011758 |
| MRP13     | YGR084C   | -1.083970071 | -1.064049366 | -1.505150415 | 1.414549421  |
| RPL11B    | YGR085C   | -1.095582243 | -8.932477046 | -7.214157985 | -1.238187058 |
| YGR086C   | YGR086C   | 1.02298077   | 2.567146828  | 2.648474403  | -1.031680142 |
| PDC6      | YGR087C   | -1.033814862 | 2.911417419  | 2.068719429  | 1.407352479  |
| CTT1      | YGR088W   | 1.138846422  | 62.23645973  | 68.79986813  | -1.105459218 |
| YGR089W   | YGR089W   | 1.304187627  | -1.080161194 | -1.681187743 | 1.556423016  |
| UTP22     | YGR090W   | 1.142262446  | -4.304412298 | -5.572993563 | 1.294716486  |
| PRP31     | YGR091W   | -1.17878748  | -1.331544361 | -1.486088797 | 1.116064055  |
| DBF2      | YGR092W   | 1.00349463   | -1.322140035 | 1.438733825  | -1.088185659 |
| YGR093W   | YGR093W   | -1.16381607  | -2.191323664 | -2.381063247 | 1.086586745  |
| VAS1      | YGR094W   | 1.06755968   | -3.702712167 | -4.062311478 | 1.097117814  |
| RRP46     | YGR095C   | -1.308321488 | -2.664935572 | -2.124561691 | -1.254346054 |
| YGR096W   | YGR096W   | 1.106232515  | -2.541940226 | -2.555727705 | 1.005423998  |
| ASK10     | YGR097W   | 1.094466713  | -1.420209341 | 1.424609044  | -1.003097926 |
| ESP1      | YGR098C   | 1.023975361  | -1.104107414 | 1.003746838  | -1.108244326 |
| TEL2      | YGR099W   | 1.058890793  | -1.005908797 | 1.047736247  | -1.041581752 |
| MDR1      | YGR100W   | -1.09954262  | -1.700826864 | 1.545370161  | 1.100595125  |
| PCP1      | YGR101W   | 1.223238778  | -1.507666291 | 1.333224474  | 1.130842045  |
| YGR102C   | YGR102C   | 1.007944019  | -1.043752408 | 1.153859731  | -1.105491803 |
| NOP7      | YGR103W   | 1.0352271    | -40.41874436 | -32.51454714 | -1.243097256 |
| SRB5      | YGR104C   | -1.021458061 | -1.070423153 | -1.189087291 | 1.110857223  |
| VMA21     | YGR105W   | 1.100103844  | -3.472757116 | -2.348180262 | -1.478914193 |
| YGR106C   | YGR106C   | 1.26556113   | -1.73066317  | -2.049631944 | 1.184304364  |
| CLB1      | YGR108W   | -1.156630016 | -1.896062625 | -2.290999766 | 1.2082933    |
| CLB6      | YGR109C   | -1.053824392 | -2.662845744 | -4.152099283 | 1.559271426  |
| YGR110W   | YGR110W   | -1.278903857 | 5.247043098  | 6.275083585  | -1.195927586 |
| YGR111W   | YGR111W   | -1.132962516 | 2.803553547  | 2.901293185  | -1.034862768 |
| SHY1      | YGR112W   | -1.228320796 | 2.241733165  | 2.074628701  | 1.080546685  |
| DAM1      | YGR113W   | -1.029609257 | -1.072265091 | -1.247860968 | 1.338037754  |
| SPT6      | YGR116W   | -1.052793661 | -1.593806151 | -1.33434703  | -1.194446508 |
| YGR117C   | YGR117C   | -1.424382185 | -1.293505135 | -1.184098722 | -1.092396361 |
| RPS23A    | YGR118W   | -1.243851762 | -6.724157152 | -3.815321062 | -1.762409255 |
| NUP57     | YGR119C   | -1.13422965  | -1.778949651 | -1.397864732 | -1.27261931  |
| COG2      | YGR120C   | -1.275853416 | -1.336562795 | -1.252289067 | -1.067295747 |
| MEP1      | YGR121C   | 1.320074429  | 3.040272164  | 3.225582659  | -1.060951943 |
| YGR122C-A | YGR122C-A | -1.138773805 | -1.164902933 | 1.569929671  | -1.347691404 |
| YGR122W   | YGR122W   | -1.245719679 | -1.109045928 | -1.153814156 | 1.040366433  |
| PPT1      | YGR123C   | -1.012670641 | -15.20535318 | -15.83581653 | 1.041463249  |
| ASN2      | YGR124W   | -1.062683144 | -1.929379201 | -1.627871749 | -1.185215729 |
| YGR125W   | YGR125W   | 1.221560911  | -1.70993169  | 1.151464753  | 1.485005673  |
| YGR127W   | YGR127W   | -1.060698948 | 3.914608799  | 4.293344152  | -1.096749221 |
| UTP8      | YGR128C   | -1.026482748 | -33.39111911 | -34.22943032 | 1.025105813  |
| SYF2      | YGR129W   | -1.174228508 | -1.851556057 | -1.730002559 | -1.070262034 |

|         |         |              |              |              |              |
|---------|---------|--------------|--------------|--------------|--------------|
| YGR130C | YGR130C | 1.037734333  | 3.470539453  | 3.783301088  | -1.090119026 |
| YGR131W | YGR131W | 1.021674628  | -1.875698213 | 1.94133576   | -1.03499366  |
| PHB1    | YGR132C | -1.141325983 | -1.297792671 | 1.270051752  | 1.021842354  |
| PEX4    | YGR133W | -1.159749143 | -1.508160275 | -1.053214013 | -1.431959939 |
| CAF130  | YGR134W | 1.040814858  | -1.211027909 | -1.109921419 | -1.091093376 |
| PRE9    | YGR135W | -1.178872066 | -1.096014982 | 1.096291485  | -1.00025228  |
| LSB1    | YGR136W | 1.018170995  | 3.545185508  | 3.287068753  | 1.078524903  |
| YGR137W | YGR137W | -1.024219232 | 3.354644485  | 4.103810844  | -1.223322132 |
| TPO2    | YGR138C | 1.547229001  | 2.464100991  | 2.203940798  | 1.118043186  |
| CBF2    | YGR140W | -1.038531953 | -2.234766351 | -2.36032377  | 1.05618369   |
| VPS62   | YGR141W | 1.113346286  | -3.374634167 | -4.352326137 | 1.289717913  |
| BTN2    | YGR142W | -1.072544699 | 24.95776697  | 45.36184329  | -1.817544147 |
| SKN1    | YGR143W | 1.136025865  | 2.182200841  | 1.909580483  | 1.142764529  |
| THI4    | YGR144W | -1.03437524  | -1.047954095 | 1.225910266  | -1.169812945 |
| ENP2    | YGR145W | -1.079020306 | -22.14277564 | -16.04430952 | -1.380101502 |
| YGR146C | YGR146C | 1.462597968  | 2.933263728  | 2.529985488  | 1.159399428  |
| NAT2    | YGR147C | -1.208584093 | -1.342097665 | -1.120241803 | -1.198042835 |
| RPL24B  | YGR148C | -1.242183356 | -6.863680225 | -3.387460289 | -2.026202417 |
| YGR149W | YGR149W | 1.121995979  | 3.674540102  | 2.690681877  | 1.365653865  |
| YGR150C | YGR150C | -1.259853894 | -1.211058914 | -1.414330509 | 1.167846166  |
| YGR151C | YGR151C | -1.009468365 | -2.372804899 | -2.401898259 | 1.012261168  |
| RSR1    | YGR152C | -1.019606185 | -2.452868482 | -2.592344671 | 1.056862482  |
| YGR153W | YGR153W | -1.168007134 | -1.57083931  | 1.956632747  | -1.24559701  |
| YGR154C | YGR154C | -1.194696541 | -1.027294195 | 1.195133298  | -1.163379784 |
| CYS4    | YGR155W | 1.082599266  | -2.576592628 | -2.813299029 | 1.091867996  |
| PTI1    | YGR156W | 1.089569786  | -1.754155333 | -2.44576153  | 1.394267362  |
| CHO2    | YGR157W | 1.25980916   | -1.186555241 | -2.006122515 | 1.690711437  |
| MTR3    | YGR158C | -1.214574127 | -6.347590337 | -6.459621424 | 1.017649388  |
| NSR1    | YGR159C | 1.008148585  | -37.88497937 | -25.71947518 | -1.473007482 |
| FYV13   | YGR160W | 1.037573812  | -3.607437741 | -3.286336432 | -1.097707983 |
| YGR161C | YGR161C | 1.054211394  | 4.621497895  | 6.338999736  | -1.371633155 |
| TIF4631 | YGR162W | 1.039294846  | -7.904480338 | -8.971675121 | 1.135011378  |
| GTR2    | YGR163W | -1.09933545  | -1.05462903  | 1.034932077  | -1.091469412 |
| YGR165W | YGR165W | -1.195917153 | -1.048615529 | -1.085439689 | 1.035116932  |
| KRE11   | YGR166W | 1.005788558  | -1.497905884 | -1.772640379 | 1.183412388  |
| CLC1    | YGR167W | -1.240347157 | -1.499863545 | 1.347057815  | 1.113436652  |
| YGR168C | YGR168C | -1.198765667 | -1.159430394 | -1.035496091 | -1.119685921 |
| PUS6    | YGR169C | -1.095102565 | -1.117045747 | -1.332987699 | 1.193315227  |
| PSD2    | YGR170W | -1.07117601  | -1.27705589  | 1.257643342  | 1.015435655  |
| MSM1    | YGR171C | -1.144267174 | -1.057768904 | -1.033668044 | 1.093381913  |
| YIP1    | YGR172C | 1.352066753  | -2.014617007 | -2.296036864 | 1.139689011  |
| YGR173W | YGR173W | -1.255430633 | -6.982837577 | -7.148960515 | 1.023790176  |
| CBP4    | YGR174C | -1.065159405 | 2.21104259   | 3.275956025  | -1.481634067 |
| ERG1    | YGR175C | 1.26684878   | -1.800691536 | -2.566521907 | 1.425297924  |
| ATF2    | YGR177C | 1.220376648  | -10.60489707 | -13.39930894 | 1.263502027  |
| PBP1    | YGR178C | -1.016462555 | -1.178036198 | 1.148382267  | 1.025822352  |
| OKP1    | YGR179C | -1.22845652  | -1.102714035 | -1.026217456 | -1.074542269 |
| RNR4    | YGR180C | 1.22778896   | -1.801051802 | -1.328162397 | -1.35604788  |
| TIM13   | YGR181W | 1.042912499  | -1.688382649 | -1.699064479 | 1.006326664  |

|         |         |              |              |              |              |
|---------|---------|--------------|--------------|--------------|--------------|
| YGR182C | YGR182C | 1.130268379  | -1.518566809 | 1.007473622  | -1.529916003 |
| QCR9    | YGR183C | 1.279192463  | -1.73327872  | 2.531071798  | -1.46027974  |
| UBR1    | YGR184C | 1.160026016  | -1.257916172 | 1.06119315   | 1.185379092  |
| TYS1    | YGR185C | 1.021817494  | -1.813524616 | -2.497217798 | 1.376996913  |
| TFG1    | YGR186W | 1.029929946  | -1.213543483 | 1.189759413  | 1.019990655  |
| HGH1    | YGR187C | -1.205741164 | -6.952491371 | -7.915092009 | 1.138454057  |
| BUB1    | YGR188C | -1.184920679 | -1.520898005 | -1.238731047 | -1.227787104 |
| CRH1    | YGR189C | 1.123965533  | -1.083657129 | -1.154480421 | 1.065355812  |
| HIP1    | YGR191W | 1.160365681  | -1.939761941 | -2.456931277 | 1.266614848  |
| TDH3    | YGR192C | 1.20430585   | -1.380314956 | 1.493621499  | -2.061668094 |
| PDX1    | YGR193C | -1.062108302 | -1.277119094 | 1.302208851  | -1.019645589 |
| XKS1    | YGR194C | -1.120994288 | 5.282119725  | 5.987572669  | -1.133554895 |
| SKI6    | YGR195W | -1.263651384 | -2.183356049 | -1.969332741 | -1.108678084 |
| FYV8    | YGR196C | 1.006163156  | -1.353460922 | 1.240250094  | 1.091280644  |
| SNG1    | YGR197C | 1.131816477  | -1.464017583 | 1.910536581  | -1.304995652 |
| YGR198W | YGR198W | -1.126746421 | -1.45276182  | -1.13680334  | -1.277935917 |
| PMT6    | YGR199W | 1.116798494  | -1.325567781 | 1.297492654  | 1.021637985  |
| ELP2    | YGR200C | 1.040939126  | -12.09886918 | -13.31335152 | 1.100379823  |
| YGR201C | YGR201C | -1.031051049 | 3.093762187  | 2.7394048    | 1.129355613  |
| PCT1    | YGR202C | -1.167789673 | -1.032793119 | 1.057198794  | -1.09186764  |
| YGR203W | YGR203W | 1.392454847  | -1.406923652 | 1.029406861  | 1.366732344  |
| ADE3    | YGR204W | 1.04435992   | -1.281034733 | -1.265849241 | -1.011996288 |
| YGR205W | YGR205W | 1.00868424   | 4.429721369  | 4.639027137  | -1.047250323 |
| YGR206W | YGR206W | 1.062537951  | -1.061833254 | 1.455229217  | -1.545210775 |
| YGR207C | YGR207C | -1.089088668 | -1.404594716 | 1.251800531  | 1.122059531  |
| SER2    | YGR208W | -1.167779012 | -2.052442711 | -1.637608106 | -1.253317386 |
| TRX2    | YGR209C | 1.380702291  | -1.183076463 | 1.530368208  | -1.293549703 |
| YGR210C | YGR210C | -1.056946519 | -1.183129616 | 1.910574645  | -1.614848127 |
| ZPR1    | YGR211W | -1.039002802 | -1.954294044 | 4.073786327  | -2.084530903 |
| YGR212W | YGR212W | -1.4447155   | -1.147451711 | 1.579264482  | -1.376323263 |
| RTA1    | YGR213C | 1.364482436  | 3.386190893  | 2.326452131  | 1.455517115  |
| RPSOA   | YGR214W | -1.129567643 | -8.522865978 | -6.570789028 | -1.297084101 |
| RSM27   | YGR215W | -1.078236971 | -1.24790092  | 1.12568415   | -1.404742287 |
| GPI1    | YGR216C | 1.333942355  | -1.587231882 | -2.003086892 | 1.262000162  |
| CCH1    | YGR217W | 1.170451508  | -1.393946133 | -1.601250201 | 1.148717417  |
| CRM1    | YGR218W | 1.262400803  | -1.275848293 | -1.137254837 | 1.450964643  |
| MRPL9   | YGR220C | -1.021947519 | -1.216889251 | 1.053436466  | 1.155161502  |
| TOS2    | YGR221C | 1.169624332  | -3.567895006 | -4.597915546 | 1.288691382  |
| PET54   | YGR222W | -1.146917032 | -1.07278338  | -1.126441209 | 1.208427408  |
| YGR223C | YGR223C | -1.004588667 | -1.533015067 | 1.413114292  | 1.084848604  |
| AMA1    | YGR225W | -2.058697288 | 5.211923293  | 3.817318303  | 1.365336312  |
| DIE2    | YGR227W | 1.275625702  | -1.051725699 | -1.666167336 | 1.584222329  |
| SMI1    | YGR229C | 1.003251396  | -1.732282052 | -2.046782559 | 1.181552713  |
| BNS1    | YGR230W | -1.144647665 | -1.344069456 | 1.189713674  | 1.129741959  |
| PHB2    | YGR231C | -1.124779127 | -1.32716856  | 1.469886917  | -1.107535969 |
| NAS6    | YGR232W | 1.14673043   | -1.211714967 | 1.236548585  | -1.020494604 |
| PHO81   | YGR233C | -1.053311951 | -1.428239847 | -1.596963336 | 1.118133862  |
| YHB1    | YGR234W | -1.008251879 | -7.795090659 | -6.800697712 | -1.146219254 |
| YGR235C | YGR235C | -1.245733719 | -1.212255666 | 1.495014945  | -1.233250531 |

|           |           |              |              |              |              |
|-----------|-----------|--------------|--------------|--------------|--------------|
| SPG1      | YGR236C   | -1.296930063 | 2.530179908  | 2.772250985  | -1.095673464 |
| YGR237C   | YGR237C   | 1.081505714  | 3.022288902  | 2.181869315  | 1.385183284  |
| KEL2      | YGR238C   | -1.0046741   | -1.659604112 | 1.490240897  | 1.113648213  |
| PEX21     | YGR239C   | -1.217246085 | -1.372470324 | 1.152199608  | -1.58135977  |
| PFK1      | YGR240C   | 1.058206249  | -1.840272082 | -1.732538281 | -1.062182638 |
| YAP1802   | YGR241C   | 1.002304756  | -1.607092686 | 1.328818408  | 1.209414828  |
| YGR243W   | YGR243W   | 1.027222492  | 5.422202114  | 6.818062708  | -1.257434261 |
| LSC2      | YGR244C   | -1.135518946 | 2.682201019  | 2.314942111  | 1.158647124  |
| SDA1      | YGR245C   | -1.054708738 | -16.47175509 | -13.3883494  | -1.23030514  |
| BRF1      | YGR246C   | -1.138185043 | -1.238686728 | -1.23301456  | -1.004600244 |
| CPD1      | YGR247W   | 1.084892995  | -1.031152923 | 1.169445048  | -1.13411408  |
| SOL4      | YGR248W   | -1.349652795 | 45.66783438  | 78.10001975  | -1.710175681 |
| YGR250C   | YGR250C   | -1.093201591 | 10.78663585  | 19.83328603  | -1.838690608 |
| YGR251W   | YGR251W   | -1.263992648 | -4.335087158 | -3.091142968 | -1.402422082 |
| GCN5      | YGR252W   | -1.135998923 | -1.149238918 | -1.12322661  | -1.023158558 |
| PUP2      | YGR253C   | -1.081478153 | -1.408427292 | 1.380002647  | 1.02059753   |
| ENO1      | YGR254W   | -1.050064448 | -1.157507942 | 1.817128538  | -1.569862696 |
| COQ6      | YGR255C   | 1.177805881  | 2.629133429  | 2.169432722  | 1.211899038  |
| GND2      | YGR256W   | 1.339845304  | 10.35154102  | 13.27185231  | -1.282113677 |
| YGR257C   | YGR257C   | -1.173608884 | -1.400945173 | -1.172817873 | -1.194512127 |
| RAD2      | YGR258C   | -1.046276414 | 2.057891587  | 1.964719656  | 1.047422506  |
| YGR259C   | YGR259C   | 1.489551863  | -1.46522939  | -1.140947707 | 1.671750112  |
| TNA1      | YGR260W   | 1.420309839  | -1.286632561 | -1.427570015 | 1.836758063  |
| APL6      | YGR261C   | -1.120907551 | -1.400242584 | -1.391572515 | -1.006230411 |
| BUD32     | YGR262C   | -1.043969983 | -2.418085412 | -2.12219515  | -1.13942651  |
| YGR263C   | YGR263C   | 1.1142392    | -1.181778373 | 1.105526985  | 1.068972889  |
| MES1      | YGR264C   | 1.067399985  | -3.791091423 | -4.125963513 | 1.088331315  |
| YGR266W   | YGR266W   | -1.269898883 | -1.168493164 | 1.883581495  | -1.611974767 |
| FOL2      | YGR267C   | 1.042581457  | -1.051578769 | -1.069724605 | 1.017255802  |
| YGR268C   | YGR268C   | 1.013578962  | 3.217194895  | 5.458199788  | -1.696571071 |
| YTA7      | YGR270W   | 1.019299862  | -1.690247633 | 1.555740939  | 1.086458285  |
| YGR271C-A | YGR271C-A | 1.015339183  | -6.502998417 | -7.374450434 | 1.134007724  |
| SLH1      | YGR271W   | 1.109969346  | -1.184028009 | 1.031598312  | 1.147760707  |
| YGR272C   | YGR272C   | 1.046431666  | -4.505704236 | -6.770467743 | 1.502643624  |
| TAF1      | YGR274C   | -1.093204226 | -1.117062303 | -1.009331221 | -1.106735112 |
| RTT102    | YGR275W   | -1.321856114 | -1.611595513 | -1.041224819 | -1.547788224 |
| RNH70     | YGR276C   | 1.05608417   | -1.224356025 | -1.555116675 | 1.27015071   |
| YGR277C   | YGR277C   | -1.153862036 | -1.172715181 | 1.50042686   | -1.279446948 |
| CWC22     | YGR278W   | -1.022553446 | -1.30091274  | 1.192551457  | 1.090865079  |
| SCW4      | YGR279C   | 1.026168445  | -1.310594461 | -1.140195396 | -1.149447249 |
| PXR1      | YGR280C   | -1.211252469 | -6.51343568  | -5.014458782 | -1.298930944 |
| YOR1      | YGR281W   | 1.176199042  | 2.118641475  | 1.970913112  | 1.074954276  |
| BGL2      | YGR282C   | 1.00069767   | -1.103446929 | 1.031583926  | 1.069662779  |
| YGR283C   | YGR283C   | -1.122713862 | -11.66828373 | -11.76070159 | 1.007920432  |
| ERV29     | YGR284C   | 1.342829411  | 2.563807921  | 1.682465948  | 1.523839412  |
| ZUO1      | YGR285C   | -1.280225797 | -3.407585646 | -2.459364137 | -1.385555557 |
| BIO2      | YGR286C   | -1.092131552 | -2.313151685 | -3.21437003  | 1.389606246  |
| YGR287C   | YGR287C   | 1.001557138  | 2.710092993  | 3.018451268  | -1.113781437 |
| MAL13     | YGR288W   | 1.147921494  | 2.6941523    | 2.236425682  | 1.204668826  |

|               |                |              |              |              |              |
|---------------|----------------|--------------|--------------|--------------|--------------|
| MAL11         | YGR289C        | 1.099907716  | 3.098941897  | 3.615249369  | -1.166607665 |
| MAL12         | YGR292W        | -1.235904365 | 2.901037891  | 2.760954385  | 1.050737349  |
| YGR294W       | YGR294W        | 1.008717593  | -1.093779296 | 1.037796186  | -1.135119983 |
| COS6          | YGR295C        | 1.197303198  | -1.421663965 | 1.145038116  | 1.241586586  |
| YRF1-3        | YGR296W        | -1.052650901 | -1.059080858 | 1.146604481  | -1.214346857 |
| <b>RPL14B</b> | <b>YHL001W</b> | 1.116505333  | -8.636831412 | -4.15380262  | -2.079258983 |
| HSE1          | YHL002W        | -1.129011061 | -1.168397351 | 1.145993506  | 1.019549715  |
| LAG1          | YHL003C        | 1.209641733  | -1.028020179 | -1.470142159 | 1.430071305  |
| MRP4          | YHL004W        | 1.076022779  | -1.211211596 | -1.111980541 | -1.089238122 |
| SHU1          | YHL006C        | -1.258632681 | -1.007045502 | 1.328954859  | -1.319657212 |
| STE20         | YHL007C        | -1.121575857 | -1.276817732 | 1.071837114  | -1.368540632 |
| YHL008C       | YHL008C        | 1.09778707   | 2.535285136  | 3.818685583  | -1.506215426 |
| YAP3          | YHL009C        | -1.161173906 | -1.013723511 | -1.010743875 | -1.002947963 |
| YHL010C       | YHL010C        | -1.149883478 | -1.640706754 | 2.340895668  | -1.426760549 |
| PRS3          | YHL011C        | 1.128979815  | -7.015687314 | -9.707503572 | 1.383685324  |
| YHL013C       | YHL013C        | -1.120284401 | -2.738441295 | -2.924421955 | 1.067914788  |
| YLF2          | YHL014C        | -1.104838013 | -1.106068278 | -1.556644536 | 1.407367491  |
| RPS20         | YHL015W        | -1.033271227 | -3.441048364 | -2.744301069 | -1.253888796 |
| DUR3          | YHL016C        | 1.251951708  | -1.592932444 | 1.15273738   | 1.381869341  |
| YHL017W       | YHL017W        | 1.058862141  | -1.101382346 | 1.00217434   | 1.098992763  |
| APM2          | YHL019C        | -1.070596293 | -1.854372871 | 2.297071829  | -1.238732439 |
| OPI1          | YHL020C        | -1.122266422 | -1.419279552 | -1.289643393 | -1.100520933 |
| YHL021C       | YHL021C        | 1.214377271  | 21.76047285  | 24.94267043  | -1.14623752  |
| RMD11         | YHL023C        | -1.112620999 | -1.022596757 | -1.009768394 | -1.012704262 |
| RIM4          | YHL024W        | -1.080254386 | 12.54121425  | 13.33005688  | -1.06290002  |
| SNF6          | YHL025W        | -1.071170271 | -1.203090502 | -1.024119937 | -1.174755474 |
| YHL026C       | YHL026C        | 1.1308047    | -1.986328043 | -2.115495294 | 1.065028157  |
| RIM101        | YHL027W        | 1.005219976  | -1.320551031 | 1.73197902   | -1.311557812 |
| WSC4          | YHL028W        | 1.128743357  | -1.25320203  | -1.160821322 | 1.454743638  |
| YHL029C       | YHL029C        | 1.108408654  | -1.131698918 | -1.52850431  | 1.350628057  |
| ECM29         | YHL030W        | 1.047255119  | -1.78937604  | 1.614886688  | 1.108050523  |
| GOS1          | YHL031C        | -1.220598794 | -1.542759471 | 2.569414946  | -1.665466973 |
| GUT1          | YHL032C        | 1.185226498  | -1.638799448 | 1.371590427  | 1.194816919  |
| <b>RPL8A</b>  | <b>YHL033C</b> | -1.148909061 | -7.205911723 | -5.389794621 | -1.336954789 |
| SBP1          | YHL034C        | -1.203720082 | -1.067297292 | 1.278500491  | -1.364540112 |
| YHL035C       | YHL035C        | 1.141563745  | 2.115024591  | 1.599102045  | 1.32263266   |
| MUP3          | YHL036W        | 1.192944494  | -1.691439282 | 1.282972132  | 1.3183757    |
| CBP2          | YHL038C        | -1.417380568 | -1.177159005 | -1.042120913 | -1.129580061 |
| YHL039W       | YHL039W        | 1.351536375  | -4.695477446 | -6.991756144 | 1.489040513  |
| ARN1          | YHL040C        | 1.01761168   | -2.120722964 | -2.33616133  | 1.101587228  |
| YHL044W       | YHL044W        | -1.220308918 | -1.559099061 | 2.086933666  | -1.338551038 |
| YHL045W       | YHL045W        | -1.000971487 | -1.273022854 | 1.820305927  | -1.429908286 |
| YHL046C       | YHL046C        | 1.034066331  | -1.012600433 | 1.160592579  | -1.175216548 |
| ARN2          | YHL047C        | 1.001623697  | -1.943765647 | -2.746627943 | 1.413044803  |
| COS8          | YHL048W        | 2.08830207   | 4.440778925  | 1.789413081  | 2.481695798  |
| YHL049C       | YHL049C        | 1.018402499  | -1.217884365 | -1.299860221 | 1.06731005   |
| YHL050C       | YHL050C        | 1.166702941  | -1.325456884 | 1.071175655  | 1.237385183  |
| OSH7          | YHR001W        | -1.065395798 | -1.475028817 | 1.260221126  | 1.170452381  |
| QCR10         | YHR001W-A      | 1.160253178  | 2.889320731  | 3.376970258  | -1.16877653  |

|         |           |              |              |               |              |
|---------|-----------|--------------|--------------|---------------|--------------|
| LEU5    | YHR002W   | -1.199548923 | -1.403935716 | 1.662217683   | -1.183969938 |
| YHR003C | YHR003C   | -1.173087065 | -1.321787706 | -1.372140329  | 1.038094335  |
| NEM1    | YHR004C   | -1.149854871 | -1.334951048 | 1.503325083   | -1.126127497 |
| GPA1    | YHR005C   | -1.226842472 | -1.512176996 | -1.632191966  | 1.07936569   |
| MRS11   | YHR005C-A | 1.020235683  | -3.460119635 | -2.39809376   | -1.442862532 |
| STP2    | YHR006W   | -1.14784175  | -1.758481445 | 1.948891781   | -1.108281117 |
| ERG11   | YHR007C   | 1.174531891  | -3.229769842 | -3.183906651  | -1.014404691 |
| SOD2    | YHR008C   | 1.014103881  | 2.681566855  | 2.92281713    | -1.089966161 |
| YHR009C | YHR009C   | 1.212020536  | -1.021415575 | 1.099301785   | -1.076253204 |
| RPL27A  | YHR010W   | 1.001643238  | -10.44976589 | -11.61610062  | 1.11161348   |
| DIA4    | YHR011W   | -1.386846555 | -1.239578163 | 1.196787964   | 1.035754203  |
| VPS29   | YHR012W   | -1.330173655 | -1.172068581 | 1.339685807   | -1.143009742 |
| ARD1    | YHR013C   | -1.194462362 | -2.512881393 | -2.261779437  | -1.111019648 |
| MIP6    | YHR015W   | 1.056860745  | -1.334461997 | -1.345537989  | 1.795569313  |
| YSC84   | YHR016C   | -1.041502805 | 4.516589205  | 4.38298793    | 1.03048178   |
| YSC83   | YHR017W   | -1.001525156 | 2.263598625  | 1.961329588   | 1.15411435   |
| ARG4    | YHR018C   | 1.018281964  | -1.482523357 | 1.28897348    | 1.150158153  |
| DED81   | YHR019C   | -1.083442947 | -3.19125694  | -2.958208039  | -1.07878043  |
| YHR020W | YHR020W   | 1.050039543  | -13.05450569 | -9.48581974   | -1.37621271  |
| RPS27B  | YHR021C   | 1.553544488  | -9.389447908 | -10.39069506  | 1.10663536   |
| ECM12   | YHR021W-A | 1.504820234  | -1.020558281 | -1.752110005  | 1.716815235  |
| YHR022C | YHR022C   | 1.197555076  | 3.683547769  | 2.385013501   | 1.544455731  |
| MYO1    | YHR023W   | -1.123645196 | -1.346346191 | -1.142496945  | -1.178424325 |
| MAS2    | YHR024C   | 1.014699678  | -1.148848705 | -1.082598783  | -1.061195268 |
| THR1    | YHR025W   | 1.200002955  | -1.765288163 | -2.177769317  | 1.233662221  |
| PPA1    | YHR026W   | 1.191874002  | -2.039349212 | -2.32736842   | 1.141230941  |
| RPN1    | YHR027C   | 1.011532016  | -1.021194667 | 1.123833287   | -1.100508379 |
| DAP2    | YHR028C   | 1.022775517  | 2.27146335   | 1.937915409   | 1.172116873  |
| YHR029C | YHR029C   | -1.287228364 | -1.105992454 | 1.132598334   | -1.252645211 |
| SLT2    | YHR030C   | -1.093074262 | 2.568170506  | 2.532837459   | 1.013949986  |
| RRM3    | YHR031C   | -1.004214736 | -1.248403571 | -1.381455583  | 1.106577725  |
| YHR032W | YHR032W   | 1.250748506  | -1.217329665 | -1.283377685  | 1.054256478  |
| YHR033W | YHR033W   | 1.18356911   | 2.757117811  | 2.413053678   | 1.142584533  |
| YHR034C | YHR034C   | -1.275210797 | -1.263793271 | 2.148881277   | -1.700342394 |
| YHR035W | YHR035W   | 1.148607416  | -1.061754513 | -1.357630709  | 1.278667237  |
| YHR036W | YHR036W   | -1.055577571 | -1.436428087 | -1.721280009  | 1.198305731  |
| PUT2    | YHR037W   | 1.005441527  | -1.297196705 | 1.066478842   | 1.216336091  |
| FIL1    | YHR038W   | -1.138597727 | -1.263095754 | 1.181684647   | 1.068894106  |
| MSC7    | YHR039C   | 1.239879137  | -1.879841365 | -2.746591669  | 1.461076301  |
| VMA10   | YHR039C-A | 1.072482599  | -1.726615706 | -1.558907394  | -1.107580677 |
| YHR040W | YHR040W   | -1.110876624 | -7.763055948 | -7.992380354  | 1.029540481  |
| SRB2    | YHR041C   | 1.179466011  | -1.717448949 | -1.46381547   | -1.173268751 |
| NCP1    | YHR042W   | 1.155480711  | -3.155729067 | -3.680486228  | 1.16628714   |
| DOG2    | YHR043C   | -1.133204784 | 2.348430792  | 2.452273266   | -1.044217813 |
| DOG1    | YHR044C   | -1.011680344 | -1.176293905 | -1.024265358  | 1.204837097  |
| YHR045W | YHR045W   | 1.084444505  | -1.774850717 | -2.149831956  | 1.211274805  |
| INM1    | YHR046C   | -1.227188943 | -2.86843027  | -2.933664537  | 1.022742148  |
| AAP1'   | YHR047C   | 1.041487484  | -1.251329152 | -1.322411953  | 1.056805838  |
| YHR048W | YHR048W   | 1.093557949  | -2.406925432 | -2.4111516326 | 1.001907368  |



|           |           |              |              |              |              |
|-----------|-----------|--------------|--------------|--------------|--------------|
| YHR049C-A | YHR049C-A | -1.369556799 | -1.179673495 | 1.896981187  | -1.608056123 |
| FSH1      | YHR049W   | 1.012462297  | 2.245784093  | 2.674255518  | -1.190789233 |
| SMF2      | YHR050W   | 1.087583768  | -1.285495707 | 1.296317083  | -1.008418056 |
| COX6      | YHR051W   | 1.309207442  | -1.852359525 | 1.41690367   | 1.307329189  |
| CIC1      | YHR052W   | 1.020109133  | -13.41997633 | -27.80066772 | 2.071588432  |
| CUP1-1    | YHR053C   | 1.050311814  | -1.042250017 | 1.203272283  | -1.254110557 |
| YHR054C   | YHR054C   | 1.168401354  | -1.105508258 | -1.046641733 | 1.157071078  |
| CUP1-2    | YHR055C   | 1.066028999  | -1.041774572 | 1.216932359  | -1.267769188 |
| RSC30     | YHR056C   | 1.164791701  | -1.143702477 | -1.064413383 | 1.217372224  |
| CPR2      | YHR057C   | -1.084693858 | -1.046238437 | 1.422921547  | -1.360035626 |
| MED6      | YHR058C   | -1.104782629 | -1.379573941 | -1.315922916 | -1.048369873 |
| FYV4      | YHR059W   | -1.198390928 | -1.604878479 | -1.533776583 | -1.046357401 |
| VMA22     | YHR060W   | -1.151500568 | -1.43539373  | -1.18138206  | -1.215012297 |
| GIC1      | YHR061C   | 1.123358777  | -1.279897002 | -1.420426797 | 1.109797737  |
| RPP1      | YHR062C   | -1.152713262 | -5.624881515 | -5.407337949 | -1.040231176 |
| PAN5      | YHR063C   | -1.121380625 | -1.566508344 | -1.943729761 | 1.240803963  |
| SSZ1      | YHR064C   | 1.022566893  | -2.294617401 | -2.346534409 | 1.022625562  |
| RRP3      | YHR065C   | -1.043186063 | -5.903506053 | -7.007807451 | 1.18705857   |
| SSF1      | YHR066W   | -1.237638745 | -27.23422201 | -30.95938045 | 1.136782261  |
| RMD12     | YHR067W   | -1.083305546 | -1.30874582  | 1.017175657  | 1.286646816  |
| DYS1      | YHR068W   | 1.090675279  | -2.754505745 | -3.200062373 | 1.161755563  |
| RRP4      | YHR069C   | -1.350675102 | -2.905965006 | -2.530822704 | -1.148229389 |
| TRM5      | YHR070W   | 1.063205226  | -5.230161308 | -4.906601015 | -1.065943877 |
| PCL5      | YHR071W   | 1.210858212  | -1.497434172 | 1.54182936   | -1.029647506 |
| ERG7      | YHR072W   | -1.008703098 | -3.553736221 | -2.787554203 | -1.274858159 |
| NOP10     | YHR072W-A | 1.036688496  | -8.151070294 | -4.858741969 | -1.677609214 |
| OSH3      | YHR073W   | 1.003881851  | -1.013811797 | 1.028558706  | -1.04276495  |
| QNS1      | YHR074W   | 1.227673813  | -1.173586063 | -1.227943734 | 1.441097653  |
| PPE1      | YHR075C   | 1.016305738  | -1.677738442 | 1.483539898  | 1.130902137  |
| PTC7      | YHR076W   | -1.250160095 | -1.145763691 | 1.020653287  | 1.12257875   |
| NMD2      | YHR077C   | -1.133645245 | -1.894412823 | -1.447186214 | -1.309031833 |
| YHR078W   | YHR078W   | 1.253592277  | -1.372332812 | -1.574183951 | 1.147086142  |
| IRE1      | YHR079C   | 1.158785491  | -1.01601865  | -1.222018319 | 1.202751858  |
| YHR080C   | YHR080C   | -1.010891406 | -1.977829289 | 1.718737211  | 1.150745603  |
| YHR081W   | YHR081W   | -1.049745515 | -3.364087733 | -3.526536833 | 1.048289198  |
| KSP1      | YHR082C   | -1.047318585 | 2.63575607   | 2.744207256  | -1.041146139 |
| YHR083W   | YHR083W   | -1.158088443 | -1.212455818 | 1.024758037  | -1.242473844 |
| STE12     | YHR084W   | 1.008389722  | -2.229454586 | -3.178305839 | 1.425597929  |
| YHR085W   | YHR085W   | -1.053065293 | -8.215624201 | -9.085959587 | 1.105936611  |
| NAM8      | YHR086W   | 1.206722904  | -1.923754497 | 1.440800705  | 1.335198193  |
| YHR087W   | YHR087W   | -1.044765079 | 45.79468317  | 60.91296442  | -1.330131801 |
| RPF1      | YHR088W   | -1.190980303 | -21.17079036 | -14.05838762 | -1.50591881  |
| GAR1      | YHR089C   | -1.026213189 | -15.46085859 | -11.06195449 | -1.397660658 |
| YNG2      | YHR090C   | -1.138481797 | -1.073003178 | 1.009113929  | 1.063312225  |
| MSR1      | YHR091C   | -1.232134866 | -1.261605198 | 1.447335484  | -1.147217439 |
| HXT4      | YHR092C   | 1.420872256  | -1.505217252 | -2.175656486 | 1.445410278  |
| AHT1      | YHR093W   | 1.302703666  | -1.353988728 | -1.280894431 | 1.734316619  |
| HXT1      | YHR094C   | 1.11813087   | -11.11753516 | -14.04160049 | 1.263013814  |
| HXT5      | YHR096C   | -1.022558592 | 61.43031132  | 75.37038636  | -1.226925026 |

|           |           |              |              |              |              |
|-----------|-----------|--------------|--------------|--------------|--------------|
| YHR097C   | YHR097C   | -1.040074773 | 4.735262948  | 4.933648141  | -1.041895286 |
| SFB3      | YHR098C   | 1.179135687  | -1.056983931 | -1.436984804 | 1.359514332  |
| TRA1      | YHR099W   | 1.166181181  | -1.668251924 | -1.909905255 | 1.14485422   |
| YHR100C   | YHR100C   | 1.202661401  | -4.222382061 | -2.883020767 | -1.464568729 |
| BIG1      | YHR101C   | -1.026515401 | -1.383714511 | 1.2616814    | 1.096722604  |
| KIC1      | YHR102W   | 1.043718134  | -1.678444459 | 1.73877272   | -1.035942879 |
| SBE22     | YHR103W   | -1.065559871 | -1.102260227 | 1.125941166  | -1.021483982 |
| GRE3      | YHR104W   | -1.109896242 | 16.73982264  | 21.32045446  | -1.27363682  |
| YHR105W   | YHR105W   | 1.068911121  | -1.534304842 | 1.588412428  | -1.035265212 |
| TRR2      | YHR106W   | -1.204387251 | -1.970985504 | 2.242061806  | -1.137533382 |
| CDC12     | YHR107C   | -1.050802621 | -1.053540271 | 1.284198264  | -1.218936095 |
| GGA2      | YHR108W   | 1.098897643  | -1.023107747 | -1.179283074 | 1.206533648  |
| CTM1      | YHR109W   | 1.128936454  | -1.404313733 | 1.076402492  | 1.304636271  |
| ERP5      | YHR110W   | -1.249602586 | -1.127846425 | 1.435609907  | -1.272877118 |
| UBA4      | YHR111W   | -1.182342635 | -1.132912462 | 1.189223638  | -1.347286281 |
| YHR112C   | YHR112C   | -1.065711526 | 2.280723092  | 2.076888583  | 1.098144171  |
| YHR113W   | YHR113W   | 1.091639581  | 2.203097316  | 1.846306191  | 1.193245913  |
| BZZ1      | YHR114W   | -1.06105552  | -1.265755905 | 1.531142439  | -1.209666439 |
| YHR115C   | YHR115C   | 1.111783198  | -1.489350707 | 1.616466123  | -1.085349552 |
| YHR116W   | YHR116W   | -1.485694001 | -1.233936463 | 2.332409067  | -1.890218123 |
| TOM71     | YHR117W   | -1.023325372 | -1.104311754 | -1.438619143 | 1.302729178  |
| ORC6      | YHR118C   | -1.245891158 | -1.291370421 | -1.144434673 | -1.128391557 |
| SET1      | YHR119W   | 1.008984239  | -1.49290936  | -1.562208461 | 1.046418827  |
| MSH1      | YHR120W   | -1.089222827 | -1.805506459 | -2.10871453  | 1.16793519   |
| YHR121W   | YHR121W   | -1.205564298 | -1.634299208 | -1.113253538 | -1.468038638 |
| YHR122W   | YHR122W   | -1.27084745  | -1.827218994 | -1.125578968 | -1.623359219 |
| EPT1      | YHR123W   | 1.192576474  | -1.422042189 | 1.328236986  | 1.070623846  |
| NDT80     | YHR124W   | 1.030202457  | -1.48669751  | 1.373752741  | 1.082216229  |
| YHR127W   | YHR127W   | -1.180823361 | -2.017653032 | -2.168183247 | 1.074606591  |
| FUR1      | YHR128W   | 1.113120812  | -5.026337595 | -5.364327909 | 1.067243854  |
| ARP1      | YHR129C   | -1.059203549 | -1.496969121 | -1.678693473 | 1.121394856  |
| YHR130C   | YHR130C   | 1.028258814  | -1.320322725 | -1.163983526 | -1.134313928 |
| YHR131C   | YHR131C   | 1.18024364   | -1.433645274 | 1.203212423  | 1.191514688  |
| ECM14     | YHR132C   | 1.055008476  | -1.21024561  | 1.041968005  | 1.161499782  |
| YHR132W-A | YHR132W-A | -1.23920987  | -1.046554832 | 1.236324011  | -1.293880867 |
| YHR133C   | YHR133C   | 1.278941609  | -1.627848273 | -2.737660987 | 1.681766681  |
| WSS1      | YHR134W   | -1.039379771 | -1.008366228 | -1.05584958  | 1.047089391  |
| YCK1      | YHR135C   | 1.0061382    | -1.111207068 | -1.365000987 | 1.228394803  |
| SPL2      | YHR136C   | -1.107972737 | -2.572218004 | -1.84296801  | -1.395693246 |
| ARO9      | YHR137W   | 1.295459649  | 20.10189412  | 19.12885822  | 1.050867432  |
| YHR138C   | YHR138C   | 1.181763885  | 2.472575021  | 3.018999274  | -1.220994003 |
| SPS100    | YHR139C   | 1.227989067  | 3.361394208  | 2.641130471  | 1.272710396  |
| YHR140W   | YHR140W   | -1.091692798 | 4.818945904  | 3.698089139  | 1.303090793  |
| RPL42B    | YHR141C   | -1.134702399 | -11.92689407 | -8.087939875 | -1.474651673 |
| CHS7      | YHR142W   | 1.09344822   | -1.078175104 | -1.191878478 | 1.105459099  |
| DSE2      | YHR143W   | 1.03525864   | -1.536047193 | -2.010256766 | 1.308720705  |
| RPC10     | YHR143W-A | -1.184875492 | -5.829493964 | -3.76258036  | -1.549334075 |
| DCD1      | YHR144C   | -1.13757926  | -3.339414618 | -3.377340133 | 1.011356936  |
| CRP1      | YHR146W   | 1.127424495  | -1.057667258 | -1.108664271 | 1.172597899  |

|         |         |              |              |              |              |
|---------|---------|--------------|--------------|--------------|--------------|
| MRPL6   | YHR147C | -1.022127444 | -1.036827251 | -1.094987425 | 1.056094372  |
| IMP3    | YHR148W | -1.281742298 | -10.50716877 | -10.22510089 | -1.027585828 |
| YHR149C | YHR149C | -1.023222939 | -4.757104676 | -5.24717905  | 1.103019464  |
| YHR150W | YHR150W | -1.110063342 | -1.031051417 | -1.173821288 | 1.210270102  |
| YHR151C | YHR151C | 1.129014743  | -1.086841458 | -1.30074129  | 1.196808679  |
| SPO12   | YHR152W | -1.012576149 | -1.252504177 | 1.119857791  | 1.118449313  |
| SPO16   | YHR153C | -1.049732333 | -1.775861253 | -1.455705866 | -1.219931371 |
| RTT107  | YHR154W | -1.160423534 | -4.348484777 | -3.836297019 | -1.133510976 |
| YHR155W | YHR155W | 1.04022384   | -1.177073306 | -1.10389358  | 1.299363667  |
| LIN1    | YHR156C | 1.047013372  | -1.805240769 | 1.8582752    | -1.029378037 |
| REC104  | YHR157W | 1.207068869  | -1.71356928  | 1.79192025   | -1.045723841 |
| KEL1    | YHR158C | 1.182446463  | -1.267941187 | 1.113040877  | 1.139168573  |
| YHR159W | YHR159W | -1.025198571 | 2.485057418  | 2.465955616  | 1.007746207  |
| PEX18   | YHR160C | 1.035624696  | 9.058468294  | 8.087615138  | 1.120041958  |
| YAP1801 | YHR161C | 1.051818841  | 2.974014728  | 2.353099012  | 1.263871478  |
| YHR162W | YHR162W | 1.020769415  | -1.032197198 | 1.24963868   | -1.210658857 |
| SOL3    | YHR163W | 1.143463464  | -1.175266655 | 1.334808221  | -1.135749249 |
| DNA2    | YHR164C | -1.05422073  | -1.182721181 | 1.173486707  | 1.007869262  |
| PRP8    | YHR165C | 1.011776994  | -1.272838591 | -1.252426963 | -1.016297659 |
| CDC23   | YHR166C | -1.185307533 | -1.218370988 | -1.281950979 | 1.052184427  |
| THP2    | YHR167W | -1.122840457 | -1.662725159 | -1.776143965 | 1.0682126    |
| YHR168W | YHR168W | -1.028607443 | -1.21993892  | 1.310133755  | -1.073933894 |
| DBP8    | YHR169W | -1.204242996 | -7.109884843 | -6.407681913 | -1.109587669 |
| NMD3    | YHR170W | -1.08654702  | -18.89060247 | -23.95424449 | 1.268050849  |
| APG7    | YHR171W | 1.09040452   | 3.160757134  | 2.88460262   | 1.095733988  |
| SPC97   | YHR172W | 1.047523715  | -1.64882514  | -1.820295067 | 1.103995216  |
| CTR2    | YHR175W | 1.16783954   | -2.022860416 | -2.190570419 | 1.082907353  |
| YHR176W | YHR176W | 1.003389323  | -1.088007676 | 1.022786555  | -1.112799623 |
| STB5    | YHR178W | -1.131735194 | -1.162288863 | 1.322721484  | -1.138031625 |
| OYE2    | YHR179W | -1.165755151 | -1.168501803 | 1.211931917  | -1.416144631 |
| YHR180W | YHR180W | 1.041325293  | -1.118143125 | 1.280730941  | -1.145408769 |
| YHR181W | YHR181W | -1.086591776 | -1.15916194  | 1.123664814  | -1.302509486 |
| YHR182W | YHR182W | 1.126480786  | -1.143108484 | -1.201358281 | 1.373282845  |
| GND1    | YHR183W | -1.05353829  | -1.379889802 | -1.001845454 | -1.37734797  |
| KOG1    | YHR186C | -1.025071931 | -1.399313614 | -1.19697511  | -1.16904153  |
| IKI1    | YHR187W | -1.091269811 | -2.245180098 | -2.27429732  | 1.012968769  |
| GPI16   | YHR188C | 1.139003285  | -1.195339388 | -1.254040485 | 1.04910831   |
| YHR189W | YHR189W | 1.118909195  | -1.347768367 | 1.687829342  | -1.252314109 |
| ERG9    | YHR190W | 1.1314474    | -1.270584924 | 1.212802574  | 1.047643657  |
| CTF8    | YHR191C | -1.090681475 | -1.37304871  | -1.190207487 | -1.153621301 |
| YHR192W | YHR192W | -1.173013088 | -1.049201191 | 1.213924407  | -1.273650934 |
| EGD2    | YHR193C | -1.143345315 | -2.241360863 | -1.811536583 | -1.23727055  |
| YHR194W | YHR194W | 1.080879179  | -1.525334738 | 1.538819924  | -1.008840805 |
| NVJ1    | YHR195W | -1.111847092 | 2.709683338  | 2.925725733  | -1.079729757 |
| UTP9    | YHR196W | -1.113561638 | -14.87516393 | -25.35906921 | 1.704792589  |
| YHR197W | YHR197W | 1.112520219  | -28.43383946 | -35.23561266 | 1.239214026  |
| YHR198C | YHR198C | 1.256343966  | 3.10291908   | 2.500851273  | 1.240745147  |
| YHR199C | YHR199C | 1.035920179  | 2.234488054  | 2.389059387  | -1.069175278 |
| RPN10   | YHR200W | -1.106991231 | -1.049626693 | 1.253320271  | -1.194062879 |

|           |           |              |              |              |              |
|-----------|-----------|--------------|--------------|--------------|--------------|
| PPX1      | YHR201C   | -1.160468271 | -1.361060481 | -1.383109257 | 1.016199703  |
| YHR202W   | YHR202W   | -1.098077826 | -1.554218163 | 2.02910291   | -1.305545745 |
| RPS4B     | YHR203C   | -1.057500106 | -6.968697924 | -6.009183823 | -1.159674613 |
| MNL1      | YHR204W   | 1.395141177  | -2.604942044 | -3.710485283 | 1.42440224   |
| SCH9      | YHR205W   | 1.265305235  | -1.111755403 | -1.582707212 | 1.423610992  |
| SKN7      | YHR206W   | 1.19411898   | -1.657119122 | -1.75887273  | 1.061403918  |
| SET5      | YHR207C   | -1.276641037 | -1.004826573 | 1.347099664  | -1.34062902  |
| BAT1      | YHR208W   | 1.168368935  | -5.473834685 | -5.534871902 | 1.011150724  |
| YHR209W   | YHR209W   | 1.16291336   | 5.873781624  | 5.498836489  | 1.068186267  |
| YHR210C   | YHR210C   | 1.091053018  | -1.947642287 | 1.139346213  | 1.709438505  |
| FLO5      | YHR211W   | 1.185534839  | -1.542765084 | 1.196298944  | 1.289615017  |
| YHR212C   | YHR212C   | 1.111369198  | -1.809491963 | 1.538508936  | 1.176133541  |
| YHR213W   | YHR213W   | 1.167386879  | -1.171729815 | -1.148068545 | 1.345226144  |
| YHR214W   | YHR214W   | 1.181979991  | -1.347238463 | -2.069246974 | 1.535917383  |
| YHR214W-A | YHR214W-A | 1.081535577  | -1.016550804 | 1.156581979  | -1.17572434  |
| PHO12     | YHR215W   | -1.009801831 | -15.16775518 | -13.18838875 | -1.150084022 |
| IMD2      | YHR216W   | 1.472874545  | -3.106634801 | -3.541399372 | 1.139947113  |
| YHR218W   | YHR218W   | 1.398906354  | -1.207955258 | -1.1353727   | -1.063928399 |
| YHR219W   | YHR219W   | -1.083225559 | -1.060454189 | 1.243875329  | -1.319072803 |
| YILO01W   | YILO01W   | -1.172192381 | -1.001021157 | 1.047096696  | -1.048165946 |
| INP51     | YILO02C   | 1.112708063  | -1.347537843 | 1.013963     | 1.328981278  |
| DRE3      | YILO03W   | -1.096008199 | -2.271642289 | -1.987424907 | -1.14300786  |
| BET1      | YILO04C   | -1.121816999 | -2.193025301 | -1.99216243  | -1.100826553 |
| EPS1      | YILO05W   | 1.010968864  | -1.022926949 | -1.238108721 | 1.210358884  |
| YILO06W   | YILO06W   | 1.245793406  | -1.871796108 | 1.626813818  | 1.150590244  |
| YILO07C   | YILO07C   | -1.216559852 | -1.681433946 | 2.783863234  | -1.655648286 |
| URM1      | YILO08W   | -1.192286585 | -4.177488356 | -2.869315946 | -1.455917868 |
| EST3      | YILO09C-A | 1.07530508   | -1.085162399 | 1.574062558  | -1.450531791 |
| FAA3      | YILO09W   | 1.14228658   | -1.645202981 | -2.387237295 | 1.451029036  |
| DOT5      | YILO10W   | -1.133901662 | -1.206368097 | 1.001185254  | 1.204939936  |
| TIR3      | YILO11W   | 1.196265063  | -2.084114574 | -2.351374062 | 1.128236466  |
| PDR11     | YILO13C   | -1.002241312 | 2.027253716  | 2.536921825  | -1.251408151 |
| YILO14C-A | YILO14C-A | -1.004087902 | -1.160778148 | 1.831192119  | -1.577555645 |
| MNT3      | YILO14W   | 1.108031677  | -1.505035635 | -1.768525293 | 1.175072039  |
| BAR1      | YILO15W   | 1.143921004  | -1.119178828 | -1.388710968 | 1.240830271  |
| SNL1      | YILO16W   | -1.1386664   | -2.79381251  | -1.937361665 | -1.442070709 |
| VID28     | YILO17C   | -1.085253139 | 2.170619966  | 2.44062686   | -1.124391602 |
| RPL2B     | YILO18W   | -1.204878131 | -9.927100662 | -7.007623784 | -1.416614386 |
| YILO19W   | YILO19W   | -1.208918704 | -15.35203863 | -14.12103629 | -1.087175071 |
| HIS6      | YILO20C   | -1.083079722 | -2.418171393 | -2.029901757 | -1.191275087 |
| RPB3      | YILO21W   | -1.129353412 | -1.666862835 | -1.978806797 | 1.18714435   |
| TIM44     | YILO22W   | -1.038280448 | -1.028043089 | 1.114841866  | -1.084431068 |
| YILO23C   | YILO23C   | 1.169796529  | 2.281095475  | 2.300717698  | -1.008602105 |
| YILO24C   | YILO24C   | -1.012550923 | -1.11663947  | 1.279677144  | -1.146007444 |
| IRR1      | YILO26C   | -1.072910879 | -1.38815769  | -1.351265951 | -1.027301613 |
| KRE27     | YILO27C   | -1.041268879 | -2.008124288 | -1.683387756 | -1.192906555 |
| YILO28W   | YILO28W   | 1.160966889  | -1.628127753 | 1.32401496   | 1.229689848  |
| SSM4      | YILO30C   | 1.267521463  | -1.561275159 | -1.692454562 | 1.084020682  |
| ULP2      | YILO31W   | -1.041589611 | -1.028027185 | -1.034608351 | 1.06360551   |

|           |           |              |              |              |              |
|-----------|-----------|--------------|--------------|--------------|--------------|
| BCY1      | YIL033C   | 1.227442314  | 2.709804306  | 2.192635045  | 1.235866549  |
| CAP2      | YIL034C   | 1.241597492  | 2.423933341  | 1.752557399  | 1.383083568  |
| CKA1      | YIL035C   | -1.083820535 | -1.073388308 | -1.377681173 | 1.28348815   |
| CST6      | YIL036W   | -1.111250493 | 2.260267798  | 2.387269414  | -1.056188747 |
| PRM2      | YIL037C   | 1.190258366  | -1.209941642 | -1.823688609 | 1.507253363  |
| NOT3      | YIL038C   | -1.076250684 | -1.759416994 | -1.413527725 | -1.244699318 |
| YIL039W   | YIL039W   | 1.105295373  | -1.742734405 | -1.99128592  | 1.142621569  |
| YIL040W   | YIL040W   | 1.048776452  | -2.353203183 | -1.354253222 | -1.737638978 |
| YIL041W   | YIL041W   | -1.066551217 | -1.103864742 | 1.053603415  | 1.047704218  |
| YIL042C   | YIL042C   | 1.061909103  | -1.391613082 | 1.802888893  | -1.295538909 |
| CBR1      | YIL043C   | 1.136680969  | -2.058411691 | -2.189723202 | 1.063792637  |
| AGE2      | YIL044C   | -1.195522703 | -1.482676325 | -1.229097881 | -1.206312653 |
| PIG2      | YIL045W   | 1.004283325  | 3.939109421  | 4.20401431   | -1.067249944 |
| MET30     | YIL046W   | -1.061032371 | -1.539459085 | -1.29312339  | -1.190496666 |
| SYG1      | YIL047C   | 1.388912061  | -1.766681683 | -2.547743939 | 1.442106954  |
| NEO1      | YIL048W   | 1.233715582  | -1.158849881 | -1.066471417 | 1.235880275  |
| DFG10     | YIL049W   | 1.19523184   | -1.443144836 | -1.287764546 | -1.120658928 |
| PCL7      | YIL050W   | 1.044510632  | -1.720900988 | 1.598835755  | 1.076346324  |
| MMF1      | YIL051C   | 1.003124347  | -1.243116919 | 1.453896957  | -1.169557695 |
| RPL34B    | YIL052C   | 1.045625394  | -7.791890779 | -5.244263701 | -1.485793092 |
| RHR2      | YIL053W   | -1.077914764 | -2.713361032 | -2.011311713 | -1.349050479 |
| YIL055C   | YIL055C   | 1.179481492  | 3.505594704  | 4.113904116  | -1.173525311 |
| YIL056W   | YIL056W   | 1.287941867  | -1.755301125 | 1.073656914  | 1.634880847  |
| YIL059C   | YIL059C   | 1.010837613  | -1.857477478 | -1.667924231 | -1.113646199 |
| SNP1      | YIL061C   | -1.056662385 | -1.213709972 | -1.207312303 | -1.005299101 |
| ARC15     | YIL062C   | -1.212307972 | -1.258995846 | 1.957633858  | -1.554916853 |
| YRB2      | YIL063C   | -1.31740322  | -1.165705243 | 1.618957841  | -1.388822646 |
| YIL064W   | YIL064W   | -1.213323358 | -11.35526806 | -8.354212652 | -1.3592266   |
| FIS1      | YIL065C   | -1.123700332 | -1.371676985 | 2.162775168  | -1.576737957 |
| RNR3      | YIL066C   | 1.476821819  | -1.461106691 | 1.07374162   | 1.360761902  |
| YIL067C   | YIL067C   | 1.005469184  | -1.010560504 | 1.183746895  | -1.196247858 |
| SEC6      | YIL068C   | -1.156977845 | -1.317600631 | 1.334455959  | -1.012792441 |
| RPS24B    | YIL069C   | -1.117009778 | -14.04302323 | -9.632641181 | -1.457858023 |
| MAM33     | YIL070C   | -1.229361217 | -1.163518506 | -1.040974214 | -1.117720776 |
| PCI8      | YIL071C   | -1.335583173 | -1.587548948 | 1.567918809  | 1.01251987   |
| HOP1      | YIL072W   | 1.509919194  | 2.327564104  | 1.369945987  | 1.699018886  |
| SER33     | YIL074C   | 1.216775915  | -1.537360178 | -2.272626401 | 1.478265428  |
| RPN2      | YIL075C   | -1.061330698 | -1.255143843 | 1.708531215  | -1.361223436 |
| SEC28     | YIL076W   | -1.202368929 | -1.114263202 | 1.07562399   | 1.035922601  |
| YIL077C   | YIL077C   | -1.044372107 | 2.332771962  | 2.223636578  | 1.049079686  |
| THS1      | YIL078W   | -1.079781192 | -2.609602015 | -2.648415339 | 1.014873273  |
| AIR1      | YIL079C   | -1.158451205 | -7.61650854  | -9.070709619 | 1.190927519  |
| YIL082W   | YIL082W   | 1.446361739  | -2.974499737 | -3.349670344 | 1.126128976  |
| YIL082W-A | YIL082W-A | -1.012793573 | -1.548036416 | -1.54518766  | -1.001843631 |
| YIL083C   | YIL083C   | 1.100321305  | -1.987179893 | -2.138623667 | 1.0762104    |
| SDS3      | YIL084C   | 1.046755017  | -1.034500931 | 1.13281517   | -1.171898348 |
| KTR7      | YIL085C   | 1.105398267  | -1.339982249 | -1.605575815 | 1.19820678   |
| YIL086C   | YIL086C   | 1.020275035  | -1.99244866  | -1.991402569 | -1.000525304 |
| YIL087C   | YIL087C   | 1.316426483  | 4.156719565  | 3.959863841  | 1.049712751  |

|         |         |              |              |              |              |
|---------|---------|--------------|--------------|--------------|--------------|
| YIL088C | YIL088C | 1.265153368  | -1.146930138 | -1.091345409 | 1.251696941  |
| YIL089W | YIL089W | 1.183401809  | -1.267047429 | 1.35519736   | -1.069571137 |
| YIL090W | YIL090W | 1.206703736  | -1.599608349 | -1.805508577 | 1.12871915   |
| YIL091C | YIL091C | -1.108534406 | -26.36231389 | -23.13031281 | -1.139730107 |
| YIL092W | YIL092W | -1.053404865 | -1.42318347  | -1.804932357 | 1.268235892  |
| RSM25   | YIL093C | 1.146271224  | -1.057024028 | -1.336163339 | 1.412356756  |
| LYS12   | YIL094C | -1.191769408 | -2.684866497 | -2.648627221 | -1.013682286 |
| PRK1    | YIL095W | -1.027559489 | -1.55582311  | 1.475437867  | 1.054482296  |
| YILO96C | YIL096C | -1.087586557 | -7.171716171 | -8.929343618 | 1.245077664  |
| FYV10   | YIL097W | 1.017039604  | 3.82157083   | 2.893593971  | 1.32070044   |
| FMC1    | YIL098C | 1.00920218   | -1.509173157 | 1.728689679  | -1.145454828 |
| SGA1    | YIL099W | 1.286653235  | 11.15654152  | 11.52074171  | -1.032644543 |
| YIL100W | YIL100W | 1.261189102  | 2.769453804  | 2.267084275  | 1.22159279   |
| XBP1    | YIL101C | 1.167929391  | -1.970655853 | 2.648057011  | -1.343744016 |
| YIL103W | YIL103W | -1.119671695 | -15.70428645 | -21.09509463 | 1.343269858  |
| SHQ1    | YIL104C | 1.017252173  | -3.944223642 | -4.753177555 | 1.205098389  |
| YIL105C | YIL105C | -1.128531944 | 2.344183182  | 2.684692765  | -1.145257242 |
| MOB1    | YIL106W | -1.051230793 | -1.293769619 | -1.27460966  | -1.015032021 |
| PFK26   | YIL107C | -1.198421943 | 2.424170895  | 2.423776294  | 1.000162804  |
| YIL108W | YIL108W | 1.152992343  | -1.790199314 | 1.914228511  | -1.06928234  |
| SEC24   | YIL109C | 1.271865612  | -1.24829589  | 1.02742114   | 1.21497976   |
| YIL110W | YIL110W | -1.05017663  | -3.232281294 | -3.421116474 | 1.058421642  |
| COX5B   | YIL111W | -1.095807096 | 4.149212363  | 4.037854701  | 1.027578422  |
| YIL112W | YIL112W | 1.036820781  | -1.341631516 | 1.179531766  | 1.137427202  |
| SDP1    | YIL113W | -1.043861399 | 7.28411678   | 7.864282517  | -1.079648055 |
| POR2    | YIL114C | 1.082747339  | -1.535386532 | -1.450918914 | -1.058216636 |
| NUP159  | YIL115C | 1.011874191  | -1.634615176 | -1.599182299 | -1.022156872 |
| HIS5    | YIL116W | 1.039774075  | -1.024040398 | 1.077861496  | -1.052557592 |
| PRM5    | YIL117C | 1.017302368  | 3.399961877  | 4.14451248   | -1.218987926 |
| RHO3    | YIL118W | -1.10742604  | -1.490545902 | -1.575072693 | 1.056708614  |
| RPI1    | YIL119C | 1.198793071  | -1.13103659  | -1.225041163 | 1.385566381  |
| QDR1    | YIL120W | 1.128798156  | -1.288692819 | 1.089153475  | 1.1832059    |
| YIL121W | YIL121W | 1.273131195  | -2.058516677 | -2.812101884 | 1.366081662  |
| POG1    | YIL122W | -1.132779755 | -1.535349295 | 1.344388494  | 1.142042871  |
| SIM1    | YIL123W | 1.067058594  | -1.806374485 | -2.035654332 | 1.126928192  |
| AYR1    | YIL124W | 1.405454117  | 3.319690782  | 2.563572851  | 1.294946925  |
| KGD1    | YIL125W | 1.311177985  | -1.588313637 | 1.315060351  | 1.207787639  |
| STH1    | YIL126W | 1.071543088  | -1.13577085  | -1.279332514 | 1.126400202  |
| YIL127C | YIL127C | -1.080198686 | -13.82814939 | -14.67997926 | 1.061601147  |
| MET18   | YIL128W | 1.10791691   | -1.414403311 | -1.474195848 | 1.042274036  |
| TAO3    | YIL129C | 1.17057554   | -1.308150795 | 1.00801619   | 1.297747802  |
| GIN1    | YIL130W | 1.028924456  | -1.381915702 | -2.056366359 | 1.488054846  |
| FKH1    | YIL131C | 1.000999481  | -1.972251206 | -2.447167546 | 1.240799113  |
| CSM2    | YIL132C | -1.166560447 | -1.357177204 | -1.039909669 | -1.305091437 |
| RPL16A  | YIL133C | 1.08390394   | -13.74271412 | -10.62509742 | -1.293420058 |
| FLX1    | YIL134W | 1.327604983  | -1.071468435 | -1.574111462 | 1.469116037  |
| YIL135C | YIL135C | 1.197575358  | -1.844606066 | 1.625043828  | 1.135111579  |
| OM45    | YIL136W | -1.22977087  | 16.54197915  | 19.81426235  | -1.197816909 |
| YIL137C | YIL137C | 1.176678956  | -1.217622708 | 1.12537419   | 1.081971418  |

|         |         |              |              |              |              |
|---------|---------|--------------|--------------|--------------|--------------|
| TPM2    | YIL138C | 1.026698063  | -1.218444816 | 1.169062323  | 1.042241113  |
| REV7    | YIL139C | 1.018097103  | -1.265662456 | -1.504764468 | 1.188914517  |
| AXL2    | YIL140W | 1.25924896   | -1.561367003 | -2.097644978 | 1.343466958  |
| CCT2    | YIL142W | -1.14204993  | -1.628084242 | -1.441811256 | -1.129193738 |
| SSL2    | YIL143C | -1.045864802 | -1.180460095 | 1.301346056  | -1.1024058   |
| TID3    | YIL144W | 1.064246009  | -1.368923774 | 1.161548849  | 1.178533107  |
| PAN6    | YIL145C | 1.019106307  | -1.535956649 | -1.378268576 | -1.114410266 |
| ECM37   | YIL146C | 1.275363847  | -1.49683874  | 1.093964607  | 1.368269805  |
| SLN1    | YIL147C | 1.207397772  | -1.775385523 | -2.487739566 | 1.401239074  |
| RPL40A  | YIL148W | -1.014859961 | -4.991521    | -3.004652404 | -1.661264042 |
| MLP2    | YIL149C | -1.037505445 | -1.228388892 | -1.244453431 | 1.01307773   |
| DNA43   | YIL150C | 1.307436324  | -1.005668944 | -1.000502788 | -1.00516356  |
| YIL151C | YIL151C | -1.102873386 | -1.649125858 | -1.219143875 | -1.352691747 |
| YIL152W | YIL152W | -1.296923748 | -1.342795401 | 1.943903159  | -1.447654019 |
| RRD1    | YIL153W | 1.116858926  | -1.659470262 | 1.505959687  | 1.101935381  |
| IMP2'   | YIL154C | 1.014445589  | -1.939825979 | 2.245019752  | -1.15733049  |
| GUT2    | YIL155C | -1.064468002 | 3.857684736  | 4.544929583  | -1.178149562 |
| UBP7    | YIL156W | 1.160362716  | -1.389996337 | 1.20396756   | 1.154513114  |
| YIL157C | YIL157C | 1.025695908  | -1.856460659 | 2.110984228  | -1.137101515 |
| YIL158W | YIL158W | -1.10094764  | -4.61969142  | -3.789829844 | -1.218970669 |
| BNR1    | YIL159W | 1.084189194  | -1.609800336 | -1.804510349 | 1.120952896  |
| POT1    | YIL160C | 1.012520337  | 12.31562426  | 11.03274941  | 1.116278798  |
| YIL161W | YIL161W | -1.158364244 | -1.271212755 | 1.719017596  | -1.35226585  |
| SUC2    | YIL162W | 1.291217151  | -1.204213723 | 1.137503646  | 1.058646033  |
| NIT1    | YIL164C | -1.001112423 | -1.574666586 | 1.561467938  | 1.008452718  |
| YIL165C | YIL165C | -1.145318093 | -1.445458081 | 1.678524878  | -1.161240786 |
| YIL166C | YIL166C | 1.042596962  | 2.162693891  | 2.301653545  | -1.064253039 |
| YIL167W | YIL167W | -1.270822906 | -1.278570565 | 1.761404295  | -1.377635575 |
| SDL1    | YIL168W | -1.094952828 | -1.273480649 | 1.640127261  | -1.287909056 |
| YIL169C | YIL169C | 1.223820918  | 4.348882045  | 4.005439028  | 1.085744164  |
| YIL172C | YIL172C | 1.257087021  | -1.550718986 | 1.564869457  | -1.009125104 |
| VTH1    | YIL173W | 1.079577018  | -1.275866319 | 1.073836973  | 1.188137819  |
| YIL175W | YIL175W | 1.381593617  | -1.399295797 | 1.35954811   | 1.029235954  |
| YIL176C | YIL176C | 1.045031005  | -1.072017808 | 1.11084348   | -1.190843993 |
| YIL177C | YIL177C | -1.008796604 | -1.047641074 | 1.206724253  | -1.151848932 |
| SGN1    | YIR001C | -1.18496176  | -1.072521913 | -1.062730778 | -1.009213185 |
| MPH1    | YIR002C | -1.120302307 | -1.705332359 | 2.028383181  | -1.189435696 |
| YIR003W | YIR003W | 1.121049578  | -1.839037529 | 1.51847805   | 1.211105771  |
| DJP1    | YIR004W | -1.155294301 | -1.445115777 | -1.315220387 | -1.098763212 |
| IST3    | YIR005W | -1.101374669 | -1.00191223  | -1.04484729  | 1.042853114  |
| PAN1    | YIR006C | 1.166217465  | -1.336419029 | 1.01444549   | 1.317388705  |
| YIR007W | YIR007W | -1.058610829 | 2.375812287  | 2.226764118  | 1.066934871  |
| PRI1    | YIR008C | -1.130418046 | -1.136441903 | -1.229878963 | 1.082218951  |
| MSL1    | YIR009W | -1.155193158 | -1.113091254 | 1.291863788  | -1.160609055 |
| DSN1    | YIR010W | -1.152035276 | -1.046575706 | 1.280542111  | -1.340184264 |
| STS1    | YIR011C | -1.173011555 | -1.05992195  | -1.079954129 | 1.144667087  |
| SQT1    | YIR012W | 1.026047115  | -3.825746107 | -3.477729879 | -1.100069942 |
| GAT4    | YIR013C | 1.345117839  | -1.655062665 | 1.345818802  | 1.229781202  |
| YIR014W | YIR014W | -1.096935358 | 2.160252544  | 4.10978759   | -1.902457008 |

|           |           |              |              |              |              |
|-----------|-----------|--------------|--------------|--------------|--------------|
| RPR2      | YIRO15W   | 1.235818672  | 2.325563814  | 1.813207214  | 1.282569249  |
| YIRO16W   | YIRO16W   | 1.108829699  | 4.182138858  | 4.169558272  | 1.003017247  |
| MET28     | YIRO17C   | -1.078892969 | 2.203013853  | 2.201107566  | 1.000866058  |
| YAP5      | YIRO18W   | -1.213859076 | -1.318403974 | 1.620441192  | -1.229093072 |
| MUC1      | YIRO19C   | 1.420209552  | -1.021630519 | -1.409594713 | 1.440084978  |
| YIRO20C   | YIRO20C   | 1.37909739   | 2.211852975  | 1.92289719   | 1.150271053  |
| MRS1      | YIRO21W   | -1.039503378 | -1.641423322 | -1.559591766 | -1.052469856 |
| SEC11     | YIRO22W   | 1.091114313  | -1.259030173 | -1.115596621 | -1.12857116  |
| DAL81     | YIRO23W   | -1.084056965 | -1.306921336 | -1.341657253 | 1.026578429  |
| GIF1      | YIRO24C   | -1.108302464 | -1.654389623 | 1.876909947  | -1.134502973 |
| MND2      | YIRO25W   | -1.036114176 | -1.612834514 | 1.688080109  | -1.046654256 |
| YVH1      | YIRO26C   | -1.101754294 | -6.905470189 | -6.044287225 | -1.142478829 |
| DAL1      | YIRO27C   | 1.418451337  | 2.07208321   | 1.320310341  | 1.569391033  |
| DAL4      | YIRO28W   | 1.522942985  | 2.32455966   | 2.000804707  | 1.16181237   |
| DAL2      | YIRO29W   | -1.05636555  | -1.536789561 | 1.736077412  | -1.129678035 |
| DCG1      | YIRO30C   | -1.297293248 | -2.081857264 | -1.593997047 | -1.306060928 |
| DAL7      | YIRO31C   | -1.159451805 | -1.132919729 | 1.289963049  | -1.138618223 |
| DAL3      | YIRO32C   | -1.175676326 | -1.320648758 | 1.600325586  | -1.211772303 |
| MGA2      | YIRO33W   | -1.129807105 | -1.656741595 | -1.356502018 | -1.221333675 |
| LYS1      | YIRO34C   | 1.274986974  | -1.69991695  | 2.107748005  | -1.239912341 |
| YIRO35C   | YIRO35C   | 1.125932683  | -1.946745435 | -2.028221858 | 1.041852634  |
| YIRO36C   | YIRO36C   | -1.00871605  | 2.116490578  | 2.052662779  | 1.031095121  |
| HYR1      | YIRO37W   | 1.128332485  | -1.469619637 | 1.738058441  | -1.182658694 |
| GTT1      | YIRO38C   | -1.057566817 | 2.551139888  | 3.076426084  | -1.205902546 |
| YPS6      | YIRO39C   | 1.183143673  | 6.826644178  | 8.077185306  | -1.183185339 |
| YIRO41W   | YIRO41W   | -1.000678356 | -1.264034889 | 1.551884837  | -1.227723104 |
| YIRO42C   | YIRO42C   | 1.303796111  | -1.385571091 | -1.619783312 | 1.169036596  |
| YIRO43C   | YIRO43C   | 1.891327414  | 3.444389776  | 1.80344516   | 1.90989438   |
| YIRO44C   | YIRO44C   | 1.500778609  | -1.370367397 | 1.455603996  | -1.062199815 |
| PRE3      | YJL001W   | 1.006915657  | -1.228492564 | 1.321833237  | -1.075979844 |
| OST1      | YJL002C   | 1.267848677  | -1.424877548 | -2.21478764  | 1.55437051   |
| COX16     | YJL003W   | -1.130802508 | -1.128604919 | 1.180352429  | -1.045850863 |
| SYS1      | YJL004C   | 1.138428977  | -1.179462943 | -1.148996132 | -1.026516026 |
| CYR1      | YJL005W   | 1.058817005  | 2.168234755  | 2.082052536  | 1.041392912  |
| CTK2      | YJL006C   | -1.149586523 | -1.747095162 | -1.707596519 | -1.023131134 |
| CCT8      | YJL008C   | -1.273111861 | -2.12523777  | -1.868635863 | -1.137320445 |
| YJL009W   | YJL009W   | -1.077023113 | -1.261631157 | -1.453255458 | 1.151886152  |
| YJL010C   | YJL010C   | -1.007540307 | -6.304920634 | -8.084589282 | 1.282266622  |
| RPC17     | YJL011C   | -1.029828821 | -2.576771928 | -4.23876256  | 1.64498942   |
| VTC4      | YJL012C   | 1.121632192  | -2.534700409 | -3.482460238 | 1.373913945  |
| YJL012C-A | YJL012C-A | 1.053782115  | -2.71643268  | -3.186374848 | 1.172999748  |
| MAD3      | YJL013C   | -1.220484911 | -1.443645244 | 1.687801827  | -1.169125057 |
| CCT3      | YJL014W   | -1.141098572 | -1.971184713 | -1.666880179 | -1.182559334 |
| YJL016W   | YJL016W   | 1.224117282  | 3.431470903  | 2.352764161  | 1.458484858  |
| YJL017W   | YJL017W   | 1.132189192  | 3.102282655  | 2.016293931  | 1.538606354  |
| YJL018W   | YJL018W   | 1.194208126  | -1.425378487 | -1.515032667 | 1.062898508  |
| MPS3      | YJL019W   | 1.176553901  | -1.500757052 | -1.621567266 | 1.080499514  |
| BBC1      | YJL020C   | 1.428286117  | 2.419758951  | 1.594131906  | 1.517916392  |
| PET130    | YJL023C   | -1.075109588 | -1.416358404 | 1.107482886  | 1.278898683  |



|           |           |              |              |              |              |
|-----------|-----------|--------------|--------------|--------------|--------------|
| APS3      | YJL024C   | -1.037073072 | -1.016194843 | -1.196706495 | 1.216086969  |
| RRN7      | YJL025W   | 1.17193098   | -2.036084549 | -2.598096564 | 1.276025873  |
| RNR2      | YJL026W   | 1.057957311  | -1.055111861 | 1.201852348  | -1.139075762 |
| YJL027C   | YJL027C   | 1.440060197  | -1.221248166 | -1.281168656 | 1.049064958  |
| VPS53     | YJL029C   | -1.090812663 | -1.134243766 | -1.005694897 | 1.140703168  |
| MAD2      | YJL030W   | -1.287221531 | -1.184180871 | 1.763312529  | -1.489056759 |
| BET4      | YJL031C   | 1.053702647  | -1.652951088 | 1.331165008  | 1.241732677  |
| HCA4      | YJL033W   | 1.060310296  | -28.33915957 | -31.02614303 | 1.094815213  |
| KAR2      | YJL034W   | 1.072213712  | 5.978831631  | 8.075781823  | -1.350729092 |
| TAD2      | YJL035C   | -1.122644179 | -1.181759544 | 1.304167809  | -1.541212755 |
| SNX4      | YJL036W   | -1.177122072 | -1.867554615 | 1.793700007  | 1.041174448  |
| NUP192    | YJL039C   | 1.188029311  | -1.592556073 | -1.768755636 | 1.110639472  |
| NSP1      | YJL041W   | 1.038875933  | -1.47988403  | -1.600156847 | 1.081271785  |
| MHP1      | YJL042W   | 1.148275248  | 2.803836624  | 2.732068432  | 1.026268812  |
| YJL043W   | YJL043W   | 1.170105654  | -1.101182544 | -1.051443109 | 1.157830798  |
| GYP6      | YJL044C   | -1.096849349 | -1.083882242 | -1.239570183 | 1.143639165  |
| YJL045W   | YJL045W   | -1.330536604 | 4.074668266  | 5.11503265   | -1.255324929 |
| YJL046W   | YJL046W   | -1.062615779 | -1.401604479 | 1.015944786  | 1.379606941  |
| RTT101    | YJL047C   | -1.08664276  | -1.454685786 | 1.478050006  | -1.016061352 |
| YJL048C   | YJL048C   | -1.057305188 | 3.372879786  | 4.362946889  | -1.293537619 |
| YJL049W   | YJL049W   | 1.002352114  | -1.09144518  | -1.086985328 | 1.186384897  |
| MTR4      | YJL050W   | -1.025267468 | -50.49089946 | -62.27001756 | 1.233291906  |
| YJL051W   | YJL051W   | 1.022348612  | -1.06394592  | -1.136442353 | 1.068139209  |
| TDH1      | YJL052W   | -1.02414112  | -1.262805583 | 2.222394045  | -1.75988614  |
| PEP8      | YJL053W   | -1.201852104 | 2.088134439  | 1.772321704  | 1.178191541  |
| TIM54     | YJL054W   | -1.436831625 | -1.561092117 | -1.171385586 | -1.332688515 |
| YJL055W   | YJL055W   | -1.137836785 | -1.695898298 | 2.031084212  | -1.197645056 |
| ZAP1      | YJL056C   | 1.083249554  | -1.265791063 | -1.578547027 | 1.247083404  |
| IKS1      | YJL057C   | -1.329823977 | 4.69614336   | 6.624064917  | -1.410532944 |
| BIT1      | YJL058C   | -1.008194561 | -1.153963438 | -1.067678788 | -1.080815176 |
| YHC3      | YJL059W   | -1.018440662 | -1.481539383 | 1.640488818  | -1.107286676 |
| BNA3      | YJL060W   | 1.295159938  | -1.501209133 | 1.153462676  | 1.301480458  |
| NUP82     | YJL061W   | -1.088245777 | -1.037411498 | -1.136677322 | 1.179202122  |
| LAS21     | YJL062W   | 1.245080074  | -1.128537944 | -1.469486344 | 1.30211514   |
| YJL062W-A | YJL062W-A | 1.144891467  | -1.216606493 | 1.757204501  | -1.444349106 |
| MRPL8     | YJL063C   | -1.273624637 | -1.127109288 | 1.194849642  | -1.346726129 |
| YJL065C   | YJL065C   | -1.13369379  | -1.30647297  | -1.192625374 | -1.095459646 |
| MPM1      | YJL066C   | -1.069452926 | 4.099104233  | 4.129656381  | -1.007453372 |
| YJL067W   | YJL067W   | 1.183687249  | -1.431543846 | 2.104595487  | -1.470157894 |
| YJL068C   | YJL068C   | 1.009634305  | 2.281558296  | 2.376249382  | -1.041502813 |
| UTP18     | YJL069C   | -1.11163136  | -10.45731675 | -10.04170472 | -1.041388593 |
| YJL070C   | YJL070C   | 1.1127914    | 2.990530293  | 2.167707652  | 1.379581923  |
| ARG2      | YJL071W   | -1.344116803 | -1.233566084 | 1.048767038  | -1.293723448 |
| YJL072C   | YJL072C   | -1.014082314 | -1.304552352 | -1.26448634  | -1.031685602 |
| JEM1      | YJL073W   | -1.167590293 | -1.058413513 | 1.433543776  | -1.517282104 |
| SMC3      | YJL074C   | -1.034260439 | -2.294454415 | -1.740199773 | -1.318500583 |
| NET1      | YJL076W   | 1.300657898  | -1.745736897 | -2.526837603 | 1.447433235  |
| PRY3      | YJL078C   | 1.297820708  | -1.010279395 | -1.416871778 | 1.402455386  |
| PRY1      | YJL079C   | 1.255762831  | -1.10701846  | -2.086773566 | 1.885039538  |

|         |         |              |              |              |              |
|---------|---------|--------------|--------------|--------------|--------------|
| SCP160  | YJL080C | 1.008673716  | -3.394207333 | -3.13620866  | -1.082264511 |
| ARP4    | YJL081C | -1.158806087 | -1.264066088 | -1.355784036 | 1.072557874  |
| IML2    | YJL082W | 1.11298298   | 3.963704724  | 4.352610374  | -1.098116705 |
| YJL083W | YJL083W | 1.344120863  | 2.701062346  | 2.074976847  | 1.301731318  |
| YJL084C | YJL084C | 1.167263296  | -1.809993734 | 1.262702488  | 1.4334285    |
| EXO70   | YJL085W | -1.110784104 | -1.168178904 | -1.026170565 | 1.198750807  |
| TRL1    | YJL087C | 1.011247464  | -2.142819049 | -2.440098063 | 1.138732673  |
| ARG3    | YJL088W | 1.055075502  | 2.228406167  | 2.174622117  | 1.024732595  |
| DPB11   | YJL090C | -1.103718488 | -1.047435332 | -1.175950102 | 1.122694707  |
| YJL091C | YJL091C | 1.20792051   | 2.229830166  | 1.709997341  | 1.303996276  |
| HPR5    | YJL092W | 1.112298198  | -1.211951522 | -1.351739273 | 1.115341042  |
| TOK1    | YJL093C | 1.175815724  | -1.30590358  | 1.2880686    | 1.013846296  |
| KHA1    | YJL094C | 1.205206366  | -1.920209006 | 1.435615143  | 1.337551373  |
| BCK1    | YJL095W | 1.002813764  | -1.342812022 | -1.45156281  | 1.080987351  |
| MRPL49  | YJL096W | -1.111586816 | -1.145891677 | 1.090103238  | -1.249140227 |
| YJL097W | YJL097W | 1.109913695  | -1.386212073 | -1.026273085 | -1.350724377 |
| SAP185  | YJL098W | -1.006845746 | -4.890063588 | -4.914699638 | 1.005037982  |
| CHS6    | YJL099W | -1.017870742 | -1.507288445 | 1.216495454  | 1.239041576  |
| LSB6    | YJL100W | -1.147016999 | -1.489312068 | 2.257195152  | -1.515595825 |
| GSH1    | YJL101C | 1.125520414  | -1.889976461 | -2.033453867 | 1.075914917  |
| MEF2    | YJL102W | 1.02294988   | 3.228409369  | 3.001679339  | 1.075534394  |
| YJL103C | YJL103C | 1.004013503  | 3.658426442  | 3.390452365  | 1.079037853  |
| MIA1    | YJL104W | -1.341107158 | -1.434082547 | -1.199213426 | -1.195852645 |
| SET4    | YJL105W | 1.003508385  | -1.053255995 | -1.107922491 | 1.166926006  |
| IME2    | YJL106W | 1.120655335  | 2.243974577  | 1.638863595  | 1.369225959  |
| YJL107C | YJL107C | -1.030329141 | 2.613958576  | 2.676147146  | -1.023790955 |
| PRM10   | YJL108C | 1.075741932  | 2.678987161  | 2.648458785  | 1.011526846  |
| UTP10   | YJL109C | 1.277127937  | -16.51537652 | -17.48442589 | 1.058675584  |
| GZF3    | YJL110C | -1.209362646 | -1.327934256 | -1.289291597 | -1.029972009 |
| CCT7    | YJL111W | -1.147846981 | -2.556777286 | -3.163066902 | 1.237130398  |
| MDV1    | YJL112W | -1.32938363  | -1.370759642 | -1.251780694 | -1.095047758 |
| ASF1    | YJL115W | -1.059657143 | -1.448099811 | -1.253189865 | -1.155531058 |
| NCA3    | YJL116C | 1.218234945  | -1.898322077 | 1.190559104  | 1.594479493  |
| PHO86   | YJL117W | 1.094089539  | -1.678383849 | -1.940390415 | 1.156106463  |
| YJL118W | YJL118W | 1.026063911  | -2.093102769 | -1.654419079 | -1.265158747 |
| YJL119C | YJL119C | 1.085228309  | -1.236860071 | -1.021546242 | -1.210772475 |
| RPE1    | YJL121C | 1.359589512  | -1.926565259 | -2.279704401 | 1.18329986   |
| YJL122W | YJL122W | -1.084948955 | -20.10877153 | -31.40934191 | 1.56197219   |
| YJL123C | YJL123C | -1.018499101 | -1.161553537 | 1.128847917  | 1.028972565  |
| LSM1    | YJL124C | -1.235954091 | -2.014367299 | -1.55760963  | -1.293242709 |
| GCD14   | YJL125C | -1.133977795 | -4.679662917 | -4.321197085 | -1.082955214 |
| NIT2    | YJL126W | -1.08574452  | -1.177972272 | 1.098410289  | 1.072433757  |
| SPT10   | YJL127C | 1.175727148  | -1.104608997 | -1.3025574   | 1.438816624  |
| PBS2    | YJL128C | 1.006104177  | -1.3297685   | 1.160945214  | 1.145418823  |
| TRK1    | YJL129C | 1.08873365   | -1.698622543 | -1.445342135 | -1.175239067 |
| URA2    | YJL130C | 1.172578725  | -4.299322926 | -5.112743997 | 1.189197482  |
| YJL131C | YJL131C | -1.037290817 | -1.94641288  | 1.670316315  | 1.165295976  |
| YJL132W | YJL132W | -1.00627033  | 2.335566594  | 1.900940438  | 1.22863744   |
| MRS3    | YJL133W | 1.045003905  | -1.646533066 | -1.694686589 | 1.029245403  |

|         |         |              |              |              |              |
|---------|---------|--------------|--------------|--------------|--------------|
| LCB3    | YJL134W | 1.123755194  | -2.139358978 | -2.215249552 | 1.035473511  |
| RPS21B  | YJL136C | 1.021095838  | -7.407235095 | -4.898327491 | -1.512196787 |
| GLG2    | YJL137C | 1.021803046  | -1.900537545 | 1.741052589  | 1.091602608  |
| TIF2    | YJL138C | 1.099850797  | -3.497056973 | -3.490916679 | -1.001758935 |
| YUR1    | YJL139C | -1.021238215 | -1.297106402 | 1.215518071  | 1.067122269  |
| RPB4    | YJL140W | -1.155966617 | -1.054304345 | 1.205495111  | -1.143403341 |
| YAK1    | YJL141C | -1.061395318 | 4.744365842  | 4.635886949  | 1.023399814  |
| YJL142C | YJL142C | 1.015856134  | 5.304716885  | 5.150870533  | 1.029868029  |
| TIM17   | YJL143W | 1.07227517   | -1.644323273 | -1.409496963 | -1.166602921 |
| YJL144W | YJL144W | -1.09628768  | 11.01883654  | 17.95623837  | -1.629594769 |
| SFH5    | YJL145W | -1.162223184 | -2.511943703 | -2.414991543 | -1.040145962 |
| IDS2    | YJL146W | -1.036566355 | -1.500027988 | 1.692822022  | -1.128526958 |
| YJL147C | YJL147C | -1.171752693 | -1.084301579 | 1.161217673  | -1.070936071 |
| RPA34   | YJL148W | -1.086903333 | -21.12598032 | -24.93850986 | 1.180466397  |
| YJL149W | YJL149W | 1.082061941  | -1.925402813 | 1.867976479  | 1.030742536  |
| SNA3    | YJL151C | 1.002381146  | -1.508689429 | 2.294392248  | -1.520784997 |
| INO1    | YJL153C | 1.091841166  | -1.987739213 | 1.927342963  | 1.031336535  |
| VPS35   | YJL154C | -1.17321877  | -1.440519377 | 1.916300532  | -1.330284453 |
| FBP26   | YJL155C | -1.042309085 | 3.730197435  | 3.090911775  | 1.206827534  |
| SSY5    | YJL156C | 1.114070059  | -1.243279346 | -1.183561419 | 1.471497467  |
| FAR1    | YJL157C | -1.069036422 | -3.962773729 | -6.608571395 | 1.667663068  |
| CIS3    | YJL158C | 1.011832202  | -2.180213791 | -2.07857855  | -1.048896512 |
| HSP150  | YJL159W | 1.104799719  | 2.619585046  | 2.869025629  | -1.09522141  |
| YJL161W | YJL161W | -1.000855197 | 10.27622566  | 14.41546504  | -1.402797634 |
| YJL162C | YJL162C | -1.159014931 | -1.287343187 | -1.766383432 | 1.372115415  |
| YJL163C | YJL163C | -1.046674375 | 4.824831723  | 6.034192833  | -1.250653531 |
| TPK1    | YJL164C | -1.032707405 | 3.946098315  | 3.264342436  | 1.208849375  |
| HAL5    | YJL165C | 1.107519651  | -1.788992382 | 2.033436944  | -1.136638123 |
| QCR8    | YJL166W | 1.067154751  | -1.674177079 | 2.726336077  | -1.628463387 |
| ERG20   | YJL167W | -1.155015094 | -1.332126414 | -1.371892063 | 1.029851258  |
| SET2    | YJL168C | 1.024499643  | -1.097325067 | -1.178730954 | 1.074185754  |
| ASG7    | YJL170C | 1.061249875  | -1.134917771 | 1.022760869  | 1.109660924  |
| YJL171C | YJL171C | 1.165957549  | -1.775919431 | 1.805130459  | -1.016448397 |
| CPS1    | YJL172W | 1.397276147  | -1.785857997 | 1.57107206   | 1.136712977  |
| RFA3    | YJL173C | -1.12808987  | -1.823386712 | -1.31033621  | -1.391541115 |
| KRE9    | YJL174W | 1.000019131  | -1.594294042 | 1.637370265  | -1.027018995 |
| SWI3    | YJL176C | -1.012687711 | -1.266203761 | -1.108149052 | -1.142629467 |
| RPL17B  | YJL177W | -1.221309583 | -8.304904429 | -6.006612011 | -1.38262708  |
| YJL178C | YJL178C | -1.110534824 | -1.441900024 | -1.347978941 | -1.069675482 |
| PFD1    | YJL179W | -1.014263603 | -2.102204605 | -1.906627827 | -1.102577323 |
| ATP12   | YJL180C | -1.217426886 | -1.273853985 | -1.052512187 | -1.210298561 |
| YJL181W | YJL181W | 1.089996957  | -1.057670443 | -1.267329158 | 1.198226882  |
| MNN11   | YJL183W | 1.101817416  | -2.096070429 | -2.227306408 | 1.062610482  |
| YJL184W | YJL184W | -1.189997188 | -1.507711799 | -1.015927239 | -1.484074588 |
| YJL185C | YJL185C | 1.045687933  | 2.908029639  | 2.929064157  | -1.007233254 |
| MNN5    | YJL186W | 1.081972178  | -1.849957385 | -2.177543237 | 1.177077512  |
| SWE1    | YJL187C | -1.093777144 | -1.738332389 | -2.074069402 | 1.193137409  |
| BUD19   | YJL188C | 1.660453058  | -5.57191777  | -5.137055317 | -1.084652088 |
| RPL39   | YJL189W | 1.052168916  | -6.534152305 | -4.315472424 | -1.514122131 |

|         |           |              |              |              |              |
|---------|-----------|--------------|--------------|--------------|--------------|
| RPS22A  | YJL190C   | 1.219472592  | -13.30440662 | -11.48475103 | -1.158441014 |
| RPS14B  | YJL191W   | 1.190667466  | -4.466756218 | -5.425559091 | 1.214653056  |
| YJL192C | YJL192C   | 1.028468775  | -2.077401459 | -1.596397124 | -1.30130619  |
| YJL193W | YJL193W   | 1.35944532   | -1.891630231 | -3.232641631 | 1.708918359  |
| CDC6    | YJL194W   | 1.083516691  | -1.043372794 | -1.081603261 | 1.128515416  |
| ELO1    | YJL196C   | 1.27960657   | -1.180913546 | 1.078323967  | 1.095137994  |
| UBP12   | YJL197W   | 1.084423473  | -1.233577491 | -1.367868978 | 1.108863438  |
| PHO90   | YJL198W   | 1.253782714  | -7.901887688 | -11.3925959  | 1.441756243  |
| YJL199C | YJL199C   | 1.034162865  | 2.787914044  | 5.226123122  | -1.874563936 |
| YJL200C | YJL200C   | -1.141045324 | -12.14947135 | -13.62603848 | 1.121533446  |
| ECM25   | YJL201W   | -1.010138788 | -1.257709337 | -1.171324855 | -1.07374938  |
| PRP21   | YJL203W   | -1.000020309 | -1.074233071 | -1.400530527 | 1.303749219  |
| RCY1    | YJL204C   | 1.063570603  | -1.349197171 | -1.131123285 | 1.526108336  |
| NCE101  | YJL205C-A | 1.411377207  | -1.206266041 | 1.54516303   | -1.280947135 |
| YJL206C | YJL206C   | 1.22056625   | 2.111246276  | 2.097149671  | 1.006721793  |
| YJL207C | YJL207C   | 1.071133943  | -1.865184481 | -2.257931198 | 1.210567223  |
| NUC1    | YJL208C   | -1.177735244 | -6.759392429 | -5.82206039  | -1.16099662  |
| CBP1    | YJL209W   | -1.028282157 | -1.351118629 | -1.549482296 | 1.146814396  |
| PEX2    | YJL210W   | 1.177422015  | -1.30386437  | 1.274867344  | 1.022745132  |
| OPT1    | YJL212C   | 1.41879497   | -2.429295987 | -3.715351583 | 1.529394361  |
| YJL213W | YJL213W   | -1.191763584 | 5.311810194  | 6.214430937  | -1.169927145 |
| HXT8    | YJL214W   | 1.056099626  | -1.30914968  | 1.46404092   | -1.118314385 |
| YJL216C | YJL216C   | 1.204786644  | -1.057408576 | -1.572046763 | 1.486697573  |
| YJL217W | YJL217W   | 1.145173799  | 2.65002024   | 2.115042714  | 1.252939348  |
| YJL218W | YJL218W   | -1.249729318 | -1.219736964 | 1.433098117  | -1.174923906 |
| HXT9    | YJL219W   | 2.327324443  | 2.355126264  | 1.688126019  | 1.395112828  |
| FSP2    | YJL221C   | 1.24694072   | -1.529017571 | 1.566959209  | -1.02481439  |
| VTH2    | YJL222W   | 1.122570823  | -1.267189827 | 1.033706686  | 1.225869818  |
| PAU1    | YJL223C   | 1.057998748  | -1.082611245 | 1.105354126  | -1.196668808 |
| YJL225C | YJL225C   | 1.008172031  | -1.056649484 | 1.181168336  | -1.117843101 |
| YJR001W | YJR001W   | 1.152067149  | -1.069951653 | -1.215171091 | 1.135725233  |
| MPP10   | YJR002W   | 1.010752279  | -7.598599655 | -8.240326455 | 1.084453298  |
| YJR003C | YJR003C   | -1.05384041  | -2.589077974 | -3.131174784 | 1.209378326  |
| SAG1    | YJR004C   | 1.335000652  | -1.482449394 | -1.810500662 | 1.221290028  |
| APL1    | YJR005W   | -1.102695975 | -1.04923313  | -1.05740268  | 1.109461924  |
| HYS2    | YJR006W   | -1.219010809 | -1.075866442 | 1.307429919  | -1.406619975 |
| SUI2    | YJR007W   | 1.15439694   | -2.552711783 | -3.349455848 | 1.312116734  |
| YJR008W | YJR008W   | -1.052555406 | 7.232637186  | 7.834058915  | -1.083153864 |
| TDH2    | YJR009C   | 1.052415665  | -1.487919369 | 1.353148263  | -2.013375508 |
| SPC1    | YJR010C-A | 1.299079149  | -1.458961933 | -1.496538639 | 1.025755782  |
| MET3    | YJR010W   | -1.06404875  | -1.759568705 | -1.745091486 | -1.008295966 |
| YJR011C | YJR011C   | -1.242099519 | -1.283614605 | -1.149999401 | -1.116187194 |
| YJR012C | YJR012C   | -1.12456191  | -1.359093586 | 1.350301892  | -1.83518664  |
| YJR013W | YJR013W   | 1.171696366  | -1.263173253 | -1.677599205 | 1.328083223  |
| YJR014W | YJR014W   | -1.202352937 | -1.456195959 | -1.10331471  | -1.319837347 |
| YJR015W | YJR015W   | 1.117604484  | -1.233191709 | -1.399141758 | 1.134569546  |
| ILV3    | YJR016C   | 1.109409172  | -8.364446674 | -8.754880872 | 1.046677827  |
| ESS1    | YJR017C   | -1.143228472 | -1.56439069  | -1.081819284 | -1.446073954 |
| YJR018W | YJR018W   | 1.2625234    | -1.808660331 | -1.937477566 | 1.071222458  |

|         |         |              |              |              |              |
|---------|---------|--------------|--------------|--------------|--------------|
| TES1    | YJR019C | 1.146468499  | -1.983009755 | 1.828029615  | 1.084779885  |
| YJR020W | YJR020W | 1.08955099   | 2.161688221  | 1.980488802  | 1.091492271  |
| REC107  | YJR021C | -1.295582822 | -1.822457267 | 2.563598485  | -1.406671383 |
| LSM8    | YJR022W | 1.059820854  | -1.201968418 | 1.226689468  | -1.020567138 |
| YJR024C | YJR024C | 1.068683933  | -1.645449955 | -1.511368183 | -1.088715492 |
| BNA1    | YJR025C | -1.148369749 | -1.271381936 | 1.635589847  | -1.286466166 |
| YJR030C | YJR030C | -1.040984103 | -1.248101763 | -1.128002417 | -1.106470823 |
| GEA1    | YJR031C | -1.03661452  | -2.436967711 | -2.526306191 | 1.03665969   |
| CPR7    | YJR032W | -1.351123527 | -1.570256321 | -1.249480948 | -1.256726902 |
| RAV1    | YJR033C | 1.038206175  | -1.604097528 | 1.546912881  | 1.036966948  |
| PET191  | YJR034W | 1.119012376  | -1.260191606 | -1.026108694 | 1.293093563  |
| RAD26   | YJR035W | 1.05847523   | -1.763175403 | 1.73243561   | 1.017743686  |
| HUL4    | YJR036C | -1.216726106 | 3.592809801  | 4.42452921   | -1.23149553  |
| YJR039W | YJR039W | 1.034265234  | -1.793275482 | 2.447568302  | -1.364859068 |
| GEF1    | YJR040W | 1.08589878   | -1.003089749 | 1.120035068  | -1.1165851   |
| YJR041C | YJR041C | 1.175629581  | -11.16882886 | -16.87428511 | 1.510837467  |
| NUP85   | YJR042W | -1.037541564 | -1.700455039 | -1.71591048  | 1.009089003  |
| POL32   | YJR043C | -1.121224146 | -1.904812104 | -2.067133495 | 1.085216484  |
| VPS55   | YJR044C | 1.500428218  | -1.56909614  | -1.165822211 | 1.829287131  |
| SSC1    | YJR045C | 1.01667315   | 2.566743767  | 3.253842191  | -1.267692644 |
| TAH11   | YJR046W | 1.038734106  | 3.559768561  | 5.535319939  | -1.554966241 |
| ANB1    | YJR047C | 1.110065091  | -1.967390558 | -1.401909175 | -1.403365206 |
| CYC1    | YJR048W | 1.028814492  | -2.431391757 | -1.903371172 | -1.277413356 |
| UTR1    | YJR049C | 1.024744727  | -1.417000072 | 1.426540034  | -1.006732507 |
| ISY1    | YJR050W | -1.16145114  | -1.065569911 | 1.049830752  | 1.014992092  |
| OSM1    | YJR051W | -1.058136009 | -1.524617902 | 1.327320633  | 1.148643262  |
| RAD7    | YJR052W | -1.192772815 | -1.586961265 | 1.852778162  | -1.167500558 |
| YJR054W | YJR054W | -1.079875623 | -1.382517629 | -1.46308076  | 1.058272769  |
| YJR056C | YJR056C | -1.036850566 | -1.502270908 | 1.553402333  | -1.034036088 |
| CDC8    | YJR057W | -1.069236441 | -1.517716362 | -1.459086157 | -1.040182825 |
| APS2    | YJR058C | -1.045787605 | -1.057341956 | 1.464838528  | -1.385397146 |
| PTK2    | YJR059W | 1.12391493   | 2.940178628  | 2.596255579  | 1.132468872  |
| CBF1    | YJR060W | -1.030262635 | -1.551129922 | 1.254634578  | 1.23632008   |
| YJR061W | YJR061W | 1.093523707  | -1.430967023 | -1.60496047  | 1.121591514  |
| NTA1    | YJR062C | -1.005947722 | -1.81132175  | 1.766266028  | 1.025509023  |
| RPA12   | YJR063W | 1.12720837   | -12.1927829  | -9.15497185  | -1.331820905 |
| CCT5    | YJR064W | 1.014463993  | -2.056727437 | -2.334296042 | 1.134956436  |
| ARP3    | YJR065C | 1.095211529  | -1.570237546 | 1.336160288  | 1.175186511  |
| TOR1    | YJR066W | 1.149460234  | -1.189788616 | 1.202211682  | -1.010441406 |
| YAE1    | YJR067C | -1.20380152  | -1.641721435 | 1.073585371  | -1.762528116 |
| RFC2    | YJR068W | -1.295557492 | -2.108500772 | -1.335544884 | -1.578756952 |
| HAM1    | YJR069C | -1.076328989 | -2.665245988 | -3.077728099 | 1.154763243  |
| YJR070C | YJR070C | -1.057847513 | -17.38269677 | -17.90981997 | 1.030324593  |
| YJR072C | YJR072C | -1.059582243 | -3.231956138 | -3.16696791  | -1.020520646 |
| OPI3    | YJR073C | 1.238825947  | 3.153843122  | 2.538049492  | 1.242624753  |
| MOG1    | YJR074W | -1.11734528  | -1.462174136 | 1.897850091  | -1.297964479 |
| HOC1    | YJR075W | -1.0753919   | -1.488731238 | -1.493052255 | 1.002902484  |
| CDC11   | YJR076C | -1.230240601 | -1.172190259 | -1.043345415 | -1.123492031 |
| MIR1    | YJR077C | 1.104593832  | -1.037600692 | -1.085735774 | 1.046390758  |

|         |           |              |              |              |              |
|---------|-----------|--------------|--------------|--------------|--------------|
| BNA2    | YJR078W   | -1.052193693 | 2.203294792  | 2.683011873  | -1.217727144 |
| YJR080C | YJR080C   | -1.27263589  | -1.182287097 | 1.213086305  | -1.026050532 |
| EAF6    | YJR082C   | -1.170483977 | -1.249567554 | -1.196593902 | -1.044270368 |
| YJR083C | YJR083C   | -1.043111927 | -1.065969516 | -1.010743705 | -1.054638788 |
| CSN12   | YJR084W   | -1.090015656 | -1.017298008 | 1.037492478  | -1.019851086 |
| YJR085C | YJR085C   | 1.058704664  | -1.262171394 | 2.113335037  | -1.674364551 |
| STE18   | YJR086W   | 1.089991834  | -1.751907145 | 1.404112159  | 1.247697439  |
| YJR087W | YJR087W   | 1.203858454  | -2.191845896 | -1.262678902 | -1.73586958  |
| YJR088C | YJR088C   | -1.160404535 | -1.167963906 | 1.090999693  | 1.07054467   |
| BIR1    | YJR089W   | -1.091085173 | -1.169096911 | -1.158326915 | -1.00929789  |
| GRR1    | YJR090C   | 1.013371799  | -1.371356485 | 1.174352504  | 1.167755406  |
| JSN1    | YJR091C   | 1.25735151   | 2.969249472  | 2.354856319  | 1.26090473   |
| BUD4    | YJR092W   | 1.158969756  | -1.101649956 | -1.272602109 | 1.155178288  |
| FIP1    | YJR093C   | -1.040081859 | -1.009676593 | -1.295230205 | 1.282816909  |
| IME1    | YJR094C   | 1.133679596  | -1.147578699 | -1.070538463 | 1.228527136  |
| RPL43B  | YJR094W-A | 1.286875825  | -6.702773541 | -6.335248082 | -1.058012797 |
| YJR096W | YJR096W   | -1.165384868 | 6.7361338    | 7.751466443  | -1.150729287 |
| YJR097W | YJR097W   | -1.369878099 | -6.527878102 | -1.897622681 | -3.440029552 |
| YJR098C | YJR098C   | -1.255752608 | -1.290872393 | 1.246760138  | 1.035381509  |
| YUH1    | YJR099W   | -1.22612274  | -1.230328855 | 1.246550739  | -1.013184998 |
| YJR100C | YJR100C   | -1.037946511 | -1.122477837 | 1.110541803  | 1.010747938  |
| RSM26   | YJR101W   | -1.097284476 | -1.311941557 | -1.522648454 | 1.160606923  |
| VPS25   | YJR102C   | -1.011037877 | -1.011199765 | -1.103770563 | 1.09154551   |
| URA8    | YJR103W   | 1.027834274  | 2.359912611  | 2.342588851  | 1.007395134  |
| SOD1    | YJR104C   | -1.262850256 | -1.066308291 | 3.197932223  | -3.409981645 |
| ADO1    | YJR105W   | 1.160842622  | -1.661045493 | -1.654636217 | -1.003873526 |
| ECM27   | YJR106W   | 1.193788703  | 2.084902961  | 1.80096454   | 1.157659084  |
| YJR107W | YJR107W   | 1.164227267  | -1.474709304 | 1.418949305  | 1.039296682  |
| CPA2    | YJR109C   | 1.265281605  | -1.370709684 | -1.631980851 | 1.190610142  |
| YJR110W | YJR110W   | -1.189217135 | -1.170221689 | 1.289953102  | -1.102315154 |
| YJR111C | YJR111C   | 1.035927165  | -1.739681184 | -1.865375542 | 1.072251376  |
| NNF1    | YJR112W   | -1.164891607 | -2.941596861 | -2.415384506 | -1.217858628 |
| RSM7    | YJR113C   | -1.068816581 | -1.455430589 | 1.66275525   | -1.14244902  |
| YJR115W | YJR115W   | 1.093356259  | 2.167071059  | 2.372772588  | -1.094921451 |
| YJR116W | YJR116W   | 1.123834343  | -1.512730888 | -1.208614569 | -1.251623907 |
| STE24   | YJR117W   | 1.243521645  | 2.482803309  | 2.22795673   | 1.114385785  |
| ILM1    | YJR118C   | 1.301433864  | -1.584784707 | -2.155219282 | 1.359944522  |
| YJR119C | YJR119C   | -1.039658484 | -1.164019214 | -1.199425461 | 1.030417235  |
| ATP2    | YJR121W   | 1.179127244  | -1.511156447 | 1.394572467  | 1.083598367  |
| CAF17   | YJR122W   | 1.054245248  | -1.171288538 | -1.00900555  | 1.181836648  |
| RPS5    | YJR123W   | -1.321110835 | -14.2849452  | -10.03052252 | -1.424147663 |
| YJR124C | YJR124C   | 1.161230344  | -3.97914077  | -4.864316595 | 1.222454012  |
| ENT3    | YJR125C   | -1.240089186 | 2.087204738  | 2.751042006  | -1.318050863 |
| VPS70   | YJR126C   | -1.036838689 | -1.023013936 | 1.26630792   | -1.237820791 |
| ZMS1    | YJR127C   | 1.154723929  | 2.748164259  | 2.243913057  | 1.224719582  |
| YJR129C | YJR129C   | 1.021735464  | -3.618595011 | -2.858083298 | -1.266091514 |
| STR2    | YJR130C   | -1.206152118 | -1.128354956 | 1.320278689  | -1.17009163  |
| MNS1    | YJR131W   | 1.111873201  | -1.642966793 | 1.68157445   | -1.023498745 |
| NMD5    | YJR132W   | 1.258893365  | -2.764535099 | -3.649243653 | 1.320020735  |

|           |           |              |              |              |              |
|-----------|-----------|--------------|--------------|--------------|--------------|
| XPT1      | YJR133W   | 1.07808279   | -1.390982393 | -1.357131369 | -1.024943071 |
| SGM1      | YJR134C   | -1.147406679 | -1.121453564 | 1.07219535   | -1.202417297 |
| MCM22     | YJR135C   | -1.183443859 | -1.219946842 | -1.080143541 | -1.129430299 |
| TIM8      | YJR135W-A | 1.458547337  | -1.953380345 | -1.742105371 | -1.121275657 |
| YJR136C   | YJR136C   | -1.0874145   | -1.443236529 | -1.328639955 | -1.086251038 |
| ECM17     | YJR137C   | -1.027179182 | -1.411312536 | -1.14658652  | -1.230881849 |
| IML1      | YJR138W   | 1.075999117  | -1.378417154 | 1.04278647   | 1.321859453  |
| HOM6      | YJR139C   | 1.057104904  | -1.24093168  | -1.026787874 | -1.208557008 |
| HIR3      | YJR140C   | -1.062879512 | -1.535408942 | -1.447314022 | -1.060867869 |
| YJR141W   | YJR141W   | -1.062754221 | -2.052723867 | -1.98108045  | -1.03616381  |
| YJR142W   | YJR142W   | -1.255820801 | -1.222527963 | 1.206023339  | 1.013685161  |
| PMT4      | YJR143C   | 1.196453652  | -2.869289341 | -3.045589521 | 1.061443849  |
| MGM101    | YJR144W   | -1.157982969 | -2.170645058 | -2.068020665 | -1.049624452 |
| RPS4A     | YJR145C   | -1.132235039 | -7.304149503 | -5.54055654  | -1.318306104 |
| HMS2      | YJR147W   | 1.166111809  | -4.089790519 | -4.991450807 | 1.22046613   |
| BAT2      | YJR148W   | -1.205984205 | -1.830327376 | 1.842294759  | -1.006538384 |
| YJR149W   | YJR149W   | 1.043615752  | 2.092419463  | 1.771457319  | 1.181185367  |
| DAN4      | YJR151C   | 1.037736392  | -1.698083684 | 1.891992462  | -1.11419271  |
| DAL5      | YJR152W   | 1.059019251  | -1.244759711 | 1.084225819  | 1.148063152  |
| PGU1      | YJR153W   | 1.944957988  | -1.940263108 | 1.080763254  | 1.795271167  |
| AAD10     | YJR155W   | 1.033025028  | 2.273225655  | 1.853269124  | 1.226603102  |
| THI11     | YJR156C   | -1.074754045 | -1.063306359 | 1.646653885  | -1.548616606 |
| YJR160C   | YJR160C   | 1.290932596  | 2.002607503  | 1.373936098  | 1.45756961   |
| COS5      | YJR161C   | 1.469972643  | -1.978179997 | 1.134296165  | 1.743971335  |
| YJR162C   | YJR162C   | 1.515700202  | -1.520019153 | -1.407153112 | -1.080208785 |
| MET14     | YKL001C   | -1.214662852 | -2.207266474 | -1.601873942 | -1.377927699 |
| DID4      | YKL002W   | -1.237302603 | -1.384543952 | -1.226622326 | -1.12874511  |
| MRP17     | YKL003C   | -1.094385751 | -1.03922247  | 1.051998129  | -1.093260094 |
| AUR1      | YKL004W   | 1.057711821  | -4.431588965 | -4.652982605 | 1.049958072  |
| YKL005C   | YKL005C   | 1.023420943  | -1.095393149 | -1.131554689 | 1.239497255  |
| SFT1      | YKL006C-A | -1.142247968 | -1.878931406 | -1.324558736 | -1.418533851 |
| RPL14A    | YKL006W   | 1.124869871  | -13.36610284 | -7.647396741 | -1.747797753 |
| CAP1      | YKL007W   | -1.239071254 | -1.394700625 | 1.223805992  | 1.139641931  |
| LAC1      | YKL008C   | 1.086691588  | -1.128830502 | -1.409920173 | 1.249009634  |
| MRT4      | YKL009W   | -1.125711455 | -14.79417299 | -22.21665747 | 1.501716756  |
| UFD4      | YKL010C   | 1.080341377  | -1.630401952 | 1.499328723  | 1.087421275  |
| CCE1      | YKL011C   | -1.220151916 | -1.154040234 | 1.00221323   | 1.151491718  |
| PRP40     | YKL012W   | -1.02817038  | -1.12023765  | 1.054065738  | 1.062777784  |
| ARC19     | YKL013C   | -1.220515393 | -1.117967935 | 2.093881681  | -1.872935363 |
| YKL014C   | YKL014C   | 1.010768719  | -22.10812799 | -18.33906657 | -1.205520898 |
| PUT3      | YKL015W   | 1.027409649  | -1.117991344 | 1.000813115  | 1.117083026  |
| ATP7      | YKL016C   | 1.053421782  | -1.148104975 | 1.332181165  | -1.160330452 |
| HCS1      | YKL017C   | -1.051668846 | -1.06352279  | -1.104234547 | 1.174378607  |
| YKL018C-A | YKL018C-A | 1.200015744  | -1.443662492 | -1.552763718 | 1.075572529  |
| SWD2      | YKL018W   | 1.285476051  | -1.098032549 | -1.303417187 | 1.431194497  |
| RAM2      | YKL019W   | 1.06635025   | -1.107625722 | 1.275155987  | -1.151251691 |
| SPT23     | YKL020C   | 1.113962399  | -1.766606891 | 1.473846679  | 1.198636816  |
| MAK11     | YKL021C   | -1.143586555 | -4.370481308 | -4.423920375 | 1.012227273  |
| CDC16     | YKL022C   | 1.11593848   | -1.178476131 | -1.157841485 | 1.364488553  |

|           |           |              |              |              |              |
|-----------|-----------|--------------|--------------|--------------|--------------|
| YKL023W   | YKL023W   | -1.145374671 | -1.685888727 | 1.958671565  | -1.161803584 |
| URA6      | YKL024C   | -1.28920891  | -2.752198475 | -2.049993425 | -1.342540148 |
| PAN3      | YKL025C   | 1.301450742  | -1.423070712 | -1.019273637 | 1.450498461  |
| GPX1      | YKL026C   | 1.595328411  | 4.703483075  | 3.52374956   | 1.334794938  |
| YKL027W   | YKL027W   | -1.412262625 | -1.412827311 | -1.073234396 | -1.316420082 |
| TFA1      | YKL028W   | -1.166041059 | -1.344543347 | 1.014819494  | -1.364468799 |
| MAE1      | YKL029C   | 1.094348588  | -4.977588697 | -5.128695186 | 1.030357367  |
| YKL030W   | YKL030W   | 1.347764474  | -1.488083173 | -1.245548095 | -1.194721568 |
| YKL031W   | YKL031W   | 1.068234397  | 2.552495465  | 3.892824993  | -1.525105547 |
| IXR1      | YKL032C   | -1.022580613 | -1.001125768 | 1.059847437  | -1.06104058  |
| YKL033W   | YKL033W   | 1.039791076  | -1.860856295 | -2.193923113 | 1.178985782  |
| YKL033W-A | YKL033W-A | 1.448991793  | -1.591393602 | -1.634167634 | 1.026878349  |
| TUL1      | YKL034W   | 1.073655513  | -1.679285731 | 1.685156879  | -1.003496218 |
| UGP1      | YKL035W   | 1.142429733  | 11.74894753  | 15.72633625  | -1.338531491 |
| YKL037W   | YKL037W   | 1.470502561  | 2.606046001  | 2.065722546  | 1.261566325  |
| RGT1      | YKL038W   | 1.135151097  | -1.83398541  | 1.782809631  | 1.028705128  |
| PTM1      | YKL039W   | 1.055235764  | -1.513428484 | 1.403613479  | 1.078237354  |
| NFU1      | YKL040C   | -1.321395649 | -1.321359306 | 1.176640074  | -1.554764312 |
| VPS24     | YKL041W   | -1.077921086 | -1.00733633  | 1.397449656  | -1.387272171 |
| SPC42     | YKL042W   | -1.065039944 | -1.380100836 | -1.348364762 | -1.023536713 |
| PHD1      | YKL043W   | 1.271451549  | -1.031178932 | 1.010186658  | -1.041683198 |
| YKL044W   | YKL044W   | 1.185354988  | -1.313205801 | -1.80272896  | 1.372769569  |
| PRI2      | YKL045W   | -1.029216117 | -2.023325136 | -2.094494895 | 1.035174652  |
| DCW1      | YKL046C   | 1.148772779  | -1.244450293 | -1.554166392 | 1.248877838  |
| YKL047W   | YKL047W   | -1.113804361 | -2.155683362 | -2.467191565 | 1.144505547  |
| ELM1      | YKL048C   | -1.133603074 | -1.33038297  | -1.215981159 | -1.094081894 |
| CSE4      | YKL049C   | -1.255737259 | -1.230647078 | 1.074492153  | -1.322320629 |
| YKL050C   | YKL050C   | 1.096939896  | -1.101902711 | 1.015260845  | 1.085339514  |
| YKL051W   | YKL051W   | 1.35159886   | 2.119111102  | 1.476708164  | 1.435023625  |
| ASK1      | YKL052C   | -1.123635917 | -1.163005248 | 1.239471604  | -1.441511981 |
| YKL053C-A | YKL053C-A | -1.072806251 | -1.239595763 | 1.452511208  | -1.800526739 |
| YKL053W   | YKL053W   | 1.238565793  | -1.31966059  | 1.344508931  | -1.018829342 |
| DEF1      | YKL054C   | 1.008071345  | -1.278570295 | -1.136046709 | -1.125455746 |
| OAR1      | YKL055C   | 1.344822151  | -1.204864223 | -1.624805341 | 1.348538126  |
| YKL056C   | YKL056C   | 1.106292384  | -3.187942537 | -2.445142174 | -1.303786165 |
| NUP120    | YKL057C   | 1.321516712  | -1.561492485 | -1.681748335 | 1.077013403  |
| TOA2      | YKL058W   | 1.103463674  | -1.721089597 | -1.110825262 | -1.549379236 |
| MPE1      | YKL059C   | 1.03781332   | -1.203103086 | 1.043673045  | 1.152758607  |
| YKL061W   | YKL061W   | 1.081793081  | -1.007762977 | 1.216050521  | -1.225490693 |
| MSN4      | YKL062W   | 1.173603945  | 2.898870251  | 2.01030657   | 1.442004068  |
| YKL063C   | YKL063C   | -1.199934237 | -1.185085803 | -1.015240949 | -1.167295119 |
| MNR2      | YKL064W   | 1.098369028  | -1.787860555 | 2.112450358  | -1.181552081 |
| YET1      | YKL065C   | -1.140871951 | 2.142199959  | 2.641925258  | -1.233276682 |
| YNK1      | YKL067W   | -1.071527331 | -1.945286416 | 2.005267447  | -1.030834036 |
| NUP100    | YKL068W   | 1.033173555  | -1.758153773 | -2.193021758 | 1.247343543  |
| YKL069W   | YKL069W   | -1.236084194 | -1.023520699 | 1.432854693  | -1.399927421 |
| YKL071W   | YKL071W   | 1.184702924  | -1.760675445 | -1.273149605 | -1.382928949 |
| STB6      | YKL072W   | 1.021758651  | -1.538942214 | -1.439214963 | -1.069292812 |
| LHS1      | YKL073W   | -1.000432357 | -1.060971949 | 1.198728282  | -1.12983975  |



|         |           |              |              |              |              |
|---------|-----------|--------------|--------------|--------------|--------------|
| MUD2    | YKL074C   | 1.019409619  | -1.793808552 | -1.644620779 | -1.090712567 |
| YKL075C | YKL075C   | -1.115873175 | -1.039425125 | 1.006723665  | 1.032483055  |
| PSY1    | YKL076C   | -1.071046478 | -1.087081034 | 1.041767028  | -1.132485179 |
| YKL077W | YKL077W   | 1.0882149    | -1.260184035 | -1.589000338 | 1.260927209  |
| DHR2    | YKL078W   | -1.018119307 | -22.095918   | -20.79598504 | -1.062508843 |
| SMY1    | YKL079W   | -1.09361328  | -1.483179723 | 1.578555284  | -1.06430479  |
| VMA5    | YKL080W   | 1.095359784  | -1.75454086  | -1.766862093 | 1.007022483  |
| TEF4    | YKL081W   | 1.023521507  | -3.962845664 | -2.768746493 | -1.431277899 |
| YKL082C | YKL082C   | -1.061607647 | -10.90897293 | -10.28219728 | -1.060957365 |
| YKL084W | YKL084W   | 1.104798799  | -1.792791281 | -1.522202802 | -1.177761123 |
| MDH1    | YKL085W   | -1.097331731 | 3.376958095  | 4.071091607  | -1.205549933 |
| YKL086W | YKL086W   | 1.529930032  | -1.86523033  | 1.458705563  | 1.278688707  |
| CYT2    | YKL087C   | -1.066586116 | -1.341913128 | 1.272559788  | 1.054499081  |
| YKL088W | YKL088W   | -1.003883586 | -1.146456276 | 1.318066748  | -1.14968776  |
| MIF2    | YKL089W   | -1.136170369 | -1.191419165 | 1.034195682  | -1.232160557 |
| CUE2    | YKL090W   | -1.223639712 | -1.208393955 | -1.015509331 | -1.1899388   |
| YKL091C | YKL091C   | -1.162205083 | 9.389150244  | 10.33798869  | -1.101056903 |
| BUD2    | YKL092C   | -1.249592771 | -1.080364714 | 1.087434237  | -1.174825579 |
| MBR1    | YKL093W   | 1.299174052  | 5.209326766  | 4.329553924  | 1.203201728  |
| YJU3    | YKL094W   | -1.148337039 | 2.365722402  | 2.308705035  | 1.024696687  |
| YJU2    | YKL095W   | 1.129712952  | -1.523380456 | 1.129559644  | 1.34864986   |
| CWP1    | YKL096W   | 1.127291243  | 5.051532779  | 4.452340821  | 1.134579086  |
| CWP2    | YKL096W-A | 1.286073973  | -1.44233914  | -1.623803129 | 1.125812289  |
| YKL098W | YKL098W   | -1.061037098 | -1.14716583  | 1.073771736  | -1.231794244 |
| UTP11   | YKL099C   | -1.022840727 | -10.53241012 | -17.54527477 | 1.665836648  |
| YKL100C | YKL100C   | 1.309772247  | 2.977755931  | 1.925968242  | 1.546108532  |
| HSL1    | YKL101W   | -1.155631626 | -2.044068    | -2.135673776 | 1.044815425  |
| LAP4    | YKL103C   | 1.022682595  | 7.164293875  | 7.762851663  | -1.083547353 |
| GFA1    | YKL104C   | 1.34238343   | -1.323146899 | 1.034431512  | 1.279105368  |
| YKL105C | YKL105C   | 1.007194428  | -1.687121223 | 1.595244901  | 1.057593867  |
| AAT1    | YKL106W   | 1.127738023  | -1.854193725 | -1.735970908 | -1.068101842 |
| SLD2    | YKL108W   | -1.122007679 | -1.374131671 | -1.192640455 | -1.152175968 |
| HAP4    | YKL109W   | -1.050011612 | 2.574473423  | 2.271040939  | 1.13360943   |
| KTI12   | YKL110C   | -1.145194992 | -2.937425188 | -2.666862365 | -1.101453613 |
| ABF1    | YKL112W   | -1.166193956 | -1.054390434 | 1.06661549   | -1.011594431 |
| RAD27   | YKL113C   | -1.123248953 | -3.59727818  | -3.148628056 | -1.142490671 |
| APN1    | YKL114C   | -1.259630921 | -1.447895767 | -1.375807886 | -1.052396764 |
| PRR1    | YKL116C   | 1.212947736  | -1.05905698  | -1.384647768 | 1.307434628  |
| SBA1    | YKL117W   | -1.324241109 | -1.381269853 | 1.765172828  | -1.277934811 |
| VPH2    | YKL119C   | -1.228912394 | -1.301747456 | -1.098719287 | -1.184786206 |
| OAC1    | YKL120W   | -1.052569766 | -3.666760476 | -4.515482458 | 1.231463709  |
| YKL121W | YKL121W   | -1.000101392 | 2.313650135  | 1.797206191  | 1.287359317  |
| SRP21   | YKL122C   | -1.076121407 | -2.271395896 | -2.318007075 | 1.02052094   |
| YKL123W | YKL123W   | -1.159672194 | -1.635299642 | 1.642788122  | -1.004579271 |
| SSH4    | YKL124W   | -1.314047774 | -1.577330725 | 1.617080394  | -1.025200593 |
| RRN3    | YKL125W   | -1.049937621 | -2.346286047 | -2.741435632 | 1.168414923  |
| YPK1    | YKL126W   | -1.006607532 | -1.400747413 | 1.594375845  | -1.138232225 |
| PGM1    | YKL127W   | 1.052068328  | -1.554019523 | -1.568514696 | 1.009327536  |
| PMU1    | YKL128C   | -1.13912325  | -1.283117405 | -1.171233874 | -1.095526208 |

|           |           |              |              |              |              |
|-----------|-----------|--------------|--------------|--------------|--------------|
| MYO3      | YKL129C   | -1.007126032 | 2.34340756   | 2.719383222  | -1.160439724 |
| SHE2      | YKL130C   | -1.050758592 | -1.275938075 | -1.29669815  | 1.016270441  |
| RMA1      | YKL132C   | -1.067650372 | -1.855495267 | -1.538796863 | -1.205809104 |
| YKL133C   | YKL133C   | -1.191856019 | 2.626919505  | 2.20147997   | 1.193251604  |
| 39356     | YKL134C   | -1.115098947 | -1.182372701 | 1.211107765  | -1.024302882 |
| APL2      | YKL135C   | 1.062959926  | -1.177503203 | 1.075928027  | -1.266908698 |
| YKL136W   | YKL136W   | -1.199538539 | -1.498621966 | 1.130288042  | -1.693874488 |
| YKL137W   | YKL137W   | -1.077127032 | -1.257425879 | 1.118431422  | 1.124276245  |
| MRPL31    | YKL138C   | -1.182454015 | -1.095886558 | 1.156631793  | -1.267537236 |
| CTK1      | YKL139W   | -1.021005379 | -1.156482592 | -1.274162366 | 1.101756632  |
| TGL1      | YKL140W   | 1.067345432  | -1.654315202 | 1.569362047  | 1.054132286  |
| SDH3      | YKL141W   | 1.142409798  | 2.202230853  | 2.053852027  | 1.072244166  |
| MRP8      | YKL142W   | -1.119158702 | 3.190144899  | 3.411117975  | -1.06926741  |
| LTV1      | YKL143W   | -1.080886231 | -37.51172106 | -25.84744114 | -1.451274067 |
| RPC25     | YKL144C   | -1.110723968 | -6.32270561  | -4.438862547 | -1.424397702 |
| RPT1      | YKL145W   | -1.174214769 | -1.03096414  | 1.316196548  | -1.276665693 |
| YKL146W   | YKL146W   | 1.123569258  | -1.383529009 | 1.453135999  | -1.05031119  |
| SDH1      | YKL148C   | 1.29272898   | 3.391900998  | 3.472600095  | -1.023791702 |
| DBR1      | YKL149C   | -1.174752088 | -1.241201118 | -1.235744214 | -1.004415885 |
| MCR1      | YKL150W   | 1.082362724  | 4.73798071   | 4.256171519  | 1.113202486  |
| YKL151C   | YKL151C   | -1.316960128 | 8.437851521  | 14.08950117  | -1.669797239 |
| YKL153W   | YKL153W   | 1.092798734  | -1.4263334   | 1.311390921  | -1.870480671 |
| SRP102    | YKL154W   | -1.089087186 | -1.928180191 | -2.241016091 | 1.162244121  |
| RSM22     | YKL155C   | -1.096355554 | -1.012591307 | -1.192761359 | 1.207779784  |
| RPS27A    | YKL156W   | 1.033297126  | -7.865772186 | -8.818475195 | 1.121120086  |
| APE2      | YKL157W   | 1.161482968  | -1.811934772 | 1.331344291  | 1.360981367  |
| RCN1      | YKL159C   | -1.022769681 | -1.277432203 | 1.31902642   | -1.032560802 |
| YKL160W   | YKL160W   | -1.167230562 | -1.826947756 | -1.220721067 | -1.496613604 |
| YKL161C   | YKL161C   | -1.064912502 | -1.636226112 | 1.380301374  | 1.185412217  |
| YKL162C   | YKL162C   | -1.138010202 | 2.100974448  | 2.197246711  | -1.045822672 |
| YKL162C-A | YKL162C-A | 1.0824426    | 2.052091616  | 1.907741005  | 1.075665727  |
| PIR3      | YKL163W   | -1.041550367 | 7.666287261  | 8.323465535  | -1.085723148 |
| PIR1      | YKL164C   | 1.161347424  | -1.780250176 | 1.583455704  | 1.12428164   |
| MCD4      | YKL165C   | 1.194359902  | -1.409902134 | -1.477095583 | 1.047658237  |
| TPK3      | YKL166C   | -1.092074935 | -2.862571846 | -3.33074134  | 1.163548557  |
| MRP49     | YKL167C   | -1.098384559 | -1.117251557 | 1.098612779  | 1.016965739  |
| KKQ8      | YKL168C   | 1.103497153  | 2.513969152  | 2.359423177  | 1.065501592  |
| YKL169C   | YKL169C   | 1.190957125  | -1.099005374 | -1.228454136 | 1.350077697  |
| MRPL38    | YKL170W   | -1.275613739 | -1.216358345 | 1.087217436  | -1.322446001 |
| YKL171W   | YKL171W   | 1.008667551  | 2.383789634  | 2.615834248  | -1.09734274  |
| EBP2      | YKL172W   | -1.107801547 | -12.6094013  | -19.63925116 | 1.557508616  |
| SNU114    | YKL173W   | 1.051065805  | -1.317185212 | -1.503649171 | 1.141562445  |
| YKL174C   | YKL174C   | 1.193530302  | -1.347512635 | -1.736915083 | 1.288978699  |
| ZRT3      | YKL175W   | 1.278522834  | -1.307962643 | -1.664810436 | 1.272827206  |
| LST4      | YKL176C   | 1.229646063  | -1.964019875 | -2.357140336 | 1.200161143  |
| STE3      | YKL178C   | 2.494113009  | 3.340082883  | 1.350289691  | 2.473604668  |
| COY1      | YKL179C   | -1.178935425 | -1.013957541 | 1.119558075  | -1.104146899 |
| RPL17A    | YKL180W   | -1.040189738 | -8.873983182 | -6.25871266  | -1.417860776 |
| PRS1      | YKL181W   | -1.003074056 | -7.042529379 | -6.398895342 | -1.100585179 |

|         |         |              |              |              |              |
|---------|---------|--------------|--------------|--------------|--------------|
| FAS1    | YKL182W | 1.22440698   | -3.684621675 | -4.172483765 | 1.132404934  |
| LOT5    | YKL183W | -1.070297326 | -2.153196887 | -2.136187138 | -1.007962668 |
| SPE1    | YKL184W | 1.280280617  | -1.165693397 | -1.575259922 | 1.351350129  |
| ASH1    | YKL185W | 1.053998313  | -1.212475163 | 1.051556878  | 1.153028607  |
| MTR2    | YKL186C | -1.000054025 | -1.752865042 | -1.772269589 | 1.011070189  |
| YKL187C | YKL187C | 1.097771341  | 3.159297069  | 4.174141308  | -1.321224696 |
| PXA2    | YKL188C | 1.125301674  | 2.664865458  | 2.168514093  | 1.22889008   |
| HYM1    | YKL189W | -1.192113614 | -1.250856512 | 1.113512932  | 1.1233426    |
| CNB1    | YKL190W | -1.162742499 | -1.004943135 | -1.24338596  | 1.249532186  |
| DPH2    | YKL191W | 1.156536019  | -6.086015449 | -5.718664652 | -1.064237164 |
| ACP1    | YKL192C | 1.324557836  | -1.160264251 | 1.569682834  | -1.352866671 |
| SDS22   | YKL193C | -1.019362183 | 2.421800326  | 2.156997777  | 1.122764405  |
| MST1    | YKL194C | -1.03767509  | -1.422964055 | 1.336638437  | 1.06458412   |
| YKL195W | YKL195W | -1.296966703 | -1.782396204 | 2.180307943  | -1.223245392 |
| YKT6    | YKL196C | -1.3796443   | -1.572650685 | 1.058298325  | -1.664333586 |
| PEX1    | YKL197C | 1.18298443   | -1.439849111 | 1.336810004  | 1.077078348  |
| PTK1    | YKL198C | 1.285052149  | -1.081333526 | -1.465381351 | 1.355161304  |
| YKT9    | YKL199C | 1.332734265  | -1.009963533 | -1.21041401  | 1.22247401   |
| MNN4    | YKL201C | 1.384936407  | -1.993595786 | 1.171560022  | 1.701659111  |
| TOR2    | YKL203C | 1.095761958  | -1.009204508 | -1.191747189 | 1.202716636  |
| EAP1    | YKL204W | -1.01216838  | -1.215608191 | 1.26255751   | -1.038622082 |
| LOS1    | YKL205W | 1.054042679  | -2.906303787 | -3.364482151 | 1.157649853  |
| YKL206C | YKL206C | -1.037075931 | -1.381490149 | 1.272029997  | 1.086051549  |
| YKL207W | YKL207W | 1.071608644  | -1.394315106 | -1.182318783 | -1.179305553 |
| CBT1    | YKL208W | -1.399950978 | -1.182723787 | 1.5875325    | -1.342268175 |
| STE6    | YKL209C | -1.037496251 | -1.598988201 | -1.644490522 | 1.028456947  |
| UBA1    | YKL210W | 1.160067245  | -1.339851813 | 1.054902899  | 1.270118619  |
| TRP3    | YKL211C | 1.089633901  | -1.520096295 | -1.451253108 | -1.047437064 |
| SAC1    | YKL212W | 1.075240268  | -1.630869177 | -2.144030195 | 1.314654926  |
| DOA1    | YKL213C | -1.041851576 | -1.842087788 | 1.697103496  | 1.085430436  |
| YRA2    | YKL214C | -1.215258327 | -1.716560904 | -1.533495908 | -1.119377558 |
| YKL215C | YKL215C | 1.013513736  | -1.65240596  | 1.490985115  | 1.108264559  |
| URA1    | YKL216W | 1.038737538  | -16.91137315 | -13.90106783 | -1.216552092 |
| JEN1    | YKL217W | 1.867467563  | 3.868113812  | 5.167906737  | -1.33602758  |
| SRY1    | YKL218C | -1.387415766 | 2.02102946   | 2.376076158  | -1.175676161 |
| COS9    | YKL219W | 1.215951315  | -1.433515607 | 1.049805135  | 1.365506378  |
| FRE2    | YKL220C | 1.141940581  | -1.739709078 | 1.181095281  | 1.472962517  |
| MCH2    | YKL221W | -1.125112109 | 4.714688546  | 3.859699998  | 1.22151684   |
| YKL222C | YKL222C | -1.004654925 | -1.039128291 | 1.039324179  | -1.000188513 |
| YKL224C | YKL224C | 1.026822122  | -1.043676917 | 1.290276691  | -1.2362798   |
| YKL225W | YKL225W | 1.421456108  | -1.209994382 | -1.383429759 | 1.143335689  |
| VPS1    | YKR001C | -1.086425129 | -1.086179923 | 1.05694649   | 1.027658384  |
| PAP1    | YKR002W | -1.09618233  | -1.14056036  | 1.36406528   | -1.195960624 |
| OSH6    | YKR003W | -1.29982672  | -1.272030097 | 1.263719901  | 1.00657598   |
| ECM9    | YKR004C | 1.149531803  | -1.194359249 | -1.084709123 | 1.295532374  |
| YKR005C | YKR005C | 1.132186128  | -1.107472727 | -1.485074679 | 1.340958239  |
| MRPL13  | YKR006C | -1.32679615  | -1.065751815 | 1.234712206  | -1.315896775 |
| YKR007W | YKR007W | -1.16879557  | -1.060967292 | 1.070375851  | -1.135633768 |
| RSC4    | YKR008W | -1.253335154 | -1.090871091 | -1.062690052 | -1.026518588 |

|         |           |              |              |              |              |
|---------|-----------|--------------|--------------|--------------|--------------|
| FOX2    | YKR009C   | -1.060340038 | -1.423546624 | 1.647890563  | -1.157595077 |
| TOF2    | YKR010C   | -1.100875079 | -1.384043148 | -1.404298186 | 1.014634687  |
| YKR011C | YKR011C   | -1.098025921 | 4.225005128  | 4.226846527  | -1.000435834 |
| YKR012C | YKR012C   | 1.212967815  | -1.595599444 | 1.18945487   | 1.341454379  |
| PRY2    | YKR013W   | 1.319676831  | -3.99132911  | -5.207628454 | 1.304735418  |
| YPT52   | YKR014C   | -1.136207558 | -1.438683173 | 1.49362918   | -1.038191874 |
| YKR016W | YKR016W   | -1.210919945 | 2.07475271   | 2.143696976  | -1.033230112 |
| YKR017C | YKR017C   | 1.167234069  | -1.595515768 | 1.114769493  | 1.431251731  |
| YKR018C | YKR018C   | 1.314327365  | -1.63372808  | 1.017713945  | 1.605292023  |
| IRS4    | YKR019C   | -1.061787951 | -1.141878512 | -1.166088835 | 1.021202188  |
| VPS67   | YKR020W   | -1.251386599 | -1.007868991 | 1.307431302  | -1.297223462 |
| YKR021W | YKR021W   | 1.016210278  | -1.302647459 | 1.292110877  | 1.008154549  |
| YKR022C | YKR022C   | 1.090799053  | -1.028241371 | -1.405952979 | 1.445659018  |
| YKR023W | YKR023W   | -1.223691744 | -1.147568993 | 1.195790001  | -1.042020137 |
| DBP7    | YKR024C   | 1.049607036  | -7.096103939 | -11.06602525 | 1.55945084   |
| RPC37   | YKR025W   | -1.168184982 | -4.306185007 | -3.033661085 | -1.419468057 |
| GCN3    | YKR026C   | -1.082308394 | -3.352247533 | -2.79804743  | -1.19806673  |
| YKR027W | YKR027W   | 1.135115021  | -1.088258878 | -1.451651549 | 1.333921163  |
| SAP190  | YKR028W   | 1.122781729  | -1.162936904 | -1.286071125 | 1.105882117  |
| SET3    | YKR029C   | 1.018240514  | -1.254358429 | 1.045731594  | 1.199503233  |
| MSG1    | YKR030W   | 1.161171424  | -1.027434123 | -1.179259172 | 1.147771079  |
| SPO14   | YKR031C   | 1.121414949  | -1.40985302  | 1.213482098  | 1.161824326  |
| DID2    | YKR035W-A | -1.051127901 | -1.22822848  | 1.099460786  | 1.117118951  |
| CAF4    | YKR036C   | -1.066610006 | -1.506941495 | -1.537893798 | 1.020539817  |
| SPC34   | YKR037C   | -1.111809505 | -1.068413184 | 1.08467729   | -1.015222675 |
| KAE1    | YKR038C   | -1.077903059 | -1.312597605 | -1.243659323 | -1.055431806 |
| GAP1    | YKR039W   | 1.265623714  | -1.441364573 | 1.096373401  | 1.314665763  |
| YKR040C | YKR040C   | 1.076492524  | -1.714455053 | -1.038942624 | -1.650192237 |
| YKR041W | YKR041W   | 1.042870193  | -1.256798159 | -1.255276804 | -1.001211968 |
| UTH1    | YKR042W   | -1.056830242 | -1.120523948 | 1.014734074  | -1.137033831 |
| YKR043C | YKR043C   | -1.019560692 | -4.406574023 | -3.736774318 | -1.179245426 |
| UIP5    | YKR044W   | 1.037484511  | -4.529783225 | -5.65206364  | 1.247755877  |
| YKR045C | YKR045C   | -1.187574797 | -1.387615016 | -1.061193168 | -1.307598897 |
| YKR046C | YKR046C   | 1.149880187  | 3.578397223  | 3.857801413  | -1.07808082  |
| YKR047W | YKR047W   | 1.204119745  | -1.507739429 | -1.477568111 | -1.020419579 |
| NAP1    | YKR048C   | -1.01416634  | -1.081649542 | 1.102827641  | -1.019579446 |
| YKR049C | YKR049C   | 1.05929041   | 3.322500656  | 4.075615406  | -1.226671062 |
| TRK2    | YKR050W   | 1.231295416  | -1.133972344 | 1.002193551  | 1.131490361  |
| YKR051W | YKR051W   | 1.262119919  | -1.296005429 | -1.002594321 | 1.299367683  |
| MRS4    | YKR052C   | 1.112414381  | -1.817246811 | 2.012139527  | -1.107246146 |
| YSR3    | YKR053C   | 1.037275909  | -2.539243446 | -2.041958323 | -1.243533434 |
| DYN1    | YKR054C   | 1.162726388  | -1.182208309 | -1.034685123 | 1.223213348  |
| RHO4    | YKR055W   | 1.192133323  | -1.190610306 | 1.104627886  | 1.077838357  |
| TRM2    | YKR056W   | -1.162611985 | -8.677146506 | -8.521564083 | -1.018257496 |
| RPS21A  | YKR057W   | 1.05848001   | -10.36492889 | -5.93145356  | -1.747451747 |
| GLG1    | YKR058W   | -1.062643337 | 5.802483962  | 5.742578814  | 1.01043175   |
| TIF1    | YKR059W   | 1.139338437  | -2.905013159 | -2.838686566 | -1.02336524  |
| YKR060W | YKR060W   | -1.118179177 | -5.15150228  | -8.242499858 | 1.600018677  |
| KTR2    | YKR061W   | 1.020228338  | -1.104682738 | -1.184276856 | 1.072051562  |

|         |         |              |              |              |              |
|---------|---------|--------------|--------------|--------------|--------------|
| TFA2    | YKR062W | -1.233052769 | -1.06048775  | 1.233693991  | -1.163326961 |
| LAS1    | YKR063C | -1.149161724 | -2.673600516 | -2.789910285 | 1.043503047  |
| YKR064W | YKR064W | -1.025264336 | -1.03212253  | -1.252637105 | 1.292874977  |
| YKR065C | YKR065C | 1.147912097  | -1.22372504  | 1.025098397  | 1.193763491  |
| CCP1    | YKR066C | 1.17488971   | 3.311747781  | 3.70139003   | -1.117654566 |
| GPT2    | YKR067W | 1.188008861  | 4.318766439  | 3.240029876  | 1.332940313  |
| BET3    | YKR068C | -1.02500022  | -1.662758189 | -1.078951707 | -1.54108676  |
| MET1    | YKR069W | 1.005073807  | -1.163443215 | -1.194239101 | 1.026469609  |
| YKR070W | YKR070W | -1.131212477 | -1.02899983  | 1.254907719  | -1.21954123  |
| DRE2    | YKR071C | -1.139915467 | -1.586275396 | -1.460360491 | -1.086221797 |
| SIS2    | YKR072C | 1.002171188  | -1.209901235 | -1.235286557 | 1.020981318  |
| YKR074W | YKR074W | -1.020253042 | -1.231260008 | 1.185305769  | -1.459419591 |
| YKR075C | YKR075C | 1.053585449  | -1.529687716 | -1.880281079 | 1.229192768  |
| ECM4    | YKR076W | -1.14823584  | 3.255251816  | 3.001855334  | 1.084413289  |
| YKR077W | YKR077W | 1.09792241   | -1.076044027 | -1.061142155 | -1.014043239 |
| YKR078W | YKR078W | -1.077448225 | -1.013079598 | 1.063596067  | -1.077507475 |
| YKR079C | YKR079C | -1.022349492 | -6.022179315 | -7.851048422 | 1.303688916  |
| MTD1    | YKR080W | -1.143999846 | -1.403880727 | -1.284131336 | -1.093253227 |
| RPF2    | YKR081C | -1.097493521 | -30.17755456 | -43.77391616 | 1.450545507  |
| NUP133  | YKR082W | 1.053454573  | -1.886681901 | -2.279692323 | 1.208307729  |
| DAD2    | YKR083C | 1.220683126  | -1.318797646 | -1.660047359 | 1.258758207  |
| HBS1    | YKR084C | -1.061259564 | -1.081675362 | -1.030163463 | 1.114302437  |
| MRPL20  | YKR085C | -1.22914229  | -2.041871802 | -1.394650173 | -1.464074534 |
| PRP16   | YKR086W | -1.082300178 | -2.09163445  | -2.176561777 | 1.040603332  |
| YKR087C | YKR087C | 1.087913436  | -1.133864643 | 1.197744553  | -1.056338214 |
| YKR088C | YKR088C | 1.108555745  | -1.041397142 | 1.092917775  | -1.138161448 |
| YKR089C | YKR089C | 1.011001262  | -1.984218801 | 1.964550866  | 1.010011415  |
| PXL1    | YKR090W | 1.014996281  | -1.015428202 | -1.008178385 | -1.007191006 |
| SRL3    | YKR091W | 1.046109052  | 5.494452056  | 6.539332773  | -1.19017014  |
| SRP40   | YKR092C | 1.11813062   | -9.596349821 | -12.57461539 | 1.310354001  |
| PTR2    | YKR093W | 1.19915642   | -1.125183325 | -1.316781681 | 1.170281902  |
| RPL40B  | YKR094C | -1.03800571  | -4.242154423 | -3.198456233 | -1.326313107 |
| MLP1    | YKR095W | 1.02832732   | -1.263657412 | -1.244717071 | -1.015216584 |
| YKR096W | YKR096W | -1.031513609 | -1.646968653 | 1.558639954  | 1.056670367  |
| PCK1    | YKR097W | 1.475493042  | -1.996218325 | 2.707429045  | -1.356279026 |
| UBP11   | YKR098C | -1.112420401 | -1.618272974 | 1.751372457  | -1.082247856 |
| BAS1    | YKR099W | -1.058292095 | -5.857135783 | -6.093005911 | 1.040270558  |
| YKR100C | YKR100C | 1.100600467  | -1.499210457 | 1.22792171   | 1.22093326   |
| SIR1    | YKR101W | -1.149258148 | -1.643323115 | 1.770157517  | -1.077181658 |
| FLO10   | YKR102W | 1.172620302  | -1.035328022 | -1.349606744 | 1.397285681  |
| YKR104W | YKR104W | 1.150713677  | -1.009727251 | -1.247714559 | 1.235694648  |
| YKR106W | YKR106W | 1.435413125  | -1.620971878 | 1.282228487  | 1.26418333   |
| DNM1    | YLL001W | -1.128325752 | -1.420923549 | 1.624827961  | -1.143501325 |
| RTT109  | YLL002W | -1.129914459 | -1.776372324 | -1.799716852 | 1.013141686  |
| SFI1    | YLL003W | -1.104601055 | -1.056121759 | -1.002506893 | -1.053480795 |
| ORC3    | YLL004W | -1.165377307 | -1.661633292 | -1.895085263 | 1.140495482  |
| MMM1    | YLL006W | 1.255014198  | 2.880492333  | 2.082839865  | 1.382963895  |
| YLL007C | YLL007C | -1.055116634 | -1.225755872 | -1.412319074 | 1.152202576  |
| DRS1    | YLL008W | 1.016110706  | -43.18351049 | -33.96677239 | -1.271345714 |

|         |           |              |              |              |              |
|---------|-----------|--------------|--------------|--------------|--------------|
| COX17   | YLL009C   | -1.313816262 | -1.259356046 | 1.591794854  | -1.263975235 |
| PSR1    | YLL010C   | 1.159696048  | -1.151790187 | 1.122382432  | 1.02620119   |
| SOF1    | YLL011W   | -1.124560988 | -9.505370109 | -14.90546279 | 1.568109671  |
| YLL012W | YLL012W   | 1.077293362  | -3.184424334 | -3.9183431   | 1.23047141   |
| PUF3    | YLL013C   | 1.15837363   | -1.040997325 | -1.194153153 | 1.243110238  |
| YLL014W | YLL014W   | 1.397544202  | -1.750585563 | -1.688213205 | -1.036945783 |
| BPT1    | YLL015W   | 1.118994665  | -1.159818323 | 1.119246675  | 1.036249068  |
| SDC25   | YLL016W   | 1.15332945   | -1.357951032 | 1.077183617  | 1.260649541  |
| DPS1    | YLL018C   | 1.077390021  | -1.229069186 | -1.323023015 | 1.076443076  |
| COX19   | YLL018C-A | 1.139697389  | -1.72315747  | 1.917779176  | -1.112944817 |
| KNS1    | YLL019C   | 1.167950342  | 2.967798981  | 2.83426649   | 1.047113598  |
| YLL020C | YLL020C   | 1.080213281  | 3.381919788  | 4.24964988   | -1.256579146 |
| SPA2    | YLL021W   | 1.014835335  | -2.220024261 | -1.947952843 | -1.139670433 |
| HIF1    | YLL022C   | -1.117628761 | -3.131404025 | -2.451138814 | -1.277530267 |
| YLL023C | YLL023C   | 1.160767429  | 2.88300037   | 2.629889628  | 1.096243865  |
| SSA2    | YLL024C   | 1.193353647  | 2.287781508  | 3.351804358  | -1.465089366 |
| YLL025W | YLL025W   | 1.297134373  | -1.116413102 | 1.122190097  | -1.005174603 |
| HSP104  | YLL026W   | 1.073496666  | 39.62927915  | 54.11495824  | -1.365529714 |
| ISA1    | YLL027W   | -1.174317727 | -1.215132715 | -1.327718569 | 1.092653133  |
| TPO1    | YLL028W   | 1.34067366   | 2.133981242  | 1.762087302  | 1.211053073  |
| YLL029W | YLL029W   | -1.161851743 | 2.25431747   | 3.056340742  | -1.355772105 |
| GPI13   | YLL031C   | 1.225881296  | -1.190876061 | -1.407249935 | 1.181693025  |
| YLL032C | YLL032C   | -1.124333127 | -1.056034903 | 1.096937619  | -1.158404411 |
| YLL033W | YLL033W   | 1.110712956  | -1.231716308 | -1.774094262 | 1.440343243  |
| YLL034C | YLL034C   | 1.055233202  | -19.2208673  | -18.41931871 | -1.043516734 |
| GRC3    | YLL035W   | 1.179731855  | -2.887404115 | -3.002542801 | 1.039876194  |
| PRP19   | YLL036C   | -1.057199238 | -1.32055282  | -1.176387637 | -1.122549045 |
| ENT4    | YLL038C   | 1.160581009  | -1.451349314 | -1.363133151 | -1.064715734 |
| UBI4    | YLL039C   | -1.223135638 | 19.57528661  | 53.08515751  | -2.711845736 |
| VPS13   | YLL040C   | -1.04386709  | -1.998713484 | 2.118464923  | -1.059914259 |
| SDH2    | YLL041C   | 1.278865024  | 3.341544841  | 2.515394982  | 1.328437428  |
| APG10   | YLL042C   | 1.250134182  | -1.270863033 | -1.57164018  | 1.236671569  |
| FPS1    | YLL043W   | 1.043755762  | -1.173206719 | -1.188560179 | 1.013086748  |
| YLL044W | YLL044W   | 1.161312832  | -5.778719148 | -4.905565208 | -1.177992525 |
| RPL8B   | YLL045C   | -1.151811371 | -8.223241226 | -5.703320999 | -1.441833841 |
| YBT1    | YLL048C   | 1.192412267  | -1.495704679 | -1.936146438 | 1.294471071  |
| YLL049W | YLL049W   | 1.25943955   | -1.182847302 | -1.083910264 | -1.091277887 |
| COF1    | YLL050C   | 1.585752425  | -1.062887621 | -1.558859596 | 1.466626919  |
| FRE6    | YLL051C   | 1.167417093  | -1.400115518 | -1.296582786 | -1.07985046  |
| AQY2    | YLL052C   | 1.355254709  | -1.197619874 | -1.101128473 | 1.318733343  |
| YLL053C | YLL053C   | 1.172211382  | -1.069990706 | 1.017933594  | 1.051139988  |
| YLL054C | YLL054C   | 1.051233088  | -2.444649246 | -2.256843215 | -1.08321625  |
| YLL055W | YLL055W   | 1.346440952  | 2.065038028  | 1.657382452  | 1.245963492  |
| YLL056C | YLL056C   | -1.159644597 | -1.090345727 | 1.401207795  | -1.285104128 |
| YLL057C | YLL057C   | 1.154874578  | -1.672476023 | 1.746682095  | -1.04436899  |
| YLL058W | YLL058W   | 1.006202363  | -1.599150378 | 1.86501285   | -1.166252327 |
| GTT2    | YLL060C   | 1.001345063  | -1.297472572 | 1.319494008  | -1.712007284 |
| MMP1    | YLL061W   | 1.083876126  | -3.944077407 | -3.692086596 | -1.068251598 |
| MHT1    | YLL062C   | -1.214762232 | -4.15217545  | -3.349398411 | -1.239677978 |

|         |         |              |              |              |              |
|---------|---------|--------------|--------------|--------------|--------------|
| AYT1    | YLL063C | 1.16557483   | -1.051107463 | -1.123152287 | 1.068541826  |
| YLL064C | YLL064C | 1.087468817  | -1.237937602 | 1.012488314  | -1.253397355 |
| YLL065W | YLL065W | 1.559597853  | -1.259629668 | -1.206289474 | -1.044218403 |
| YLL066C | YLL066C | -1.082549038 | -1.057369066 | 1.280542974  | -1.354006529 |
| YLL067C | YLL067C | -1.172082512 | -1.107867557 | 1.319986269  | -1.462369964 |
| YLR001C | YLR001C | 1.083060028  | 2.028192768  | 2.328595331  | -1.148113417 |
| NOC3    | YLR002C | -1.04190466  | -15.48830284 | -15.452767   | -1.002299643 |
| YLR003C | YLR003C | -1.249283097 | -8.72813544  | -8.51181949  | -1.025413596 |
| YLR004C | YLR004C | -1.011463951 | -1.079965644 | 1.035470369  | -1.118272425 |
| SSL1    | YLR005W | -1.168306784 | -1.076241029 | 1.145574501  | -1.064421882 |
| SSK1    | YLR006C | 1.081350045  | -1.954610437 | 2.238646952  | -1.145316177 |
| NSE1    | YLR007W | -1.331870395 | -2.000651646 | -1.435369751 | -1.393823191 |
| YLR008C | YLR008C | 1.009257981  | -2.407329978 | -2.765239474 | 1.14867488   |
| RLP24   | YLR009W | -1.053012029 | -8.501089739 | -11.60572304 | 1.365204156  |
| TEN1    | YLR010C | -1.14984717  | -1.016515912 | 1.130534648  | -1.149206458 |
| LOT6    | YLR011W | -1.469188855 | -1.263425676 | 1.191301212  | -1.505120539 |
| PPR1    | YLR014C | -1.110557446 | -1.926251908 | -2.213131858 | 1.148931689  |
| BRE2    | YLR015W | -1.208092088 | -1.885785834 | -1.784607734 | -1.056694868 |
| YLR016C | YLR016C | -1.13617997  | -1.05475498  | -1.022654116 | -1.031389756 |
| MEU1    | YLR017W | 1.191274183  | -4.165202711 | -4.261206116 | 1.023048932  |
| POM34   | YLR018C | -1.389799264 | -1.545092332 | -1.24678822  | -1.239258045 |
| PSR2    | YLR019W | 1.44926819   | -1.357961564 | -1.160442505 | 1.575836318  |
| YLR020C | YLR020C | -1.076608582 | -1.500237924 | -1.91481603  | 1.276341572  |
| YLR021W | YLR021W | -1.452475835 | -1.656419117 | 1.009306821  | -1.671835113 |
| YLR022C | YLR022C | -1.040178497 | -1.592253754 | -1.610726716 | 1.011601769  |
| YLR023C | YLR023C | 1.230033695  | -1.191186344 | -1.024501772 | 1.22037252   |
| UBR2    | YLR024C | 1.126696134  | -1.459696724 | 1.197129318  | 1.219330863  |
| SNF7    | YLR025W | -1.18286756  | -1.548350376 | 2.080389508  | -1.343616755 |
| SED5    | YLR026C | -1.023770443 | -1.165754142 | -1.220262174 | 1.046757742  |
| AAT2    | YLR027C | 1.037967494  | -1.222507559 | -1.082311532 | -1.129533894 |
| ADE16   | YLR028C | -1.030098526 | -1.73236229  | 1.758665783  | -1.015183598 |
| RPL15A  | YLR029C | -1.391275016 | -6.676729381 | -3.49114288  | -1.91247669  |
| YLR030W | YLR030W | 1.315509328  | -1.671469342 | 1.551782278  | 1.077128773  |
| YLR031W | YLR031W | -1.034554813 | 2.924287459  | 3.687477287  | -1.260983176 |
| RAD5    | YLR032W | 1.167046467  | -1.197413571 | -1.615558963 | 1.34920716   |
| RSC58   | YLR033W | -1.035344478 | -1.137504713 | -1.459695551 | 1.283243519  |
| SMF3    | YLR034C | 1.149272849  | -1.195938038 | 1.22713004   | -1.02608162  |
| MLH2    | YLR035C | 1.002540073  | -1.437786581 | 1.51057221   | -1.050623389 |
| YLR036C | YLR036C | -1.018459002 | -1.466250548 | -1.269459036 | -1.155019977 |
| DAN2    | YLR037C | 1.094212489  | -1.610074937 | 1.881577017  | -1.168626983 |
| COX12   | YLR038C | 1.175369414  | -1.047310667 | -1.158680135 | 1.213498065  |
| RIC1    | YLR039C | -1.022211594 | -1.003455097 | -1.107079887 | 1.110904955  |
| YLR040C | YLR040C | 1.47915477   | -1.086898736 | -1.441459901 | 1.326213614  |
| YLR042C | YLR042C | 1.152583709  | -2.116985208 | -2.040973699 | -1.037242768 |
| TRX1    | YLR043C | 1.346074334  | -1.769760939 | -1.724540961 | -1.026221457 |
| STU2    | YLR045C | 1.004205834  | -1.127559654 | -1.032340499 | -1.09223619  |
| YLR046C | YLR046C | 1.226698795  | -1.343800146 | 1.253678423  | 1.071885837  |
| YLR047C | YLR047C | 1.315964391  | -1.984195099 | 1.816181144  | 1.09250947   |
| RPSOB   | YLR048W | -1.219392299 | -14.90671598 | -10.10908846 | -1.47458557  |

|         |         |              |              |              |              |
|---------|---------|--------------|--------------|--------------|--------------|
| YLR049C | YLR049C | -1.185041456 | -1.167894064 | 1.064796568  | 1.096823655  |
| YLR050C | YLR050C | 1.010162884  | -1.196291731 | 1.054154654  | -1.261076497 |
| YLR051C | YLR051C | -1.141812768 | -4.116364445 | -3.570308451 | -1.152943647 |
| IES3    | YLR052W | -1.115380337 | -1.596144092 | -1.5777119   | -1.011682863 |
| YLR054C | YLR054C | 1.144179554  | -1.988314766 | 2.188630791  | -1.100746637 |
| SPT8    | YLR055C | 1.025132051  | -1.249625679 | -1.13986129  | -1.096296268 |
| ERG3    | YLR056W | 1.120059335  | -6.544126948 | -6.746700294 | 1.030954984  |
| YLR057W | YLR057W | 1.013077958  | -1.917173449 | -2.434095474 | 1.269627157  |
| SHM2    | YLR058C | 1.040667389  | -1.286072148 | -1.562658554 | 1.2150629    |
| REX2    | YLR059C | 1.192701132  | -1.69883622  | -1.979207036 | 1.16503699   |
| FRS1    | YLR060W | -1.064812428 | -2.321764627 | -2.029267043 | -1.144139523 |
| RPL22A  | YLR061W | 1.071489882  | -8.544758158 | -8.976359077 | 1.050510606  |
| BUD28   | YLR062C | 1.137309446  | -6.443912034 | -3.943085598 | -1.634230826 |
| YLR063W | YLR063W | 1.148995554  | -3.496469727 | -5.435590588 | 1.554593923  |
| YLR064W | YLR064W | 1.019317542  | 2.987850729  | 4.007745949  | -1.341347447 |
| YLR065C | YLR065C | 1.08680899   | -2.624602403 | -2.845041202 | 1.083989407  |
| SPC3    | YLR066W | -1.172331845 | -1.798762901 | -1.685257276 | -1.067352105 |
| PET309  | YLR067C | 1.102764885  | -1.253519331 | -1.642575073 | 1.310370756  |
| FVY7    | YLR068W | -1.014968414 | -11.60551764 | -15.14123645 | 1.304658432  |
| MEF1    | YLR069C | -1.077128067 | -1.55122434  | 1.200749074  | 1.29188052   |
| XYL2    | YLR070C | -1.039511595 | 4.072483346  | 3.767726429  | 1.080886158  |
| RGR1    | YLR071C | -1.060618978 | -1.323460367 | -1.472993177 | 1.112986239  |
| YLR072W | YLR072W | -1.324207503 | -1.039748035 | 1.498473585  | -1.441189147 |
| YLR073C | YLR073C | 1.142272766  | -3.473010905 | -4.356474956 | 1.254379866  |
| BUD20   | YLR074C | -1.12527908  | -5.173298091 | -4.429789779 | -1.167842798 |
| RPL10   | YLR075W | -1.155319399 | -4.891993744 | -3.647821158 | -1.341072803 |
| YLR076C | YLR076C | 1.044722716  | -3.479496735 | -2.194864583 | -1.585289936 |
| YLR077W | YLR077W | -1.067644374 | -1.311731932 | -1.072419656 | 1.406727107  |
| BOS1    | YLR078C | -1.149330732 | -1.108108849 | 1.001536059  | -1.109810971 |
| SIC1    | YLR079W | -1.240463748 | -1.381201273 | 2.051893663  | -1.485586282 |
| EMP46   | YLR080W | -1.089706941 | 5.258493551  | 5.332538732  | -1.014081064 |
| GAL2    | YLR081W | 1.302174857  | 2.043366886  | 2.795961352  | -1.368310983 |
| SRL2    | YLR082C | 1.046892819  | -1.374161041 | 1.364845499  | 1.006825345  |
| EMP70   | YLR083C | 1.142152765  | -4.275577702 | -5.700197484 | 1.333199366  |
| RAX2    | YLR084C | 1.256487974  | -1.693521456 | -2.111841972 | 1.247012233  |
| ARP6    | YLR085C | -1.072039636 | -1.095264702 | -1.07103778  | 1.173069875  |
| SMC4    | YLR086W | 1.057709048  | -1.198981679 | 1.168310439  | 1.026252647  |
| CSF1    | YLR087C | 1.069085298  | -1.039227672 | 1.047339849  | -1.088424554 |
| GAA1    | YLR088W | 1.196543897  | -1.15989915  | -1.42148193  | 1.225522003  |
| YLR089C | YLR089C | 1.185622169  | -1.750101657 | 1.748713216  | 1.000793979  |
| XDJ1    | YLR090W | -1.132717148 | -1.257506294 | 1.343550976  | -1.068424853 |
| YLR091W | YLR091W | 1.216936388  | -1.009052674 | -1.273851164 | 1.262422862  |
| SUL2    | YLR092W | 1.124904205  | -1.311374693 | 1.271674402  | 1.031218912  |
| NVV1    | YLR093C | -1.260499613 | -1.40612284  | 1.473595174  | -1.047984665 |
| GIS3    | YLR094C | -1.101449791 | -1.004123767 | -1.10394704  | 1.10849946   |
| IOC2    | YLR095C | -1.047494956 | -1.096423733 | 1.209131712  | -1.102796004 |
| KIN2    | YLR096W | 1.107551195  | -1.187047932 | -1.244423544 | 1.048334705  |
| YLR097C | YLR097C | -1.129054458 | -1.338649423 | 1.270092835  | 1.053977619  |
| CHA4    | YLR098C | -1.02700824  | -1.456854739 | 1.438572122  | 1.012708863  |



|           |           |              |              |              |              |
|-----------|-----------|--------------|--------------|--------------|--------------|
| ICT1      | YLR099C   | -1.004109422 | -1.049013643 | 1.170386706  | -1.227751622 |
| YLR099W-A | YLR099W-A | -1.049685892 | -1.377308343 | -1.154044342 | -1.193462238 |
| ERG27     | YLR100W   | -1.140951503 | -1.971361575 | -1.622505273 | -1.215010889 |
| YLR101C   | YLR101C   | -1.016777606 | -1.155063279 | -1.229895098 | 1.064785905  |
| APC9      | YLR102C   | -1.105372139 | 2.473363032  | 3.25433948   | -1.315754879 |
| CDC45     | YLR103C   | -1.078278719 | -2.732843304 | -2.661635332 | -1.026753467 |
| YLR104W   | YLR104W   | -1.086891296 | -1.337371269 | 1.527042673  | -2.042222999 |
| SEN2      | YLR105C   | -1.163961387 | -2.019890581 | -2.008027997 | -1.005907579 |
| MDN1      | YLR106C   | 1.151308702  | -3.526211463 | -3.14662147  | -1.120634146 |
| REX3      | YLR107W   | -1.182148653 | -1.410498333 | -1.663157251 | 1.179127413  |
| YLR108C   | YLR108C   | 1.100730277  | -1.271644728 | -1.372786785 | 1.07953641   |
| CCW12     | YLR110C   | 1.088856947  | -2.13712851  | -1.145560185 | -1.86557506  |
| YLR111W   | YLR111W   | 1.678957609  | 2.274027156  | 1.819933372  | 1.249511214  |
| YLR112W   | YLR112W   | 1.130360752  | -1.867302618 | 2.366841766  | -1.267519117 |
| HOG1      | YLR113W   | -1.069244741 | -1.031268326 | 1.233353681  | -1.271918586 |
| YLR114C   | YLR114C   | -1.043388603 | -1.385884412 | -1.578676537 | 1.139111258  |
| CFT2      | YLR115W   | -1.1467944   | -1.27130584  | 1.43035325   | -1.125105546 |
| MSL5      | YLR116W   | 1.179624338  | -1.31206028  | 1.208801067  | 1.085422834  |
| CLF1      | YLR117C   | 1.040181742  | -1.177679431 | 1.032974472  | 1.140085707  |
| YLR118C   | YLR118C   | 1.032007356  | -1.634005664 | 1.730223043  | -1.05888436  |
| SRN2      | YLR119W   | -1.097268846 | -1.37743232  | 1.468324894  | -1.065986961 |
| YPS1      | YLR120C   | 1.062161347  | 2.057757753  | 2.515872156  | -1.222627956 |
| YPS3      | YLR121C   | 1.089326244  | -2.056743609 | -1.860937735 | -1.105218928 |
| YLR122C   | YLR122C   | 1.303645309  | -1.366830233 | -1.564522199 | 1.144635348  |
| YLR123C   | YLR123C   | 1.183497233  | -1.266450171 | -1.591599544 | 1.256740755  |
| YLR125W   | YLR125W   | 1.414835135  | -1.267684557 | -1.068825191 | 1.354933189  |
| YLR126C   | YLR126C   | -1.044969546 | -1.84318349  | -1.553222056 | -1.186683825 |
| APC2      | YLR127C   | 1.025227149  | -1.165907949 | -1.052314501 | 1.226901841  |
| YLR128W   | YLR128W   | -1.060795356 | -1.531695916 | 1.475577714  | 1.038031342  |
| DIP2      | YLR129W   | 1.05118334   | -19.03449224 | -28.87039647 | 1.516741089  |
| ZRT2      | YLR130C   | 1.205355387  | -1.909768677 | -2.271116058 | 1.189210026  |
| ACE2      | YLR131C   | 1.102713368  | -1.227472179 | 1.107079356  | 1.108748142  |
| YLR132C   | YLR132C   | -1.098173481 | 2.488840721  | 3.094744851  | -1.243448334 |
| CKI1      | YLR133W   | 1.066410474  | 3.123639515  | 3.140290053  | -1.005330493 |
| PDC5      | YLR134W   | 1.364636901  | -1.310611611 | -1.377733775 | 1.051214382  |
| SLX4      | YLR135W   | 1.161862564  | -1.245700421 | 1.003566023  | 1.241274011  |
| TIS11     | YLR136C   | -1.098636407 | -1.252397342 | -1.006038682 | -1.244879907 |
| YLR137W   | YLR137W   | -1.123054155 | -1.502982771 | 2.369502912  | -1.576533649 |
| NHA1      | YLR138W   | 1.163283414  | -1.172531886 | -1.068162408 | -1.097709372 |
| SLS1      | YLR139C   | 1.277739855  | -1.121123273 | -1.478129833 | 1.657165756  |
| YLR140W   | YLR140W   | 1.020491319  | -1.171703406 | 1.10319252   | 1.062102385  |
| RRN5      | YLR141W   | 1.119034165  | -1.007374586 | 1.094925711  | -1.086910199 |
| PUT1      | YLR142W   | 1.10146764   | 3.491406352  | 3.191792611  | 1.093870053  |
| YLR143W   | YLR143W   | -1.061141681 | -1.448396689 | -1.455572008 | 1.004953974  |
| ACF2      | YLR144C   | 1.263268855  | 2.133873377  | 1.719319176  | 1.241115325  |
| YLR145W   | YLR145W   | -1.082408559 | -1.03469624  | 1.084613683  | -1.048243573 |
| SPE4      | YLR146C   | 1.267783839  | -5.065628969 | -5.267809006 | 1.039912129  |
| SMD3      | YLR147C   | -1.131158032 | -2.246465666 | -1.329185584 | -1.690106854 |
| PEP3      | YLR148W   | -1.061406885 | -1.389087165 | 1.350683293  | 1.028432922  |

|           |           |              |              |              |              |
|-----------|-----------|--------------|--------------|--------------|--------------|
| YLR149C   | YLR149C   | 1.194098805  | 16.76101422  | 16.23792098  | 1.032214299  |
| YLR149C-A | YLR149C-A | 1.533895126  | -1.818261768 | -3.019654747 | 1.660737084  |
| STM1      | YLR150W   | -1.37239165  | -3.496440932 | -2.242977652 | -1.558838952 |
| PCD1      | YLR151C   | -1.282182265 | 3.764665099  | 3.415462254  | 1.102241752  |
| YLR152C   | YLR152C   | 1.225088818  | 3.895061123  | 3.953458381  | -1.014992642 |
| ACS2      | YLR153C   | 1.110189138  | -1.567299863 | -1.769411973 | 1.128955611  |
| YLR154C   | YLR154C   | -1.215999859 | -1.842143273 | -1.212413087 | -1.519402333 |
| ASP3-1    | YLR155C   | 1.073982467  | -1.012596958 | 1.533862826  | -1.553184832 |
| YLR156W   | YLR156W   | 1.220535863  | -1.030696679 | -1.066286613 | 1.034529978  |
| ASP3-2    | YLR157C   | 1.046493168  | -1.004072553 | 1.475948351  | -1.469961853 |
| ASP3-3    | YLR158C   | 1.073380359  | -1.008378624 | 1.565154883  | -1.578268726 |
| YLR159W   | YLR159W   | 1.30497332   | -1.060566332 | -1.089318261 | 1.027109977  |
| ASP3-4    | YLR160C   | 1.059264002  | -1.007197303 | 1.573583375  | -1.584908932 |
| YLR161W   | YLR161W   | 1.207582654  | -1.049400256 | -1.071486164 | 1.021046219  |
| YLR162W   | YLR162W   | 1.694919404  | -1.080253084 | 1.046259722  | -1.130225292 |
| MAS1      | YLR163C   | -1.208418054 | -1.290568174 | 1.600718162  | -1.240320499 |
| YLR164W   | YLR164W   | 1.085747071  | 2.463230582  | 2.515688704  | -1.021296473 |
| PUS5      | YLR165C   | -1.108478856 | -1.138095595 | 1.235896882  | -1.085934158 |
| SEC10     | YLR166C   | 1.077100919  | -1.297938269 | 1.033485882  | 1.255883889  |
| RPS31     | YLR167W   | -1.662164516 | -10.14445017 | -3.570522288 | -2.841167018 |
| YLR168C   | YLR168C   | -1.101166858 | 2.75482713   | 2.967481875  | -1.077193499 |
| APS1      | YLR170C   | -1.103778143 | -1.06996307  | 1.457092667  | -1.361815849 |
| DPH5      | YLR172C   | -1.184798359 | -3.782447193 | -2.638840707 | -1.433374581 |
| YLR173W   | YLR173W   | -1.027792797 | 2.256427641  | 1.885058024  | 1.197006995  |
| IDP2      | YLR174W   | -1.185416158 | -1.548282115 | 1.716185768  | -1.108445129 |
| CBF5      | YLR175W   | 1.150600753  | -22.15792248 | -31.57700317 | 1.425088619  |
| RFX1      | YLR176C   | -1.046191759 | 2.508299673  | 2.147063009  | 1.168246886  |
| YLR177W   | YLR177W   | 1.200460536  | 6.883031398  | 6.75455303   | 1.019021002  |
| TFS1      | YLR178C   | 1.033533408  | 25.37723234  | 28.5434253   | -1.124765101 |
| YLR179C   | YLR179C   | -1.070091757 | -2.27410397  | -1.408647966 | -1.614387714 |
| SAM1      | YLR180W   | 1.318912764  | -38.43540755 | -51.18243372 | 1.331648004  |
| VTA1      | YLR181C   | -1.098425402 | -1.114084618 | -1.395403524 | 1.252511256  |
| SWI6      | YLR182W   | -1.021493741 | -1.008124764 | -1.162494708 | 1.153125834  |
| TOS4      | YLR183C   | -1.103256259 | -3.516552734 | -3.557441747 | 1.011627584  |
| RPL37A    | YLR185W   | 1.075707737  | -7.437448072 | -4.812309837 | -1.545504825 |
| EMG1      | YLR186W   | -1.146090014 | -13.95643919 | -15.22078898 | 1.090592577  |
| YLR187W   | YLR187W   | 1.307176775  | -1.039985534 | -1.229876574 | 1.279053846  |
| MDL1      | YLR188W   | -1.066755504 | -1.831666777 | -1.876541674 | 1.024499488  |
| UGT51     | YLR189C   | -1.001369603 | -1.655679518 | 1.864541598  | -1.126148858 |
| YLR190W   | YLR190W   | 1.064665171  | -1.022103502 | -1.094908497 | 1.11910981   |
| PEX13     | YLR191W   | -1.201000767 | -1.057022615 | 1.326490128  | -1.254930698 |
| HCR1      | YLR192C   | -1.111530561 | -1.406117412 | -1.422569766 | 1.011700555  |
| YLR193C   | YLR193C   | -1.030984664 | -1.486686431 | 1.356240921  | 1.096181666  |
| YLR194C   | YLR194C   | -1.242786304 | -1.794617004 | 2.564663306  | -1.429086708 |
| NMT1      | YLR195C   | -1.054836185 | -1.414031983 | -1.460851787 | 1.033110851  |
| PWP1      | YLR196W   | 1.018775623  | -21.26138828 | -21.79910715 | 1.025290863  |
| SIK1      | YLR197W   | -1.053576078 | -29.20240589 | -31.61730966 | 1.08269537   |
| YLR198C   | YLR198C   | 1.08374624   | -3.070790412 | -3.17366607  | 1.033501361  |
| YLR199C   | YLR199C   | 1.151056225  | -1.348928662 | 1.112872879  | 1.212113879  |

|         |         |              |              |              |              |
|---------|---------|--------------|--------------|--------------|--------------|
| YKE2    | YLR200W | -1.005872921 | -2.205366083 | -1.675552117 | -1.316202618 |
| YLR201C | YLR201C | 1.283076064  | -1.671939471 | 1.799816063  | -1.076483984 |
| YLR202C | YLR202C | 1.18044901   | -1.406726209 | 1.094390278  | 1.28539721   |
| MSS51   | YLR203C | 1.159157173  | -1.89632575  | 1.636746496  | 1.158594659  |
| QRI5    | YLR204W | -1.023982377 | -1.066938843 | 1.546810167  | -1.650351849 |
| HMX1    | YLR205C | -1.139617829 | 3.905347958  | 4.440061205  | -1.136918208 |
| ENT2    | YLR206W | 1.032325408  | -1.835688571 | 2.322809303  | -1.265361315 |
| HRD3    | YLR207W | -1.020373825 | -1.507425367 | 1.286704244  | 1.171539904  |
| SEC13   | YLR208W | 1.017211943  | -1.45350622  | -1.611844965 | 1.108935719  |
| PNP1    | YLR209C | 1.22464194   | -1.013611078 | -1.057240569 | 1.04304362   |
| CLB4    | YLR210W | -1.085547    | -1.385074128 | -1.368707509 | -1.011957719 |
| YLR211C | YLR211C | -1.144267743 | -1.603021501 | 1.230587133  | 1.302647701  |
| TUB4    | YLR212C | 1.000336395  | -2.170886374 | -1.617533643 | -1.342096581 |
| CRR1    | YLR213C | 1.248175419  | -1.056257057 | -1.21982723  | 1.28845112   |
| FRE1    | YLR214W | 1.502007002  | -6.500684495 | -9.780846547 | 1.504587179  |
| CDC123  | YLR215C | -1.10713314  | -2.005057127 | -2.301435608 | 1.14781548   |
| CPR6    | YLR216C | -1.082223234 | 10.56090214  | 17.81396205  | -1.686784124 |
| YLR217W | YLR217W | -1.353857553 | 3.99173554   | 7.381505967  | -1.849197145 |
| YLR218C | YLR218C | -1.385373887 | -1.226922058 | 1.156878119  | -1.419399283 |
| MSC3    | YLR219W | 1.121375902  | 2.129035888  | 1.986962272  | 1.071502926  |
| CCC1    | YLR220W | 1.036539768  | -1.336872034 | 1.492782392  | -1.116623248 |
| RSA3    | YLR221C | -1.114719145 | -8.645760572 | -7.844847162 | -1.102094202 |
| UTP13   | YLR222C | -1.035279164 | -23.78322346 | -33.00937665 | 1.387926944  |
| IFH1    | YLR223C | 1.045952798  | -2.017221238 | -2.202265559 | 1.091732288  |
| YLR224W | YLR224W | 1.040847864  | -1.178543651 | -1.156274337 | -1.019259542 |
| YLR225C | YLR225C | -1.10214363  | -1.654583037 | 1.606491116  | 1.029936001  |
| BUR2    | YLR226W | -1.195592662 | -1.377291846 | -1.20467201  | -1.143291979 |
| ADY4    | YLR227C | 1.028943783  | -1.122977008 | -1.205673814 | 1.073640694  |
| ECM22   | YLR228C | -1.001961706 | -1.226395007 | -1.119064346 | -1.095911072 |
| CDC42   | YLR229C | 1.007715622  | -1.961176577 | -1.610169716 | -1.217993704 |
| YLR230W | YLR230W | 1.228498556  | -1.711006517 | -1.249461586 | -1.369395054 |
| BNA5    | YLR231C | 1.155779436  | 2.0079499    | 1.577307427  | 1.273023803  |
| EST1    | YLR233C | 1.057810817  | -1.126513942 | -1.00855049  | 1.136146188  |
| TOP3    | YLR234W | 1.139870697  | -1.356788209 | 1.349414442  | 1.00546442   |
| YLR236C | YLR236C | 1.306501257  | -1.118665306 | -1.024472588 | 1.146041941  |
| THI7    | YLR237W | 1.449468181  | -1.436357387 | -1.995115457 | 1.389010476  |
| YLR238W | YLR238W | -1.115726286 | -1.447905118 | 1.644780426  | -1.13597252  |
| LIP2    | YLR239C | -1.282163772 | -1.107889027 | 1.383017326  | -1.248335612 |
| VPS34   | YLR240W | 1.121834815  | -1.948395225 | 1.649230626  | 1.181396461  |
| YLR241W | YLR241W | 1.176050344  | -1.977728011 | 1.658456629  | 1.192511143  |
| ARV1    | YLR242C | 1.151715445  | -2.239001398 | -2.12591725  | -1.053193109 |
| YLR243W | YLR243W | -1.085681318 | -3.64650173  | -3.434967704 | -1.061582538 |
| MAP1    | YLR244C | 1.064126828  | -1.754652093 | -1.953889267 | 1.113547965  |
| CDD1    | YLR245C | 1.246498498  | 2.31291122   | 2.382641468  | -1.03014826  |
| ERF2    | YLR246W | 1.166860984  | -1.33815443  | 1.254278232  | 1.066872083  |
| YLR247C | YLR247C | -1.099627431 | -1.481595341 | 1.721193332  | -1.161716215 |
| RCK2    | YLR248W | 1.156172775  | 2.615467307  | 2.396523538  | 1.091358906  |
| YEF3    | YLR249W | 1.120989997  | -13.37343493 | -12.99674048 | -1.028983763 |
| SSP120  | YLR250W | -1.269765266 | -1.626777599 | 1.780484097  | -1.094485256 |

|               |                |              |              |              |              |
|---------------|----------------|--------------|--------------|--------------|--------------|
| SYM1          | YLR251W        | -1.025837841 | 15.07317446  | 14.44196769  | 1.043706424  |
| YLR252W       | YLR252W        | 1.111546069  | 14.19682747  | 15.22433597  | -1.072375924 |
| YLR253W       | YLR253W        | -1.144187228 | -1.084455185 | -1.302549463 | 1.201109534  |
| YLR254C       | YLR254C        | -1.165765793 | -1.20380909  | 1.898495887  | -1.577073892 |
| YLR255C       | YLR255C        | 1.16391302   | -1.183975148 | -1.170837297 | -1.011220903 |
| HAP1          | YLR256W        | 1.05286896   | -1.189649775 | 1.362359101  | -1.145176614 |
| YLR257W       | YLR257W        | -1.172275814 | 2.953973853  | 2.597199163  | 1.137369015  |
| GSY2          | YLR258W        | 1.018738071  | 14.25496126  | 20.95198056  | -1.469802701 |
| HSP60         | YLR259C        | -1.05616715  | 4.300673766  | 6.864866506  | -1.59623047  |
| LCB5          | YLR260W        | -1.200569552 | 2.118231838  | 2.610526763  | -1.232408424 |
| VPS63         | YLR261C        | -1.196081208 | -1.142716671 | 1.270330858  | -1.451628248 |
| YPT6          | YLR262C        | -1.211730695 | -1.078536429 | 1.289105504  | -1.390347247 |
| YLR262C-A     | YLR262C-A      | 1.058606168  | -1.968005975 | -2.373656514 | 1.206122615  |
| RED1          | YLR263W        | 1.010713235  | -1.155203279 | 1.0767281    | 1.072883006  |
| <b>RPS28B</b> | <b>YLR264W</b> | 1.126897495  | -3.689623912 | -2.648205997 | -1.393254118 |
| NEJ1          | YLR265C        | 1.021318894  | -1.398485152 | -1.55646768  | 1.112966898  |
| PDR8          | YLR266C        | 1.173538692  | -1.934809208 | -2.325554384 | 1.201955404  |
| BOP2          | YLR267W        | 1.310679767  | 6.089054096  | 4.176850221  | 1.457810018  |
| SEC22         | YLR268W        | 1.021421199  | -1.143152142 | -1.233833648 | 1.079325842  |
| YLR270W       | YLR270W        | -1.123324183 | 4.881558824  | 4.874848141  | 1.001376594  |
| YLR271W       | YLR271W        | -1.061213699 | 3.190752582  | 3.57574686   | -1.120659395 |
| YCS4          | YLR272C        | 1.033708374  | -1.686647519 | -2.271593308 | 1.346809741  |
| PIG1          | YLR273C        | -1.209381358 | -1.580298058 | 1.751456734  | -1.108307844 |
| CDC46         | YLR274W        | -1.113148638 | -1.090865121 | 1.015013079  | -1.107242365 |
| SMD2          | YLR275W        | 1.142350411  | -1.208745513 | -1.431147745 | 1.183994256  |
| DBP9          | YLR276C        | -1.044127487 | -17.83536189 | -26.08689638 | 1.462650242  |
| YSH1          | YLR277C        | -1.065796491 | -1.441350727 | -1.400334415 | -1.029290369 |
| YLR278C       | YLR278C        | -1.00980843  | -1.203151551 | 1.271618779  | -1.05690657  |
| YLR280C       | YLR280C        | -1.128468766 | -1.26634963  | 1.555625603  | -1.228432943 |
| YLR281C       | YLR281C        | 1.146477564  | -1.146245614 | 1.175979305  | -1.02594007  |
| YLR283W       | YLR283W        | -1.333667452 | -1.463327678 | 1.956190658  | -1.336809716 |
| ECI1          | YLR284C        | -1.322566411 | -1.352282512 | 1.589090736  | -1.17511742  |
| YLR285W       | YLR285W        | -1.211018223 | -2.243341829 | -1.616175186 | -1.388056103 |
| CTS1          | YLR286C        | 1.061559499  | -1.141117946 | -1.547675124 | 1.356279717  |
| YLR287C       | YLR287C        | -1.226485817 | -2.906244417 | -2.762737184 | -1.05194386  |
| RPS30A        | YLR287C-A      | 1.062779046  | -3.304441103 | -2.755870765 | -1.199055176 |
| MEC3          | YLR288C        | -1.170893354 | -1.1673145   | 1.397789858  | -1.197440672 |
| GUF1          | YLR289W        | -1.132932372 | -1.722553814 | 1.750546817  | -1.016250872 |
| YLR290C       | YLR290C        | -1.228414416 | -1.660185248 | 1.896111542  | -1.142108415 |
| GCD7          | YLR291C        | 1.068105735  | -1.958612253 | -2.353530357 | 1.201631591  |
| SEC72         | YLR292C        | -1.094392668 | -1.34836727  | -1.186529484 | -1.136395923 |
| GSP1          | YLR293C        | 1.10932574   | -1.956370098 | -1.969627758 | 1.006776663  |
| YLR294C       | YLR294C        | 1.062284969  | -1.307417503 | 1.25360097   | 1.042929556  |
| ATP14         | YLR295C        | -1.016688436 | -1.091756709 | 1.270125334  | -1.163377631 |
| YLR297W       | YLR297W        | 1.223118123  | -1.906931067 | 1.348166404  | 1.414462682  |
| YHC1          | YLR298C        | -1.196551239 | -1.033709489 | 1.487403933  | -1.537543559 |
| ECM38         | YLR299W        | 1.044335778  | -1.638478783 | 1.447394828  | 1.132019233  |
| EXG1          | YLR300W        | 1.273313501  | -1.231704462 | -2.507210092 | 2.035561427  |
| YLR301W       | YLR301W        | -1.127727639 | -1.043159874 | 1.184058875  | -1.135069422 |

|         |           |              |              |              |              |
|---------|-----------|--------------|--------------|--------------|--------------|
| ACO1    | YLR304C   | 1.216038728  | 2.425890176  | 2.054411121  | 1.180820212  |
| STT4    | YLR305C   | 1.306495029  | -1.045285889 | -1.487800077 | 1.423342736  |
| UBC12   | YLR306W   | -1.071088588 | -1.311022906 | -1.393552259 | 1.062950352  |
| CDA1    | YLR307W   | -1.043593345 | -1.548457941 | 2.371762305  | -1.531693075 |
| IMH1    | YLR309C   | -1.038326224 | -1.376905352 | 1.358522207  | 1.013531721  |
| CDC25   | YLR310C   | 1.008620703  | -1.167198754 | -1.034380792 | -1.128403352 |
| YLR312C | YLR312C   | 1.001972869  | 4.41048574   | 6.325098904  | -1.43410483  |
| MRPL15  | YLR312W-A | -1.285260359 | -1.055758796 | -1.072874237 | 1.132696413  |
| SPH1    | YLR313C   | -1.190760697 | -1.451279124 | 1.008191697  | -1.463167563 |
| CDC3    | YLR314C   | 1.045812346  | -1.14491639  | -1.054769806 | 1.207623239  |
| NKP2    | YLR315W   | 1.026534923  | -1.599129938 | 1.783985106  | -1.115597341 |
| TAD3    | YLR316C   | -1.087499901 | -2.527627511 | -2.295429199 | -1.101156818 |
| KRE34   | YLR317W   | 1.096764672  | -1.704197093 | 2.017117555  | -1.18361753  |
| EST2    | YLR318W   | -1.072592779 | -19.3440619  | -2.238094871 | -8.643092906 |
| BUD6    | YLR319C   | 1.023308698  | -1.099146248 | -1.338209355 | 1.217498906  |
| MMS22   | YLR320W   | 1.118187905  | -1.046685525 | -1.130238096 | 1.07982586   |
| SFH1    | YLR321C   | 1.133431437  | -1.267940098 | -1.984899057 | 1.565451759  |
| CWC24   | YLR323C   | -1.226092491 | -1.547984579 | -1.55738674  | 1.006073808  |
| YLR324W | YLR324W   | 1.021995929  | 2.262923133  | 1.934209971  | 1.16994699   |
| RPL38   | YLR325C   | 1.020988246  | -12.6502904  | -10.00879767 | -1.263917087 |
| YLR326W | YLR326W   | -1.098386076 | -1.236364316 | 1.219415587  | 1.013899059  |
| YLR327C | YLR327C   | -1.112732524 | 67.2911488   | 124.8105144  | -1.854783529 |
| NMA1    | YLR328W   | 1.011085701  | -1.526807571 | -1.338827365 | -1.140406606 |
| REC102  | YLR329W   | 1.202774719  | -1.150072997 | -1.080596927 | -1.064294159 |
| CHS5    | YLR330W   | -1.11094532  | -1.035989766 | 1.176459294  | -1.218799789 |
| MID2    | YLR332W   | 1.249557621  | -1.486802794 | 1.294784039  | 1.148301762  |
| RPS25B  | YLR333C   | 1.067524416  | -5.146242029 | -3.568100066 | -1.442291958 |
| NUP2    | YLR335W   | -1.118572911 | -1.473921847 | -1.400517559 | -1.052412258 |
| SGD1    | YLR336C   | 1.029653182  | -3.596666345 | -3.649871818 | 1.014792996  |
| VRP1    | YLR337C   | 1.153358951  | 2.141530852  | 1.852177038  | 1.156223626  |
| KRE21   | YLR338W   | -1.066440213 | -1.627795873 | 2.66795023   | -1.638995573 |
| FKS1    | YLR342W   | 1.359513504  | -1.898740198 | -2.900126628 | 1.527395181  |
| YLR343W | YLR343W   | 1.310003478  | -1.070770957 | -1.290449266 | 1.205159009  |
| RPL26A  | YLR344W   | 1.052701224  | -11.35083869 | -7.705279496 | -1.473124847 |
| YLR345W | YLR345W   | -1.186126439 | 3.379832181  | 4.073958429  | -1.205372992 |
| YLR346C | YLR346C   | -1.472535968 | -1.465697839 | 1.512293782  | -2.216565727 |
| KAP95   | YLR347C   | 1.232193395  | -1.645759382 | 1.720018461  | -1.045121468 |
| DIC1    | YLR348C   | -1.131197929 | -1.283141293 | -1.053069102 | -1.218477771 |
| ORM2    | YLR350W   | 1.045654011  | 2.084045495  | 2.673237876  | -1.2827157   |
| NIT3    | YLR351C   | -1.4948746   | -1.868172042 | -1.068870254 | -1.747800572 |
| YLR352W | YLR352W   | 1.10803104   | -1.741166868 | 1.49372654   | 1.16565303   |
| BUD8    | YLR353W   | 1.03516672   | -1.190805074 | -1.536703223 | 1.290474197  |
| TAL1    | YLR354C   | 1.032525445  | -1.152860479 | -1.050411375 | -1.097532364 |
| ILV5    | YLR355C   | -1.080184779 | -7.738483162 | -11.12808468 | 1.438018853  |
| YLR356W | YLR356W   | 1.077038296  | 3.445641498  | 2.843800308  | 1.211632718  |
| RSC2    | YLR357W   | -1.044817185 | -1.31535525  | -1.516943799 | 1.153257873  |
| ADE13   | YLR359W   | 1.097362096  | -3.072933284 | -4.363151714 | 1.419865422  |
| VPS38   | YLR360W   | -1.202513901 | -1.211124065 | 1.354848504  | -1.118670286 |
| DCR2    | YLR361C   | 1.006967576  | -1.612621169 | 1.673230985  | -1.037584658 |

|               |                |              |              |              |              |
|---------------|----------------|--------------|--------------|--------------|--------------|
| STE11         | YLR362W        | 1.089267626  | -1.697766686 | 1.39792927   | 1.214486829  |
| NMD4          | YLR363C        | 1.167431552  | -1.279649497 | 1.08728624   | 1.17692053   |
| YLR363W-A     | YLR363W-A      | -1.023563767 | -7.102268125 | -6.35910223  | -1.116866481 |
| YLR364W       | YLR364W        | 1.161474633  | -1.701866548 | -2.075076868 | 1.219294704  |
| RPS22B        | YLR367W        | 1.282280745  | -6.453252114 | -4.964344453 | -1.299920296 |
| FLM1          | YLR368W        | -1.031410741 | -1.172234539 | -1.050677875 | 1.231640895  |
| SSQ1          | YLR369W        | -1.128600565 | -1.436906604 | 1.529115324  | -1.064171687 |
| ARC18         | YLR370C        | 1.136178185  | -1.428185625 | 1.723891173  | -1.2070498   |
| ROM2          | YLR371W        | 1.194992922  | 2.165887172  | 1.307855101  | 1.656060499  |
| SUR4          | YLR372W        | 1.206996373  | -5.960139463 | -7.935637586 | 1.331451661  |
| VID22         | YLR373C        | 1.003194821  | -1.019733994 | 1.122590416  | -1.144743608 |
| STP3          | YLR375W        | 1.051491816  | -1.019831571 | -1.07670151  | 1.098054193  |
| PSY3          | YLR376C        | -1.325902812 | -1.109726633 | 1.452535007  | -1.611916783 |
| FBP1          | YLR377C        | 1.307173306  | -1.30785707  | 1.533729646  | -1.172704328 |
| SEC61         | YLR378C        | 1.377741152  | -1.119554123 | -1.615602551 | 1.443076773  |
| YLR379W       | YLR379W        | 1.28072918   | -1.1043339   | -1.676351714 | 1.851252026  |
| CSR1          | YLR380W        | 1.086960645  | -1.188789135 | -1.162999679 | -1.022174947 |
| CTF3          | YLR381W        | 1.279292888  | -1.064633158 | -1.160366862 | 1.089921776  |
| NAM2          | YLR382C        | -1.089704231 | -1.447165841 | 1.513910478  | -1.046120932 |
| RHC18         | YLR383W        | 1.023925997  | -1.371102171 | -1.537061466 | 1.121040793  |
| IKI3          | YLR384C        | 1.077646549  | -4.225943796 | -3.937958474 | -1.073130614 |
| VAC14         | YLR386W        | -1.024620621 | -1.004383774 | 1.005330965  | -1.000943057 |
| YLR387C       | YLR387C        | -1.16854508  | -1.258290617 | 1.476867722  | -1.173709556 |
| <b>RPS29A</b> | <b>YLR388W</b> | 1.16265332   | -9.333325555 | -6.739918583 | -1.38478313  |
| STE23         | YLR389C        | 1.252260418  | -1.937459845 | -2.53217432  | 1.306955767  |
| ECM19         | YLR390W        | -1.069272335 | -1.049189191 | 1.027184626  | -1.077711007 |
| CCW14         | YLR390W-A      | 1.301408828  | -1.013955572 | -1.030649236 | 1.045032536  |
| YLR392C       | YLR392C        | -1.258068174 | 2.380291308  | 2.428487944  | -1.02024821  |
| ATP10         | YLR393W        | 1.309783395  | -1.838882917 | 1.569540785  | 1.171605692  |
| CST9          | YLR394W        | 1.003843443  | -1.525518053 | 1.434581666  | 1.063388784  |
| COX8          | YLR395C        | 1.110804757  | -1.154304967 | 1.633542623  | -1.415174214 |
| VPS33         | YLR396C        | -1.217172286 | -1.049868107 | 1.322384649  | -1.388329468 |
| AFG2          | YLR397C        | -1.019090265 | -3.227270025 | -3.17118084  | -1.017687161 |
| SKI2          | YLR398C        | 1.012632055  | -1.061717397 | 1.119284877  | -1.054221096 |
| BDF1          | YLR399C        | 1.160049566  | -1.474881724 | 1.583400053  | -1.073577648 |
| YLR401C       | YLR401C        | 1.085111025  | -12.6675734  | -18.20397643 | 1.437053163  |
| SFP1          | YLR403W        | 1.244761526  | -1.279354453 | -1.044975898 | 1.336894568  |
| YLR404W       | YLR404W        | 1.229415095  | -1.07623033  | -1.595442886 | 1.482436279  |
| YLR405W       | YLR405W        | 1.04088233   | -2.984972522 | -3.667462265 | 1.228641885  |
| <b>RPL31B</b> | <b>YLR406C</b> | -1.061408525 | -15.82647224 | -11.57845305 | -1.366890047 |
| YLR407W       | YLR407W        | 1.044184387  | -2.571722405 | -2.788073932 | 1.084127092  |
| YLR408C       | YLR408C        | 1.00719678   | -1.350347748 | 1.357621006  | -1.005386211 |
| UTP21         | YLR409C        | 1.028394796  | -17.74942811 | -21.17592076 | 1.19304806   |
| VIP1          | YLR410W        | 1.162360898  | -1.131603962 | -1.610522872 | 1.42322131   |
| CTR3          | YLR411W        | 1.000592238  | -1.057229464 | 1.175440455  | -1.111812047 |
| YLR412W       | YLR412W        | -1.135041592 | -1.338154253 | -1.359746407 | 1.016135774  |
| YLR413W       | YLR413W        | 1.266544525  | -26.11760925 | -32.34832628 | 1.238563835  |
| YLR414C       | YLR414C        | 1.194695361  | 2.44797156   | 2.101043949  | 1.165121538  |
| VPS36         | YLR417W        | -1.257486043 | -1.084182235 | 1.286952746  | -1.187026225 |

|         |           |              |              |              |              |
|---------|-----------|--------------|--------------|--------------|--------------|
| CDC73   | YLR418C   | -1.184842319 | -1.165425708 | -1.303829737 | 1.118758346  |
| YLR419W | YLR419W   | 1.0378186    | -2.450685231 | -2.86243943  | 1.168015947  |
| URA4    | YLR420W   | -1.220082776 | -2.330078886 | -2.941537532 | 1.262419719  |
| RPN13   | YLR421C   | 1.010546826  | -1.015407342 | 1.103822229  | -1.087073378 |
| YLR422W | YLR422W   | 1.237495362  | -1.637981607 | 1.176626147  | 1.392100295  |
| APG17   | YLR423C   | -1.175719967 | -1.924703561 | 1.838515173  | 1.046879346  |
| YLR424W | YLR424W   | 1.016291191  | -1.087201042 | -1.065543036 | 1.158459499  |
| TUS1    | YLR425W   | -1.106315344 | -1.990913643 | 1.877995422  | 1.060126995  |
| YLR426W | YLR426W   | 1.042362097  | -1.168625856 | 1.29196306   | -1.105540369 |
| YLR427W | YLR427W   | -1.106399593 | -1.32227028  | -1.241517439 | -1.065043662 |
| CRN1    | YLR429W   | -1.034285559 | -1.001575289 | 1.182004333  | -1.180145263 |
| SEN1    | YLR430W   | 1.206273541  | -2.007534656 | -2.940387519 | 1.464675845  |
| YLR431C | YLR431C   | -1.137595398 | -1.368997222 | 1.562571996  | -1.141398952 |
| IMD3    | YLR432W   | 1.242203158  | -7.097587526 | -7.976750357 | 1.123867839  |
| CNA1    | YLR433C   | -1.003084653 | -1.991782808 | -2.518027672 | 1.264207956  |
| YLR435W | YLR435W   | -1.367895755 | -11.73781286 | -11.32146695 | -1.036774908 |
| ECM30   | YLR436C   | 1.110436426  | -1.991411104 | 2.375166815  | -1.192705457 |
| YLR437C | YLR437C   | 1.067215266  | -1.059754862 | 1.450404635  | -1.368622771 |
| LSM3    | YLR438C-A | -1.144909705 | -1.799372614 | -1.16196237  | -1.548563586 |
| CAR2    | YLR438W   | 1.206515705  | 4.618776831  | 5.300594293  | -1.147618619 |
| MRPL4   | YLR439W   | 1.030419319  | -1.113767465 | 1.278312544  | -1.147737373 |
| YLR440C | YLR440C   | 1.073581972  | -1.137720389 | -1.522135135 | 1.337881566  |
| RPS1A   | YLR441C   | -1.148353049 | -6.234174246 | -5.843225664 | -1.066906295 |
| SIR3    | YLR442C   | -1.066286136 | -1.057437399 | 1.04754704   | 1.009441446  |
| ECM7    | YLR443W   | 1.111294196  | -1.174887749 | -1.48233038  | 1.261678302  |
| YLR446W | YLR446W   | 1.164526316  | 3.575113011  | 2.76247824   | 1.294168751  |
| VMA6    | YLR447C   | -1.029369504 | -1.61397656  | -1.694675612 | 1.050000138  |
| RPL6B   | YLR448W   | -1.118901811 | -8.770344689 | -7.166452881 | -1.223805533 |
| FPR4    | YLR449W   | -1.022997133 | -11.46079192 | -9.453214459 | -1.212369821 |
| HMG2    | YLR450W   | 1.154302814  | -1.339421546 | -1.46436797  | 1.093283869  |
| LEU3    | YLR451W   | -1.117113118 | -1.679287295 | -2.003903529 | 1.193305955  |
| SST2    | YLR452C   | 1.034976228  | -2.001995148 | -2.632573616 | 1.314975023  |
| YLR454W | YLR454W   | 1.121067854  | 2.317079597  | 1.918122597  | 1.207993483  |
| YLR455W | YLR455W   | -1.02874106  | -1.896868974 | 1.697224332  | 1.117630084  |
| YLR456W | YLR456W   | -1.20242381  | -1.64208469  | 1.308619681  | -2.148864343 |
| NBP1    | YLR457C   | -1.044179577 | -1.030926948 | -1.006861722 | 1.038000882  |
| CDC91   | YLR459W   | 1.261551202  | -1.115333729 | -1.596458843 | 1.431373229  |
| YLR460C | YLR460C   | 1.025662313  | -3.667629896 | -1.599618913 | -2.292814784 |
| PAU4    | YLR461W   | 1.085654484  | -1.160188474 | -1.026365051 | -1.130385794 |
| YLR462W | YLR462W   | -1.088277614 | -1.223524316 | -1.174835472 | -1.041443118 |
| YLR463C | YLR463C   | 1.270502677  | -1.212895319 | 1.029709094  | 1.177900949  |
| YLR464W | YLR464W   | 1.150019294  | -1.498841878 | -1.844294082 | 1.230479418  |
| YLR465C | YLR465C   | 1.27390697   | -1.050723627 | -1.041217023 | 1.094031326  |
| YRF1-4  | YLR466W   | -1.087837719 | -1.075541423 | 1.280464813  | -1.377192945 |
| YRF1-5  | YLR467W   | -1.075018281 | -1.041746419 | 1.249456814  | -1.301617162 |
| YPT7    | YML001W   | 1.084024505  | -1.191400552 | -1.259307579 | 1.056997646  |
| YML002W | YML002W   | 1.046258505  | -1.903290734 | 1.585994991  | 1.200060999  |
| GLO1    | YML004C   | 1.020621054  | 3.248248119  | 3.242450179  | 1.001788135  |
| YML005W | YML005W   | 1.28769263   | -1.722119444 | -2.683617059 | 1.558322258  |

|               |                |              |              |              |              |
|---------------|----------------|--------------|--------------|--------------|--------------|
| GIS4          | YML006C        | -1.000315038 | -1.440411848 | -1.524366914 | 1.058285459  |
| YAP1          | YML007W        | -1.020431532 | -1.347976909 | 1.060135602  | 1.271513669  |
| ERG6          | YML008C        | -1.103935159 | -2.091776607 | -2.265470899 | 1.083036731  |
| MRPL39        | YML009C        | 1.011401261  | -1.639675775 | -1.145645107 | -1.431224874 |
| YML009C-A     | YML009C-A      | -1.186963866 | -1.91112003  | 1.088057951  | -2.079409344 |
| YML009W-B     | YML009W-B      | 1.067509574  | -1.604499315 | -1.380018765 | -1.162664854 |
| SPT5          | YML010W        | 1.416367422  | -1.337334448 | -2.111832103 | 1.579135351  |
| YML011C       | YML011C        | -1.09546705  | -1.291391813 | -1.233914589 | -1.046581201 |
| ERV25         | YML012W        | -1.062392415 | -1.098356557 | 1.077932483  | 1.018947452  |
| SEL1          | YML013W        | 1.09615246   | -1.845264218 | 2.253533087  | -1.221252255 |
| YML014W       | YML014W        | 1.029840856  | -2.64497999  | -2.358491951 | -1.121470857 |
| TAF11         | YML015C        | -1.17573937  | -1.257076038 | -1.177005982 | -1.068028589 |
| PPZ1          | YML016C        | 1.175803775  | -1.058399633 | -1.303264381 | 1.231353772  |
| PSP2          | YML017W        | 1.429883005  | -1.483986752 | -1.608366478 | 2.386794546  |
| YML018C       | YML018C        | 1.071507647  | -4.614414058 | -4.939170869 | 1.070378775  |
| OST6          | YML019W        | 1.09755794   | -1.803439538 | -2.169248577 | 1.202839647  |
| YML020W       | YML020W        | 1.046123037  | -1.139596248 | -1.032143566 | 1.176226934  |
| UNG1          | YML021C        | -1.383515217 | -1.239863039 | 1.064113849  | -1.319355431 |
| APT1          | YML022W        | 1.132994236  | -6.199757307 | -6.587922886 | 1.062609802  |
| YML023C       | YML023C        | 1.134654496  | -2.002198062 | -2.168689445 | 1.083154303  |
| RPS17A        | YML024W        | 1.125761447  | -7.673532248 | -8.246266228 | 1.074637594  |
| YML025C       | YML025C        | -1.12240152  | -1.21956313  | 1.135715473  | 1.073828048  |
| <b>RPS18B</b> | <b>YML026C</b> | -1.224469936 | -14.68488959 | -9.3069063   | -1.577848654 |
| YOX1          | YML027W        | 1.222069627  | -2.285357364 | -3.331959995 | 1.457960163  |
| TSA1          | YML028W        | 1.072818011  | -1.207335723 | 1.589060449  | -1.316171152 |
| USA1          | YML029W        | 1.038828563  | -1.956745819 | 1.846375824  | 1.05977656   |
| YML030W       | YML030W        | -1.044990702 | -1.135375892 | 1.225041921  | -1.078974751 |
| NDC1          | YML031W        | -1.006863505 | -1.731782505 | -1.596725043 | -1.084584044 |
| RAD52         | YML032C        | 1.069914826  | -1.507405043 | 1.295865092  | 1.163242263  |
| SRC1          | YML034W        | -1.053713142 | -1.323330285 | 1.295591146  | 1.021410411  |
| AMD1          | YML035C        | -1.032183095 | -1.074219021 | 1.126407395  | -1.048582619 |
| YML036W       | YML036W        | 1.174243128  | -1.227144962 | -1.437400264 | 1.171336972  |
| YMD8          | YML038C        | 1.112591506  | -1.162149028 | -1.337184234 | 1.15061339   |
| VPS71         | YML041C        | -1.376815319 | -1.151972706 | 1.260698243  | -1.452289967 |
| CAT2          | YML042W        | 1.515172033  | 4.283345855  | 3.713308344  | 1.153512033  |
| RRN11         | YML043C        | -1.076489145 | -6.945786272 | -11.32756637 | 1.630854439  |
| PRP39         | YML046W        | -1.072864887 | -1.824251886 | -2.096661604 | 1.149326812  |
| PRM6          | YML047C        | -1.040048568 | -3.271169612 | -2.75204447  | -1.188632542 |
| GSF2          | YML048W        | 1.285382291  | -1.00638138  | 1.013601382  | -1.020069557 |
| RSE1          | YML049C        | 1.029788823  | -1.090505428 | 1.139888718  | -1.045284772 |
| YML050W       | YML050W        | -1.041891221 | -1.385694433 | -1.062224527 | 1.471918614  |
| GAL80         | YML051W        | 1.050067206  | -1.301595612 | -1.447487988 | 1.11208733   |
| SUR7          | YML052W        | 1.347166347  | -1.067591645 | -1.344384153 | 1.259268148  |
| YML053C       | YML053C        | -1.483219318 | -1.014671467 | 1.47048417   | -1.492058329 |
| CYB2          | YML054C        | 1.291980823  | 15.60462893  | 11.89115131  | 1.312289158  |
| SPC2          | YML055W        | -1.088112096 | -1.522451654 | -1.259982896 | -1.208311366 |
| IMD4          | YML056C        | 1.133553484  | -21.93282823 | -24.62157105 | 1.122589882  |
| CMP2          | YML057W        | 1.129931963  | -1.742613134 | 1.499616917  | 1.16203886   |
| SML1          | YML058W        | 1.225925193  | -1.622025946 | 1.435871417  | 1.129645682  |



|           |           |              |              |              |              |
|-----------|-----------|--------------|--------------|--------------|--------------|
| HUG1      | YML058W-A | 1.160572052  | -1.119314093 | -1.331182899 | 1.189284498  |
| YML059C   | YML059C   | 1.318583372  | -1.103485064 | -1.087688771 | 1.200248313  |
| OGG1      | YML060W   | 1.02390595   | -2.953947016 | -3.623662958 | 1.22671901   |
| PIF1      | YML061C   | -1.084040816 | -1.532260576 | -1.361733861 | -1.125227638 |
| MFT1      | YML062C   | -1.196894694 | -1.056654758 | 1.093304766  | -1.034684941 |
| RPS1B     | YML063W   | -1.040304989 | -8.408129853 | -9.639847991 | 1.146491332  |
| TEM1      | YML064C   | -1.235096715 | -1.198810642 | -1.191113115 | -1.006462466 |
| ORC1      | YML065W   | -1.024768618 | -1.013642233 | 1.034551324  | -1.020627683 |
| ERV41     | YML067C   | 1.253492906  | -1.001874567 | -1.213247948 | 1.215522263  |
| YML068W   | YML068W   | -1.15407979  | -1.565861153 | 1.796683603  | -1.147409269 |
| POB3      | YML069W   | -1.241625    | -1.384241773 | -1.052010526 | -1.31580601  |
| DAK1      | YML070W   | 1.069455567  | 3.698801621  | 3.268375519  | 1.131694201  |
| COG8      | YML071C   | -1.260874765 | -1.123582891 | 1.258522337  | -1.120097455 |
| YML072C   | YML072C   | 1.178234007  | -1.142800867 | -1.164748989 | 1.331076154  |
| RPL6A     | YML073C   | -1.275915489 | -11.40840008 | -8.248178777 | -1.383141707 |
| FPR3      | YML074C   | -1.262066921 | -1.616825958 | -1.050607536 | -1.538943805 |
| HMG1      | YML075C   | 1.319225125  | -1.730874738 | -2.477449422 | 1.431327968  |
| WAR1      | YML076C   | -1.127740373 | -1.053780044 | 1.306061335  | -1.239406025 |
| BET5      | YML077W   | -1.148730852 | -1.637738199 | 1.065084347  | -1.74432932  |
| CPR3      | YML078W   | -1.02449128  | -1.077678462 | 1.306363109  | -1.407839386 |
| YML079W   | YML079W   | -1.053188107 | -1.224275633 | 1.187437953  | -1.453751352 |
| DUS1      | YML080W   | -1.258707247 | -10.28242305 | -8.618795274 | -1.193023238 |
| ATP18     | YML081C-A | 1.413099251  | -1.331012614 | 1.014517659  | -1.350335803 |
| YML081W   | YML081W   | 1.126127662  | -1.792101053 | -2.221140843 | 1.239406026  |
| YML082W   | YML082W   | 1.043334473  | -3.214145388 | -4.114442862 | 1.280104776  |
| TUB1      | YML085C   | 1.147357968  | -1.024996444 | -1.014174414 | -1.010670778 |
| ALO1      | YML086C   | 1.137764468  | -1.327590305 | -1.399263669 | 1.053987562  |
| YML087C   | YML087C   | 1.145329494  | -1.354895419 | -1.478236389 | 1.091033572  |
| UFO1      | YML088W   | 1.04419974   | -1.429353966 | -1.141982067 | -1.251643092 |
| YML090W   | YML090W   | 1.294164846  | -1.003458685 | 1.21323006   | -1.209048342 |
| RPM2      | YML091C   | 1.359469601  | 2.578335352  | 1.791689516  | 1.439052541  |
| PRE8      | YML092C   | 1.160402153  | -1.254512968 | 1.108761553  | 1.131454246  |
| UTP14     | YML093W   | -1.054063195 | -16.9750879  | -16.1935154  | -1.048264535 |
| GIM5      | YML094W   | -1.136889897 | -2.508395756 | -2.348661298 | -1.068010853 |
| RAD10     | YML095C   | -1.004694714 | -1.49857131  | 1.486365064  | 1.008212145  |
| YML096W   | YML096W   | -1.088097024 | -4.587490793 | -4.369157387 | -1.049971513 |
| VPS9      | YML097C   | -1.041923417 | -1.640631862 | -1.832620222 | 1.117020987  |
| TAF13     | YML098W   | -1.218511606 | -1.84034497  | -1.325965003 | -1.387928766 |
| ARG81     | YML099C   | -1.048658468 | -1.023716664 | -1.031054027 | 1.055507189  |
| TSL1      | YML100W   | 1.133656721  | 16.06741458  | 21.2398886   | -1.321923231 |
| CUE4      | YML101C   | 1.072109219  | -1.060177207 | 1.763889285  | -1.870035216 |
| YML101C-A | YML101C-A | 1.363019689  | -1.011715411 | -1.348883674 | 1.364686401  |
| CAC2      | YML102W   | -1.016415353 | -1.120386178 | -1.0648086   | -1.0521949   |
| NUP188    | YML103C   | 1.207198875  | -1.193087229 | -1.601345665 | 1.342186578  |
| MDM1      | YML104C   | 1.051029359  | -1.350812075 | -1.547209458 | 1.145392084  |
| SEC65     | YML105C   | -1.096384891 | -1.793056647 | -1.889165932 | 1.053600808  |
| URA5      | YML106W   | 1.297763226  | -6.141576935 | -4.169262416 | -1.473060777 |
| YML107C   | YML107C   | -1.076527277 | -1.115865239 | 1.176652402  | -1.054475363 |
| YML108W   | YML108W   | -1.106172156 | -4.004723579 | -2.551104383 | -1.569799968 |

|           |           |              |              |              |              |
|-----------|-----------|--------------|--------------|--------------|--------------|
| ZDS2      | YML109W   | -1.021034233 | -1.292336167 | -1.188791587 | -1.087100701 |
| COQ5      | YML110C   | 1.033831761  | -1.592143546 | 1.446421267  | 1.100746776  |
| BUL2      | YML111W   | 1.024281997  | -1.217864083 | -1.429966792 | 1.174159589  |
| CTK3      | YML112W   | -1.019854507 | -1.040841468 | 1.026972134  | -1.068915184 |
| DAT1      | YML113W   | -1.197484345 | -5.875338284 | -4.723985534 | -1.243724869 |
| TAF8      | YML114C   | -1.073353772 | -1.021587514 | 1.224105701  | -1.2505311   |
| VAN1      | YML115C   | 1.173617892  | -1.279373403 | -1.530824796 | 1.196542614  |
| ATR1      | YML116W   | 1.228598697  | -2.61702592  | -2.891243147 | 1.104782007  |
| YML116W-A | YML116W-A | -1.064314606 | 2.063554851  | 2.31970018   | -1.12412819  |
| YML117W   | YML117W   | 1.017255082  | 2.222810265  | 1.943093646  | 1.143954266  |
| NGL3      | YML118W   | 1.328844597  | 3.692241682  | 2.877905211  | 1.282961533  |
| YML119W   | YML119W   | -1.088967544 | -1.246346413 | -1.250230846 | 1.003116656  |
| NDI1      | YML120C   | 1.104758929  | 3.714457481  | 3.215745754  | 1.155084315  |
| GTR1      | YML121W   | -1.304663426 | -1.328576869 | -1.132314559 | -1.173328434 |
| YML122C   | YML122C   | 1.256838179  | -1.856510678 | -1.252190709 | 2.324705421  |
| PHO84     | YML123C   | 1.08782537   | -4.330149154 | -6.192109015 | 1.429999013  |
| TUB3      | YML124C   | -1.215369867 | -1.113012953 | -1.11759741  | 1.004118961  |
| YML125C   | YML125C   | 1.029536552  | -3.050661838 | -3.318373957 | 1.087755423  |
| ERG13     | YML126C   | 1.193691798  | -2.246626308 | -2.754601561 | 1.226105807  |
| RSC9      | YML127W   | 1.166501641  | -1.681614176 | 1.680534864  | 1.000642243  |
| MSC1      | YML128C   | -1.202945423 | 28.60345364  | 34.45228006  | -1.204479728 |
| COX14     | YML129C   | -1.442395159 | -1.021750491 | 2.547312217  | -2.602717507 |
| ERO1      | YML130C   | -1.004477191 | 5.908935342  | 6.499844531  | -1.100002649 |
| YML131W   | YML131W   | 1.095210246  | -1.638424236 | 2.878441424  | -1.756835233 |
| COS3      | YML132W   | 1.094930426  | -1.583706617 | 1.668975474  | -1.05384132  |
| YML133C   | YML133C   | -1.081930651 | -1.051227861 | 1.265688414  | -1.330526923 |
| CDC5      | YMR001C   | -1.115012969 | -1.898167636 | -2.184077653 | 1.150624219  |
| YMR002W   | YMR002W   | -1.113097448 | -1.002499417 | 1.184547469  | -1.187508147 |
| YMR003W   | YMR003W   | -1.23738912  | -2.225425087 | -1.428274282 | -1.558121654 |
| MVP1      | YMR004W   | -1.038329049 | -1.489040992 | 1.281014714  | 1.162391795  |
| TAF4      | YMR005W   | -1.216863346 | -1.194956775 | -1.17809365  | -1.014313909 |
| PLB2      | YMR006C   | 1.286777458  | -5.359871778 | -6.328636809 | 1.180744069  |
| PLB1      | YMR008C   | 1.103340884  | -1.74802137  | 1.684809851  | 1.037518489  |
| YMR009W   | YMR009W   | -1.055495701 | -1.516263689 | 1.439441765  | 1.053369247  |
| YMR010W   | YMR010W   | 1.092460863  | -1.194934839 | -1.496523011 | 1.252388801  |
| HXT2      | YMR011W   | 1.281076794  | -1.308272982 | -1.238895327 | -1.05599961  |
| CLU1      | YMR012W   | 1.013280707  | -2.355396012 | -2.298192613 | -1.024890603 |
| SEC59     | YMR013C   | 1.152266728  | -1.20530019  | -1.360173417 | 1.128493489  |
| YMR013W-A | YMR013W-A | 1.159766412  | -2.335578145 | -3.026787705 | 1.295947948  |
| BUD22     | YMR014W   | -1.100026532 | -7.144697494 | -8.62756015  | 1.207547298  |
| ERG5      | YMR015C   | 1.280302049  | -1.201551468 | -2.10454761  | 1.751525145  |
| SOK2      | YMR016C   | -1.032673748 | -3.387729546 | -3.739744953 | 1.103908946  |
| SPO20     | YMR017W   | 1.204256832  | 2.549518907  | 2.104417127  | 1.211508343  |
| STB4      | YMR019W   | -1.059677924 | -1.239141038 | -1.441476669 | 1.163287007  |
| FMS1      | YMR020W   | -1.006300602 | 2.415180301  | 2.334383909  | 1.034611441  |
| MAC1      | YMR021C   | -1.183057889 | -1.14627752  | 1.159757902  | -1.011760138 |
| QR18      | YMR022W   | 1.138385443  | -1.616821355 | 2.398904076  | -1.483716224 |
| MSS1      | YMR023C   | -1.224833828 | -1.454416951 | 1.794838372  | -1.234060405 |
| MRPL3     | YMR024W   | -1.104194942 | -1.056154166 | 1.231433381  | -1.165959877 |

|           |           |              |              |              |              |
|-----------|-----------|--------------|--------------|--------------|--------------|
| CSI1      | YMR025W   | -1.036207964 | -1.472102821 | 1.383222314  | 1.064256126  |
| PEX12     | YMR026C   | -1.180133618 | -1.4657732   | -1.277938841 | -1.146982276 |
| HRT2      | YMR027W   | -1.152378234 | -1.456464055 | 1.442073449  | 1.009979108  |
| TAP42     | YMR028W   | -1.044920083 | -1.457691286 | 1.209370673  | 1.205330439  |
| YMR029C   | YMR029C   | -1.264458078 | -1.397800222 | 1.684836982  | -1.205348916 |
| YMR030W   | YMR030W   | 1.001105086  | 2.661621911  | 2.224732237  | 1.196378542  |
| YMR031C   | YMR031C   | 1.224752233  | 2.921027135  | 2.369790353  | 1.232609935  |
| HOF1      | YMR032W   | -1.020660832 | -1.02914311  | -1.023839694 | 1.053677566  |
| ARP9      | YMR033W   | -1.314157784 | -2.006039415 | -1.555091627 | -1.289981491 |
| YMR034C   | YMR034C   | 1.031861822  | -1.032848933 | 1.221061522  | -1.182226638 |
| IMP2      | YMR035W   | 1.202038665  | -1.263116974 | 1.067230867  | 1.183546141  |
| MIH1      | YMR036C   | -1.170441675 | -1.039810057 | 1.464448795  | -1.522748584 |
| MSN2      | YMR037C   | 1.024485195  | -1.203524235 | 1.26261153   | -1.049095227 |
| LYS7      | YMR038C   | -1.194446885 | -1.526931077 | -1.232767503 | -1.238620481 |
| SUB1      | YMR039C   | -1.165294035 | -1.037554355 | 1.141248065  | -1.1841069   |
| YMR040W   | YMR040W   | -1.136144824 | -1.797802372 | 2.192970911  | -1.219806439 |
| YMR041C   | YMR041C   | 1.152875834  | 2.64485197   | 2.069287951  | 1.278145928  |
| ARG80     | YMR042W   | 1.233142934  | -1.245829631 | -1.538007231 | 1.234524523  |
| MCM1      | YMR043W   | 1.046852877  | -1.054706905 | 1.107666749  | -1.050212855 |
| IOC4      | YMR044W   | -1.019999627 | -1.194176858 | -1.100035774 | 1.313637265  |
| YMR046W-A | YMR046W-A | -1.063194553 | -1.064201808 | 1.221743484  | -1.300181623 |
| NUP116    | YMR047C   | 1.069671476  | -1.081156173 | 1.089405716  | -1.007630298 |
| CSM3      | YMR048W   | -1.14478499  | -1.215771624 | -1.271574503 | 1.045899147  |
| ERB1      | YMR049C   | 1.124476248  | -32.81593167 | -32.87340454 | 1.001751371  |
| YMR052C-A | YMR052C-A | 1.016593102  | 2.760105025  | 3.813433009  | -1.381626051 |
| FAR3      | YMR052W   | 1.082690352  | -1.521935748 | 1.287842924  | 1.181771254  |
| STB2      | YMR053C   | -1.083456401 | 5.132568269  | 5.670016816  | -1.104713375 |
| STV1      | YMR054W   | 1.134839587  | -1.159669475 | 1.171796105  | -1.010456972 |
| BUB2      | YMR055C   | 1.213893582  | -1.288405617 | -1.574965107 | 1.222414034  |
| AAC1      | YMR056C   | 1.006664431  | -1.778951335 | 2.679600967  | -1.506281208 |
| FET3      | YMR058W   | 1.193921378  | -2.308589678 | -2.807458054 | 1.216092266  |
| SEN15     | YMR059W   | 1.024125932  | -2.119942428 | -1.649486335 | -1.285213695 |
| TOM37     | YMR060C   | -1.231545945 | -1.220954173 | -1.092698695 | -1.117374971 |
| RNA14     | YMR061W   | -1.07817879  | -2.340742732 | -2.269460209 | -1.031409462 |
| ECM40     | YMR062C   | -1.057653841 | -1.313751662 | -1.310402216 | -1.002556044 |
| RIM9      | YMR063W   | -1.021229038 | -1.075030047 | 1.166849223  | -1.0854108   |
| AEP1      | YMR064W   | -1.081474463 | -1.195374363 | -1.030492029 | 1.231823753  |
| KAR5      | YMR065W   | -1.210045026 | -1.359318946 | -1.329044012 | -1.022779482 |
| SOV1      | YMR066W   | 1.012955552  | -1.272271838 | 1.042663614  | 1.220213135  |
| YMR067C   | YMR067C   | 1.010603037  | -1.454810156 | 1.46949985   | -1.010097328 |
| AVO2      | YMR068W   | -1.131555226 | 2.333414573  | 2.926319534  | -1.254093279 |
| YMR069W   | YMR069W   | -1.047456606 | -1.027184547 | 1.261578733  | -1.29587418  |
| MOT3      | YMR070W   | -1.024659346 | -1.282203579 | 1.482748809  | -1.156406699 |
| YMR071C   | YMR071C   | -1.098478646 | -1.267838472 | 1.541797913  | -1.95475071  |
| ABF2      | YMR072W   | -1.101058336 | -1.021227445 | -1.010753345 | -1.010362667 |
| YMR073C   | YMR073C   | -1.124319002 | -1.480774836 | -1.186947333 | -1.247548897 |
| YMR074C   | YMR074C   | -1.058766821 | -1.339817243 | -1.240102985 | -1.080408046 |
| RCO1      | YMR075W   | -1.04995834  | -1.31383529  | -1.030491851 | 1.353896559  |
| PDS5      | YMR076C   | 1.039505775  | -1.989724439 | -2.476217555 | 1.244502759  |

|           |           |              |              |              |              |
|-----------|-----------|--------------|--------------|--------------|--------------|
| VPS20     | YMR077C   | -1.147452203 | -1.207405777 | 1.107813208  | 1.089900146  |
| CTF18     | YMR078C   | -1.084175545 | -1.622957813 | -1.795584344 | 1.106365383  |
| SEC14     | YMR079W   | 1.049577106  | -2.14580707  | -2.532939917 | 1.180413633  |
| NAM7      | YMR080C   | 1.134413408  | -1.781956918 | -2.409868663 | 1.352372012  |
| ISF1      | YMR081C   | 1.10210015   | 2.29110068   | 3.125715378  | -1.364285474 |
| ADH3      | YMR083W   | -1.151431243 | -1.106323623 | 1.580141284  | -1.428281247 |
| YMR085W   | YMR085W   | -1.029835388 | 3.542425644  | 4.243665885  | -1.197954823 |
| YMR086C-A | YMR086C-A | 1.215109378  | -1.051020005 | -1.024689243 | -1.02569634  |
| YMR086W   | YMR086W   | 1.04359912   | -1.632760249 | 1.720272732  | -1.053597877 |
| YMR087W   | YMR087W   | 1.043863339  | -1.159346532 | 1.090073545  | 1.063548911  |
| YMR088C   | YMR088C   | -1.550701247 | -1.827854771 | -1.552351885 | -1.177474507 |
| YTA12     | YMR089C   | 1.003475641  | -1.171341236 | 1.137605729  | 1.029654832  |
| YMR090W   | YMR090W   | 1.052661136  | 8.031978742  | 8.092756383  | -1.007566957 |
| NPL6      | YMR091C   | 1.00153516   | -1.224097885 | -1.425679165 | 1.164677419  |
| AIP1      | YMR092C   | 1.043309017  | 2.064194175  | 2.194969946  | -1.063354394 |
| UTP15     | YMR093W   | 1.184052621  | -8.982089658 | -14.00478704 | 1.559190296  |
| SNZ1      | YMR096W   | 1.039302191  | -1.459104996 | -1.157803031 | -1.260235944 |
| MTG1      | YMR097C   | -1.141327932 | -1.566232155 | 1.364400428  | 1.147927047  |
| YMR098C   | YMR098C   | -1.135242589 | -1.343918917 | 1.38487938   | -1.030478373 |
| YMR099C   | YMR099C   | -1.034453702 | -1.276204377 | 1.27454749   | 1.001299981  |
| MUB1      | YMR100W   | -1.127829742 | -1.223319181 | 1.123179203  | 1.089157614  |
| YMR102C   | YMR102C   | -1.112734237 | -1.016959196 | 1.378566701  | -1.401946085 |
| YMR103C   | YMR103C   | 1.06009808   | 6.626911276  | 5.649057694  | 1.1731003    |
| YPK2      | YMR104C   | -1.02414954  | 5.437054969  | 4.927076142  | 1.103505368  |
| PGM2      | YMR105C   | -1.020605336 | 51.39512346  | 57.65655393  | -1.121829272 |
| YKU80     | YMR106C   | 1.085425062  | -1.071779932 | 1.060695059  | 1.010450575  |
| YMR107W   | YMR107W   | 1.471899294  | 5.777875288  | 4.553145354  | 1.268985468  |
| ILV2      | YMR108W   | 1.075839248  | -1.612644149 | -1.376772339 | -1.171322304 |
| MYO5      | YMR109W   | 1.053659927  | -1.657761472 | 1.256058044  | 1.31981279   |
| YMR110C   | YMR110C   | 1.153177588  | 4.92500957   | 3.581256214  | 1.375218437  |
| YMR111C   | YMR111C   | -1.132491693 | -1.90119639  | 1.945453555  | -1.023278587 |
| MED11     | YMR112C   | -1.397855769 | -1.374578898 | 1.425393258  | -1.959315493 |
| FOL3      | YMR113W   | -1.107015625 | -1.270694046 | -1.056857487 | -1.202332444 |
| YMR114C   | YMR114C   | -1.196366228 | 2.0443134    | 3.120108771  | -1.526237989 |
| YMR115W   | YMR115W   | -1.016581917 | 2.036332563  | 1.464045585  | 1.390894234  |
| ASC1      | YMR116C   | -1.144618814 | -6.124721741 | -3.726943055 | -1.643363381 |
| SPC24     | YMR117C   | 1.024903198  | -1.051656607 | -1.220924323 | 1.16095341   |
| YMR118C   | YMR118C   | 1.087915987  | 6.556585874  | 3.400362355  | 1.928202112  |
| ASI1      | YMR119W   | 1.125320832  | -1.56757835  | 1.253382381  | 1.250678464  |
| YMR119W-A | YMR119W-A | 1.295252772  | -1.512845636 | 1.077072502  | 1.404590345  |
| ADE17     | YMR120C   | 1.079506382  | -1.071344332 | -1.350984737 | 1.261018234  |
| RPL15B    | YMR121C   | -1.245050698 | -1.36814222  | 2.245642854  | -1.641381152 |
| YMR122C   | YMR122C   | 1.217543234  | -1.492596435 | -1.638395198 | 1.097681302  |
| YMR122W-A | YMR122W-A | -1.032692462 | -1.111839343 | 1.375447395  | -1.529276528 |
| PKR1      | YMR123W   | 1.104247116  | -2.086694159 | -1.69516954  | -1.230964874 |
| YMR124W   | YMR124W   | 1.016385059  | -1.659845443 | 1.551633631  | 1.069740568  |
| STO1      | YMR125W   | -1.000143601 | -2.070396905 | -2.199078968 | 1.062153331  |
| YMR126C   | YMR126C   | 1.107083039  | -1.612062999 | -1.646015184 | 1.021061327  |
| SAS2      | YMR127C   | -1.269405737 | -4.935838639 | -4.179023635 | -1.181098522 |

|           |           |              |              |              |              |
|-----------|-----------|--------------|--------------|--------------|--------------|
| ECM16     | YMR128W   | 1.16385373   | -12.93042839 | -16.48395047 | 1.274818589  |
| POM152    | YMR129W   | 1.024347134  | -1.80193765  | -1.627074623 | -1.107470809 |
| YMR130W   | YMR130W   | -1.037440949 | -1.81976597  | -1.70926558  | -1.064647876 |
| RRB1      | YMR131C   | -1.139951503 | -22.56550675 | -25.85281102 | 1.145678282  |
| YMR132C   | YMR132C   | -1.316987819 | -1.834471172 | -1.567023559 | -1.170672362 |
| YMR134W   | YMR134W   | -1.172298582 | -1.250076348 | -1.09942323  | -1.13702923  |
| DCR1      | YMR135C   | -1.071488428 | 2.511396496  | 3.014250916  | -1.200229004 |
| GAT2      | YMR136W   | 1.254778761  | 3.957181628  | 2.723902577  | 1.452761807  |
| PSO2      | YMR137C   | -1.186222083 | -1.414909458 | 2.017495543  | -1.425883142 |
| CIN4      | YMR138W   | 1.028290633  | -3.343977352 | -3.170780448 | -1.054622799 |
| RIM11     | YMR139W   | 1.060532615  | 2.668879119  | 2.346971341  | 1.137158802  |
| YMR140W   | YMR140W   | 1.146518705  | 2.348005347  | 1.923229815  | 1.220865717  |
| YMR141C   | YMR141C   | -1.028171906 | -1.481548491 | -1.030583172 | -1.437582653 |
| RPL13B    | YMR142C   | -1.400689544 | -10.06326998 | -6.605156369 | -1.523547576 |
| RPS16A    | YMR143W   | 1.222032571  | -5.171278038 | -5.014282599 | -1.031309651 |
| YMR144W   | YMR144W   | -1.099009192 | -1.568699897 | -1.799362393 | 1.14704055   |
| NDE1      | YMR145C   | 1.397357156  | -1.453299732 | -1.000572651 | 1.454131967  |
| TIF34     | YMR146C   | -1.171437153 | -3.912720948 | -3.811034322 | -1.02668216  |
| YMR147W   | YMR147W   | 1.181499748  | -1.154995391 | -1.16754737  | 1.348511832  |
| YMR148W   | YMR148W   | 1.122920436  | -1.325786533 | 1.314282058  | 1.00875343   |
| SWP1      | YMR149W   | 1.029035355  | -1.319171283 | -1.125747701 | -1.171817878 |
| IMP1      | YMR150C   | -1.153101015 | -1.049918706 | 1.115639902  | -1.171331202 |
| YIM1      | YMR152W   | 1.146989604  | 2.676895882  | 2.305465465  | 1.161108645  |
| YMR153C-A | YMR153C-A | -1.05832108  | 2.21797455   | 2.578139118  | -1.162384446 |
| NUP53     | YMR153W   | -1.20196119  | -1.191387357 | 1.040138817  | -1.239208236 |
| RIM13     | YMR154C   | -1.054949972 | -1.523943957 | 1.873143118  | -1.229141734 |
| YMR155W   | YMR155W   | 1.124334523  | -1.796004144 | 1.329599019  | 1.350786304  |
| TPP1      | YMR156C   | 1.210017051  | -1.321551876 | -1.06677572  | 1.409799454  |
| YMR157C   | YMR157C   | -1.093763095 | -1.0377766   | 1.240388712  | -1.195236733 |
| YMR158C-B | YMR158C-B | -1.013550013 | -1.30313059  | 1.418129129  | -1.088247901 |
| YMR158W   | YMR158W   | -1.046134234 | -1.048956965 | 1.018045366  | 1.030363675  |
| YMR160W   | YMR160W   | -1.060727772 | 2.881386568  | 2.673428004  | 1.077787233  |
| HLJ1      | YMR161W   | 1.075897282  | -1.516383838 | 1.625793701  | -1.072151826 |
| DNF3      | YMR162C   | 1.004051376  | -1.161551501 | 1.153631841  | 1.006864982  |
| YMR163C   | YMR163C   | 1.116444005  | -1.081172719 | -1.187247297 | 1.098110668  |
| MSS11     | YMR164C   | -1.161132921 | -1.193002895 | 1.226737139  | -1.028276749 |
| SMP2      | YMR165C   | -1.001330247 | 2.17595818   | 2.319881735  | -1.066142611 |
| YMR166C   | YMR166C   | -1.048463586 | -1.365733556 | 1.410102618  | -1.032487348 |
| MLH1      | YMR167W   | -1.041721423 | -1.271678774 | 1.395247811  | -1.097170008 |
| CEP3      | YMR168C   | 1.048706492  | -1.323184637 | 1.116856892  | 1.184739645  |
| ALD3      | YMR169C   | -1.066192198 | 67.23278785  | 98.85213696  | -1.470296563 |
| ALD2      | YMR170C   | 1.122475176  | 3.903042869  | 3.819176578  | 1.02195926   |
| YMR171C   | YMR171C   | 1.092135533  | -1.318323435 | -1.038268663 | 1.368773909  |
| HOT1      | YMR172W   | 1.109506335  | -1.328460712 | -1.398451981 | 1.052685991  |
| DDR48     | YMR173W   | -1.209252337 | 2.129458753  | 3.344537274  | -1.570604395 |
| YMR173W-A | YMR173W-A | -1.11569184  | 2.485467238  | 3.453351078  | -1.38941726  |
| PAI3      | YMR174C   | 1.128030034  | 5.926495995  | 5.522353781  | 1.073182963  |
| ECM5      | YMR176W   | -1.028276893 | -1.075926025 | -1.218265269 | 1.132294638  |
| MMT1      | YMR177W   | -1.287461891 | -32.67068912 | -2.371660846 | -13.77544735 |

|           |           |              |              |              |              |
|-----------|-----------|--------------|--------------|--------------|--------------|
| YMR178W   | YMR178W   | -1.239518638 | -1.138902803 | -1.014644956 | -1.122464362 |
| SPT21     | YMR179W   | -1.211188142 | -1.802136476 | -1.390184647 | -1.296328858 |
| CTL1      | YMR180C   | -1.141648407 | -1.202506697 | 1.254163317  | -1.042957449 |
| YMR181C   | YMR181C   | 1.107796167  | 4.314841206  | 5.152259856  | -1.194078671 |
| SSO2      | YMR183C   | -1.028420983 | -1.229409421 | -1.347006943 | 1.09565367   |
| YMR184W   | YMR184W   | -1.203992133 | -1.646516258 | 2.745423647  | -1.667413628 |
| YMR185W   | YMR185W   | -1.072003832 | -6.516675501 | -5.624476164 | -1.158627988 |
| HSC82     | YMR186W   | -1.239938074 | -1.866098284 | 4.438848529  | -2.378678855 |
| YMR187C   | YMR187C   | 1.049681966  | -1.831529707 | -2.215704475 | 1.209756231  |
| YMR188C   | YMR188C   | -1.150481231 | -1.054363112 | 1.05026502   | 1.00390196   |
| GCV2      | YMR189W   | 1.214577164  | 2.319443456  | 1.349035552  | 1.719334566  |
| SGS1      | YMR190C   | -1.043040931 | -1.424708085 | 1.305991771  | 1.090901272  |
| YMR191W   | YMR191W   | 1.172089575  | -1.895883622 | 1.976688043  | -1.042620982 |
| YMR192W   | YMR192W   | -1.125926001 | -1.0001461   | -1.240554303 | 1.240735547  |
| YMR193C-A | YMR193C-A | 1.431236422  | -3.38709286  | -2.455786292 | -1.379229484 |
| MRPL24    | YMR193W   | -1.287666442 | -1.320819727 | 1.427531004  | -1.080791704 |
| YMR194C-A | YMR194C-A | 1.106102745  | -1.462404932 | 1.681141443  | -1.149573149 |
| RPL36A    | YMR194W   | -1.105350269 | -15.15752638 | -9.226729418 | -1.642784316 |
| ICY1      | YMR195W   | 1.048340657  | 2.511075941  | 2.885647495  | -1.149167753 |
| YMR196W   | YMR196W   | -1.151110485 | 20.77728046  | 27.5163568   | -1.324348336 |
| VTI1      | YMR197C   | -1.152512255 | 2.69625453   | 2.338765244  | 1.152853856  |
| CIK1      | YMR198W   | -1.224265692 | -1.033093521 | 1.478276838  | -1.430922571 |
| CLN1      | YMR199W   | 1.005884809  | -2.434043676 | -3.317935355 | 1.363137148  |
| ROT1      | YMR200W   | -1.002909454 | -1.510745312 | 1.434132289  | 1.053421169  |
| RAD14     | YMR201C   | -1.254787058 | -1.7968241   | 2.247700355  | -1.250929546 |
| ERG2      | YMR202W   | 1.163887681  | -2.654662749 | -2.281442164 | -1.163589764 |
| TOM40     | YMR203W   | -1.046186827 | -1.198712653 | -1.126197772 | -1.064389118 |
| YMR204C   | YMR204C   | 1.042314257  | -1.339230634 | -1.005586561 | 1.346712328  |
| PFK2      | YMR205C   | 1.117724485  | -1.17504515  | -1.158990382 | -1.013852374 |
| YMR206W   | YMR206W   | -1.379209857 | 3.709260453  | 5.43293371   | -1.464694588 |
| HFA1      | YMR207C   | -1.031810087 | -1.505316791 | -1.369537035 | -1.099142814 |
| ERG12     | YMR208W   | 1.199200331  | -1.076041665 | -1.352282538 | 1.256719495  |
| YMR209C   | YMR209C   | -1.006238965 | -1.654799918 | -1.80976107  | 1.093643437  |
| YMR210W   | YMR210W   | 1.087993234  | -1.660483161 | 1.402223091  | 1.184179016  |
| DML1      | YMR211W   | -1.180631223 | -1.366110017 | -1.286663313 | -1.061746304 |
| EFR3      | YMR212C   | 1.174862643  | -1.715606416 | -1.875710416 | 1.093322104  |
| CEF1      | YMR213W   | -1.074818119 | -1.109834035 | 1.248720397  | -1.12514156  |
| SCJ1      | YMR214W   | -1.076366012 | -1.671840616 | 2.074274448  | -1.240713037 |
| GAS3      | YMR215W   | 1.20601211   | -1.322434185 | -1.698004309 | 1.283999104  |
| SKY1      | YMR216C   | 1.115879113  | -1.143652475 | 1.100442913  | 1.03926561   |
| GUA1      | YMR217W   | 1.239278158  | -10.07097348 | -9.73012409  | -1.035030323 |
| TRS130    | YMR218C   | -1.027021328 | -1.088577934 | 1.039595037  | 1.047117286  |
| ESC1      | YMR219W   | -1.010416228 | -1.476078101 | 1.367912557  | 1.079073435  |
| ERG8      | YMR220W   | -1.150457185 | -1.121385484 | -1.00168086  | -1.119503754 |
| YMR221C   | YMR221C   | 1.137218964  | -1.839746012 | -2.266793688 | 1.23212317   |
| FSH2      | YMR222C   | 1.039110277  | -1.042094254 | -1.092780747 | 1.048639068  |
| UBP8      | YMR223W   | 1.128877107  | -1.622011315 | -1.959264212 | 1.207922653  |
| MRE11     | YMR224C   | -1.119597791 | -1.018086443 | -1.075164039 | 1.056063604  |
| MRPL44    | YMR225C   | -1.096379734 | -1.101340052 | -1.22373127  | 1.111129363  |

|               |                |              |              |              |              |
|---------------|----------------|--------------|--------------|--------------|--------------|
| YMR226C       | YMR226C        | -1.224554313 | -1.123314559 | 1.247119872  | -1.400907909 |
| TAF7          | YMR227C        | -1.117189345 | -1.35207041  | -1.060200747 | -1.275296602 |
| MTF1          | YMR228W        | -1.248606018 | -1.010008759 | -1.027799893 | 1.038086894  |
| RRP5          | YMR229C        | 1.010728368  | -44.56150514 | -38.64483492 | -1.153103778 |
| <b>RPS10B</b> | <b>YMR230W</b> | 1.108464907  | -7.5154846   | -4.58124639  | -1.640489063 |
| PEP5          | YMR231W        | -1.118904617 | -1.031627468 | -1.042476524 | 1.010516447  |
| FUS2          | YMR232W        | 1.054272849  | -1.461530942 | -1.015972133 | 1.484874708  |
| TRI1          | YMR233W        | -1.218136146 | -1.789953472 | -1.414417397 | -1.265505837 |
| RNH1          | YMR234W        | -1.076286867 | -1.607632067 | -1.726974292 | 1.074234788  |
| RNA1          | YMR235C        | -1.104896349 | -1.926422359 | -2.13356159  | 1.107525346  |
| TAF9          | YMR236W        | -1.182228632 | -1.258094679 | 1.157952957  | -1.456814454 |
| YMR237W       | YMR237W        | -1.023815083 | -1.625755907 | 1.77873233   | -1.094095566 |
| DFG5          | YMR238W        | -1.048327941 | -1.327007784 | -1.29477079  | -1.024897839 |
| RNT1          | YMR239C        | -1.027835138 | -12.82856192 | -14.89046912 | 1.160727853  |
| CUS1          | YMR240C        | -1.071653968 | -1.361555054 | -1.305049193 | -1.043297878 |
| YHM2          | YMR241W        | 1.084095973  | -4.471926821 | -5.997600672 | 1.341166998  |
| <b>RPL20A</b> | <b>YMR242C</b> | -1.199930876 | -11.81467482 | -8.391609949 | -1.407915154 |
| ZRC1          | YMR243C        | 1.203062189  | -2.54144886  | -3.186114412 | 1.253660643  |
| YMR244C-A     | YMR244C-A      | -1.043759091 | -1.161395956 | 1.77246857   | -1.526153558 |
| FAA4          | YMR246W        | -1.029515066 | -8.092410289 | -7.564858913 | -1.069737107 |
| YMR247C       | YMR247C        | 1.168400652  | -1.376219319 | -1.794395758 | 1.303858864  |
| GAD1          | YMR250W        | 1.075559467  | 26.9791912   | 25.35386094  | 1.064105829  |
| YMR251W       | YMR251W        | 1.411992713  | -1.493458973 | 1.138179474  | 1.312147166  |
| HOR7          | YMR251W-A      | 1.377624937  | 8.76133146   | 9.373074833  | -1.069823106 |
| YMR252C       | YMR252C        | 1.215120001  | -1.402469992 | 1.455102872  | -1.037528704 |
| YMR253C       | YMR253C        | 1.383787942  | 2.281056681  | 1.711230662  | 1.33299194   |
| GFD1          | YMR255W        | -1.139884192 | -1.101576651 | 1.179437397  | -1.070681188 |
| COX7          | YMR256C        | -1.104086916 | -1.029562689 | 2.31097822   | -2.244621182 |
| PET111        | YMR257C        | 1.224074523  | -1.069502061 | -1.123396929 | 1.20147533   |
| YMR258C       | YMR258C        | 1.113250188  | 2.21830593   | 2.54768671   | -1.148483027 |
| YMR259C       | YMR259C        | 1.128645813  | -16.23969434 | -4.658567276 | -3.485984723 |
| TIF11         | YMR260C        | -1.122596603 | -3.290292144 | -2.41050596  | -1.364979883 |
| TPS3          | YMR261C        | 1.206115842  | 4.304681447  | 3.929082438  | 1.095594586  |
| YMR262W       | YMR262W        | -1.056191617 | 2.950638835  | 3.50043176   | -1.186330133 |
| SAP30         | YMR263W        | -1.269648106 | -1.689028446 | -1.286254087 | -1.313137477 |
| CUE1          | YMR264W        | -1.004046429 | -1.138076812 | 1.000700553  | 1.137280087  |
| YMR265C       | YMR265C        | -1.061840499 | -1.160559272 | 1.378862068  | -1.188101377 |
| RSN1          | YMR266W        | 1.310843927  | -2.715097983 | -3.682350703 | 1.356249655  |
| PPA2          | YMR267W        | -1.111554025 | -1.189931248 | -1.045264683 | 1.243793109  |
| PRP24         | YMR268C        | -1.071677437 | -1.537394679 | -1.542477975 | 1.003306435  |
| YMR269W       | YMR269W        | -1.025517585 | -5.952384806 | -5.926020948 | -1.00444883  |
| RRN9          | YMR270C        | -1.083298124 | -1.320856176 | -1.237223342 | -1.0675972   |
| URA10         | YMR271C        | -1.02300307  | 2.807807633  | 2.535865605  | 1.107238344  |
| SCS7          | YMR272C        | 1.135717373  | -1.154031302 | -1.198208299 | 1.382769885  |
| ZDS1          | YMR273C        | -1.0432093   | -1.38628532  | 1.647466575  | -1.188403679 |
| RCE1          | YMR274C        | 1.212379368  | -1.422326879 | -1.322700182 | -1.075320696 |
| BUL1          | YMR275C        | 1.095636929  | -1.360307145 | 1.229078938  | 1.106769552  |
| DSK2          | YMR276W        | 1.128119178  | -1.344541804 | 1.161651128  | 1.157440277  |
| FCP1          | YMR277W        | -1.056509029 | -1.3216318   | -1.38023167  | 1.044339028  |

|           |           |              |              |              |              |
|-----------|-----------|--------------|--------------|--------------|--------------|
| YMR278W   | YMR278W   | -1.21480408  | 2.934864264  | 3.408282015  | -1.161308227 |
| CAT8      | YMR280C   | 1.016905089  | 7.413713884  | 7.195131459  | 1.030379212  |
| GPI12     | YMR281W   | 1.19522608   | -1.592408265 | 1.388483881  | 1.146868384  |
| AEP2      | YMR282C   | -1.291591641 | -1.454394289 | -1.438003305 | -1.011398432 |
| RIT1      | YMR283C   | -1.126570399 | -1.19842733  | -1.252524967 | 1.045140524  |
| YKU70     | YMR284W   | 1.005677286  | 2.43652399   | 2.018613524  | 1.207028468  |
| NGL2      | YMR285C   | -1.038854409 | -1.642475989 | -1.987235283 | 1.209902182  |
| MRPL33    | YMR286W   | 1.037231013  | -1.498967141 | -1.210914536 | -1.237880211 |
| MSU1      | YMR287C   | -1.001693947 | -1.127291258 | 1.009185515  | 1.117030754  |
| HSH155    | YMR288W   | -1.060727343 | -1.411418648 | -1.239331642 | -1.138854686 |
| YMR289W   | YMR289W   | -1.109516866 | -1.007254559 | 1.087684585  | -1.079850745 |
| HAS1      | YMR290C   | -1.036391039 | -16.40865554 | -13.82487016 | -1.186894007 |
| YMR291W   | YMR291W   | -1.000157925 | 3.365042256  | 4.088057167  | -1.214860574 |
| GOT1      | YMR292W   | 1.435307917  | -1.720657234 | -2.350844218 | 1.366247833  |
| YMR293C   | YMR293C   | -1.071904996 | -1.439886198 | 1.466979609  | -1.018816356 |
| JNM1      | YMR294W   | -1.11538071  | -1.030028574 | 1.115687213  | -1.149189708 |
| YMR294W-A | YMR294W-A | -1.004555824 | -1.123668176 | 1.234044588  | -1.386656632 |
| YMR295C   | YMR295C   | -1.049569999 | -1.020938222 | 1.187055709  | -1.211910544 |
| LCB1      | YMR296C   | 1.116208982  | -1.351147586 | -1.594229468 | 1.179907721  |
| PRC1      | YMR297W   | -1.103303616 | 2.12438415   | 3.405885287  | -1.603234183 |
| YMR298W   | YMR298W   | 1.002223274  | -1.032309683 | 1.102062074  | -1.13766935  |
| YMR299C   | YMR299C   | -1.165229698 | -1.172359004 | -1.474638912 | 1.257839029  |
| ADE4      | YMR300C   | 1.020672899  | -2.913694989 | -2.758594179 | -1.056224584 |
| ATM1      | YMR301C   | 1.063803659  | -3.429701033 | -3.889107917 | 1.133949543  |
| PRP12     | YMR302C   | -1.203608748 | 2.100659363  | 2.1948741    | -1.044850079 |
| ADH2      | YMR303C   | 1.072117658  | -1.923586501 | 1.808214464  | 1.0638044    |
| YMR304C-A | YMR304C-A | 1.261308553  | -13.89786891 | -19.12727469 | 1.376273932  |
| UBP15     | YMR304W   | 1.002401104  | 2.539934161  | 2.338862366  | 1.085969913  |
| SCW10     | YMR305C   | 1.154690957  | -11.89037081 | -17.30930069 | 1.455741033  |
| GAS1      | YMR307W   | -1.002262158 | -3.511477772 | -3.805908016 | 1.083847959  |
| PSE1      | YMR308C   | 1.093626718  | -3.094587703 | -4.01370468  | 1.297007894  |
| NIP1      | YMR309C   | 1.125398404  | -5.629980795 | -8.030533122 | 1.426387303  |
| YMR310C   | YMR310C   | 1.121829655  | -5.346078104 | -6.321695789 | 1.182492224  |
| GLC8      | YMR311C   | -1.2479464   | -1.495938706 | 2.307891846  | -1.542771664 |
| ELP6      | YMR312W   | 1.379249457  | -2.633530612 | -3.771346333 | 1.432049552  |
| YMR313C   | YMR313C   | 1.041503144  | -1.329530827 | 1.222425223  | 1.087617305  |
| PRE5      | YMR314W   | -1.195018851 | -1.119967184 | 1.205988975  | -1.07680742  |
| YMR315W   | YMR315W   | 1.158328254  | 4.152067875  | 3.258779284  | 1.274117549  |
| YMR316C-B | YMR316C-B | 1.095341955  | 2.041561546  | 2.242115269  | -1.098235453 |
| DIA1      | YMR316W   | -1.022268177 | 2.020720621  | 2.5314503    | -1.252746309 |
| YMR317W   | YMR317W   | -1.114566187 | -1.361204912 | 1.428746355  | -1.944816557 |
| ADH6      | YMR318C   | 1.121877476  | -1.573995357 | -1.912135674 | 1.214829298  |
| FET4      | YMR319C   | 1.175595263  | -2.750424815 | -4.151972374 | 1.509574939  |
| YMR320W   | YMR320W   | 1.150545941  | -1.779023983 | -1.913677251 | 1.075689405  |
| YMR321C   | YMR321C   | -1.081978872 | -4.093363562 | -4.203106657 | 1.026810004  |
| YMR322C   | YMR322C   | 1.04443156   | 2.314512015  | 2.39424015   | -1.03444706  |
| YMR325W   | YMR325W   | 1.035088377  | -1.227719026 | 1.488446789  | -1.212367617 |
| DOM34     | YNL001W   | -1.291771841 | -2.514984136 | -2.806000432 | 1.115712975  |
| RLP7      | YNL002C   | -1.162051482 | -22.97457865 | -26.40840604 | 1.14946204   |



|         |         |              |              |              |              |
|---------|---------|--------------|--------------|--------------|--------------|
| PET8    | YNL003C | 1.041589949  | -1.194295776 | 1.131696017  | 1.055314994  |
| HRB1    | YNL004W | -1.077210432 | -1.499277484 | -1.328751382 | -1.128335597 |
| MRP7    | YNL005C | -1.363280219 | -1.126219516 | 1.346884366  | -1.195934138 |
| LST8    | YNL006W | -1.134146179 | 5.006201202  | 9.252194682  | -1.84814679  |
| SIS1    | YNL007C | -1.220296377 | 5.334136726  | 12.86631802  | -2.412071284 |
| ASI3    | YNL008C | 1.050125279  | -1.031187411 | 1.008599144  | -1.04005474  |
| YNL010W | YNL010W | -1.033195819 | -3.070740182 | -2.967414594 | -1.034820071 |
| YNL011C | YNL011C | -1.094823854 | -1.668447038 | 1.689457777  | -1.012592992 |
| SPO1    | YNL012W | -1.115788136 | 2.035593402  | 3.045597343  | -1.49617175  |
| HEF3    | YNL014W | 1.395905556  | 3.593498798  | 2.248720203  | 1.598019529  |
| PBI2    | YNL015W | -1.316796213 | 4.064979039  | 8.888685796  | -2.186649848 |
| PUB1    | YNL016W | 1.084593958  | -1.532564071 | -2.213095457 | 1.444047592  |
| YNL019C | YNL019C | 1.029631224  | 2.216858962  | 2.625036067  | -1.184124075 |
| ARK1    | YNL020C | -1.022094139 | -1.313776233 | -1.059598611 | 1.392075471  |
| HDA1    | YNL021W | 1.008082448  | -1.196564116 | 1.1034351    | 1.084399179  |
| YNL022C | YNL022C | -1.072354434 | -3.025369838 | -3.151837451 | 1.041802364  |
| FAP1    | YNL023C | -1.133259757 | -3.200552163 | -2.834567076 | -1.129114985 |
| YNL024C | YNL024C | -1.059756136 | -4.201647421 | -4.245901771 | 1.010532619  |
| SSN8    | YNL025C | 1.064155079  | 2.563372511  | 2.719906573  | -1.061065671 |
| YNL026W | YNL026W | 1.098211     | -1.890234155 | 1.473705004  | 1.282640793  |
| CRZ1    | YNL027W | -1.238724012 | -1.035289009 | 1.183818833  | -1.143467015 |
| KTR5    | YNL029C | 1.021655326  | -1.400638245 | -1.683973657 | 1.202290215  |
| HHF2    | YNL030W | -1.390123319 | -2.405844181 | -1.422161018 | -1.69168199  |
| HHT2    | YNL031C | -1.107924026 | -1.301876499 | -1.105771739 | -1.177346511 |
| SIW14   | YNL032W | -1.184537895 | -1.355336962 | -1.184545155 | -1.14418345  |
| YNL033W | YNL033W | 1.100770017  | 2.476872325  | 2.719368697  | -1.097904267 |
| YNL035C | YNL035C | 1.088480409  | -1.560247367 | -1.452698613 | -1.07403377  |
| NCE103  | YNL036W | -1.322661298 | 3.353194039  | 5.813191866  | -1.733628236 |
| IDH1    | YNL037C | -1.012660215 | 2.604026711  | 2.353514703  | 1.106441658  |
| GPI15   | YNL038W | -1.082463913 | -2.550935753 | -1.932985978 | -1.319686631 |
| BDP1    | YNL039W | 1.046903987  | -1.10483097  | 1.033992028  | 1.068510144  |
| YNL040W | YNL040W | 1.057325526  | -1.536993028 | 1.136300134  | 1.352629452  |
| COG6    | YNL041C | -1.087288387 | -1.192530588 | -1.311031523 | 1.099369304  |
| BOP3    | YNL042W | -1.146143408 | -1.182470352 | 1.364052809  | -1.153561953 |
| YNL043C | YNL043C | 1.087578644  | -1.263161074 | 1.007460023  | -1.272584284 |
| YIP3    | YNL044W | 1.339077392  | -1.209376665 | -1.248732265 | 1.032542053  |
| YNL045W | YNL045W | 1.199124847  | 2.119899843  | 2.06980481   | 1.024202782  |
| YNL046W | YNL046W | 1.189264397  | -1.008443749 | -1.093311748 | 1.084157395  |
| YNL047C | YNL047C | -1.040410544 | -1.279834995 | -1.084653264 | -1.179948503 |
| ALG11   | YNL048W | 1.095296084  | -1.300337344 | -1.520322225 | 1.169175238  |
| SFB2    | YNL049C | 1.137510835  | -1.181548606 | -1.174332788 | -1.006144612 |
| YNL050C | YNL050C | -1.137475794 | -1.950874266 | -1.822199928 | -1.07061483  |
| COG5    | YNL051W | -1.225069997 | -1.216187324 | 1.317800563  | -1.083550648 |
| COX5A   | YNL052W | 1.105462337  | -1.213702473 | 1.354535079  | -1.116035527 |
| MSG5    | YNL053W | -1.104262011 | -1.899292269 | -2.354129615 | 1.239477279  |
| VAC7    | YNL054W | -1.025239235 | -1.278081785 | 1.369794483  | -1.071758082 |
| POR1    | YNL055C | 1.048764677  | 2.760647223  | 3.405347549  | -1.233532311 |
| YNL056W | YNL056W | -1.211775543 | -1.44238764  | -1.34328935  | -1.073772854 |
| YNL057W | YNL057W | 1.106531742  | -1.113497265 | -1.21657413  | 1.092570379  |

|         |         |              |              |              |              |
|---------|---------|--------------|--------------|--------------|--------------|
| YNL058C | YNL058C | 1.108953163  | 2.172631636  | 2.005540337  | 1.083314853  |
| ARP5    | YNL059C | -1.068800819 | -1.210714241 | -1.166166437 | -1.038200212 |
| NOP2    | YNL061W | 1.023241473  | -31.61268819 | -25.18007805 | -1.255464264 |
| GCD10   | YNL062C | 1.012290014  | -16.80899284 | -18.27537772 | 1.087238116  |
| YNL063W | YNL063W | -1.110548746 | -1.689091936 | 2.177093276  | -1.288913427 |
| YDJ1    | YNL064C | -1.181421845 | 2.282385728  | 2.998350611  | -1.313691447 |
| AQR1    | YNL065W | 1.075520737  | -4.214400873 | -7.817803213 | 1.855021258  |
| SUN4    | YNL066W | 1.755434635  | -3.7019986   | -4.051831343 | 1.094498345  |
| RPL9B   | YNL067W | -1.221212163 | -9.175282537 | -6.673850587 | -1.374810901 |
| FKH2    | YNL068C | -1.079125831 | -1.342464482 | -1.424536342 | 1.061135219  |
| RPL16B  | YNL069C | 1.141563409  | -6.669875108 | -6.266152632 | -1.064429084 |
| TOM7    | YNL070W | 1.44570876   | -1.506203797 | -1.471829239 | -1.023354991 |
| LAT1    | YNL071W | -1.023371104 | -1.191611697 | 1.212876207  | -1.017845167 |
| RNH35   | YNL072W | -1.307425225 | -3.520894039 | -2.653440181 | -1.326916681 |
| MSK1    | YNL073W | -1.100667052 | -1.160348343 | 1.343141018  | -1.157532585 |
| MLF3    | YNL074C | 1.148495084  | 2.35856444   | 2.375564842  | -1.007207945 |
| IMP4    | YNL075W | -1.069913868 | -16.3833501  | -15.24999365 | -1.074318487 |
| MKS1    | YNL076W | -1.02869377  | -1.205597581 | 1.121752379  | 1.074744839  |
| YNL077W | YNL077W | 1.17495213   | 5.116500478  | 8.503598148  | -1.661994987 |
| NIS1    | YNL078W | -1.040915068 | -1.080803496 | -1.413371735 | 1.307704629  |
| TPM1    | YNL079C | -1.182929126 | -1.015441188 | 1.25897078   | -1.239826388 |
| YNL080C | YNL080C | 1.184793065  | -1.025070814 | -1.116875562 | 1.089559421  |
| YNL081C | YNL081C | -1.280349959 | -1.017955117 | 1.294789537  | -1.271951498 |
| PMS1    | YNL082W | 1.001346455  | -1.439542035 | -1.760741229 | 1.223125957  |
| YNL083W | YNL083W | -1.021600843 | -1.119395264 | 1.358918393  | -1.213975471 |
| END3    | YNL084C | -1.123263681 | -1.251416298 | 1.087191433  | 1.15105423   |
| MKT1    | YNL085W | 1.141015801  | -1.388201812 | -1.863174308 | 1.342149458  |
| YNL086W | YNL086W | -1.036402423 | -1.138607159 | -1.097695109 | -1.03727087  |
| YNL087W | YNL087W | 1.099687791  | -3.734875824 | -3.451723193 | -1.082032253 |
| TOP2    | YNL088W | 1.044461112  | -1.45922241  | -1.533668804 | 1.051017853  |
| RHO2    | YNL090W | -1.044387688 | -1.488566586 | -1.438599668 | -1.034733025 |
| NST1    | YNL091W | 1.249047565  | -1.250272369 | 1.014162364  | 1.232812825  |
| YNL092W | YNL092W | 1.171252865  | 5.107519664  | 3.52384477   | 1.449416759  |
| YPT53   | YNL093W | -1.098702974 | 6.800932486  | 7.489945225  | -1.10131151  |
| APP1    | YNL094W | 1.081380181  | -1.259660678 | 1.138286945  | 1.106628415  |
| YNL095C | YNL095C | 1.156901252  | -1.493803614 | -2.093947704 | 1.401755682  |
| RPS7B   | YNL096C | -1.140916706 | -8.943308489 | -8.395857052 | -1.06520495  |
| PHO23   | YNL097C | -1.04776781  | -1.048831647 | 1.316216809  | -1.380489844 |
| RAS2    | YNL098C | -1.001686935 | -1.830516413 | 2.273348116  | -1.241916271 |
| OCA1    | YNL099C | -1.417845443 | -1.667937381 | -1.088988258 | -1.531639455 |
| YNL100W | YNL100W | -1.120929512 | -1.892593477 | 2.035007895  | -1.075248287 |
| YNL101W | YNL101W | 1.306189698  | -1.288681068 | -1.167668473 | 1.504752255  |
| POL1    | YNL102W | -1.106341636 | -4.157551568 | -3.229152314 | -1.287505562 |
| MET4    | YNL103W | -1.074380795 | -1.14914235  | -1.034940365 | -1.110346441 |
| LEU4    | YNL104C | 1.105955228  | -1.020725206 | 1.09903044   | -1.121808072 |
| INP52   | YNL106C | 1.060139322  | -1.164671779 | 1.198054582  | -1.028662842 |
| YAF9    | YNL107W | -1.093519848 | -1.036288752 | -1.16360792  | 1.122860706  |
| YNL108C | YNL108C | -1.064568138 | -1.782719192 | -1.39146826  | -1.281178481 |
| NOP15   | YNL110C | -1.110680706 | -23.60799433 | -27.14962877 | 1.150018438  |

|         |         |              |              |              |              |
|---------|---------|--------------|--------------|--------------|--------------|
| CYB5    | YNL111C | -1.046137931 | -7.592422457 | -5.468392096 | -1.388419544 |
| DBP2    | YNL112W | -1.006637232 | -14.75138546 | -11.44707825 | -1.288659441 |
| RPC19   | YNL113W | -1.28867069  | -9.617972792 | -8.232316681 | -1.168319096 |
| YNL115C | YNL115C | 1.046646103  | 2.780554815  | 2.575447734  | 1.079639388  |
| YNL116W | YNL116W | 1.044495704  | -1.20989843  | -1.046363697 | -1.156288616 |
| MLS1    | YNL117W | -1.045703364 | 2.128915836  | 2.476564537  | -1.163298471 |
| DGP2    | YNL118C | -1.01914244  | -1.381963106 | 1.287593438  | 1.07329151   |
| YNL119W | YNL119W | -1.15659947  | -9.177847615 | -9.409449418 | 1.025234871  |
| TOM70   | YNL121C | -1.180643321 | -1.137969276 | -1.412146941 | 1.240935912  |
| YNL122C | YNL122C | -1.313026074 | -1.134666875 | 1.620072264  | -1.427795505 |
| YNL123W | YNL123W | 1.113823715  | -1.793445922 | -2.259322858 | 1.25976637   |
| NAF1    | YNL124W | 1.066687479  | -1.233761882 | -1.262294818 | 1.023126777  |
| ESBP6   | YNL125C | 1.268478331  | 4.725604399  | 4.364078915  | 1.082841188  |
| SPC98   | YNL126W | -1.033073125 | -2.598109626 | -2.448477655 | -1.061112247 |
| YNL127W | YNL127W | 1.102449112  | -1.893151889 | 1.538461357  | 1.230548873  |
| TEP1    | YNL128W | -1.094280694 | -1.206455796 | 1.458127326  | -1.208604021 |
| YNL129W | YNL129W | -1.226477929 | -1.119575956 | 1.03778398   | -1.161877992 |
| CPT1    | YNL130C | 1.152924164  | -1.742708853 | 1.679397582  | 1.037698798  |
| TOM22   | YNL131W | 1.18408025   | -1.456128153 | -1.611839366 | 1.106935103  |
| KRE33   | YNL132W | 1.063858827  | -39.62747808 | -31.97434262 | -1.239352394 |
| FYV6    | YNL133C | -1.212269692 | -1.174721036 | 1.795261334  | -1.528244817 |
| YNL134C | YNL134C | 1.306304453  | -1.839959996 | 2.2826995    | -1.240624527 |
| FPR1    | YNL135C | 1.14056652   | -1.231677748 | 1.178080674  | -1.451015751 |
| YNL136W | YNL136W | -1.279273572 | -1.16216061  | 1.435602302  | -1.235287352 |
| NAM9    | YNL137C | -1.141439557 | -1.093292961 | -1.018044755 | -1.073914438 |
| SRV2    | YNL138W | -1.174465726 | -1.100584763 | 1.384419446  | -1.257894433 |
| RLR1    | YNL139C | 1.179426042  | -1.104627051 | -1.443773662 | 1.594831442  |
| YNL140C | YNL140C | 1.057814983  | -1.048353428 | -1.126741553 | 1.074772613  |
| AAH1    | YNL141W | 1.067244808  | -61.70129183 | -55.17838057 | -1.118214982 |
| MEP2    | YNL142W | 1.211443812  | -1.005570311 | -1.231909068 | 1.225084963  |
| YNL144C | YNL144C | 1.044163023  | -1.896834759 | 2.125178902  | -1.120381673 |
| MFA2    | YNL145W | 1.387442851  | -1.543466077 | -1.873347807 | 1.213727878  |
| LSM7    | YNL147W | -1.194586331 | -1.721617176 | -1.254059089 | -1.37283577  |
| ALF1    | YNL148C | 1.10391334   | -2.086976696 | -2.229451897 | 1.068268707  |
| YNL149C | YNL149C | -1.162309133 | -2.165880046 | -1.688288755 | -1.282884839 |
| YNL150W | YNL150W | -1.119103119 | -1.784975967 | -1.284580437 | -1.389540053 |
| RPC31   | YNL151C | -1.035767792 | -7.135057606 | -9.090182625 | 1.274016711  |
| YNL152W | YNL152W | 1.117940687  | -1.406379607 | -1.49186897  | 1.060786834  |
| GIM3    | YNL153C | -1.272170061 | -2.018848039 | -1.610289137 | -1.253717729 |
| YCK2    | YNL154C | -1.108417968 | -1.203180338 | -1.130490728 | -1.064299165 |
| YNL155W | YNL155W | -1.210836835 | -1.939951065 | 2.397462444  | -1.235836556 |
| YNL156C | YNL156C | 1.02343154   | 2.238852086  | 1.902384766  | 1.176866072  |
| YNL157W | YNL157W | -1.018138495 | -1.068541671 | 1.082032656  | -1.012625606 |
| YNL158W | YNL158W | -1.207520693 | -1.171054487 | -1.017962618 | -1.150390463 |
| ASI2    | YNL159C | 1.032915412  | 2.093465105  | 2.116836565  | -1.011164008 |
| YGP1    | YNL160W | -1.005229312 | 12.06361329  | 12.88017208  | -1.067687746 |
| CBK1    | YNL161W | 1.065071703  | -1.007451256 | -1.069783464 | 1.06187119   |
| RPL42A  | YNL162W | -1.097914953 | -11.75311288 | -8.92626121  | -1.316689328 |
| RIA1    | YNL163C | 1.000064673  | -2.928054273 | -2.927092026 | -1.000328738 |

|         |         |              |              |              |              |
|---------|---------|--------------|--------------|--------------|--------------|
| IBD2    | YNL164C | -1.376311507 | -3.334794246 | -2.323755914 | -1.435088008 |
| YNL165W | YNL165W | -1.057849365 | -1.310593998 | -1.372307913 | 1.047088507  |
| BNI5    | YNL166C | -1.112532004 | -1.586637993 | -1.683090385 | 1.060790421  |
| SKO1    | YNL167C | -1.066292508 | -1.550178049 | 1.979817116  | -1.277154659 |
| YNL168C | YNL168C | 1.049124109  | -1.246191486 | 1.27470579   | -1.022881158 |
| PSD1    | YNL169C | 1.070022525  | -1.094192762 | 1.07553669   | 1.017345826  |
| APC1    | YNL172W | 1.081507004  | -1.193996629 | 1.12343636   | 1.062807535  |
| MDG1    | YNL173C | -1.038693277 | 2.989252097  | 3.600707613  | -1.204551338 |
| NOP13   | YNL175C | -1.133432222 | -39.02935012 | -35.21359985 | -1.10836013  |
| YNL176C | YNL176C | 1.254210975  | -1.235032334 | -1.046042368 | 1.291896148  |
| YNL177C | YNL177C | -1.335265541 | -1.088950032 | 1.350225436  | -1.239933326 |
| RPS3    | YNL178W | -1.448451129 | -9.430640107 | -5.49786429  | -1.715327918 |
| YNL179C | YNL179C | 1.551752121  | -1.017753006 | -1.311449514 | 1.288573463  |
| RHO5    | YNL180C | -1.098369714 | -1.168408708 | -1.147857138 | -1.017904292 |
| YNL181W | YNL181W | -1.209154782 | -1.327820909 | -1.149001616 | -1.15563015  |
| YNL182C | YNL182C | -1.196577462 | -21.84588751 | -23.5201918  | 1.076641624  |
| NPR1    | YNL183C | 1.184439873  | -1.537399805 | 1.312038814  | 1.171763966  |
| MRPL19  | YNL185C | 1.058938013  | -1.003646302 | 1.031086259  | -1.027340266 |
| UBP10   | YNL186W | 1.052089949  | -3.915886273 | -4.021155832 | 1.026882691  |
| YNL187W | YNL187W | 1.275938178  | -1.55180505  | 1.070263689  | 1.449927776  |
| KAR1    | YNL188W | -1.17357517  | -1.684452921 | -1.587320013 | -1.061193022 |
| SRP1    | YNL189W | 1.204681336  | -1.264256373 | -1.479080827 | 1.169921592  |
| YNL190W | YNL190W | 1.106002646  | -1.817176362 | -1.992677959 | 1.096579286  |
| YNL191W | YNL191W | -1.240195149 | -1.831615331 | -1.326546724 | -1.380739403 |
| CHS1    | YNL192W | 1.140785133  | -1.492162447 | 1.312270792  | 1.137084248  |
| YNL193W | YNL193W | -1.208467783 | -1.4354627   | 1.6491242    | -1.148845038 |
| YNL194C | YNL194C | 1.1333767    | 37.96212591  | 40.97873411  | -1.079463627 |
| YNL195C | YNL195C | -1.004847262 | 13.79550559  | 15.31308644  | -1.110005453 |
| WHI3    | YNL197C | 1.298432763  | -1.340940084 | -1.031986497 | 1.38383206   |
| GCR2    | YNL199C | -1.117262365 | -1.194064023 | -1.110749611 | -1.075007375 |
| YNL200C | YNL200C | 1.291378453  | 7.216469041  | 5.328109127  | 1.354414647  |
| PSY2    | YNL201C | -1.042784958 | -1.413702808 | -1.220675801 | -1.158131264 |
| SPS19   | YNL202W | 1.019244759  | 2.997277671  | 3.193981975  | -1.065627655 |
| YNL203C | YNL203C | 1.333923639  | -1.471948759 | -1.515237691 | 1.029409265  |
| SPS18   | YNL204C | 1.037184213  | -1.931816153 | -1.95304087  | 1.010986924  |
| YNL205C | YNL205C | 1.134435429  | -1.195012168 | -1.22323612  | 1.02361813   |
| RTT106  | YNL206C | -1.033628941 | -1.574517683 | -1.709317923 | 1.085613672  |
| RIO2    | YNL207W | -1.037243908 | -4.708232868 | -5.663078095 | 1.202803314  |
| YNL208W | YNL208W | -1.104338673 | -1.702080007 | 2.212738588  | -1.300020317 |
| SSB2    | YNL209W | -1.130215224 | -18.78192633 | -16.70425113 | -1.124380027 |
| YNL211C | YNL211C | 1.049809754  | -2.09032768  | -2.195504463 | 1.050315932  |
| VID27   | YNL212W | -1.075194266 | -1.083899648 | -1.134575557 | 1.046753322  |
| YNL213C | YNL213C | -1.28359101  | -1.510926784 | -1.234136629 | -1.224278373 |
| PEX17   | YNL214W | -1.16430921  | -1.285287506 | 1.169472846  | 1.099031509  |
| IES2    | YNL215W | -1.141105445 | -1.133414958 | 1.50118226   | -1.324477191 |
| RAP1    | YNL216W | 1.035662033  | -1.768198169 | -1.591481293 | -1.111039241 |
| YNL217W | YNL217W | -1.304434161 | -4.166166692 | -3.533462058 | -1.179060826 |
| MGS1    | YNL218W | -1.051146572 | -1.819246978 | -1.599260925 | -1.137554823 |
| ALG9    | YNL219C | 1.201564653  | -1.335133653 | -1.682572887 | 1.260228055  |

|         |         |              |              |              |              |
|---------|---------|--------------|--------------|--------------|--------------|
| ADE12   | YNL220W | -1.062351508 | -2.329334254 | -2.266103787 | -1.027902723 |
| POP1    | YNL221C | -1.026622474 | -2.558073748 | -2.39513083  | -1.068030905 |
| SSU72   | YNL222W | -1.065927232 | -1.536636086 | -1.594564528 | 1.037698218  |
| AUT2    | YNL223W | -1.33924642  | -1.648809273 | 2.359172332  | -1.430833979 |
| YNL224C | YNL224C | 1.009042099  | -1.405327035 | 1.146944421  | 1.225279104  |
| CNM67   | YNL225C | -1.192316228 | -1.039077147 | 1.001002469  | 1.038036548  |
| YNL227C | YNL227C | -1.439072925 | -4.529259014 | -2.770725737 | -1.634683272 |
| URE2    | YNL229C | -1.191190029 | -1.394891049 | -1.215986307 | -1.147127266 |
| ELA1    | YNL230C | -1.002229327 | -1.182596653 | 1.222851472  | -1.034039348 |
| PDR16   | YNL231C | -1.260035172 | -1.438001522 | -1.285232744 | -1.118864679 |
| CSL4    | YNL232W | -1.133963947 | -2.388005141 | -2.575216919 | 1.078396723  |
| BNI4    | YNL233W | -1.013135051 | -1.341716504 | -1.344554676 | 1.002115329  |
| YNL234W | YNL234W | 1.036883592  | -1.245820636 | -1.042687497 | -1.194816893 |
| SIN4    | YNL236W | -1.015223391 | -1.103534768 | -1.103094233 | -1.000399363 |
| YTP1    | YNL237W | -1.08144161  | 5.707165873  | 5.400091916  | 1.05686458   |
| KEX2    | YNL238W | 1.065282582  | -1.18772473  | 1.024364309  | -1.216662823 |
| LAP3    | YNL239W | 1.224220464  | -1.574046552 | 1.474333602  | 1.067632556  |
| NAR1    | YNL240C | 1.015765317  | -2.3161189   | -1.981764252 | -1.168715651 |
| ZWF1    | YNL241C | 1.330176515  | 2.379234146  | 1.972486077  | 1.20621087   |
| APG2    | YNL242W | 1.008158697  | 2.626171853  | 3.092709124  | -1.177649178 |
| SLA2    | YNL243W | -1.066287741 | -1.219465287 | 1.331101121  | -1.091544905 |
| SUI1    | YNL244C | -1.034635154 | -2.715448093 | -1.948392519 | -1.393686368 |
| CWC25   | YNL245C | 1.044899115  | -1.076951316 | 1.101111322  | -1.022433703 |
| VPS75   | YNL246W | 1.088443541  | -1.091817013 | -1.318259997 | 1.439298692  |
| YNL247W | YNL247W | -1.038499013 | -4.941138168 | -5.12450419  | 1.037110078  |
| RPA49   | YNL248C | -1.148522957 | -32.25704308 | -48.14226305 | 1.492457412  |
| MPA43   | YNL249C | -1.019215298 | -1.321139554 | -1.229357271 | -1.074658755 |
| RAD50   | YNL250W | -1.042096148 | -1.646315599 | 1.640096709  | 1.003791783  |
| NRD1    | YNL251C | 1.195938218  | -3.219947209 | -3.858285114 | 1.198244836  |
| MRPL17  | YNL252C | -1.164629462 | -1.299422782 | 1.284334933  | 1.011747597  |
| YNL253W | YNL253W | -1.155279688 | -1.591423718 | -1.308312097 | -1.21639456  |
| YNL254C | YNL254C | 1.01817352   | -2.463195149 | -1.832289623 | -1.34432631  |
| GIS2    | YNL255C | -1.181122316 | -6.10974242  | -3.898044511 | -1.56738652  |
| FOL1    | YNL256W | 1.057389838  | -3.607692682 | -4.187687339 | 1.160766092  |
| SIP3    | YNL257C | -1.097334251 | -1.274655798 | -1.366723565 | 1.072229512  |
| DSL1    | YNL258C | -1.043825665 | -1.016918207 | -1.187753527 | 1.207848186  |
| ATX1    | YNL259C | -1.141678099 | -1.913375656 | -1.290875423 | -1.482231067 |
| YNL260C | YNL260C | -1.16743664  | -1.188984016 | 1.258403545  | -1.058385587 |
| ORC5    | YNL261W | 1.103645585  | -1.528626827 | -2.091096486 | 1.367957469  |
| POL2    | YNL262W | -1.028932581 | -2.474519495 | -1.975868975 | -1.252370236 |
| YIF1    | YNL263C | 1.278098866  | -1.045623295 | -1.050162829 | 1.098074718  |
| PDR17   | YNL264C | -1.156301748 | -1.219354378 | 1.192283504  | 1.022705065  |
| IST1    | YNL265C | -1.249522022 | -1.599737994 | 1.863852007  | -1.165098294 |
| PIK1    | YNL267W | -1.009660949 | -1.173358226 | 1.093526859  | 1.073003572  |
| LYP1    | YNL268W | 1.318815319  | -1.149049122 | -1.742931207 | 1.516846558  |
| ALP1    | YNL270C | 1.081070356  | -1.096450182 | 1.074671616  | 1.020265322  |
| BNI1    | YNL271C | 1.082811154  | -1.07764176  | 1.040846487  | 1.035351297  |
| SEC2    | YNL272C | -1.046767188 | -1.196910834 | -1.255860469 | 1.049251484  |
| TOF1    | YNL273W | -1.022300096 | -2.059855069 | -1.801342844 | -1.14351084  |

|               |                |              |              |              |              |
|---------------|----------------|--------------|--------------|--------------|--------------|
| YNL274C       | YNL274C        | -1.151146766 | 18.40801074  | 21.72550051  | -1.180219896 |
| YNL275W       | YNL275W        | 1.229985935  | -1.840451966 | -2.006182787 | 1.090048979  |
| YNL276C       | YNL276C        | 1.045911082  | -1.754590303 | -1.2721359   | -1.379247535 |
| MET2          | YNL277W        | -1.21673696  | -1.780938383 | -1.63997242  | -1.085956301 |
| CAF120        | YNL278W        | 1.103964189  | -1.28337693  | -1.423961433 | 1.109542645  |
| PRM1          | YNL279W        | 1.280427383  | -2.946608342 | -4.783291116 | 1.623320972  |
| ERG24         | YNL280C        | -1.021699357 | -2.055742055 | -2.488086303 | 1.210310552  |
| HCH1          | YNL281W        | -1.124736455 | 3.993993085  | 4.283936199  | -1.072594796 |
| POP3          | YNL282W        | 1.028842167  | -1.95256561  | -2.199971182 | 1.126707943  |
| WSC2          | YNL283C        | 1.241041345  | -1.034994758 | -1.322750516 | 1.278026295  |
| MRPL10        | YNL284C        | -1.249717293 | -1.037668136 | 1.182016406  | -1.139108319 |
| YNL285W       | YNL285W        | -1.085506234 | -1.322205638 | 1.98981592   | -1.504921672 |
| CUS2          | YNL286W        | -1.064038783 | -1.060186996 | 1.232193706  | -1.16224186  |
| SEC21         | YNL287W        | 1.093669265  | -1.014787808 | -1.127313002 | 1.14398349   |
| CAF40         | YNL288W        | 1.343844341  | -1.029160583 | 1.033581724  | -1.06372157  |
| PCL1          | YNL289W        | -1.237604379 | -2.227103898 | -3.121072797 | 1.401404218  |
| RFC3          | YNL290W        | -1.017395231 | -1.195620476 | -1.197584918 | 1.001643031  |
| MID1          | YNL291C        | 1.22385004   | -1.438399563 | -1.904055873 | 1.323732238  |
| PUS4          | YNL292W        | -1.110011078 | -3.985989121 | -3.813891265 | -1.045123955 |
| MSB3          | YNL293W        | 1.004847362  | 2.669664841  | 2.58955999   | 1.030933769  |
| RIM21         | YNL294C        | -1.023006869 | -1.811224359 | 1.8325245    | -1.011760079 |
| YNL295W       | YNL295W        | 1.006027514  | -1.188787021 | 1.305382727  | -1.098079558 |
| MON2          | YNL297C        | 1.111539994  | -1.13160878  | -1.011135776 | 1.144210121  |
| CLA4          | YNL298W        | 1.192740591  | -1.143091657 | -1.387872902 | 1.214139648  |
| TRF5          | YNL299W        | 1.070972252  | -7.477236846 | -7.890113835 | 1.055217856  |
| YNL300W       | YNL300W        | 1.194567728  | -5.1232896   | -5.16530208  | 1.008200294  |
| RPL18B        | YNL301C        | 1.195570587  | -5.289189955 | -8.278766116 | 1.565223822  |
| <b>RPS19B</b> | <b>YNL302C</b> | -1.242342778 | -10.86559848 | -6.357274215 | -1.709159951 |
| YNL303W       | YNL303W        | -1.09633169  | -1.040080051 | 1.339250735  | -1.287641978 |
| YPT11         | YNL304W        | -1.121676575 | -1.123334114 | 1.338037032  | -1.191130061 |
| YNL305C       | YNL305C        | 1.280692424  | 4.691419621  | 4.592377228  | 1.021566694  |
| MRPS18        | YNL306W        | -1.195428672 | -1.189263593 | -1.003743351 | -1.184828364 |
| MCK1          | YNL307C        | 1.237741641  | -1.1351404   | -1.539654003 | 1.356355569  |
| KRI1          | YNL308C        | -1.166518776 | -8.756084043 | -7.719466835 | -1.134286114 |
| STB1          | YNL309W        | -1.012541964 | -1.557529313 | -1.471142921 | -1.058720597 |
| YNL310C       | YNL310C        | -1.439444859 | -1.092420028 | 1.77705042   | -1.62670985  |
| YNL311C       | YNL311C        | -1.140178325 | -1.804543037 | -1.839143321 | 1.019173987  |
| RFA2          | YNL312W        | -1.065072009 | -1.376664444 | -1.21631462  | -1.131832522 |
| YNL313C       | YNL313C        | 1.181375657  | -7.669641937 | -8.178969013 | 1.066408195  |
| DAL82         | YNL314W        | -1.376497687 | -1.065764477 | 1.669207048  | -1.566206309 |
| ATP11         | YNL315C        | -1.4395053   | -1.129156465 | 1.064639714  | -1.202144816 |
| PHA2          | YNL316C        | 1.155321495  | -1.39127044  | -1.231370821 | -1.129854968 |
| PFS2          | YNL317W        | -1.018418227 | -1.232887101 | 1.096621143  | 1.124259831  |
| YNL320W       | YNL320W        | 1.165699617  | -1.768381338 | 1.3690288    | 1.291704994  |
| YNL321W       | YNL321W        | 1.261128138  | -1.770989644 | 1.288319848  | 1.374650593  |
| KRE1          | YNL322C        | 1.03864209   | -1.686454473 | 2.178559942  | -1.291798846 |
| LEM3          | YNL323W        | -1.175006019 | -1.327291075 | -1.286372944 | -1.031808917 |
| FIG4          | YNL325C        | -1.06809759  | -1.112297858 | -1.06069736  | 1.179811401  |
| YNL326C       | YNL326C        | 1.002878056  | -1.085402266 | -1.148311499 | 1.057959371  |

|           |           |              |              |              |              |
|-----------|-----------|--------------|--------------|--------------|--------------|
| EGT2      | YNL327W   | 1.10991084   | -1.060311831 | -1.321179611 | 1.246029303  |
| PEX6      | YNL329C   | 1.104121504  | -1.138907222 | -1.050821446 | 1.196788133  |
| RPD3      | YNL330C   | -1.135009334 | -1.286505393 | 1.332187619  | -1.035508771 |
| AAD14     | YNL331C   | -1.116605192 | -1.090329571 | 1.274090296  | -1.168536862 |
| THI12     | YNL332W   | 1.138799402  | -1.025710681 | 1.695601936  | -1.739197016 |
| SNZ2      | YNL333W   | -1.501236052 | -1.88935161  | -1.095806278 | -1.724165711 |
| SNO2      | YNL334C   | -1.60158461  | -1.077884591 | 1.601215768  | -1.725925803 |
| COS1      | YNL336W   | 1.159792115  | -1.802918656 | 1.357660725  | 1.327959646  |
| YNL337W   | YNL337W   | 1.171776628  | -1.328692946 | -1.468174404 | 1.104976442  |
| YRF1-6    | YNL339C   | -1.049734237 | -1.092625113 | 1.172981227  | -1.281628746 |
| CIT1      | YNR001C   | 1.159549047  | 7.221187192  | 6.169516814  | 1.170462357  |
| FUN34     | YNR002C   | 1.050334235  | 8.265829667  | 8.212948113  | 1.006438803  |
| RPC34     | YNR003C   | -1.078674445 | -5.077827506 | -4.438927849 | -1.143931075 |
| YNR004W   | YNR004W   | -1.262135276 | -1.406396231 | 1.137719548  | -1.600084485 |
| VPS27     | YNR006W   | -1.265296609 | -1.393682023 | 1.599977347  | -1.148021802 |
| AUT1      | YNR007C   | -1.21651779  | -1.962517428 | 2.352946075  | -1.198942767 |
| LRO1      | YNR008W   | 1.340883943  | -1.529509958 | -1.018032649 | 1.557091075  |
| YNR009W   | YNR009W   | -1.003570092 | -2.250518047 | -2.337959466 | 1.038853908  |
| CSE2      | YNR010W   | -1.135161633 | -1.390492794 | 1.540245642  | -1.10769768  |
| PRP2      | YNR011C   | -1.00995969  | -1.021613137 | 1.12521386   | -1.149533261 |
| URK1      | YNR012W   | -1.072185869 | -15.13132871 | -12.56907661 | -1.203853646 |
| PHO91     | YNR013C   | 1.193788552  | -1.022527211 | -1.443559521 | 1.411756583  |
| YNR014W   | YNR014W   | 1.102223074  | 5.862892524  | 6.259093978  | -1.067577813 |
| SMM1      | YNR015W   | 1.0368979    | -2.846613308 | -3.525308698 | 1.238422054  |
| ACC1      | YNR016C   | 1.12974137   | -2.264403769 | -2.343945749 | 1.035127119  |
| MAS6      | YNR017W   | 1.149570241  | -1.374216692 | -2.084032856 | 1.516524191  |
| YNR018W   | YNR018W   | -1.179835352 | -1.539992959 | -1.061004048 | -1.451448712 |
| ARE2      | YNR019W   | 1.199197064  | 3.524289469  | 4.619901993  | -1.310874726 |
| YNR020C   | YNR020C   | 1.029230434  | -1.577524407 | -1.525257065 | -1.03426789  |
| YNR021W   | YNR021W   | 1.22020889   | -1.676158616 | -2.688541616 | 1.603989975  |
| YNR022C   | YNR022C   | -1.148324759 | -1.241843403 | 1.229399455  | -1.526721603 |
| SNF12     | YNR023W   | -1.011711514 | -1.030063138 | -1.000366936 | -1.029685309 |
| YNR024W   | YNR024W   | -1.162672744 | -3.939365845 | -3.000708987 | -1.312811692 |
| SEC12     | YNR026C   | -1.247495102 | -1.250587204 | 1.028369421  | -1.286065639 |
| BUD17     | YNR027W   | -1.10544491  | -1.778196081 | -1.613315744 | -1.10219967  |
| CPR8      | YNR028W   | 1.013213906  | -1.07193751  | -1.286626558 | 1.200281309  |
| YNR029C   | YNR029C   | 1.030851952  | -1.555052639 | -1.811790799 | 1.165099337  |
| ECM39     | YNR030W   | 1.362510535  | -1.511010681 | -1.025462364 | 1.549484586  |
| SSK2      | YNR031C   | 1.015686572  | -1.054567897 | -1.000245082 | 1.054826353  |
| HUB1      | YNR032C-A | -1.04819654  | -1.3978283   | 1.117889556  | -1.562617657 |
| PPG1      | YNR032W   | -1.08527908  | -1.245449897 | 1.382358727  | -1.109927207 |
| ABZ1      | YNR033W   | -1.095896818 | -1.699459027 | 1.825979704  | -1.074447619 |
| SOL1      | YNR034W   | 1.089413169  | 3.957452831  | 3.467275245  | 1.141372562  |
| YNR034W-A | YNR034W-A | -1.304742396 | 52.37317699  | 65.00652833  | -1.241217968 |
| ARC35     | YNR035C   | 1.080134041  | -1.902098631 | 1.824125929  | 1.042745241  |
| YNR036C   | YNR036C   | -1.212394788 | -1.059800344 | 1.848222106  | -1.743934239 |
| RSM19     | YNR037C   | -1.217532541 | -1.150226262 | 1.606696568  | -1.848064588 |
| DBP6      | YNR038W   | 1.017843903  | -5.88598648  | -6.828912644 | 1.160198493  |
| ZRG17     | YNR039C   | 1.194705384  | -1.086506314 | -1.301614229 | 1.414212078  |

|         |         |              |              |              |              |
|---------|---------|--------------|--------------|--------------|--------------|
| YNR040W | YNR040W | -1.255607775 | -1.069130727 | 1.07338778   | -1.003981789 |
| COQ2    | YNR041C | 1.258426202  | -1.043944827 | -1.291455214 | 1.237091444  |
| YNR042W | YNR042W | -1.102737061 | -1.973666609 | -1.249104943 | -1.580064686 |
| MVD1    | YNR043W | 1.010562923  | -2.226427462 | -2.172377157 | -1.024880719 |
| AGA1    | YNR044W | 1.396636242  | -4.74145528  | -5.759860668 | 1.214787513  |
| PET494  | YNR045W | 1.003243848  | -1.744860082 | 1.66871462   | 1.045631206  |
| YNR046W | YNR046W | 1.012896033  | -3.428314596 | -2.474407956 | -1.385509041 |
| YNR047W | YNR047W | 1.147421261  | 2.186679604  | 1.977546248  | 1.105753965  |
| YNR048W | YNR048W | -1.03591483  | -1.538492393 | -1.649871659 | 1.072395071  |
| MSO1    | YNR049C | -1.275676858 | -1.045276071 | 1.159627922  | -1.212131317 |
| LYS9    | YNR050C | 1.11685589   | -2.327316308 | -1.837573588 | -1.266515976 |
| BRE5    | YNR051C | 1.131515478  | -1.610042699 | -2.024075499 | 1.257156409  |
| POP2    | YNR052C | -1.027876345 | -1.227307296 | -1.532892555 | 1.248988383  |
| NOG2    | YNR053C | -1.030078598 | -22.81961009 | -17.52967103 | -1.301770585 |
| YNR054C | YNR054C | -1.055239267 | -8.884787717 | -14.46488162 | 1.628050335  |
| HOL1    | YNR055C | 1.15839004   | -1.091311449 | -1.214338121 | 1.325221093  |
| BIO5    | YNR056C | 1.010814956  | -1.556285469 | 1.069598859  | -1.664601163 |
| BIO4    | YNR057C | -1.067684585 | -1.005442278 | 1.139790633  | -1.133621152 |
| BIO3    | YNR058W | 1.207705836  | -1.456246138 | 1.348714643  | 1.079728871  |
| MNT4    | YNR059W | 1.114141677  | -1.125858554 | -1.279295168 | 1.136284094  |
| FRE4    | YNR060W | 1.43190366   | -1.136780763 | -1.327214712 | 1.167520384  |
| YNR061C | YNR061C | 1.436784761  | -1.622755421 | -2.415854724 | 1.48873619   |
| YNR062C | YNR062C | 1.469101734  | -1.428651381 | -1.390264929 | -1.02761089  |
| YSN1    | YNR065C | 1.100220483  | -1.295219407 | 1.164447888  | 1.112303453  |
| DSE4    | YNR067C | 1.286547231  | -1.935581227 | 1.260332456  | 1.535770358  |
| YNR068C | YNR068C | -1.365858481 | 3.883688614  | 5.163033994  | -1.329415025 |
| YNR071C | YNR071C | 1.137557132  | -1.228473533 | -1.241455261 | 1.010567365  |
| YNR073C | YNR073C | -1.293184921 | -1.118986611 | 1.887515298  | -1.686807759 |
| YNR074C | YNR074C | -1.150230492 | -1.526751011 | -1.500727249 | -1.017340768 |
| COS10   | YNR075W | 1.15126564   | -1.243584153 | -1.916315092 | 1.54096133   |
| PAU6    | YNR076W | 1.049662019  | -1.262663329 | -1.047035353 | -1.205941447 |
| YNR077C | YNR077C | 1.435949304  | -1.458273922 | -1.411840636 | -1.032888476 |
| PHO80   | YOL001W | 1.124815549  | -1.287940757 | -1.551169691 | 1.204379691  |
| YOL002C | YOL002C | 1.357013552  | -1.837390099 | -2.432870484 | 1.324090342  |
| YOL003C | YOL003C | 1.075240953  | -1.03795795  | -1.513465149 | 1.570913183  |
| SIN3    | YOL004W | 1.043945517  | -1.370367853 | 1.121459054  | 1.221950858  |
| RPB11   | YOL005C | -1.097616317 | -1.778040926 | -1.258662575 | -1.41264304  |
| TOP1    | YOL006C | -1.241248832 | -1.3793508   | -1.056659864 | -1.30538771  |
| YOL007C | YOL007C | 1.093316139  | -3.089984802 | -4.458187214 | 1.44278613   |
| YOL008W | YOL008W | 1.022190577  | -1.003545414 | 1.252738795  | -1.248313009 |
| MDM12   | YOL009C | -1.153329453 | -1.526993284 | 1.614837332  | -1.057527462 |
| RCL1    | YOL010W | -1.170186131 | -9.354836255 | -9.973775153 | 1.066162451  |
| PLB3    | YOL011W | 1.240616382  | -1.111519042 | -1.312986644 | 1.181254297  |
| HTZ1    | YOL012C | 1.081517513  | -1.566084895 | -1.367002464 | -1.145634288 |
| HRD1    | YOL013C | 1.042825659  | -1.905056417 | 1.788963998  | 1.064893659  |
| YOL014W | YOL014W | 1.125049003  | -1.251903477 | 1.400811495  | -1.118945287 |
| CMK2    | YOL016C | -1.244642621 | 3.101919856  | 4.089754881  | -1.318459235 |
| ESC8    | YOL017W | -1.198117214 | -2.320929509 | -1.889169804 | -1.228544678 |
| TLG2    | YOL018C | -1.335861357 | -1.344603164 | 1.107970482  | -1.489780616 |



|         |           |              |              |              |              |
|---------|-----------|--------------|--------------|--------------|--------------|
| YOL019W | YOL019W   | 1.192929187  | -1.517398145 | -2.165065199 | 1.426827366  |
| TAT2    | YOL020W   | 1.1642966    | -1.277187922 | -1.338840715 | 1.048272296  |
| DIS3    | YOL021C   | -1.062633108 | -2.302008456 | -2.327718816 | 1.011168664  |
| YOL022C | YOL022C   | -1.311455514 | -6.796971556 | -5.970480816 | -1.138429511 |
| IFM1    | YOL023W   | -1.256485939 | -1.415871686 | 1.585567998  | -1.11985289  |
| YOL024W | YOL024W   | 1.058843736  | -1.760031257 | -1.959225777 | 1.113176694  |
| LAG2    | YOL025W   | 1.07651362   | -1.672997527 | 1.736704363  | -1.038079456 |
| YOL026C | YOL026C   | -1.147754769 | -1.196327452 | 1.459742522  | -1.746330051 |
| YOL027C | YOL027C   | 1.11086111   | -2.032892643 | -2.094168478 | 1.03014219   |
| YAP7    | YOL028C   | 1.026553827  | -1.763921456 | -2.05604093  | 1.165607983  |
| YOL029C | YOL029C   | 1.042845896  | -1.862135982 | -1.900404645 | 1.02055095   |
| GAS5    | YOL030W   | 1.270867175  | -1.131570114 | -1.252015798 | 1.416743658  |
| YOL031C | YOL031C   | 1.014313897  | -1.950382432 | 1.605653885  | 1.214696673  |
| YOL032W | YOL032W   | -1.09511606  | 8.825839266  | 12.32397367  | -1.396351473 |
| MSE1    | YOL033W   | -1.075905845 | -1.382408142 | 1.303001777  | 1.060941103  |
| SMC5    | YOL034W   | -1.200671778 | -1.362513892 | -1.232531133 | -1.10546002  |
| YOL036W | YOL036W   | -1.03542668  | -1.608734145 | 1.845669769  | -1.147280783 |
| PRE6    | YOL038W   | -1.25702835  | -1.320122962 | 1.736157898  | -1.315148626 |
| RPP2A   | YOL039W   | 1.254960849  | -4.178657207 | -3.373202652 | -1.238780363 |
| RPS15   | YOL040C   | -1.027344189 | -7.117437306 | -4.945322888 | -1.439226005 |
| NOP12   | YOL041C   | -1.051662934 | -15.37322604 | -27.84682302 | 1.811384478  |
| NGL1    | YOL042W   | 1.198820122  | -1.266011226 | -1.148333242 | -1.102477208 |
| NTG2    | YOL043C   | -1.141545183 | -1.188570468 | 1.233233215  | -1.037576861 |
| PEX15   | YOL044W   | -1.268975738 | -1.238039864 | 1.126021887  | -1.394059983 |
| PSK2    | YOL045W   | -1.088506884 | -1.293193195 | -1.310592197 | 1.013454294  |
| YOL047C | YOL047C   | 1.10161437   | -1.854036362 | 1.477051815  | 1.255227707  |
| YOL048C | YOL048C   | 1.094011417  | 2.668470866  | 2.389802527  | 1.116607266  |
| GSH2    | YOL049W   | -1.407802224 | -1.443143176 | -1.089432819 | -1.324673858 |
| GAL11   | YOL051W   | 1.190624984  | -1.197684005 | -1.123424378 | 1.345507409  |
| SPE2    | YOL052C   | 1.111578881  | -1.666198433 | -1.548563731 | -1.075963746 |
| DDR2    | YOL052C-A | 1.427018419  | 32.94788494  | 47.63508967  | -1.44577079  |
| YOL053W | YOL053W   | -1.241529364 | -1.809901887 | 2.132170901  | -1.178058831 |
| YOL054W | YOL054W   | -1.124195133 | -2.189283051 | -2.042049032 | -1.072101119 |
| THI20   | YOL055C   | -1.174643257 | -1.66857496  | 1.868501181  | -1.119818543 |
| GPM3    | YOL056W   | -1.241914917 | -2.116511708 | -1.716182293 | -1.233267419 |
| YOL057W | YOL057W   | 1.069840818  | -1.09767316  | 1.131711142  | -1.031009214 |
| ARG1    | YOL058W   | 1.132390376  | -1.101553528 | 1.201738616  | -1.323779412 |
| GPD2    | YOL059W   | 1.033790176  | -1.032471324 | 1.054094837  | -1.020943452 |
| MAM3    | YOL060C   | 1.224928085  | 2.076556468  | 1.622136728  | 1.280136521  |
| PRS5    | YOL061W   | 1.040924871  | -3.031900526 | -3.013416392 | -1.006133946 |
| APM4    | YOL062C   | -1.005814734 | -1.237586129 | -1.189741617 | -1.040214205 |
| MOR1    | YOL063C   | -1.018024976 | -1.362674242 | 1.576798473  | -1.157135304 |
| MET22   | YOL064C   | 1.078095514  | -1.283579302 | -1.574461437 | 1.226617969  |
| INP54   | YOL065C   | -1.266251012 | -1.37263235  | 1.480115396  | -1.078304323 |
| RIB2    | YOL066C   | 1.016522139  | -1.173258342 | -1.022811404 | 1.200022012  |
| RTG1    | YOL067C   | -1.54999543  | -1.147494882 | 1.129252839  | -1.295811853 |
| HST1    | YOL068C   | -1.118503077 | -1.042018589 | -1.087122291 | 1.04328493   |
| NUF2    | YOL069W   | -1.120247657 | -1.200964323 | 1.072426807  | 1.11985668   |
| YOL070C | YOL070C   | -1.082356431 | -1.054088676 | -1.142305929 | 1.083690542  |

|           |           |              |              |              |              |
|-----------|-----------|--------------|--------------|--------------|--------------|
| EMI5      | YOL071W   | -1.161319663 | 2.355257727  | 2.514140609  | -1.067458809 |
| THP1      | YOL072W   | -1.109874624 | -1.247431133 | 1.337045458  | -1.071839096 |
| YOL073C   | YOL073C   | 1.057640746  | -1.910561057 | 1.678270014  | 1.138411007  |
| YOL075C   | YOL075C   | 1.02927415   | -1.206504573 | 1.331212934  | -1.103363356 |
| MDM20     | YOL076W   | -1.345475729 | -2.009791068 | -1.605890115 | -1.251512198 |
| BRX1      | YOL077C   | -1.103469105 | -85.03332069 | -69.27533322 | -1.227468952 |
| ATP19     | YOL077W-A | -1.046376413 | -1.538942267 | 1.426914065  | -2.195938365 |
| AVO1      | YOL078W   | -1.215002092 | -1.309970381 | -1.015838751 | -1.289545589 |
| REX4      | YOL080C   | -1.04827203  | -12.90213044 | -14.58310335 | 1.130286462  |
| IRA2      | YOL081W   | 1.187886035  | 6.359612316  | 7.556510903  | -1.188203074 |
| CVT19     | YOL082W   | -1.443289264 | 2.482860177  | 3.379521553  | -1.361140504 |
| YOL083W   | YOL083W   | -1.209523365 | 3.242079872  | 3.14584368   | 1.030591537  |
| PHM7      | YOL084W   | -1.6771451   | 48.1854367   | 49.81937674  | -1.033909417 |
| YOL086W-A | YOL086W-A | 1.133792519  | -1.13574648  | 1.284407557  | -1.130892836 |
| YOL087C   | YOL087C   | -1.001189135 | 2.368305056  | 2.142775251  | 1.105251265  |
| MPD2      | YOL088C   | -1.15220938  | -1.290178565 | 1.11889713   | 1.153080592  |
| HAL9      | YOL089C   | 1.043728186  | -1.074979915 | -1.134367946 | 1.219422758  |
| MSH2      | YOL090W   | -1.048949675 | -1.155173163 | 1.141456299  | 1.012016986  |
| YOL092W   | YOL092W   | 1.134343401  | -5.267813902 | -4.585115967 | -1.148894366 |
| YOL093W   | YOL093W   | -1.203105296 | -4.451460108 | -3.528858265 | -1.261444856 |
| RFC4      | YOL094C   | -1.05956622  | -1.694753729 | -1.631988851 | -1.038459134 |
| HMI1      | YOL095C   | -1.177638646 | -1.270743395 | -1.118158453 | -1.136460929 |
| COQ3      | YOL096C   | -1.046058599 | 2.763861925  | 2.603451221  | 1.061614638  |
| WRS1      | YOL097C   | -1.03013913  | -2.860095628 | -3.002281747 | 1.049713764  |
| YOL098C   | YOL098C   | 1.212043302  | -1.16416366  | -1.707783454 | 1.46696166   |
| PKH2      | YOL100W   | -1.17846605  | -1.662015421 | 1.805179438  | -1.086138801 |
| YOL101C   | YOL101C   | 1.100437532  | -2.899345848 | -2.789078791 | -1.039535297 |
| TPT1      | YOL102C   | -1.110084983 | -1.934929795 | -1.489720012 | -1.298854671 |
| ITR2      | YOL103W   | 1.037681791  | -1.870018268 | -2.17174576  | 1.161350024  |
| NDJ1      | YOL104C   | 1.009831602  | 2.029642052  | 2.484886992  | -1.224298141 |
| WSC3      | YOL105C   | 1.170732601  | -1.044970548 | 1.311369083  | -1.254934012 |
| YOL106W   | YOL106W   | -1.074050784 | -1.294338458 | 1.023231192  | -1.324407484 |
| YOL107W   | YOL107W   | 1.09608644   | -1.713740954 | 1.647725316  | 1.040064711  |
| INO4      | YOL108C   | -1.30310075  | -1.236614785 | 1.854529623  | -1.499682557 |
| YOL109W   | YOL109W   | -1.119576946 | -1.47835978  | -1.057793732 | -1.397587956 |
| SHR5      | YOL110W   | 1.054548426  | -1.35567198  | 1.409063905  | -1.039384103 |
| YOL111C   | YOL111C   | -1.112236153 | -1.240272977 | -1.025924528 | -1.208931986 |
| MSB4      | YOL112W   | -1.032479558 | -1.441206489 | -1.537676257 | 1.066936812  |
| SKM1      | YOL113W   | -1.213288072 | -1.460902517 | 1.725669062  | -1.181234916 |
| YOL114C   | YOL114C   | -1.157671039 | -1.024327138 | 1.042515584  | -1.067877004 |
| TRF4      | YOL115W   | 1.076725521  | -2.560258618 | -2.939069093 | 1.147957895  |
| MSN1      | YOL116W   | -1.232400978 | -1.252078044 | 1.547966123  | -1.236317601 |
| RR12      | YOL117W   | -1.024944382 | 3.262562438  | 3.614400841  | -1.107841125 |
| MCH4      | YOL119C   | 1.234856449  | -1.644565589 | 1.367930264  | 1.202229115  |
| RPL18A    | YOL120C   | 1.216393895  | -8.032436332 | -6.231014948 | -1.289105611 |
| RPS19A    | YOL121C   | -1.258028676 | -9.939439698 | -6.454641436 | -1.539890294 |
| SMF1      | YOL122C   | 1.229228507  | -1.581197067 | 1.101281927  | 1.435778639  |
| HRP1      | YOL123W   | -1.016461479 | -5.049808928 | -6.077342121 | 1.203479617  |
| YOL124C   | YOL124C   | -1.184691639 | -25.12795106 | -26.90394408 | 1.070677988  |

|           |           |              |              |              |              |
|-----------|-----------|--------------|--------------|--------------|--------------|
| YOL125W   | YOL125W   | -1.012131455 | -7.569001057 | -7.466266179 | -1.013759873 |
| MDH2      | YOL126C   | 1.078520677  | -1.682505003 | 1.549268758  | 1.085999439  |
| RPL25     | YOL127W   | -1.00199654  | -9.068848406 | -6.250960751 | -1.450792729 |
| YGK3      | YOL128C   | 1.287947039  | -2.286016469 | -3.507740533 | 1.534433623  |
| VPS68     | YOL129W   | 1.126555505  | -1.885165344 | 1.509315552  | 1.249020022  |
| ALR1      | YOL130W   | 1.193612013  | -1.716097266 | -2.067820428 | 1.204955261  |
| GAS4      | YOL132W   | 1.773084433  | -1.920645803 | -1.206655753 | 2.317558306  |
| HRT1      | YOL133W   | -1.115103379 | -1.284157968 | 1.427190609  | -1.111382434 |
| MED7      | YOL135C   | -1.186032254 | -1.021798873 | 1.08389582   | -1.107523528 |
| PFK27     | YOL136C   | 1.219198612  | -1.334963768 | -1.09601376  | 1.463138659  |
| YOL137W   | YOL137W   | 1.084278629  | -1.863775773 | -2.282027679 | 1.224411065  |
| YOL138C   | YOL138C   | -1.051143832 | -1.097396727 | -1.004071408 | -1.092946894 |
| CDC33     | YOL139C   | -1.202902166 | -5.072237435 | -4.633383888 | -1.094715559 |
| ARG8      | YOL140W   | 1.071794158  | -1.845386249 | -2.174149699 | 1.178154276  |
| RRP40     | YOL142W   | 1.086588216  | -3.137668012 | -2.694178261 | -1.164610397 |
| RIB4      | YOL143C   | -1.19774072  | -1.420412221 | -1.289707438 | -1.101344521 |
| NOP8      | YOL144W   | -1.246166537 | -11.92884204 | -11.76406893 | -1.014006473 |
| CTR9      | YOL145C   | -1.009844053 | -1.680301407 | -1.296154525 | -1.296374294 |
| YOL146W   | YOL146W   | -1.042199925 | -1.595293523 | 1.103311109  | -1.760105067 |
| PEX11     | YOL147C   | 1.019591563  | -1.767200877 | -1.846061023 | 1.044624325  |
| SPT20     | YOL148C   | -1.086609496 | -1.388764462 | 1.596520313  | -1.149597615 |
| DCP1      | YOL149W   | -1.252119778 | -2.543537866 | -2.344644195 | -1.084828936 |
| YOL150C   | YOL150C   | -1.084009571 | -1.060674541 | 2.104998574  | -1.984584804 |
| GRE2      | YOL151W   | 1.068920051  | 2.133582644  | 3.367728303  | -1.578438179 |
| FRE7      | YOL152W   | 1.329314211  | -1.669553536 | -2.724340985 | 1.631778154  |
| YOL153C   | YOL153C   | 1.189951587  | 13.43313379  | 13.64779459  | -1.015979949 |
| ZPS1      | YOL154W   | 1.058474779  | -1.107422742 | 1.037720898  | -1.149195723 |
| YOL155C   | YOL155C   | 1.384219869  | 4.843639927  | 4.532399618  | 1.068670094  |
| YOL157C   | YOL157C   | 1.180374491  | -1.385036183 | 1.379050445  | 1.004340478  |
| ENB1      | YOL158C   | 1.066548837  | -1.241341888 | 1.255506465  | -1.011410697 |
| YOL159C   | YOL159C   | 1.131584931  | -1.094000433 | 1.547201584  | -1.414260487 |
| YOL159C-A | YOL159C-A | -1.036432645 | -1.32986075  | 1.685324608  | -1.267294044 |
| YOL161C   | YOL161C   | 1.042197894  | -1.383339607 | -1.209143177 | -1.144066007 |
| YOL162W   | YOL162W   | 1.111520094  | -1.733852533 | 1.661301437  | 1.043671241  |
| YOL163W   | YOL163W   | -1.07925516  | -1.706630874 | 1.750476312  | -1.025691226 |
| YOL164W   | YOL164W   | -1.140873051 | -1.152200134 | -1.191173982 | 1.033825588  |
| AAD15     | YOL165C   | -1.100609135 | -1.935252294 | -1.658230232 | -1.167058866 |
| YOL166C   | YOL166C   | -1.222564035 | -4.389622069 | -2.275537841 | -1.929048152 |
| RRP6      | YOR001W   | -1.178452157 | -5.048257851 | -5.203470292 | 1.030745743  |
| ALG6      | YOR002W   | 1.127610694  | -1.095189514 | -1.455963537 | 1.32941698   |
| YSP3      | YOR003W   | -1.093490336 | 2.988714488  | 3.161025545  | -1.057653903 |
| YOR004W   | YOR004W   | -1.01797435  | -11.89060588 | -12.57017562 | 1.057151818  |
| DNL4      | YOR005C   | -1.189369728 | -1.88826431  | 2.484275188  | -1.31563954  |
| YOR006C   | YOR006C   | -1.20518944  | -2.833695162 | -2.443673429 | -1.159604687 |
| SGT2      | YOR007C   | -1.408638328 | -1.82796909  | 2.401917867  | -1.313981664 |
| SLG1      | YOR008C   | -1.047178894 | -1.665340061 | 1.703128642  | -1.02269121  |
| TIR4      | YOR009W   | -1.025650521 | -1.244523222 | -1.03683451  | -1.200310377 |
| TIR2      | YOR010C   | 1.138390585  | 2.10330727   | 2.244060417  | -1.066919917 |
| AUS1      | YOR011W   | 1.122314742  | -1.959407035 | -1.934665258 | -1.01278866  |

|         |         |              |              |              |              |
|---------|---------|--------------|--------------|--------------|--------------|
| YOR013W | YOR013W | -1.203585634 | -1.370308879 | 1.481008313  | -1.080784294 |
| RTS1    | YOR014W | 1.239518061  | -1.425663001 | 1.003217665  | 1.421090409  |
| YOR015W | YOR015W | 1.226100616  | -1.390598848 | 1.022712809  | 1.359715882  |
| ERP4    | YOR016C | 1.305520552  | -1.272886506 | -1.629085305 | 1.279835474  |
| PET127  | YOR017W | -1.132940151 | -1.234768991 | 1.103059317  | 1.119403981  |
| ROD1    | YOR018W | -1.133455259 | -1.526512591 | 1.800091512  | -1.179218253 |
| YOR019W | YOR019W | -1.341279125 | 2.247612862  | 3.690689278  | -1.642048478 |
| HSP10   | YOR020C | -1.210964072 | 2.659067153  | 7.762259012  | -2.919166221 |
| YOR021C | YOR021C | -1.176199773 | -4.63300655  | -4.188880414 | -1.106025021 |
| YOR022C | YOR022C | -1.104343767 | -1.717161119 | 1.70038436   | 1.009866493  |
| AHC1    | YOR023C | 1.118363712  | -1.551404302 | 1.683823109  | -1.085354158 |
| HST3    | YOR025W | 1.006534207  | -1.167992197 | 1.031366511  | 1.132470547  |
| BUB3    | YOR026W | -1.159428789 | -1.947297269 | -1.52758518  | -1.274755277 |
| STI1    | YOR027W | -1.139562208 | 7.848596708  | 13.2947691   | -1.693903967 |
| CIN5    | YOR028C | -1.149992058 | 3.708789184  | 3.551960771  | 1.044152632  |
| DFG16   | YOR030W | 1.213822948  | -1.442904819 | 1.024976651  | 1.407744087  |
| CRS5    | YOR031W | -1.033435792 | -1.15905363  | -1.065876789 | -1.087418023 |
| EXO1    | YOR033C | -1.124208134 | -1.031748943 | -1.020060952 | -1.011458131 |
| AKR2    | YOR034C | 1.081558318  | -1.12303505  | -1.485791755 | 1.32301459   |
| SHE4    | YOR035C | -1.077379269 | -1.938247619 | 1.82277991   | 1.063347039  |
| PEP12   | YOR036W | -1.300249894 | -1.838942177 | 2.083592186  | -1.133038446 |
| CYC2    | YOR037W | -1.158065059 | -1.302281969 | 1.254171275  | 1.038360545  |
| HIR2    | YOR038C | -1.043351007 | -1.479756462 | -1.446708308 | -1.022843688 |
| CKB2    | YOR039W | -1.203422226 | -1.343023207 | -1.304140449 | -1.029814854 |
| GLO4    | YOR040W | -1.382835025 | 3.546424182  | 2.353195426  | 1.50706743   |
| CUE5    | YOR042W | -1.233970964 | -1.707536605 | 2.593884688  | -1.51907999  |
| WHI2    | YOR043W | -1.074505657 | -1.103511645 | -1.160801001 | 1.051915496  |
| YOR044W | YOR044W | -1.083833439 | -1.070748197 | -1.184039848 | 1.105806063  |
| TOM6    | YOR045W | 1.218813814  | -1.825725535 | -1.67220289  | -1.091808623 |
| DBP5    | YOR046C | -1.066007631 | -1.905834573 | -2.137668737 | 1.121644432  |
| STD1    | YOR047C | -1.0634962   | -1.504911669 | -1.63910438  | 1.089169826  |
| RAT1    | YOR048C | -1.043361015 | -3.324937919 | -3.48930954  | 1.049435997  |
| YOR049C | YOR049C | -1.187842621 | 2.205811205  | 2.479713507  | -1.12417305  |
| YOR051C | YOR051C | -1.138627899 | -4.32157687  | -4.242845247 | -1.018556327 |
| YOR052C | YOR052C | -1.202100413 | 4.960498075  | 6.966831096  | -1.40446201  |
| YOR054C | YOR054C | -1.066153291 | 2.77464225   | 3.268489201  | -1.177985811 |
| NOB1    | YOR056C | -1.194598504 | -13.45394402 | -12.17327091 | -1.105203697 |
| SGT1    | YOR057W | -1.175375839 | -1.16383456  | -1.232129759 | 1.058681192  |
| ASE1    | YOR058C | 1.033701447  | -1.013708139 | -1.021186844 | 1.035185416  |
| YOR059C | YOR059C | -1.109202711 | -1.982369104 | 2.077665235  | -1.04807184  |
| YOR060C | YOR060C | 1.172667382  | -1.354774976 | 1.235123064  | 1.096874486  |
| CKA2    | YOR061W | -1.196014754 | -1.679462364 | -1.453031307 | -1.155833571 |
| YOR062C | YOR062C | -1.397410395 | -1.602211073 | 1.848698822  | -1.153842245 |
| RPL3    | YOR063W | -1.35110954  | -5.045500946 | -4.238259019 | -1.190465454 |
| YNG1    | YOR064C | -1.038817675 | -1.114383683 | 1.081254368  | 1.030639705  |
| CYT1    | YOR065W | 1.189977453  | 2.85552221   | 2.1819558    | 1.308698466  |
| YOR066W | YOR066W | 1.074978378  | -1.187086371 | -1.132436947 | 1.344300465  |
| ALG8    | YOR067C | 1.166104283  | -1.911299539 | -2.104217562 | 1.100935526  |
| VPS5    | YOR069W | -1.103361681 | -1.39994678  | 1.339868327  | 1.044839073  |

|         |         |              |              |              |              |
|---------|---------|--------------|--------------|--------------|--------------|
| GYP1    | YOR070C | -1.0412822   | -1.517030593 | 1.453258622  | 1.043882052  |
| YOR071C | YOR071C | 1.136132964  | -1.120471326 | -1.091578243 | 1.223082121  |
| YOR072W | YOR072W | -1.022855704 | -1.077848989 | 1.027709336  | 1.048787776  |
| YOR073W | YOR073W | -1.234812395 | -1.748374817 | -1.556715266 | -1.123117923 |
| CDC21   | YOR074C | -1.110843383 | -1.660202768 | -1.66870527  | 1.005121364  |
| UFE1    | YOR075W | -1.18012346  | -1.323709379 | 1.258711782  | 1.05163819   |
| SKI7    | YOR076C | -1.047651103 | -1.171325058 | 1.053553274  | 1.111785314  |
| RTS2    | YOR077W | -1.23793274  | -1.24884502  | -1.154621587 | -1.081605467 |
| BUD21   | YOR078W | -1.299803685 | -4.388987771 | -3.348916764 | -1.310569381 |
| ATX2    | YOR079C | 1.154210264  | -1.651683586 | -1.876517062 | 1.136123818  |
| DIA2    | YOR080W | -1.11003928  | -1.813703864 | -1.661921685 | -1.091329321 |
| YOR081C | YOR081C | 1.227218655  | -1.434470321 | 1.190119612  | 1.205316093  |
| WHI5    | YOR083W | 1.287578409  | -1.286628093 | -1.196090713 | 1.538923913  |
| YOR084W | YOR084W | 1.1885636    | -1.21410106  | 1.097583285  | 1.106158481  |
| OST3    | YOR085W | 1.080386992  | -1.258875187 | -1.353548545 | 1.075204722  |
| YOR086C | YOR086C | 1.036684969  | -1.526047118 | 1.294039969  | 1.179289013  |
| YVC1    | YOR087W | 1.30706804   | -1.266245828 | -1.15246451  | 1.459303378  |
| YOR088W | YOR088W | 1.085092643  | -1.184555132 | 1.101377579  | 1.075521379  |
| VPS21   | YOR089C | -1.228682283 | -1.301892917 | 1.572477089  | -1.207839038 |
| PTC5    | YOR090C | -1.408004297 | -1.363804514 | 1.555544051  | -1.140591658 |
| YOR091W | YOR091W | -1.211239368 | -6.945883499 | -6.639513225 | -1.046143484 |
| ECM3    | YOR092W | 1.07239428   | -1.260648925 | 1.125780512  | 1.119799918  |
| YOR093C | YOR093C | -1.090426682 | -1.681861411 | -1.499974347 | -1.121260116 |
| ARF3    | YOR094W | -1.210141119 | -1.204304907 | -1.139996225 | -1.056411311 |
| RK11    | YOR095C | -1.165529645 | -33.44379866 | -25.17173595 | -1.328625039 |
| RPS7A   | YOR096W | 1.106900814  | -9.926251562 | -7.974644955 | -1.244726457 |
| YOR097C | YOR097C | -1.179945857 | -1.659381655 | 1.61277048   | 1.028901307  |
| NUP1    | YOR098C | 1.131173852  | -2.083863455 | -2.383497247 | 1.143787632  |
| KTR1    | YOR099W | 1.075705075  | -1.883354821 | -1.564229888 | -1.204014087 |
| CRC1    | YOR100C | -1.138346641 | 16.67695159  | 15.55064504  | 1.072428285  |
| RAS1    | YOR101W | -1.456522383 | -7.617983394 | -5.757971717 | -1.323032444 |
| OST2    | YOR103C | 1.105595853  | -1.672090483 | -1.164254515 | -1.43618982  |
| PIN2    | YOR104W | -1.167746644 | -1.148859437 | 1.000468373  | -1.149397532 |
| YOR105W | YOR105W | -1.243091242 | -1.090461926 | 1.157066829  | -1.061079531 |
| VAM3    | YOR106W | -1.216839395 | -1.396812578 | -1.679629716 | 1.202473218  |
| YOR108W | YOR108W | 1.143843593  | -13.72801783 | -15.55386203 | 1.133001299  |
| INP53   | YOR109W | 1.012736091  | -1.090198107 | 1.015521579  | 1.073535146  |
| TFC7    | YOR110W | -1.096398039 | -1.313001544 | 1.298448754  | 1.011207827  |
| YOR111W | YOR111W | -1.043687616 | -1.053385557 | -1.203111191 | 1.142137541  |
| YOR112W | YOR112W | -1.101442279 | -1.035396951 | 1.002253964  | -1.037730699 |
| AZF1    | YOR113W | -1.146976697 | -1.968027392 | 2.421608923  | -1.230475212 |
| YOR114W | YOR114W | -1.563897399 | -1.234301151 | 1.863142022  | -1.509471186 |
| TRS33   | YOR115C | -1.242995633 | -1.391382943 | -1.477630414 | 1.061986868  |
| RPO31   | YOR116C | 1.227401406  | -3.702668113 | -4.004485455 | 1.081513474  |
| RPT5    | YOR117W | -1.143596364 | -1.061956653 | 1.013411432  | 1.047902776  |
| YOR118W | YOR118W | -1.161457643 | -1.197482169 | -1.178142038 | -1.016415789 |
| RIO1    | YOR119C | 1.060087013  | -2.311017478 | -2.058125714 | -1.12287479  |
| GCY1    | YOR120W | -1.168172899 | 13.23531392  | 18.9497854   | -1.431759421 |
| YOR121C | YOR121C | -1.352884345 | 2.096340988  | 3.484957118  | -1.662399934 |

|         |         |              |              |              |              |
|---------|---------|--------------|--------------|--------------|--------------|
| PFY1    | YOR122C | -1.095761061 | -1.187828438 | 1.010209774  | -1.199955898 |
| LEO1    | YOR123C | -1.094586894 | -1.286445488 | -1.282405284 | -1.003150489 |
| UBP2    | YOR124C | 1.060994956  | 2.114299832  | 1.513613895  | 1.396855459  |
| CAT5    | YOR125C | -1.390844528 | -1.059136983 | 1.460273771  | -1.378739289 |
| IAH1    | YOR126C | 1.00996407   | -1.27229535  | -1.238013125 | -1.027691326 |
| RGA1    | YOR127W | -1.068945891 | -1.250765034 | -1.423526603 | 1.13812472   |
| ADE2    | YOR128C | -1.05384565  | -1.29162697  | 1.251265895  | 1.032256194  |
| YOR129C | YOR129C | 1.104100047  | -1.60175834  | -2.219441494 | 1.38562818   |
| ORT1    | YOR130C | -1.349121861 | -1.038271908 | 1.234024197  | -1.281252658 |
| YOR131C | YOR131C | -1.078261113 | -1.129008407 | 1.515810322  | -1.34260322  |
| VPS17   | YOR132W | -1.104260494 | -1.863372891 | 1.986526669  | -1.066091859 |
| EFT1    | YOR133W | -1.021026767 | -3.880393949 | -3.546189953 | -1.094243117 |
| BAG7    | YOR134W | 1.553104032  | 7.427396269  | 6.774619899  | 1.096356161  |
| YOR135C | YOR135C | -1.117378086 | -1.665246547 | 2.537436736  | -1.523760395 |
| IDH2    | YOR136W | 1.04381502   | 3.354579041  | 3.171366335  | 1.057770906  |
| SIA1    | YOR137C | 1.173491168  | 3.012278917  | 2.363547155  | 1.274473797  |
| YOR138C | YOR138C | -1.185915338 | -1.256668058 | 1.484378144  | -1.181201459 |
| YOR139C | YOR139C | 1.068175225  | -1.076540153 | 1.433716634  | -1.331781847 |
| SFL1    | YOR140W | 1.071729471  | -1.227969556 | -1.483778779 | 1.208318864  |
| ARP8    | YOR141C | -1.00222327  | -1.212975991 | 1.112759631  | 1.090061102  |
| LSC1    | YOR142W | 1.097614422  | -1.124741205 | 1.017571582  | 1.105319002  |
| THI80   | YOR143C | -1.131454513 | -2.753799997 | -2.567684783 | -1.072483669 |
| ELG1    | YOR144C | -1.05372623  | -1.773633886 | -2.178252369 | 1.228129653  |
| YOR145C | YOR145C | -1.193453229 | -14.05073171 | -14.48459272 | 1.030878179  |
| YOR147W | YOR147W | -1.159791179 | -1.023373252 | 1.046106219  | -1.022213759 |
| SPP2    | YOR148C | 1.064793015  | -1.374146135 | -1.227281939 | -1.119666225 |
| SMP3    | YOR149C | 1.13191617   | -1.377267434 | -1.836733722 | 1.333607167  |
| MRPL23  | YOR150W | -1.048449417 | -1.075517349 | 1.500640932  | -1.395273571 |
| RPB2    | YOR151C | -1.036963478 | -1.35459014  | -1.27747605  | -1.060364411 |
| YOR152C | YOR152C | -1.090289837 | 2.450144549  | 1.902290443  | 1.287997086  |
| PDR5    | YOR153W | 1.11005276   | -1.34272025  | -1.012584812 | -1.326032382 |
| YOR154W | YOR154W | -1.096583958 | -2.161525426 | -2.167021148 | 1.00254252   |
| YOR155C | YOR155C | -1.009848657 | -1.959207688 | 1.901546234  | 1.030323456  |
| NFI1    | YOR156C | 1.068432731  | -1.363777398 | 1.280230087  | 1.065259606  |
| PUP1    | YOR157C | -1.145660546 | -1.076005603 | 1.178664394  | -1.095407301 |
| PET123  | YOR158W | -1.277632858 | -1.313854651 | 1.433970983  | -1.091422847 |
| SME1    | YOR159C | 1.035058294  | -1.794699695 | -1.160803719 | -1.546083689 |
| MTR10   | YOR160W | 1.195717652  | -1.331038037 | 1.176685008  | 1.131176167  |
| YOR161C | YOR161C | 1.434682688  | 16.66960772  | 12.4570142   | 1.338170404  |
| YRR1    | YOR162C | 1.065548124  | -1.97679237  | 1.71348395   | 1.153668449  |
| DDP1    | YOR163W | -1.260737677 | -1.155109128 | 1.259455849  | -1.090334946 |
| YOR164C | YOR164C | 1.116979383  | -1.009973509 | -1.379368901 | 1.393126049  |
| YOR165W | YOR165W | -1.061669851 | -1.705444061 | -2.062000802 | 1.209069737  |
| YOR166C | YOR166C | -1.204237387 | -6.454182096 | -2.0538039   | -3.142550316 |
| RPS28A  | YOR167C | 1.090002583  | -5.947056807 | -3.155864285 | -1.88444631  |
| GLN4    | YOR168W | -1.1178001   | -3.154201719 | -2.993905783 | -1.053540742 |
| YOR169C | YOR169C | -1.196148515 | -2.212317864 | -1.650894748 | -1.340072023 |
| LCB4    | YOR171C | -1.14866525  | -1.120155578 | 1.089903233  | 1.027756909  |
| YOR172W | YOR172W | 1.018324315  | -1.17884181  | 1.199350573  | -1.017397383 |

|         |         |              |              |              |              |
|---------|---------|--------------|--------------|--------------|--------------|
| YOR173W | YOR173W | -1.285990795 | 24.098696    | 29.09043358  | -1.207137248 |
| MED4    | YOR174W | -1.027316839 | -1.530007581 | -1.560836596 | 1.020149583  |
| YOR175C | YOR175C | 1.123933353  | -1.277779347 | -1.728308087 | 1.352587277  |
| HEM15   | YOR176W | 1.211753502  | -1.645906519 | 1.605666523  | 1.025061241  |
| GAC1    | YOR178C | -1.853893429 | 22.3958393   | 113.6378283  | -5.07405982  |
| YOR179C | YOR179C | -1.132854744 | -1.124729977 | 1.29346227   | -1.150020268 |
| DCI1    | YOR180C | -1.071015334 | -1.017141892 | -1.129038097 | 1.110010418  |
| LAS17   | YOR181W | 1.123866165  | -1.662549237 | 1.766693664  | -1.06264141  |
| RPS30B  | YOR182C | 1.165914822  | -5.599339993 | -5.787615562 | 1.0336246    |
| SER1    | YOR184W | -1.126816804 | -1.957976137 | -2.325511485 | 1.187711863  |
| GSP2    | YOR185C | -1.028617742 | 3.248003164  | 3.263204725  | -1.004680279 |
| YOR186W | YOR186W | -1.000736307 | 2.089223474  | 2.518196107  | -1.205326351 |
| TUF1    | YOR187W | 1.115058572  | -1.460674458 | 1.249169016  | 1.169316912  |
| MSB1    | YOR188W | -1.002101739 | -2.305890047 | -2.734950438 | 1.186071487  |
| IES4    | YOR189W | -1.090099969 | -1.058498847 | 1.013916601  | 1.043970328  |
| SPR1    | YOR190W | -1.260593685 | -1.000107323 | -1.079697263 | 1.079813139  |
| RIS1    | YOR191W | 1.00669475   | -1.350023687 | 1.43201449   | -1.060732862 |
| YOR192C | YOR192C | 1.097676462  | -1.042677618 | -1.008940592 | -1.03343807  |
| YOR193W | YOR193W | -1.528600628 | -1.063163735 | -1.063204499 | 1.130360466  |
| TOA1    | YOR194C | -1.221368862 | -1.15696545  | 1.076154863  | -1.245073995 |
| SLK19   | YOR195W | -1.110594034 | -1.453811343 | -1.701161823 | 1.170139325  |
| LIP5    | YOR196C | -1.224798582 | -1.551747504 | -1.386083481 | -1.119519513 |
| MCA1    | YOR197W | -1.272243765 | -1.664120256 | -1.105553122 | -1.505237715 |
| BFR1    | YOR198C | -1.26774827  | -1.940283422 | -1.176043034 | -1.649840495 |
| PET56   | YOR201C | -1.156956941 | -1.465412146 | -1.595215536 | 1.088578077  |
| YOR203W | YOR203W | -1.497139244 | -3.216907819 | -1.660771524 | -1.936996013 |
| DED1    | YOR204W | 1.3793401    | -1.403887188 | -1.566849915 | 1.116079645  |
| YOR205C | YOR205C | -1.10070509  | -1.682589568 | -1.596770335 | -1.053745508 |
| NOC2    | YOR206W | -1.028436779 | -45.03708936 | -43.69188716 | -1.030788375 |
| RET1    | YOR207C | 1.016685528  | -4.616167065 | -4.08167322  | -1.130949691 |
| PTP2    | YOR208W | -1.022754727 | 2.231693281  | 2.245664722  | -1.006260466 |
| NPT1    | YOR209C | -1.30641057  | -2.138228856 | -1.756410061 | -1.217385907 |
| RPB10   | YOR210W | -1.285590834 | -3.58145787  | -3.04616824  | -1.175725563 |
| MGM1    | YOR211C | -1.185990161 | -1.060112525 | -1.102013028 | 1.168257814  |
| STE4    | YOR212W | -1.172508406 | -2.543748556 | -3.459991316 | 1.360193918  |
| SAS5    | YOR213C | 1.124847536  | -3.001870057 | -2.041199262 | -1.470640379 |
| YOR215C | YOR215C | -1.161554439 | 2.043842202  | 2.206210233  | -1.079442548 |
| RUD3    | YOR216C | -1.134590788 | -1.101886261 | -1.016959472 | -1.083510496 |
| RFC1    | YOR217W | 1.056157833  | -1.310147926 | -1.451535709 | 1.107917419  |
| STE13   | YOR219C | -1.038137643 | -1.5212346   | 1.284293883  | 1.184491042  |
| YOR220W | YOR220W | -1.178907483 | 3.872672086  | 4.903528928  | -1.266187485 |
| MCT1    | YOR221C | -1.061316203 | -1.927487244 | 2.039473947  | -1.058099841 |
| ODC2    | YOR222W | -1.039969642 | -3.093522393 | -2.887228097 | -1.07145064  |
| YOR223W | YOR223W | 1.030549446  | -1.591968114 | 2.062880328  | -1.295805053 |
| RPB8    | YOR224C | 1.218533543  | -4.654670131 | -4.287541496 | -1.085626842 |
| ISU2    | YOR226C | -1.158110812 | -1.461258797 | -1.326294701 | -1.101760262 |
| YOR227W | YOR227W | 1.148848663  | 2.480748812  | 2.106668446  | 1.177569644  |
| YOR228C | YOR228C | 1.238397907  | 3.111012417  | 2.238195838  | 1.389964347  |
| WTM2    | YOR229W | -1.113653945 | -2.499014849 | -2.341404829 | -1.067314297 |

|         |         |              |              |              |              |
|---------|---------|--------------|--------------|--------------|--------------|
| WTM1    | YOR230W | 1.007685369  | 2.426097196  | 2.670814511  | -1.100868719 |
| MKK1    | YOR231W | -1.073304144 | -1.295475585 | -1.47712816  | 1.140220763  |
| MGE1    | YOR232W | -1.16905221  | -2.130478931 | -2.658215467 | 1.247707935  |
| KIN4    | YOR233W | -1.169865692 | -2.12281129  | -2.302106786 | 1.084461344  |
| RPL33B  | YOR234C | 1.179044822  | -10.29326674 | -7.914212076 | -1.300605372 |
| DFR1    | YOR236W | -1.186967772 | -8.533098225 | -5.890825291 | -1.448540366 |
| HES1    | YOR237W | 1.059940279  | -2.691775281 | -3.032582792 | 1.126610685  |
| YOR238W | YOR238W | -1.307463897 | -1.027580852 | -1.003107841 | -1.024397188 |
| ABP140  | YOR239W | -1.00059206  | -1.926066868 | -1.490186884 | -1.292500215 |
| MET7    | YOR241W | -1.351611405 | -1.49956219  | -1.322580279 | -1.133815628 |
| SSP2    | YOR242C | -1.060523307 | -1.966038413 | -2.088897146 | 1.062490505  |
| YOR243C | YOR243C | 1.054222109  | -8.2250377   | -12.90407433 | 1.568877226  |
| ESA1    | YOR244W | -1.268620561 | -1.155228654 | 1.189041633  | -1.029269511 |
| DGA1    | YOR245C | 1.115632889  | 2.150334322  | 1.776481415  | 1.210445718  |
| YOR246C | YOR246C | 1.038133803  | -2.398118043 | -2.598316998 | 1.083481694  |
| SRL1    | YOR247W | 1.523352514  | -2.622578581 | -3.353405697 | 1.278667385  |
| YOR248W | YOR248W | 1.147593544  | -2.592635379 | -2.084859385 | -1.243554072 |
| APC5    | YOR249C | -1.361960186 | -1.09985513  | 1.224797115  | -1.113598585 |
| CLP1    | YOR250C | -1.001273937 | -1.295298685 | 1.384123031  | -1.068574412 |
| YOR251C | YOR251C | 1.07644636   | -1.748156314 | -1.663477101 | -1.050904946 |
| YOR252W | YOR252W | -1.205228548 | -2.361053133 | -2.322145919 | -1.016754853 |
| ARD2    | YOR253W | -1.283906344 | -2.2750646   | -1.537929493 | -1.479303577 |
| SEC63   | YOR254C | -1.226183853 | -1.492688217 | -1.728564993 | 1.158021463  |
| YOR256C | YOR256C | -1.023490487 | -1.318517339 | 1.30752747   | 1.008405077  |
| CDC31   | YOR257W | -1.206104859 | -1.11943797  | 1.412851962  | -1.262108308 |
| HNT3    | YOR258W | -1.028026104 | -1.029466171 | 1.089597513  | -1.121703779 |
| RPT4    | YOR259C | 1.042571765  | -1.359607383 | 1.175498739  | 1.156621728  |
| GCD1    | YOR260W | 1.033408427  | -2.895049918 | -2.812672701 | -1.029287879 |
| RPN8    | YOR261C | -1.1319954   | -1.219467741 | 1.344453289  | -1.102491886 |
| YOR262W | YOR262W | -1.148719249 | -2.042281845 | -1.839191585 | -1.110423656 |
| DSE3    | YOR264W | -1.11865519  | -1.458267013 | 1.11242218   | 1.310893508  |
| RBL2    | YOR265W | -1.217633535 | -1.290610222 | -1.126974835 | -1.145198795 |
| PNT1    | YOR266W | -1.480545693 | -1.253125081 | -1.047557204 | -1.196235467 |
| HRK1    | YOR267C | -1.016783971 | 2.840654883  | 2.977778141  | -1.048271706 |
| PAC1    | YOR269W | 1.137537746  | -1.814236366 | -2.175570604 | 1.199166021  |
| VPH1    | YOR270C | 1.297600826  | -1.05963229  | -1.564019141 | 1.657285183  |
| YOR271C | YOR271C | 1.040714419  | -4.426394766 | -4.064178846 | -1.089124011 |
| YTM1    | YOR272W | -1.160744228 | -30.1735978  | -42.143507   | 1.396701424  |
| TPO4    | YOR273C | 1.1612925    | 8.432730428  | 7.95340458   | 1.060266751  |
| MOD5    | YOR274W | -1.108134544 | -1.756003901 | -1.544011484 | -1.137299767 |
| RIM20   | YOR275C | -1.135943801 | -1.694925303 | 1.508775359  | 1.12337817   |
| CAF20   | YOR276W | -1.20871385  | -4.082187311 | -3.255131521 | -1.254077534 |
| YOR277C | YOR277C | -1.276077402 | -3.19146569  | -1.645713776 | -1.939259267 |
| HEM4    | YOR278W | -1.14513254  | -1.479496467 | -1.230415626 | -1.202436342 |
| RFM1    | YOR279C | -1.062131161 | -1.146236176 | 1.10228994   | 1.039868128  |
| FSH3    | YOR280C | -1.116012247 | -1.129410316 | -1.188797045 | 1.052582068  |
| PLP2    | YOR281C | -1.384741993 | -1.882822495 | -1.458221885 | -1.291176956 |
| YOR282W | YOR282W | 1.061228975  | -1.107714026 | -1.707233623 | 1.891126632  |
| YOR283W | YOR283W | -1.306069517 | -2.378698877 | -2.227979488 | -1.067648463 |



|           |           |              |              |              |              |
|-----------|-----------|--------------|--------------|--------------|--------------|
| YOR284W   | YOR284W   | -1.52670552  | -1.869591501 | -1.367627815 | -1.367032376 |
| YOR285W   | YOR285W   | 1.067044711  | 2.731278569  | 2.652387568  | 1.029743391  |
| YOR286W   | YOR286W   | -1.270359759 | -1.231294286 | 1.185146916  | -1.459264626 |
| YOR287C   | YOR287C   | -1.042815796 | -6.06756464  | -7.711830288 | 1.270992688  |
| MPD1      | YOR288C   | 1.042932571  | 3.410471016  | 3.220834235  | 1.058878156  |
| YOR289W   | YOR289W   | -1.48766402  | 6.63986295   | 9.312229572  | -1.40247316  |
| SNF2      | YOR290C   | 1.061066978  | -1.278485626 | 1.231630112  | 1.038043494  |
| YOR291W   | YOR291W   | 1.062132543  | -1.136476273 | 1.121814886  | 1.013069347  |
| YOR292C   | YOR292C   | 1.128776141  | 2.668591869  | 2.770057486  | -1.038022156 |
| RPS10A    | YOR293W   | -1.226871113 | -13.37489487 | -7.299583548 | -1.832281907 |
| RRS1      | YOR294W   | -1.192491402 | -21.4969604  | -26.71152315 | 1.242572095  |
| UAF30     | YOR295W   | -1.541734754 | -2.583860395 | -2.969139841 | 1.149110008  |
| YOR296W   | YOR296W   | 1.02917768   | -1.126062289 | -1.272905809 | 1.433371229  |
| TIM18     | YOR297C   | 1.155200804  | -1.38977968  | -1.896419192 | 1.36454664   |
| MBF1      | YOR298C-A | -1.296877901 | 2.291944164  | 4.085068515  | -1.782359526 |
| BUD7      | YOR299W   | -1.110323005 | -1.520220299 | 1.767421661  | -1.162608908 |
| YOR300W   | YOR300W   | -1.071149576 | -1.215829491 | -1.001568839 | -1.213925038 |
| RAX1      | YOR301W   | 1.068219591  | -1.232462922 | 1.071398172  | 1.150331365  |
| YOR302W   | YOR302W   | 1.322581476  | -1.948873579 | -2.488143138 | 1.276708333  |
| CPA1      | YOR303W   | 1.275166227  | -1.054264991 | -1.216128562 | 1.282121768  |
| YOR304C-A | YOR304C-A | -1.109094655 | -2.143796121 | -1.223576087 | -1.752074222 |
| ISW2      | YOR304W   | -1.152321311 | -1.305312488 | -1.168799383 | -1.116797722 |
| YOR305W   | YOR305W   | -1.130577943 | -1.78580235  | -1.620094443 | -1.102282869 |
| MCH5      | YOR306C   | 1.131046273  | -2.603521412 | -2.10538377  | -1.236601825 |
| SLY41     | YOR307C   | 1.106291623  | -1.104770139 | -1.084161036 | 1.197748739  |
| SNU66     | YOR308C   | 1.140255765  | -1.536150286 | -1.735011853 | 1.1294545    |
| YOR309C   | YOR309C   | 1.066634178  | -36.74905775 | -49.53843822 | 1.348019276  |
| NOP58     | YOR310C   | 1.053370567  | -18.89558753 | -26.00060476 | 1.376014623  |
| HSD1      | YOR311C   | 1.126256859  | -1.382438874 | -1.508637617 | 1.091287034  |
| RPL20B    | YOR312C   | -1.010400705 | -12.71039439 | -9.674662327 | -1.313781708 |
| SPS4      | YOR313C   | 1.025572542  | -3.133863949 | -3.706052819 | 1.182582551  |
| YOR315W   | YOR315W   | -1.072928726 | -15.75062906 | -19.49999299 | 1.238045345  |
| COT1      | YOR316C   | 1.135431597  | -1.330139493 | 1.410557151  | -1.060458063 |
| FAA1      | YOR317W   | 1.103277523  | 8.189128283  | 6.228726881  | 1.314735489  |
| YOR318C   | YOR318C   | -1.062203812 | -1.467454646 | -1.375726616 | -1.06667606  |
| HSH49     | YOR319W   | -1.266418285 | -1.273708726 | -1.072172712 | -1.187969729 |
| GNT1      | YOR320C   | -1.328346732 | -1.405759479 | -1.422101455 | 1.011625017  |
| PMT3      | YOR321W   | 1.19790406   | -1.373927204 | -1.023354415 | 1.406014471  |
| YOR322C   | YOR322C   | 1.014852744  | -1.120955144 | 1.089399713  | 1.02896589   |
| PRO2      | YOR323C   | -1.144896687 | -1.372646856 | -1.193626381 | -1.149980328 |
| YOR324C   | YOR324C   | -1.097421236 | -2.01716596  | -1.228337024 | -1.642192591 |
| MYO2      | YOR326W   | 1.051223751  | -1.605933958 | -1.660324774 | 1.033868651  |
| SNC2      | YOR327C   | -1.304469436 | -1.118454957 | 1.336202179  | -1.194685733 |
| PDR10     | YOR328W   | 1.131580017  | 2.085376177  | 2.060947296  | 1.011853228  |
| SCD5      | YOR329C   | -1.053116766 | -1.099955826 | 1.217066529  | -1.106468551 |
| MIP1      | YOR330C   | -1.01724048  | -1.107250367 | 1.137660896  | -1.259675444 |
| YOR331C   | YOR331C   | -1.582574399 | -1.593455539 | 1.388683124  | -2.212804814 |
| VMA4      | YOR332W   | -1.265659925 | -1.13774901  | 1.115461536  | -1.269115259 |
| MRS2      | YOR334W   | -1.055918559 | -1.048306105 | -1.093908875 | 1.043501388  |

|         |         |              |              |              |              |
|---------|---------|--------------|--------------|--------------|--------------|
| ALA1    | YOR335C | 1.194497857  | -5.370318162 | -8.097111126 | 1.507752592  |
| KRE5    | YOR336W | 1.096376413  | -1.047653216 | -1.112277109 | 1.16528069   |
| TEA1    | YOR337W | 1.105260109  | -1.832983321 | -2.52653616  | 1.378373786  |
| YOR338W | YOR338W | -1.392658845 | -1.043431798 | 1.07334806   | -1.028671028 |
| RPA43   | YOR340C | 1.015170539  | -21.75739334 | -21.25613209 | -1.023581959 |
| RPA190  | YOR341W | 1.195425984  | -34.64373712 | -30.01226332 | -1.154319378 |
| YOR342C | YOR342C | -1.053971177 | -4.238756093 | -7.101367578 | 1.675342346  |
| YOR343C | YOR343C | 1.173545406  | -1.32425227  | 1.04896534   | 1.262436631  |
| TYE7    | YOR344C | 1.085531571  | -1.264117536 | -1.302307621 | 1.030210865  |
| REV1    | YOR346W | 1.083232387  | -2.592083463 | -2.614711581 | 1.008729703  |
| PYK2    | YOR347C | 1.04770232   | 5.413546349  | 6.16642318   | -1.13907276  |
| PUT4    | YOR348C | 1.255770101  | 3.199580869  | 1.885530285  | 1.696913009  |
| CIN1    | YOR349W | 1.199781629  | -1.028829689 | -1.483007407 | 1.52576205   |
| MNE1    | YOR350C | 1.172507954  | -1.430765255 | 1.145167526  | 1.249393842  |
| YOR352W | YOR352W | -1.227452071 | -1.719825409 | 1.806426993  | -1.050354869 |
| YOR353C | YOR353C | -1.061746674 | -1.094911513 | 1.08028046   | 1.013543754  |
| MSC6    | YOR354C | -1.168432357 | -1.197141276 | -1.334312156 | 1.114582033  |
| GDS1    | YOR355W | 1.235205645  | -3.329734731 | -5.718666043 | 1.717453943  |
| YOR356W | YOR356W | -1.057657929 | -1.102953043 | -1.083217478 | 1.194738013  |
| GRD19   | YOR357C | -1.15995106  | -1.569372046 | 1.853703006  | -1.181174987 |
| HAP5    | YOR358W | -1.170722748 | -1.816965899 | 2.262017162  | -1.244942002 |
| VTS1    | YOR359W | 1.282212823  | -4.315634724 | -7.007709246 | 1.623795732  |
| PDE2    | YOR360C | 1.373645193  | -1.291891274 | -1.272556383 | 1.644004488  |
| PRT1    | YOR361C | 1.092501072  | -3.925215763 | -4.591674716 | 1.169789126  |
| PRE10   | YOR362C | -1.135120341 | -1.353803982 | 1.1098014    | 1.219861483  |
| PIP2    | YOR363C | 1.066486692  | -1.603492735 | 1.348314343  | 1.189257345  |
| YOR366W | YOR366W | -1.098140755 | -1.118569297 | -1.429598531 | 1.278059871  |
| SCP1    | YOR367W | -1.419855487 | -1.503312702 | 1.712159618  | -1.138924467 |
| RAD17   | YOR368W | -1.17522186  | -1.074348202 | -1.160894726 | 1.080557237  |
| RPS12   | YOR369C | -1.047937381 | -6.759357273 | -3.30606508  | -2.04453243  |
| MRS6    | YOR370C | -1.096039871 | -1.588858311 | -1.585231726 | -1.002287732 |
| GPB1    | YOR371C | 1.002486593  | -1.001977549 | -1.109879804 | 1.107689294  |
| NDD1    | YOR372C | -1.118230579 | -1.030707064 | -1.105834364 | 1.139791291  |
| NUD1    | YOR373W | 1.070495849  | -1.261999753 | -1.758557973 | 1.393469347  |
| ALD4    | YOR374W | 1.100152476  | 20.3124589   | 23.63511125  | -1.163577062 |
| GDH1    | YOR375C | 1.0162243    | -1.688778768 | -1.735265946 | 1.027527098  |
| ATF1    | YOR377W | -1.022038659 | -1.129480582 | 1.035473511  | 1.090786553  |
| YOR378W | YOR378W | 1.06377824   | -1.926037763 | 1.763826434  | 1.091965586  |
| RDR1    | YOR380W | -1.006293826 | -1.519395483 | 1.802124732  | -1.18608009  |
| FRE3    | YOR381W | 1.229114298  | -1.780131744 | 1.405064476  | 1.266939542  |
| FIT2    | YOR382W | -1.307500048 | -1.589483262 | 2.708178266  | -1.703810497 |
| FIT3    | YOR383C | -1.727043469 | -1.222357296 | 1.809729799  | -1.480524396 |
| FRE5    | YOR384W | -1.095596665 | -1.165604942 | 1.302236287  | -1.117219256 |
| YOR385W | YOR385W | -1.091638126 | -1.495257349 | 1.407915478  | 1.062036302  |
| PHR1    | YOR386W | -1.215904125 | 7.455449126  | 7.084302895  | 1.052389944  |
| YOR389W | YOR389W | 1.000885003  | -1.067680928 | -1.048311816 | 1.119262533  |
| YOR390W | YOR390W | 1.129447527  | -1.884234835 | -3.026128839 | 1.606025312  |
| YOR391C | YOR391C | -1.161096937 | 2.368088273  | 2.442326213  | -1.031349313 |
| ERR1    | YOR393W | 1.185634376  | 5.231713965  | 5.641795426  | -1.078383769 |

|         |         |              |              |              |              |
|---------|---------|--------------|--------------|--------------|--------------|
| YOR394W | YOR394W | 1.009306979  | -1.285001779 | 1.47105797   | -1.144790609 |
| YOR396W | YOR396W | -1.064493876 | -1.03072871  | 1.224437476  | -1.26206286  |
| HAT1    | YPL001W | -1.027139908 | -1.098571754 | -1.385121989 | 1.260838888  |
| SNF8    | YPL002C | 1.004191068  | -1.0399842   | -1.026371644 | 1.067410293  |
| ULA1    | YPL003W | -1.075290552 | 2.526076137  | 2.602624285  | -1.030303183 |
| YPL004C | YPL004C | -1.007767481 | 3.527245596  | 4.130692646  | -1.171081664 |
| YPL005W | YPL005W | -1.147566735 | -1.549968274 | 1.761405483  | -2.730122617 |
| NCR1    | YPL006W | 1.250420042  | 2.060159726  | 1.555737532  | 1.32423348   |
| TFC8    | YPL007C | -1.292688548 | -1.008005108 | 1.047951267  | -1.05634023  |
| CHL1    | YPL008W | -1.072971194 | -1.788906987 | -1.505414871 | -1.188314943 |
| YPL009C | YPL009C | 1.092191989  | -1.132148568 | -1.067286981 | 1.208327427  |
| RET3    | YPL010W | 1.386944122  | -1.10304084  | -1.681344131 | 1.854591242  |
| TAF3    | YPL011C | -1.169708446 | -1.149284946 | -1.307804928 | 1.137929225  |
| RRP12   | YPL012W | 1.096686819  | -39.2545857  | -50.39168933 | 1.283714716  |
| YPL013C | YPL013C | -1.301774234 | -1.909900502 | -1.446028153 | -1.320790677 |
| YPL014W | YPL014W | 1.276656933  | 2.779093671  | 2.163496709  | 1.28453797   |
| HST2    | YPL015C | 1.386503224  | -1.812357187 | 1.258971556  | 1.439553719  |
| SWI1    | YPL016W | 1.048992669  | -2.162326428 | -2.6406062   | 1.22118759   |
| YPL017C | YPL017C | -1.067022049 | 8.553514759  | 7.797237381  | 1.096992991  |
| CTF19   | YPL018W | 1.099016678  | -1.352534829 | -1.89465599  | 1.400818633  |
| VTC3    | YPL019C | -1.009776569 | -3.746767014 | -5.469028588 | 1.459666045  |
| ULP1    | YPL020C | -1.13420758  | -1.205601718 | -1.096434773 | -1.099565381 |
| RAD1    | YPL022W | 1.019632329  | -1.14182842  | 1.050201445  | 1.087247047  |
| MET12   | YPL023C | 1.096934385  | -1.039638085 | 1.02535286   | 1.013932009  |
| NCE4    | YPL024W | -1.100645109 | -1.254010875 | -1.402266597 | 1.118225228  |
| YPL025C | YPL025C | 1.192486687  | -1.306470734 | -1.088369927 | -1.200392166 |
| SKS1    | YPL026C | -1.10986122  | -1.467090652 | -1.871054009 | 1.275349963  |
| ERG10   | YPL028W | 1.046801423  | -1.764819642 | -1.711811107 | -1.030966345 |
| SUV3    | YPL029W | -1.284498185 | -1.375699004 | -1.083710333 | -1.26943424  |
| YPL030W | YPL030W | -1.026624991 | -3.288022674 | -4.880229249 | 1.484244403  |
| PHO85   | YPL031C | -1.127658772 | -1.402771417 | 1.436108366  | -1.023765061 |
| SVL3    | YPL032C | 1.061597392  | -1.942052791 | -1.731385617 | -1.12167548  |
| YPL034W | YPL034W | -1.275539381 | -1.269668406 | 1.157644449  | 1.09676888   |
| PMA2    | YPL036W | 1.449547783  | -1.704041502 | -2.756841203 | 1.617825153  |
| EGD1    | YPL037C | -1.177091341 | -2.678689888 | -1.908121651 | -1.403836012 |
| MET31   | YPL038W | -1.139749089 | -1.527762571 | -1.350483757 | -1.131270601 |
| YPL039W | YPL039W | -1.130430337 | -1.387162145 | -1.161496238 | -1.194288969 |
| ISM1    | YPL040C | -1.039713941 | -1.153943938 | -1.283026576 | 1.11186214   |
| YPL041C | YPL041C | 1.238793044  | -1.050017834 | -1.215287402 | 1.157396916  |
| SSN3    | YPL042C | 1.037103905  | -1.469427986 | 1.19347662   | 1.231216399  |
| NOP4    | YPL043W | -1.010785047 | -22.33644592 | -25.40216533 | 1.137251889  |
| YPL044C | YPL044C | 1.205301429  | -2.071401483 | -1.586140447 | -1.305938253 |
| VPS16   | YPL045W | 1.007155195  | -1.184220698 | -1.105015348 | 1.308582047  |
| ELC1    | YPL046C | -1.226374834 | -1.024171524 | 1.347378497  | -1.315578949 |
| YPL047W | YPL047W | 1.265091054  | -1.444184894 | -1.771181638 | 1.226423047  |
| CAM1    | YPL048W | 1.156456141  | -1.274875925 | 1.152601894  | 1.106085225  |
| DIG1    | YPL049C | -1.040669194 | -1.023193347 | 1.09817053   | -1.07327763  |
| MNN9    | YPL050C | -1.166321551 | -1.692522629 | -2.509158744 | 1.482496422  |
| ARL3    | YPL051W | -1.17384186  | -1.532708281 | -1.238796277 | -1.237256125 |

|         |         |              |              |              |              |
|---------|---------|--------------|--------------|--------------|--------------|
| YPL052W | YPL052W | -1.060547216 | -1.637832132 | -1.592125388 | -1.028708005 |
| KTR6    | YPL053C | -1.183974242 | -1.224475035 | -1.194912814 | -1.024740065 |
| LGE1    | YPL055C | -1.104753318 | -1.259966817 | 1.612328604  | -1.279659577 |
| YPL056C | YPL056C | -1.017171633 | -1.080574936 | -1.144943506 | 1.059568817  |
| SUR1    | YPL057C | 1.305435593  | -1.914768424 | 1.335984528  | 1.433226496  |
| PDR12   | YPL058C | 1.303731367  | -1.732814874 | 1.211869444  | 1.429869268  |
| GRX5    | YPL059W | 1.069413256  | -1.066184482 | 1.363650591  | -1.4539031   |
| LPE10   | YPL060W | -1.219904731 | -1.968676989 | 1.65681452   | 1.188230164  |
| ALD6    | YPL061W | -1.146137051 | -1.489237635 | 2.582616155  | -1.734186737 |
| YPL062W | YPL062W | 1.246001439  | -1.261191409 | 1.024361836  | 1.231197184  |
| YPL063W | YPL063W | -1.321859942 | -1.339739761 | -1.18731326  | -1.128379347 |
| CWC27   | YPL064C | -1.083995095 | -1.016968231 | -1.006093332 | -1.010809036 |
| VPS28   | YPL065W | -1.132389424 | -1.261546433 | 1.421365892  | -1.126685356 |
| YPL066W | YPL066W | -1.082374724 | -1.031799427 | -1.175603103 | 1.212986609  |
| YPL067C | YPL067C | -1.014318197 | -1.265277434 | 1.411832022  | -1.115828027 |
| YPL068C | YPL068C | -1.286326539 | -2.544725317 | -2.471423755 | -1.029659649 |
| BTS1    | YPL069C | -1.021387225 | -1.370546838 | -1.35763313  | -1.009511928 |
| YPL070W | YPL070W | -1.080589509 | -1.796599377 | 1.417440938  | 1.267495054  |
| YPL071C | YPL071C | -1.05320298  | -1.002852236 | 1.181642973  | -1.178282235 |
| UBP16   | YPL072W | -1.181805141 | -1.016526347 | -1.132655794 | 1.114241453  |
| YTA6    | YPL074W | 1.041163604  | -1.277802744 | 1.122440244  | 1.138414941  |
| GCR1    | YPL075W | -1.08831291  | -1.148061795 | 1.018108482  | 1.127641912  |
| GPI2    | YPL076W | 1.203729976  | -1.196068666 | -1.85680756  | 1.552425553  |
| YPL077C | YPL077C | -1.079844872 | -1.462854863 | 1.533131584  | -1.048040802 |
| ATP4    | YPL078C | -1.198854475 | -1.155983923 | 1.252063658  | -1.083115113 |
| RPL21B  | YPL079W | -1.40802341  | -24.41800998 | -12.87432725 | -1.896643568 |
| RPS9A   | YPL081W | -1.125077873 | -8.730186312 | -13.96344628 | 1.599444248  |
| MOT1    | YPL082C | 1.042246984  | -1.411840094 | -1.580326179 | 1.119337938  |
| SEN54   | YPL083C | -1.104524449 | -1.238183259 | -1.473484597 | 1.19003757   |
| BRO1    | YPL084W | -1.096990721 | 2.119606838  | 2.254242086  | -1.063518973 |
| SEC16   | YPL085W | 1.152713882  | -1.039411738 | -1.169039019 | 1.215112878  |
| ELP3    | YPL086C | -1.054914207 | -97.48193155 | -10.78383079 | -9.039638458 |
| YDC1    | YPL087W | 1.030328213  | 4.175536126  | 3.459413042  | 1.207007106  |
| YPL088W | YPL088W | -1.278198221 | -1.230261196 | 1.437281452  | -1.168273417 |
| RLM1    | YPL089C | -1.053172287 | -1.610267176 | 1.537682857  | 1.047203699  |
| RPS6A   | YPL090C | -1.36804414  | -10.73673765 | -10.03258666 | -1.070186386 |
| GLR1    | YPL091W | -1.188197436 | -1.086060584 | 1.165213785  | -1.07288102  |
| SSU1    | YPL092W | 1.077930419  | -1.022238433 | -1.176513261 | 1.202677073  |
| NOG1    | YPL093W | 1.039297016  | -54.21468937 | -82.65145271 | 1.524521374  |
| SEC62   | YPL094C | 1.044501469  | -1.946758398 | -1.631701568 | -1.193084836 |
| YPL095C | YPL095C | 1.158106242  | -1.070529409 | 1.167768182  | -1.090832417 |
| PNG1    | YPL096W | -1.151544328 | -1.531041651 | 1.589023583  | -1.037870904 |
| MSY1    | YPL097W | -1.434454133 | -1.508620223 | 2.199181615  | -1.457743693 |
| YPL098C | YPL098C | 1.107197135  | -1.095553139 | -1.03979991  | -1.05361919  |
| YPL099C | YPL099C | -1.177486868 | -1.130834873 | 1.443222785  | -1.276245383 |
| MAI1    | YPL100W | -1.10641104  | -1.918852555 | 1.892730427  | 1.013801293  |
| ELP4    | YPL101W | -1.094893247 | -2.522781827 | -2.242491057 | -1.124990808 |
| YPL103C | YPL103C | 1.022701478  | -1.413239755 | 1.11026142   | 1.272889186  |
| MSD1    | YPL104W | -1.183650248 | -1.565502209 | 1.586544763  | -1.013441408 |

|         |         |              |              |               |              |
|---------|---------|--------------|--------------|---------------|--------------|
| YPL105C | YPL105C | 1.123848013  | -1.054888506 | -1.538952239  | 1.458876679  |
| SSE1    | YPL106C | 1.006392655  | 2.873200793  | 4.034225161   | -1.404087445 |
| YPL107W | YPL107W | -1.079307195 | -1.145476809 | -1.055788694  | 1.209381464  |
| YPL108W | YPL108W | -1.281704843 | -3.738515556 | -2.363722817  | -1.581621809 |
| YPL109C | YPL109C | 1.210270029  | 2.242868862  | 1.68799755    | 1.32871571   |
| YPL110C | YPL110C | -1.096441007 | -1.039108768 | 1.271147911   | -1.223305923 |
| CAR1    | YPL111W | 1.056486712  | -1.967895979 | 2.79754948    | -1.421594185 |
| PEX25   | YPL112C | -1.190981119 | -1.460850864 | -1.566295917  | 1.072180574  |
| YPL113C | YPL113C | -1.507315356 | 2.024739647  | 2.540950807   | -1.25495187  |
| BEM3    | YPL115C | 1.105618304  | -1.154993882 | -1.087119094  | 1.255615902  |
| HOS3    | YPL116W | -1.016768739 | -1.498029092 | 1.409025982   | 1.063166407  |
| IDI1    | YPL117C | -1.231259547 | -2.483650765 | -2.344652824  | -1.059282952 |
| MRP51   | YPL118W | -1.09600953  | -1.212658712 | 1.139479111   | 1.064221977  |
| DBP1    | YPL119C | 1.072038371  | 3.433477103  | 3.532256657   | -1.028769539 |
| VPS30   | YPL120W | -1.271553736 | -1.648001719 | 1.75209415    | -1.063162818 |
| TFB2    | YPL122C | -1.206219563 | -2.093411641 | -2.211572708  | 1.056444258  |
| RNY1    | YPL123C | -1.305948978 | 5.516832261  | 7.510873788   | -1.361446829 |
| SPC29   | YPL124W | -1.068263102 | -1.049394515 | -1.010687856  | 1.060610292  |
| KAP120  | YPL125W | 1.127180174  | -1.445509931 | -2.221059043  | 1.536522852  |
| NAN1    | YPL126W | 1.026118162  | -15.44721013 | -18.37928416  | 1.18981253   |
| HHO1    | YPL127C | -58.12112389 | -59.52039646 | -1.267896742  | -46.94419859 |
| TBF1    | YPL128C | 1.18886943   | -1.217538467 | -1.953624073  | 1.604568665  |
| TAF14   | YPL129W | -1.154181908 | -1.647140938 | -1.63111764   | -1.009823509 |
| SPO19   | YPL130W | 1.412335355  | -4.858821321 | -7.979885074  | 1.642349975  |
| RPL5    | YPL131W | -1.247963479 | -7.243006678 | -5.334711457  | -1.357712922 |
| COX11   | YPL132W | -1.313524626 | -1.052238548 | 1.034207675   | -1.088233183 |
| RDS2    | YPL133C | -1.130120046 | -1.089720209 | 1.155898042   | -1.060729196 |
| ODC1    | YPL134C | 1.013742082  | -1.282513354 | 1.335995067   | -1.041700706 |
| ISU1    | YPL135W | 1.209618559  | 2.124553436  | 1.652289662   | 1.285823839  |
| YPL136W | YPL136W | 1.183923429  | -1.74334398  | 2.200107916   | -1.262004482 |
| YPL137C | YPL137C | 1.216423925  | -1.135474739 | -1.101153332  | 1.250331793  |
| SPP1    | YPL138C | -1.271361647 | -1.019699178 | 1.020447989   | -1.000734345 |
| UME1    | YPL139C | -1.092306124 | -1.259536138 | -1.459360874  | 1.158649466  |
| MKK2    | YPL140C | -1.01770427  | -1.02172211  | -1.296896535  | 1.269324137  |
| YPL141C | YPL141C | -1.114430369 | -1.01318611  | -1.068204976  | 1.054302823  |
| YPL142C | YPL142C | 1.31801606   | -5.27303419  | -4.638595159  | -1.13677396  |
| RPL33A  | YPL143W | 1.127071339  | -9.65397903  | -6.3111076648 | -1.52968813  |
| YPL144W | YPL144W | -1.092194233 | -3.234844399 | -2.709288249  | -1.193983106 |
| KES1    | YPL145C | 1.443143681  | -1.173021833 | -1.996732649  | 1.70221269   |
| YPL146C | YPL146C | -1.23064282  | -5.610459608 | -5.294098484  | -1.059757317 |
| PXA1    | YPL147W | -1.145405361 | 2.196749116  | 2.0897759     | 1.051188846  |
| PPT2    | YPL148C | -1.06597449  | -1.230546399 | 1.338452036   | -1.087689206 |
| APG5    | YPL149W | 1.071696652  | -1.521674035 | -1.309499896  | -1.162026847 |
| YPL150W | YPL150W | -1.012130778 | 2.072506761  | 2.085507482   | -1.006272945 |
| PRP46   | YPL151C | -1.100387985 | -1.39641043  | 2.102140357   | -1.505388611 |
| RRD2    | YPL152W | 1.070426598  | 2.597768886  | 2.084005448   | 1.246526917  |
| RAD53   | YPL153C | 1.010601795  | -1.409478358 | -1.381885536  | -1.019967516 |
| PEP4    | YPL154C | 1.224926204  | 3.084092057  | 2.35368297    | 1.310326028  |
| KIP2    | YPL155C | -1.07843265  | -1.194326648 | -1.148476783  | 1.371656426  |

|           |           |              |              |              |              |
|-----------|-----------|--------------|--------------|--------------|--------------|
| PRM4      | YPL156C   | -1.130138496 | -1.481680959 | -1.595024995 | 1.076496925  |
| YPL157W   | YPL157W   | 1.033234947  | -1.78024126  | -2.315441946 | 1.300633795  |
| YPL158C   | YPL158C   | -1.104155084 | -1.634434069 | 1.414811365  | 1.155231086  |
| YPL159C   | YPL159C   | 1.117046706  | -1.658551741 | 1.347557402  | 1.230783741  |
| CDC60     | YPL160W   | 1.000872236  | -4.308739157 | -5.065543434 | 1.175644023  |
| BEM4      | YPL161C   | -1.155412263 | -1.020677477 | -1.048028647 | 1.069699235  |
| YPL162C   | YPL162C   | 1.233692646  | 2.203135786  | 1.976151692  | 1.114861675  |
| SVS1      | YPL163C   | 1.178856085  | -6.002016042 | -7.683817885 | 1.280206155  |
| MLH3      | YPL164C   | -1.119940182 | 2.137907491  | 1.826161122  | 1.170711316  |
| YPL166W   | YPL166W   | -1.152451269 | 3.344080683  | 2.658551164  | 1.257858314  |
| REV3      | YPL167C   | -1.29107136  | -1.17752717  | 1.538194524  | -1.306292171 |
| YPL168W   | YPL168W   | -1.212174786 | -1.674623351 | 1.568222157  | 1.067848291  |
| MEX67     | YPL169C   | -1.049123299 | -1.185222479 | 1.032266521  | 1.148174871  |
| YPL170W   | YPL170W   | 1.015681487  | -1.394075413 | 2.368975816  | -1.699316834 |
| OYE3      | YPL171C   | 1.188664303  | -1.210991593 | 2.463443136  | -2.034236364 |
| COX10     | YPL172C   | 1.058525673  | -1.146171143 | -1.11153673  | 1.274011324  |
| MRPL40    | YPL173W   | -1.11213278  | -1.231678274 | 1.149908722  | 1.071109602  |
| NIP100    | YPL174C   | 1.01782709   | -1.112181899 | -1.125935465 | 1.012366292  |
| SPT14     | YPL175W   | 1.006831994  | -1.650788353 | -1.576310948 | -1.047247915 |
| YPL176C   | YPL176C   | 1.045225305  | -1.863703729 | 1.56895548   | 1.187862723  |
| CUP9      | YPL177C   | -1.101833881 | -1.087282584 | -1.106672856 | 1.017833702  |
| CBC2      | YPL178W   | -1.201313389 | -1.826921035 | -1.591322727 | -1.148051871 |
| PPQ1      | YPL179W   | 1.188011367  | -1.238058151 | -1.47242637  | 1.189303077  |
| YPL180W   | YPL180W   | -1.079130174 | -1.2077802   | 1.190822758  | 1.014240106  |
| RXT1      | YPL181W   | 1.014109714  | -1.024887412 | -1.020579787 | 1.045979377  |
| YPL183C   | YPL183C   | 1.095263331  | -9.066747539 | -10.8007413  | 1.191247607  |
| YPL183W-A | YPL183W-A | 1.180051226  | -1.057275016 | -1.103628779 | 1.043842674  |
| YPL184C   | YPL184C   | 1.163550436  | -1.346298172 | -1.35246433  | 1.004580084  |
| UIP4      | YPL186C   | -1.238665198 | 27.71932701  | 25.05705652  | 1.106248333  |
| POS5      | YPL188W   | -1.119961083 | -1.144299164 | 1.103468382  | 1.037002222  |
| GUP2      | YPL189W   | -1.180101664 | -1.671156506 | -1.782084936 | 1.066378242  |
| NAB3      | YPL190C   | 1.112316787  | -1.234582567 | 1.157996213  | 1.066136964  |
| YPL191C   | YPL191C   | -1.069190149 | 2.105882032  | 1.683591929  | 1.250826875  |
| RSA1      | YPL193W   | 1.045590876  | -1.302195805 | -1.785308339 | 1.37099838   |
| DDC1      | YPL194W   | -1.058639609 | -1.290084494 | 1.233659107  | -1.591524484 |
| APL5      | YPL195W   | -1.078308331 | -1.087941071 | 1.048044021  | 1.038068105  |
| OXR1      | YPL196W   | -1.31264866  | 3.124406677  | 3.672227962  | -1.175336101 |
| YPL197C   | YPL197C   | 1.073416265  | -6.827669278 | -3.386292507 | -2.016266835 |
| RPL7B     | YPL198W   | -1.086908692 | -8.052398792 | -6.770803    | -1.189282687 |
| YPL199C   | YPL199C   | -1.231395173 | -2.442846943 | -2.07171207  | -1.179144041 |
| YPL201C   | YPL201C   | -1.010695379 | -2.970930321 | -2.752952092 | -1.079179812 |
| AFT2      | YPL202C   | -1.132079461 | -1.066171439 | -1.341837294 | 1.4306286    |
| TPK2      | YPL203W   | 1.093238795  | 3.399199174  | 2.853145984  | 1.191386348  |
| HRR25     | YPL204W   | -1.186800746 | -1.059650369 | 1.129617725  | -1.19699984  |
| YPL206C   | YPL206C   | 1.052491531  | 2.140831724  | 1.861185     | 1.150251976  |
| YPL207W   | YPL207W   | -1.001613471 | -6.687800491 | -7.260395466 | 1.085617832  |
| YPL208W   | YPL208W   | -1.059025365 | -1.312673835 | -1.024747605 | -1.280972825 |
| IPL1      | YPL209C   | -1.044947329 | -1.111913603 | 1.108612774  | 1.002977442  |
| SRP72     | YPL210C   | -1.012538949 | -1.296846727 | -1.793932552 | 1.38330345   |

|         |           |              |              |              |              |
|---------|-----------|--------------|--------------|--------------|--------------|
| NIP7    | YPL211W   | -1.170178109 | -63.88275542 | -69.17605527 | 1.082859605  |
| PUS1    | YPL212C   | 1.007098217  | -9.622538231 | -12.88759794 | 1.339313768  |
| LEA1    | YPL213W   | -1.295323432 | -1.047989204 | 1.03768622   | -1.087483956 |
| THI6    | YPL214C   | 1.010079802  | -1.216758238 | 1.178621492  | 1.032357077  |
| CBP3    | YPL215W   | -1.067575889 | -1.017746379 | -1.028418884 | 1.046669595  |
| YPL216W | YPL216W   | -1.21047913  | -1.424984812 | -1.488108537 | 1.044297823  |
| BMS1    | YPL217C   | 1.059374626  | -10.21469014 | -11.02176774 | 1.079011463  |
| SAR1    | YPL218W   | 1.225694758  | -1.363612412 | -1.214200711 | -1.123053544 |
| PCL8    | YPL219W   | 1.134879225  | -1.744263253 | 1.557746645  | 1.119734881  |
| RPL1A   | YPL220W   | 1.225725128  | -8.806273449 | -7.829113833 | -1.124811011 |
| BOP1    | YPL221W   | 1.134449893  | -1.432424737 | 1.225996165  | 1.168376197  |
| YPL222W | YPL222W   | -1.02441316  | 6.331931732  | 5.309026453  | 1.192672854  |
| GRE1    | YPL223C   | -1.138560336 | 4.875124518  | 5.627372049  | -1.154303244 |
| MMT2    | YPL224C   | -1.037416671 | 2.096423843  | 1.862035262  | 1.125877628  |
| YPL225W | YPL225W   | -1.135921206 | -1.487897606 | 1.610006753  | -1.082068246 |
| NEW1    | YPL226W   | 1.211453768  | -9.196404677 | -14.18684362 | 1.542651082  |
| ALG5    | YPL227C   | -1.133766191 | -2.313553999 | -3.398551759 | 1.46897447   |
| CET1    | YPL228W   | -1.093201589 | -1.098254319 | 1.084056777  | 1.013096678  |
| YPL229W | YPL229W   | 1.019265014  | -1.351516906 | 1.312448448  | 1.029767614  |
| YPL230W | YPL230W   | 1.213914664  | 15.69834996  | 14.07588561  | 1.115265526  |
| FAS2    | YPL231W   | 1.119063787  | -2.063396253 | -1.632161877 | -1.264210543 |
| SSO1    | YPL232W   | 1.013414506  | -1.208316184 | 1.088899298  | 1.10966752   |
| NSL1    | YPL233W   | -1.027817989 | -1.308423528 | -1.241456543 | -1.053942271 |
| TFP3    | YPL234C   | 1.108612582  | -1.764996821 | -1.128932415 | -1.563421156 |
| RVB2    | YPL235W   | -1.038877356 | -1.342169842 | -1.4692836   | 1.094707654  |
| YPL236C | YPL236C   | 1.133698284  | 2.230729022  | 1.915901102  | 1.16432368   |
| SUI3    | YPL237W   | -1.341923002 | -4.635428672 | -4.084226103 | -1.134958877 |
| YPL238C | YPL238C   | -1.244726656 | -1.470858897 | -1.58120114  | 1.075018918  |
| YAR1    | YPL239W   | -1.240200489 | -1.250249136 | 1.978907253  | -1.582810334 |
| HSP82   | YPL240C   | -1.021097187 | 19.0271076   | 36.80915751  | -1.934564006 |
| CIN2    | YPL241C   | 1.073935789  | -7.580253778 | -9.795140925 | 1.292191688  |
| IQG1    | YPL242C   | -1.097719367 | -1.00386276  | -1.030986614 | 1.034969067  |
| SRP68   | YPL243W   | -1.060530755 | -1.608563796 | -2.412232129 | 1.499618563  |
| HUT1    | YPL244C   | 1.147843988  | -1.498519898 | -1.838654705 | 1.226980508  |
| YPL245W | YPL245W   | -1.049519832 | -4.727894834 | -3.909355748 | -1.209379534 |
| YPL246C | YPL246C   | 1.040638392  | -1.656920935 | -1.989293593 | 1.200596571  |
| YPL247C | YPL247C   | 1.041572546  | 7.914755789  | 10.37137418  | -1.310384609 |
| GYP5    | YPL249C   | 1.019465152  | 2.321895813  | 2.366582674  | -1.019245851 |
| RPL36B  | YPL249C-A | -1.033570614 | -6.14613379  | -5.115915247 | -1.201375217 |
| ICY2    | YPL250C   | 1.036423159  | 3.226734386  | 9.531462559  | -2.953903672 |
| YAH1    | YPL252C   | 1.179910486  | -3.358886089 | -4.411639213 | 1.313423288  |
| VIK1    | YPL253C   | -1.038741827 | -1.172501504 | -1.34207395  | 1.144624503  |
| HFI1    | YPL254W   | -1.235956405 | -1.598386566 | -1.743990904 | 1.09109457   |
| BBP1    | YPL255W   | 1.003690926  | -1.899031662 | -1.944034401 | 1.02369773   |
| CLN2    | YPL256C   | 1.050868184  | -4.174959305 | -4.603912956 | 1.102744391  |
| YPL257W | YPL257W   | -1.000497212 | -1.465295982 | 2.043193689  | -1.394389744 |
| THI21   | YPL258C   | 1.128314136  | -1.031128144 | -1.069919082 | 1.103223677  |
| APM1    | YPL259C   | -1.085006236 | -1.177232055 | -1.186905382 | 1.00821701   |
| YPL260W | YPL260W   | -1.111248327 | -1.998003817 | 1.755628484  | 1.138056164  |

|           |           |              |              |              |              |
|-----------|-----------|--------------|--------------|--------------|--------------|
| FUM1      | YPL262W   | 1.025948919  | -1.487928136 | 1.699738351  | -1.14235245  |
| KEL3      | YPL263C   | -1.004784899 | -3.857100635 | -2.98505178  | -1.292138603 |
| YPL264C   | YPL264C   | 1.143184972  | 2.908127248  | 2.215520429  | 1.312615858  |
| DIP5      | YPL265W   | 1.194456041  | 3.185060818  | 1.826366883  | 1.743932638  |
| DIM1      | YPL266W   | -1.238274192 | -15.11153098 | -14.49091759 | -1.042827749 |
| YPL267W   | YPL267W   | -1.031787713 | -2.428412725 | -2.391947055 | -1.015245183 |
| PLC1      | YPL268W   | 1.048952402  | -1.002303636 | -1.239344627 | 1.242199626  |
| KAR9      | YPL269W   | 1.073859401  | -1.027291263 | -1.548574106 | 1.507434319  |
| MDL2      | YPL270W   | 1.078540597  | -1.485069499 | 1.155690291  | 1.285006469  |
| ATP15     | YPL271W   | 1.26949268   | -1.09019591  | 1.32235372   | -1.212950543 |
| YPL272C   | YPL272C   | 1.0351196    | -1.5124345   | -1.429234902 | -1.058212683 |
| SAM4      | YPL273W   | -1.150444925 | -4.607848851 | -4.347442428 | -1.059898763 |
| SAM3      | YPL274W   | 1.221674404  | -2.350953837 | -3.225438292 | 1.371970066  |
| YPL277C   | YPL277C   | -1.075762825 | -1.432421406 | 1.260845898  | 1.13607968   |
| YPL278C   | YPL278C   | -1.222590928 | -1.21658484  | 1.272787019  | -1.046196679 |
| YPL279C   | YPL279C   | 1.121089924  | -1.832543918 | -2.987064574 | 1.630009815  |
| YPL280W   | YPL280W   | -1.629853275 | 2.063157731  | 3.160165324  | -1.531712906 |
| ERR2      | YPL281C   | 1.111023849  | 5.428396228  | 4.488884591  | 1.209297347  |
| YPL282C   | YPL282C   | 1.047026211  | -1.249174819 | 1.460724009  | -1.169351147 |
| YRF1-7    | YPL283C   | -1.069614684 | -1.1018333   | 1.110459143  | -1.223540862 |
| CIT3      | YPR001W   | -1.004708845 | 3.047196433  | 2.329863741  | 1.307886113  |
| PDH1      | YPR002W   | -1.207859183 | 2.302491658  | 2.193182399  | 1.049840478  |
| YPR003C   | YPR003C   | -1.01420625  | -1.95850092  | 1.684132719  | 1.162913646  |
| YPR004C   | YPR004C   | 1.243815793  | -1.257982964 | -1.130330581 | 1.421936615  |
| HAL1      | YPR005C   | -1.127420337 | 2.818304065  | 2.444507222  | 1.152912963  |
| ICL2      | YPR006C   | -1.205440557 | -1.42244417  | 1.553970616  | -1.092465102 |
| HAA1      | YPR008W   | 1.155075555  | -1.841123139 | 1.440634087  | 1.277994985  |
| SUT2      | YPR009W   | -1.131661934 | -1.028261155 | 1.043228988  | -1.072711844 |
| RPA135    | YPR010C   | 1.178807702  | -21.6372591  | -22.31656972 | 1.031395411  |
| YPR011C   | YPR011C   | -1.027663471 | -1.066937501 | 1.134726987  | -1.210682775 |
| YPR013C   | YPR013C   | 1.04898511   | -1.26138258  | 1.100128511  | 1.146577484  |
| YPR015C   | YPR015C   | 1.095327147  | 2.033385709  | 2.033135215  | 1.000123205  |
| TIF6      | YPR016C   | 1.332050556  | -4.839517    | -5.060753061 | 1.045714492  |
| YPR016W-A | YPR016W-A | 2.340376206  | -4.159695706 | -2.882313861 | -1.443179302 |
| DSS4      | YPR017C   | -1.196293756 | -3.262310369 | -1.93935715  | -1.682160694 |
| RLF2      | YPR018W   | 1.095971466  | -1.277169952 | -1.582962275 | 1.239429625  |
| CDC54     | YPR019W   | 1.122842257  | -1.181053088 | -1.116573938 | 1.318733098  |
| ATP20     | YPR020W   | 1.022141908  | -1.913100509 | -1.43308348  | -1.33495399  |
| YPR021C   | YPR021C   | 1.02926098   | -1.198215119 | -1.122665269 | -1.067295081 |
| YPR022C   | YPR022C   | 1.004824352  | -1.227361318 | -1.456743113 | 1.186890193  |
| EAF3      | YPR023C   | -1.058070741 | -1.087749536 | -1.034940992 | 1.125756584  |
| YME1      | YPR024W   | -1.047687507 | 2.059440509  | 1.846995388  | 1.11502201   |
| CCL1      | YPR025C   | -1.265463078 | -1.123398565 | -1.078877987 | -1.041265629 |
| ATH1      | YPR026W   | -1.031944981 | 5.415406043  | 5.274549669  | 1.02670491   |
| YOP1      | YPR028W   | 1.292890298  | -1.933285213 | 1.831332811  | 1.05567115   |
| APL4      | YPR029C   | -1.026206261 | -1.085421566 | -1.28584225  | 1.395680908  |
| CSR2      | YPR030W   | -1.052080855 | 3.635370849  | 3.613309488  | 1.006105583  |
| NTO1      | YPR031W   | -1.113635113 | -1.792376871 | -2.168021855 | 1.209579241  |
| SRO7      | YPR032W   | 1.04055673   | -1.222769052 | 1.033336986  | 1.183320706  |



|         |         |              |              |              |              |
|---------|---------|--------------|--------------|--------------|--------------|
| HTS1    | YPR033C | -1.03246094  | -3.518561774 | -4.115441872 | 1.169637521  |
| ARP7    | YPR034W | -1.036125527 | -1.278212862 | -1.336152235 | 1.045328422  |
| GLN1    | YPR035W | -1.431524423 | -1.943320724 | -2.25464984  | 1.1602047    |
| VMA13   | YPR036W | -1.164231304 | -1.021851967 | -1.104641672 | 1.128780266  |
| ERV2    | YPR037C | -1.129741316 | -2.246204064 | -1.732173945 | -1.29675433  |
| YPR039W | YPR039W | 1.48615016   | -1.222157656 | -1.200900752 | 1.467690048  |
| SDF1    | YPR040W | -1.205504061 | -1.004865491 | 1.072712433  | -1.067518431 |
| TIF5    | YPR041W | -1.061077796 | -4.228421444 | -4.752641863 | 1.123975442  |
| PUF2    | YPR042C | 1.124696868  | 2.602499907  | 2.390823924  | 1.088536834  |
| RPL43A  | YPR043W | -1.073470646 | -6.508023178 | -3.737326574 | -1.741357906 |
| YPR044C | YPR044C | 1.125001427  | -4.713324887 | -3.223757291 | -1.462059474 |
| YPR045C | YPR045C | -1.182653277 | -1.556892414 | 1.788149327  | -1.148537505 |
| MCM16   | YPR046W | -1.191865699 | -1.516513223 | -1.038067537 | -1.460900346 |
| MSF1    | YPR047W | -1.386178837 | -1.8734047   | 2.55400378   | -1.363295278 |
| TAH18   | YPR048W | -1.100453272 | -3.259251421 | -3.232836201 | -1.008170912 |
| CVT9    | YPR049C | -1.096471775 | -1.132492146 | -1.016410273 | 1.151076651  |
| MAK3    | YPR051W | 1.016133877  | -2.16596151  | -1.937014876 | -1.118195599 |
| NHP6A   | YPR052C | 1.263017245  | -1.613480099 | -1.643336357 | 1.018504261  |
| YPR053C | YPR053C | 1.253316629  | -1.791432187 | 1.651197091  | 1.08492935   |
| SEC8    | YPR055W | -1.099312995 | -1.623964935 | 1.472585056  | 1.102798734  |
| TFB4    | YPR056W | -1.134973044 | -1.73484758  | -2.274078713 | 1.310823348  |
| BRR1    | YPR057W | -1.13954952  | -1.354160068 | -1.224680954 | -1.105724772 |
| YMC1    | YPR058W | -1.004692308 | -3.356732321 | -3.449536859 | 1.027647285  |
| ARO7    | YPR060C | -1.123530851 | -1.780024703 | -2.148513032 | 1.207013042  |
| YPR061C | YPR061C | -1.077997328 | 2.162816136  | 1.730464967  | 1.24984682   |
| FCY1    | YPR062W | -1.1647136   | -1.894240579 | -1.585724981 | -1.194558074 |
| YPR063C | YPR063C | 1.007556072  | -1.136255273 | -1.019798426 | -1.114195946 |
| ROX1    | YPR065W | 1.028555264  | -1.328429882 | -1.438568973 | 1.082909224  |
| UBA3    | YPR066W | -1.134283406 | -1.282008904 | 1.372858455  | -1.070864992 |
| ISA2    | YPR067W | -1.149498183 | -1.097799592 | 1.062757597  | -1.166694855 |
| HOS1    | YPR068C | -1.259299929 | -1.223366367 | -1.116079389 | -1.096128446 |
| SPE3    | YPR069C | 1.016546271  | -1.402113045 | -1.225794455 | -1.143840257 |
| MED1    | YPR070W | -1.268434761 | -1.238882825 | -1.233106395 | -1.004684454 |
| YPR071W | YPR071W | -1.064883552 | -1.0173868   | 1.133524155  | -1.114152607 |
| NOT5    | YPR072W | -1.177938565 | -1.140258182 | 1.081504274  | -1.233194098 |
| LTP1    | YPR073C | -1.228558958 | -1.146495702 | 1.486055939  | -1.296172272 |
| TKL1    | YPR074C | 1.221082609  | -2.517425104 | -2.620044904 | 1.040763795  |
| OPY2    | YPR075C | -1.065028887 | -1.307853131 | 1.435460552  | -1.097570145 |
| YPR077C | YPR077C | -1.122960403 | -1.534768962 | 1.722571631  | -1.122365434 |
| MRL1    | YPR079W | -1.11050283  | 2.677228627  | 3.490766958  | -1.303873312 |
| YPR081C | YPR081C | 1.053633734  | 2.960420714  | 2.489309736  | 1.189253659  |
| DIB1    | YPR082C | -1.068447296 | -1.439262539 | -1.253434592 | -1.148255    |
| YPR083W | YPR083W | -1.084483387 | -1.004671504 | -1.064363193 | 1.059414136  |
| YPR084W | YPR084W | -1.050687859 | -1.242385751 | 1.258096921  | -1.012645967 |
| YPR085C | YPR085C | -1.178270182 | -1.106431102 | -1.272374492 | 1.14998077   |
| SUA7    | YPR086W | -1.10756302  | -1.838709685 | -1.480345549 | -1.242081409 |
| VPS69   | YPR087W | -1.372286916 | -1.648221954 | 1.153805643  | -1.901727792 |
| SRP54   | YPR088C | -1.13100698  | -1.434184553 | -1.240861945 | -1.155797032 |
| YPR089W | YPR089W | -1.032340953 | -1.169464956 | 1.008949604  | -1.179931205 |

|               |                |              |              |              |              |
|---------------|----------------|--------------|--------------|--------------|--------------|
| YPR090W       | YPR090W        | -1.036701427 | -1.056415971 | -1.335113874 | 1.26381455   |
| YPR091C       | YPR091C        | -1.026234829 | -1.923924744 | 1.567645792  | 1.227270059  |
| YPR093C       | YPR093C        | -1.113789039 | 2.227129492  | 2.344004897  | -1.052478047 |
| RDS3          | YPR094W        | 1.013299364  | -1.35740796  | 1.002441629  | -1.360722247 |
| SYT1          | YPR095C        | -1.003609151 | -1.269386216 | -1.270213328 | 1.000651584  |
| YPR097W       | YPR097W        | 1.069377689  | -1.05453859  | -1.200434008 | 1.265903986  |
| YPR098C       | YPR098C        | 1.162749751  | -1.723259189 | 1.362466108  | 1.264808848  |
| YPR099C       | YPR099C        | 1.234940308  | -1.836712851 | -2.310674689 | 1.258048958  |
| YPR100W       | YPR100W        | -1.046471837 | -1.082922512 | 1.127269865  | -1.040951549 |
| SNT309        | YPR101W        | -1.239735589 | -1.265605727 | -1.045872086 | -1.210096094 |
| <b>RPL11A</b> | <b>YPR102C</b> | -1.232083762 | -9.891219373 | -6.134257991 | -1.612455718 |
| PRE2          | YPR103W        | -1.196844566 | -1.143567279 | 1.11426498   | 1.026297423  |
| FHL1          | YPR104C        | -1.166227128 | -1.464028378 | -1.365314915 | -1.072300875 |
| COG4          | YPR105C        | -1.111337631 | -1.234693017 | -1.208915533 | -1.021322817 |
| ISR1          | YPR106W        | 1.18087131   | -1.068564917 | -1.162230011 | 1.241918215  |
| YTH1          | YPR107C        | -1.076079046 | -1.401906349 | 1.322214287  | 1.06027167   |
| RPN7          | YPR108W        | -1.221361453 | -1.55517326  | 1.554951444  | 1.000142652  |
| YPR109W       | YPR109W        | 1.022680902  | -1.139060536 | 1.175048058  | -1.031594038 |
| RPC40         | YPR110C        | -1.060035009 | -11.14165926 | -12.26285571 | 1.100631012  |
| DBF20         | YPR111W        | -1.070919772 | -1.140296494 | 1.000534802  | 1.139686987  |
| MRD1          | YPR112C        | 1.02582289   | -21.45292774 | -23.09481876 | 1.07653459   |
| PIS1          | YPR113W        | 1.047016374  | -1.652357608 | -1.304466391 | -1.266692357 |
| YPR114W       | YPR114W        | 1.2896817    | -1.167090795 | -1.35055529  | 1.157198134  |
| YPR115W       | YPR115W        | -1.020174895 | -1.527139309 | 1.317885475  | 1.158779984  |
| YPR116W       | YPR116W        | -1.063528155 | -1.143067956 | 1.358861174  | -1.553270665 |
| YPR117W       | YPR117W        | 1.317482623  | -1.093809589 | -1.099617543 | 1.005309839  |
| YPR118W       | YPR118W        | 1.003085036  | -4.325260302 | -4.501080987 | 1.040649735  |
| CLB2          | YPR119W        | 1.078577931  | -1.742926323 | -2.386738588 | 1.369385817  |
| CLB5          | YPR120C        | -1.199055922 | -2.944058388 | -1.899598362 | -1.549832032 |
| THI22         | YPR121W        | 1.138348069  | -1.130825747 | -1.496827274 | 1.323658644  |
| AXL1          | YPR122W        | -1.059950544 | -1.35542305  | -1.459202864 | 1.076566363  |
| YPR123C       | YPR123C        | 1.063965702  | -1.031409546 | -1.540933624 | 1.589333649  |
| CTR1          | YPR124W        | 1.040549731  | -1.072275691 | -1.18495814  | 1.270601809  |
| YPR125W       | YPR125W        | -1.591025944 | -1.292738976 | 1.011535608  | -1.307651506 |
| YPR127W       | YPR127W        | 1.025967349  | 2.021653615  | 1.683747541  | 1.2006869    |
| ANT1          | YPR128C        | 1.242888898  | -1.404034217 | -1.779994919 | 1.267771752  |
| SCD6          | YPR129W        | -1.136309415 | -1.015911329 | -1.218117897 | 1.237499772  |
| NAT3          | YPR131C        | -1.293538883 | -1.330203852 | 1.007760626  | -1.340527067 |
| <b>RPS23B</b> | <b>YPR132W</b> | -1.325939269 | -7.997557578 | -5.13039554  | -1.558857892 |
| IWS1          | YPR133C        | -1.153474518 | -1.622519459 | -1.251680385 | -1.296272976 |
| TOM5          | YPR133W-A      | 1.049536225  | -1.855137812 | -1.566651598 | -1.184141908 |
| MSS18         | YPR134W        | -1.413628048 | -1.049012364 | 1.233562536  | -1.175927547 |
| CTF4          | YPR135W        | -1.094249002 | -1.261456206 | -1.25866603  | -1.002216772 |
| RRP9          | YPR137W        | 1.063438732  | -5.261003738 | -8.099230848 | 1.539483957  |
| MEP3          | YPR138C        | 1.107271548  | -1.415801134 | 1.007511786  | 1.405245232  |
| VPS66         | YPR139C        | -1.204023287 | -1.328501264 | -1.256960361 | -1.056915799 |
| YPR140W       | YPR140W        | -1.019916595 | -1.692800998 | 1.498521521  | 1.129647438  |
| KAR3          | YPR141C        | -1.053775452 | -1.173287073 | -1.438491652 | 1.226035542  |
| YPR143W       | YPR143W        | -1.035275685 | -5.481771273 | -7.447128513 | 1.358525947  |

|         |         |              |              |              |              |
|---------|---------|--------------|--------------|--------------|--------------|
| UTP19   | YPR144C | 1.14061059   | -16.32713376 | -21.69035474 | 1.32848515   |
| ASN1    | YPR145W | 1.013916689  | -2.641070961 | -2.422459134 | -1.090243763 |
| YPR146C | YPR146C | 1.109213686  | -1.014060931 | 1.046155102  | -1.060865016 |
| YPR147C | YPR147C | 1.102175009  | -1.131006287 | -1.100301289 | 1.244447675  |
| YPR148C | YPR148C | -1.18001608  | -1.234171484 | 1.406438395  | -1.139581017 |
| NCE102  | YPR149W | 1.260729839  | 4.081066504  | 3.063272638  | 1.332257029  |
| YPR150W | YPR150W | 1.137384598  | -1.985171462 | 1.359235658  | 1.460505726  |
| YPR151C | YPR151C | 1.13172062   | 5.698046665  | 5.266267874  | 1.081989523  |
| YPR152C | YPR152C | 1.090966071  | -1.231459875 | -1.035133288 | -1.189663098 |
| PIN3    | YPR154W | 1.132523339  | 6.176308652  | 8.0606151    | -1.305086186 |
| NCA2    | YPR155C | -1.09108451  | -1.582082203 | 1.51303117   | 1.045637548  |
| TPO3    | YPR156C | 1.200807143  | -1.059899195 | -1.550028906 | 1.462430496  |
| YPR157W | YPR157W | -1.011566189 | -1.075178554 | 1.21130857   | -1.126611543 |
| YPR158W | YPR158W | -1.182023984 | 3.810164755  | 5.475315244  | -1.437028474 |
| KRE6    | YPR159W | 1.179728811  | -1.53443919  | -1.544567598 | 1.006600723  |
| GPH1    | YPR160W | 1.29527227   | 52.83579187  | 51.45236135  | 1.0268876    |
| SGV1    | YPR161C | -1.022771334 | -1.408912786 | -1.71105911  | 1.214453533  |
| ORC4    | YPR162C | -1.15294024  | -1.175650651 | 1.109856536  | 1.05928164   |
| TIF3    | YPR163C | -1.174225709 | -10.37237417 | -8.331047763 | -1.245026372 |
| MMS1    | YPR164W | 1.027706793  | -1.240226603 | -1.118921073 | -1.108412946 |
| RHO1    | YPR165W | 1.03673631   | -1.022675846 | 1.00964575   | 1.012905612  |
| MRP2    | YPR166C | 1.026677369  | -1.318657702 | -1.184258095 | -1.113488442 |
| MET16   | YPR167C | -1.197335678 | -1.580007538 | -1.194098227 | -1.323180541 |
| JIP5    | YPR169W | 1.067872892  | -2.050459065 | -2.830267892 | 1.380309385  |
| YPR171W | YPR171W | -1.218219677 | -1.006539473 | 1.258562522  | -1.266792858 |
| YPR172W | YPR172W | 1.16131241   | -1.658049345 | 1.741987665  | -1.050624742 |
| VPS4    | YPR173C | -1.048179731 | -1.107476438 | 1.010125521  | -1.118690215 |
| YPR174C | YPR174C | 1.128441512  | -1.08003836  | 1.558435423  | -1.442944511 |
| DPB2    | YPR175W | -1.033543777 | -1.000109935 | 1.279348738  | -1.279489382 |
| BET2    | YPR176C | 1.081225252  | -1.034609759 | -1.061729972 | 1.026212988  |
| PRP4    | YPR178W | -1.127211485 | -1.143213277 | 1.320230328  | -1.154841668 |
| PLO1    | YPR179C | -1.03312344  | -1.120556903 | -1.02538973  | 1.14900754   |
| AOS1    | YPR180W | -1.012158912 | -1.697140768 | 1.366899156  | 1.241599105  |
| SEC23   | YPR181C | 1.205305487  | -1.143484413 | -1.144575242 | 1.308803949  |
| SMX3    | YPR182W | 1.017458544  | -1.285123971 | 1.084269332  | -1.393420509 |
| DPM1    | YPR183W | 1.055219247  | -1.295276119 | 1.051882351  | -1.362478089 |
| GDB1    | YPR184W | 1.221366794  | 14.63938966  | 12.9933544   | 1.126682858  |
| APG13   | YPR185W | -1.141942995 | -1.362849341 | 1.577406792  | -1.157432994 |
| PZF1    | YPR186C | -1.146552649 | -1.524335542 | -1.781687171 | 1.168828726  |
| RPO26   | YPR187W | -1.047393769 | -5.675640344 | -5.939822605 | 1.046546694  |
| MLC2    | YPR188C | -1.142767754 | -1.176257704 | 1.310905338  | -1.114471203 |
| SKI3    | YPR189W | 1.007529085  | -1.032873393 | -1.132483965 | 1.096440254  |
| RPC82   | YPR190C | 1.030246003  | -4.138004591 | -5.228923317 | 1.263634006  |
| QCR2    | YPR191W | 1.114463377  | 2.818797696  | 2.262043868  | 1.246128661  |
| AQY1    | YPR192W | -1.008279344 | -1.759470423 | 1.847024156  | -1.049761412 |
| YPR196W | YPR196W | 1.069229177  | -1.217945727 | 1.103352544  | 1.103859083  |
| SGE1    | YPR198W | 1.22176096   | -1.06434279  | -1.326637495 | 1.246438185  |
| ARR1    | YPR199C | 1.01632508   | -1.323734037 | 1.243994169  | 1.064099873  |
| ARR2    | YPR200C | 1.121753018  | -1.313739061 | -1.048838403 | -1.25256575  |

|         |         |              |              |              |              |
|---------|---------|--------------|--------------|--------------|--------------|
| YPR202W | YPR202W | 1.045899293  | -1.359657544 | 1.051416365  | -1.429566194 |
| YPR203W | YPR203W | 1.049868635  | -1.384529863 | -1.108625792 | -1.248870334 |
| YPR204W | YPR204W | -1.058410708 | -1.080937244 | 1.153896557  | -1.247289764 |

Negative values indicate reduction of expression in *hho1* $\Delta$  relative to wild type.

Genes highlighted in yellow met the criteria detailed in the text and whose GO annotation includes “translation”.
