# Supplementary material
Source: PubMed Central journal article supplement (PMC2575252)

\$slcompose,+ zpq-pnas zpq-pnas zpq69908 zpq4406-08a\$sl

<zkeybdr;disk;bc>

<XXzpq999084406XX>

<<tt>>Dataset S2. Primers used for creation of *hho1* mutants Graphic display of Gene Ontology according to [http://genie.weizmann.ac.il/genomica\\_web/enrichment/gene\\_sets.jsp](http://genie.weizmann.ac.il/genomica_web/enrichment/gene_sets.jsp)

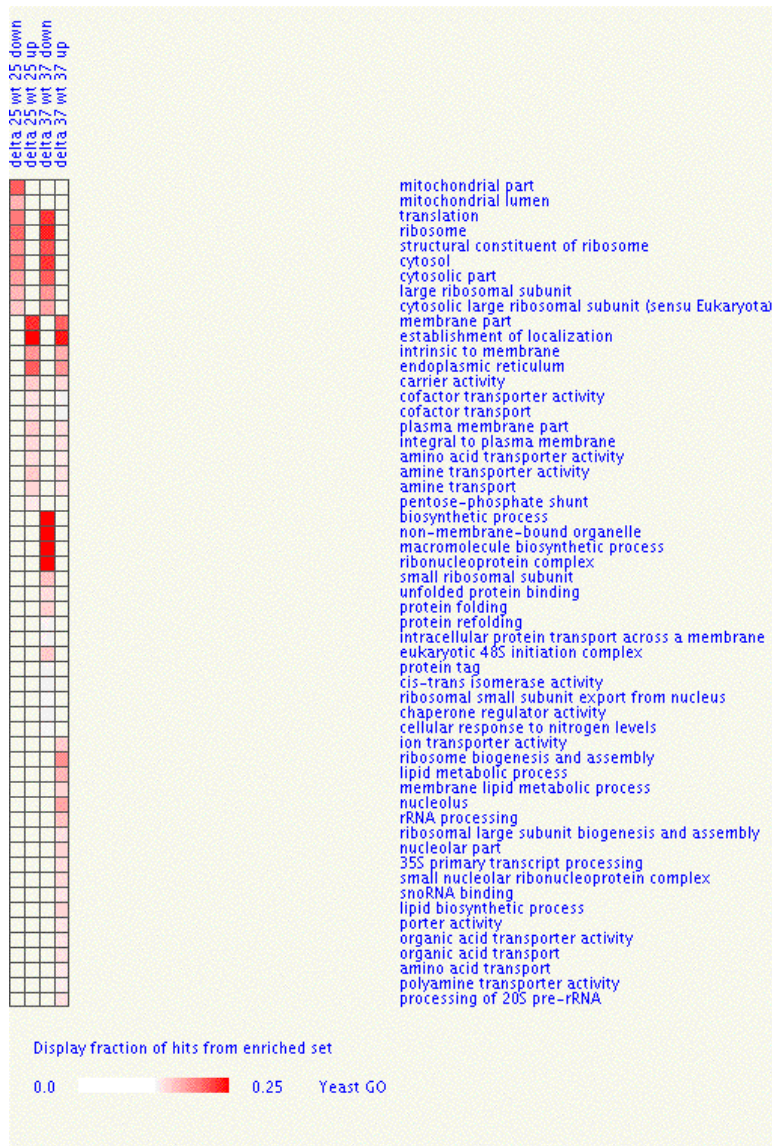

Supplement: 0709403105_SD2.pdf [file 0709403105_SD2.pdf]
